# Supplementary material for: Diversely Functionalised Cytochalasins through Mutasynthesis and Semi‐Synthesis
Source: PubMed Central journal article supplement — Chemistry. 2020 Sep 17;26(60):13578–83. doi: 10.1002/chem.202002241 (PMC7692911; doi:10.1002/chem.202002241), 2020-09-17
Supplement: CHEM-26-13578-s001.pdf [file CHEM-26-13578-s001.pdf]

# Chemistry–A European Journal

Supporting Information

## Diversely Functionalised Cytochalasins through Mutasyntesis and Semi-Synthesis

Chongqing Wang,<sup>[a]</sup> Christopher Lambert,<sup>[b, d]</sup> Maurice Hauser,<sup>[a]</sup> Adrian Deuschmann,<sup>[a]</sup>  
Carsten Zeilinger,<sup>[a]</sup> Klemens Rottner,<sup>[c, d]</sup> Theresia E. B. Stradal,<sup>[c]</sup> Marc Stadler,<sup>[b]</sup>  
Elizabeth J. Skellam,<sup>[a]</sup> and Russell J. Cox<sup>\*[a]</sup>

|            |                                                                     |            |
|------------|---------------------------------------------------------------------|------------|
| <b>1.0</b> | <b>Fermentation and Metabolite Preparation and Characterisation</b> | <b>2</b>   |
| 1.01       | Strains and Culture Conditions                                      | 2          |
| 1.02       | Fermentation and Extraction Protocols                               | 2          |
| 1.03       | Feeding Studies                                                     | 2          |
| 1.04       | Analytical LCMS                                                     | 3          |
| 1.05       | Preparative LCMS                                                    | 3          |
| 1.06       | HRMS                                                                | 3          |
| 1.07       | NMR                                                                 | 3          |
| 1.08       | IR                                                                  | 3          |
| 1.09       | 4'-Iodo cytochalasin H <b>1e</b>                                    | 4          |
| 1.10       | 4'-(O-Prop-2-enyl) cytochalasin H <b>1f</b>                         | 8          |
| 1.11       | 4'-(O-Propargyl) cytochalasin H <b>1g</b>                           | 12         |
| 1.12       | 4'-Azido cytochalasin H <b>1h</b>                                   | 16         |
| <b>2.0</b> | <b>Synthetic Procedures and Characterisation</b>                    | <b>20</b>  |
| 2.01       | 4'-Amino cytochalasinH <b>1i</b>                                    | 20         |
| 2.02       | 4'-(1-(4-Methyltriazolyl)) cytochalasin H <b>5a</b>                 | 25         |
| 2.03       | 4'-(1-(4-Phenyltriazolyl)) cytochalasin H <b>5b</b>                 | 30         |
| 2.04       | 4'-(1-(4- <i>p</i> -Bromophenyltriazolyl)) cytochalasin H <b>5c</b> | 35         |
| 2.05       | Biotin propargyl ester <b>6a</b>                                    | 40         |
| 2.06       | Biotin but-3-ynyl ester <b>6b</b>                                   | 44         |
| 2.07       | Biotin pent-4-ynyl ester <b>6c</b>                                  | 48         |
| 2.08       | 4'-Biotin-triazole-linkedcytochalasin H <b>7a</b>                   | 52         |
| 2.09       | 4'-Biotin-triazole-linkedcytochalasin H <b>7b</b>                   | 57         |
| 2.10       | 4'-Biotin-triazole-linkedcytochalasin H <b>7c</b>                   | 62         |
| 2.11       | Biotin azide linker <b>8</b>                                        | 67         |
| 2.12       | 4'-O-Biotin-linked cytochalasin H <b>9</b>                          | 72         |
| 2.13       | O-Propargyl penicillin G <b>10</b>                                  | 77         |
| 2.14       | Cytochalasin H penicillin G adduct <b>11</b>                        | 78         |
| 2.15       | 4'-Perylene linked cytochalasin H <b>13</b>                         | 84         |
| 2.16       | 4'-Coumarin dye-linked cytochlorasin H <b>15</b>                    | 89         |
| 2.17       | Dye-linked cytochalasin <b>17</b>                                   | 94         |
| 2.18       | Dye-Linked cytochalasinH <b>19</b>                                  | 100        |
| 2.19       | 4'-Dye-Linked cytochalasin H <b>21</b>                              | 105        |
| 2.20       | 4'-Prop-1-ynyl cytochalsin H <b>22</b>                              | 110        |
| 2.21       | 4'-Pinacolborolanyl cytochalasin H <b>23</b>                        | 115        |
| 2.22       | 4'-4' Cytochalasin H dimer <b>24</b>                                | 115        |
| 2.23       | Cytochalasin H dimer <b>25</b>                                      | 125        |
| 2.24       | Bis acetylene linker <b>26</b>                                      | 129        |
| 2.25       | Dimeric cytochalasin H <b>27</b>                                    | 129        |
| <b>3.0</b> | <b><i>In vivo</i> Procedures</b>                                    | <b>134</b> |
| 3.01       | Growth Inhibition of Fungal Strains                                 | 134        |
| 3.02       | Cytotoxicity Assays                                                 | 135        |
| 3.03       | <i>In vivo</i> Effects on Actin Cytoskeleton                        | 136        |
| <b>4.0</b> | <b>References</b>                                                   | <b>141</b> |

## 1.0 Fermentation and Metabolite Preparation and Characterisation

### 1.01 Strains and Culture Conditions

*M. grisea* NI980 is a *Digitaria smutsii* isolate obtained from our collaborators and was used as the wild-type strain in this study. Strains were cultivated on Oatmeal Agar (OMA) (4% w/v oat meal, 0.5% w/v sucrose, 2% agar) or Complete Medium (CM) agar at 25°C. For cytochalasan production, strains were cultivated in Soy Sauce Sucrose (SSS) medium (5% v/v soy sauce, 5% w/v sucrose, in autoclaved tap water) or DPY liquid medium (2% w/v dextrin from potato starch, 1% w/v polypeptone, 0.5% w/v yeast extract, 0.5% w/v monopotassium phosphate, 0.05% w/v magnesium sulfate, 2.5% w/v agar) for 7 days at 25 °C, 110 rpm.

### 1.02 Fermentation and Extraction Protocols

For extraction, *M. grisea* spores were collected from MG agar plates incubated for 7 days and inoculated into 500 mL Erlenmeyer flasks containing 100 mL DPY. The spores were allowed to grow in the liquid culture for 7-8 days on shakers at 110 rpm at 25 °C. The cells were blended in the fermentation broth, filtered to remove the mycelium, and transferred into a separating funnel. An equal volume of EtOAc was added into the separating funnel and the aqueous layer was extracted twice. The organic solvent from the two extractions was combined and dried with MgSO<sub>4</sub>, filtered and evaporated to dryness. The crude extract was dissolved into 1 mL HPLC grade MeOH.

### 1.03 Feeding Studies

200 mg of *O*-Methyl-L-tyrosine **3a** (purchased from Sigma-Aldrich) was dissolved into double distilled water (final concentration: 10 mg / mL) and filter sterilized. 200 µl of this solution was fed to the  $\Delta pyiA$  knock-out strain inoculated into 500 mL Erlenmeyer flasks containing 100 mL DPY. The feeding was repeated at 24 hour intervals four times. On the 7<sup>th</sup> day the cultures were extracted using the method described above.

200 mg of *O*-Propylene-L-tyrosine **3f** was dissolved into double distilled water (final concentration: 10 mg / mL) and filter sterilized. 200 µl of this solution was fed to the  $\Delta pyiA$  knock-out strain inoculated into 500 mL Erlenmeyer flasks containing 100 mL DPY. The feeding was repeated at 24 hour intervals four times. On the 7<sup>th</sup> day the cultures were extracted using the method described above.

200 mg of *O*-Propyne-L-tyrosine **3g** was dissolved into double distilled water (final concentration: 10 mg / mL) and filter sterilized. 200 µl of this solution was fed to the  $\Delta pyiA$  knock-out strain inoculated into 500 mL Erlenmeyer flasks containing 100 mL DPY. The feeding was repeated at 24 hour intervals four times. On the 7<sup>th</sup> day the cultures were extracted using the method described above.

200 mg of *para*-fluoro- / chloro- / bromo- / iodo-phenylalanine (**3b-3e**, purchased from Sigma-Aldrich) was dissolved into double distilled water (final concentration: 10 mg / mL), stirred at 60 °C until dissolved completely and filter sterilized. 200 µl of this solution was fed to the  $\Delta pyiA$  knock-out strain inoculated into 500 mL Erlenmeyer flasks containing 100 mL DPY. The feeding was repeated at 24 hour intervals four times. On the 7<sup>th</sup> day the cultures were extracted using the method described above.

200 mg of *para*-azido-phenylalanine **3h** (purchased from abcr) was dissolved into double distilled water (final concentration: 10 mg / mL) and filter sterilized. 200 µl of this solution was fed to the  $\Delta pyiA$  knock-out strain inoculated into 500 mL Erlenmeyer flasks containing 100 mL DPY. The feeding was repeated at 24 hour intervals four times. On the 7<sup>th</sup> day the cultures were extracted using the method described above.

#### 1.04 Analytical LCMS

LCMS data were obtained using a Waters LCMS system comprising of a Waters 2767 autosampler, Waters 2545 pump system and a Phenomenex Kinetex column (2.6  $\mu$ , C<sub>18</sub>, 100 Å, 4.6  $\times$  100 mm) equipped with a Phenomenex Security Guard precolumn (Luna C<sub>5</sub> 300 Å) eluted at 1 mL/min. Detection was performed by Waters 2998 diode array detector between 200 and 600 nm; Waters 2424 ELSD and Waters SQD-2 mass detector operating simultaneously in ES<sup>+</sup> and ES<sup>-</sup> modes between 100 m/z and 650 m/z. Solvents were A, HPLC-grade H<sub>2</sub>O containing 0.05% formic acid; and B, HPLC-grade CH<sub>3</sub>CN containing 0.045% formic acid. Gradients were as follows: Method 1 (optimised for non-polar compounds): 0 min, 10% B; 10 min 90% B; 12 min, 90% B; 13 min, 10% B and 15 min, 10% B. Method 2 (optimised for polar compounds): 0 min, 10% B; 10 min 40% B; 12 min, 90% B; 13 min, 10% B and 15 min, 10% B.

#### 1.05 Preparative LCMS

Compounds were purified using a Waters massdirected autopurification system consisting of a Waters 2545 pump and Waters 2767 autosampler. The chromatography column was a Phenomenex Kinetex Axia column (5 $\mu$ , C<sub>18</sub>, 100 Å, 21.2  $\times$  250 mm) fitted with a Luna C<sub>5</sub> 300 Å Phenomenex Security Guard precolumn. The column was eluted at 20 mL/min at 22 °C. Solvents used were A, H<sub>2</sub>O + 0.05% formic acid; and B, CH<sub>3</sub>CN + 0.045% formic acid. All solvents were HPLC grade. The column outlet was split (100:1) and the minority flow was supplemented with HPLC-grade MeOH + 0.045% formic acid to 1000  $\mu$ L/min and diverted for interrogation by diode array (Waters 2998) and evaporative light-scattering (Waters 2424) detectors. The flow was also analysed by mass spectrometry (Waters SQD-2 in ES<sup>+</sup> and ES<sup>-</sup> modes). Desired compounds were collected into glass test tubes. Combined fractions were evaporated *in vacuo*, then dissolved directly in HPLC-grade MeOH to make the final concentration 10 mg / mL, 300  $\mu$ L solution was loaded into the column for purification.

#### 1.06 HRMS

HRMS was obtained using a UPLC system (Waters Acquity Ultraperformance, running the same method and column as above) connected to a Q-TOF Premier mass spectrometer.

#### 1.07 NMR

A Bruker Avance 500 instrument equipped with a cryo-cooled probe at 500 MHz (<sup>1</sup>H)/125 MHz (<sup>13</sup>C) and 600 MHz (<sup>1</sup>H)/150 MHz (<sup>13</sup>C) were used for all NMR analysis. Standard parameters were used for the collection of 2D spectra (<sup>1</sup>H, <sup>1</sup>H-correlation spectroscopy [COSY], heteronuclear single-quantum coherence [HSQC] and HMBC) in the indicated solvents. <sup>1</sup>H and <sup>13</sup>C spectra are referenced relative to residual protonated solvents. All  $\delta$  values are quoted in ppm and all *J* values in Hz.

#### 1.08 IR

Infrared Spectra were recorded using a Shimadzu IRAffinity-1S fourier transform infrared spectrophotometer and quest atr diamond extended range accessory (black).



## 1.09 4'-Iodo Cytochalasin H 1e

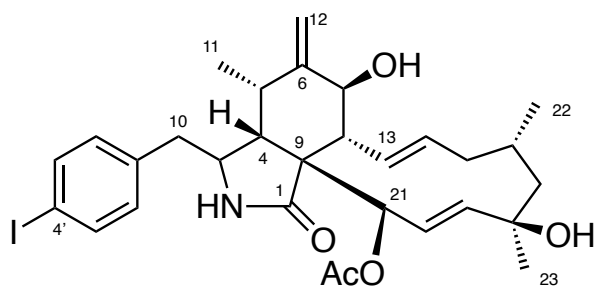

Chemical Formula:  $C_{30}H_{38}INO_5$

Exact Mass: 619.1795

| Position | $\delta_H$ | M   | $J_{H-H}/\text{Hz}$ | $\delta_C$ | HSQC            | HMBC H to C      | H-H COSY  |
|----------|------------|-----|---------------------|------------|-----------------|------------------|-----------|
| 1        | -          | -   | -                   | 174.3      | -               | -                | -         |
| 2        | 5.46       | brs | -                   | -          | -               | -                | -         |
| 3        | 3.23       | ddd | 1.1, 4.8, 9.6       | 53.5       | CH              | 1', 1, 4, 5      | 4, 5, 10  |
| 4        | 2.13       | dd  | 3.6, 5.1            | 50.5       | CH              | 1, 3, 5          | 3, 5, 10  |
| 5        | 2.80       | m   | -                   | 32.7       | CH              | 1', 3            | 4, 11, 12 |
| 6        | -          | -   | -                   | 147.9      | -               | -                | -         |
| 7        | 3.84       | dd  | 1.3, 10.8           | 69.7       | CH              | 5, 6, 8, 12, 13  | 8, 12     |
| 8        | 2.95       | dd  | 9.8, 10.8           | 47.2       | CH              | 7, 9, 13, 20, 21 | 7, 13     |
| 9        | -          | -   | -                   | 51.7       | -               | -                | -         |
| 10a      | 2.63       | dd  | 9.5, 13.5           | 45.2       | CH <sub>2</sub> | 1', 3            | 3, 4, 12  |
| 10b      | 2.82       | dd  | 4.8, 13.5           | -          | -               | -                | -         |
| 11       | 0.99       | d   | 6.7                 | 14.0       | CH <sub>3</sub> | 4, 5, 6          | 5         |
| 12a      | 5.12       | brs | -                   | 114.3      | CH <sub>2</sub> | 5, 6, 7          | 5, 7, 11  |
| 12b      | 5.37       | brs | -                   | -          | -               | -                | -         |
| 13       | 5.78       | ddd | 1.4, 9.6, 15.5      | 127.1      | CH              | 7, 8, 15         | 8, 14, 15 |
| 14       | 5.43       | ddd | 4.8, 10.3, 15.5     | 138.8      | CH              | 9, 15            | 13, 15    |
| 15a      | 1.82       | m   | -                   | 42.7       | CH <sub>2</sub> | 13, 14, 16, 17   | 13, 14,   |
| 15b      | 2.05       | m   | -                   | -          | -               | -                | -         |
| 16       | 1.81       | m   | -                   | 28.5       | CH              | 13, 14, 17       | 22        |
| 17a      | 1.60       | m   | -                   | 53.9       | CH <sub>2</sub> | 18, 19           | -         |
| 17b      | 1.89       | m   | -                   | -          | -               | -                | -         |
| 18       | -          | -   | -                   | 74.4       | -               | -                | -         |
| 19       | 5.55       | brs | -                   | 138.3      | CH              | -                | 20        |
| 20       | 5.88       | dd  | 2.9, 16.4           | 126.0      | CH              | 18, 19           | 19        |
| 21       | 5.58       | brs | -                   | 77.2       | CH              | 8, 9, 19, 20, 23 | -         |
| 22       | 1.07       | d   | 6.5                 | 26.4       | CH <sub>3</sub> | 15, 16, 17       | 16        |
| 23       | 1.37       | s   | -                   | 31.1       | CH <sub>3</sub> | 17, 18, 19       | -         |
| 1'       | -          | -   | -                   | 131.0      | -               | -                | -         |
| 2' 6'    | 6.93       | d   | 8.2                 | 131.1      | 2 x CH          | 3', 4', 5', 10   | 3', 5'    |
| 3' 5'    | 7.67       | d   | 8.2                 | 138.0      | 2 x CH          | 1', 4'           | 2', 6'    |
| 4'       | -          | -   | -                   | 137.3      | -               | -                | -         |
| 24       | -          | -   | -                   | 170.2      | -               | -                | -         |
| 25       | 2.27       | s   | -                   | 20.9       | CH <sub>3</sub> | 21, 24           | -         |

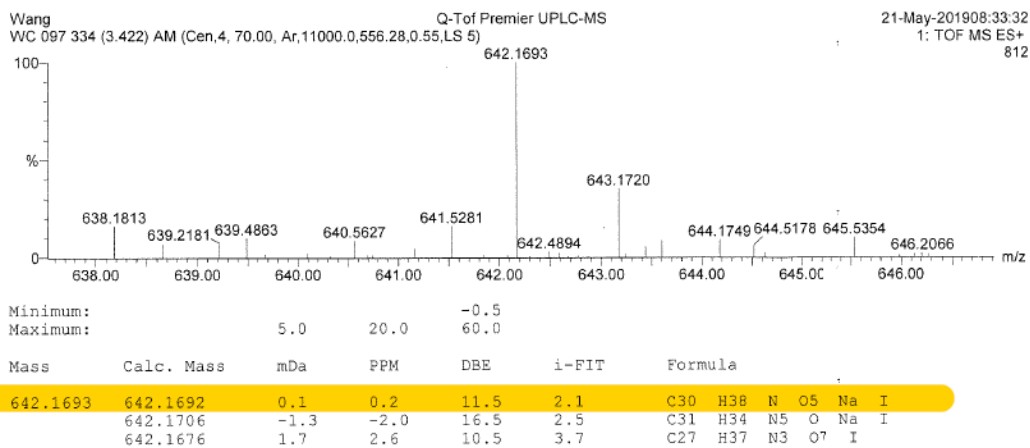

HRMS ( $m/z$ ): calculated for  $[C_{30}H_{38}NO_5I + Na]$ : 642.1692, found: 642.1693.

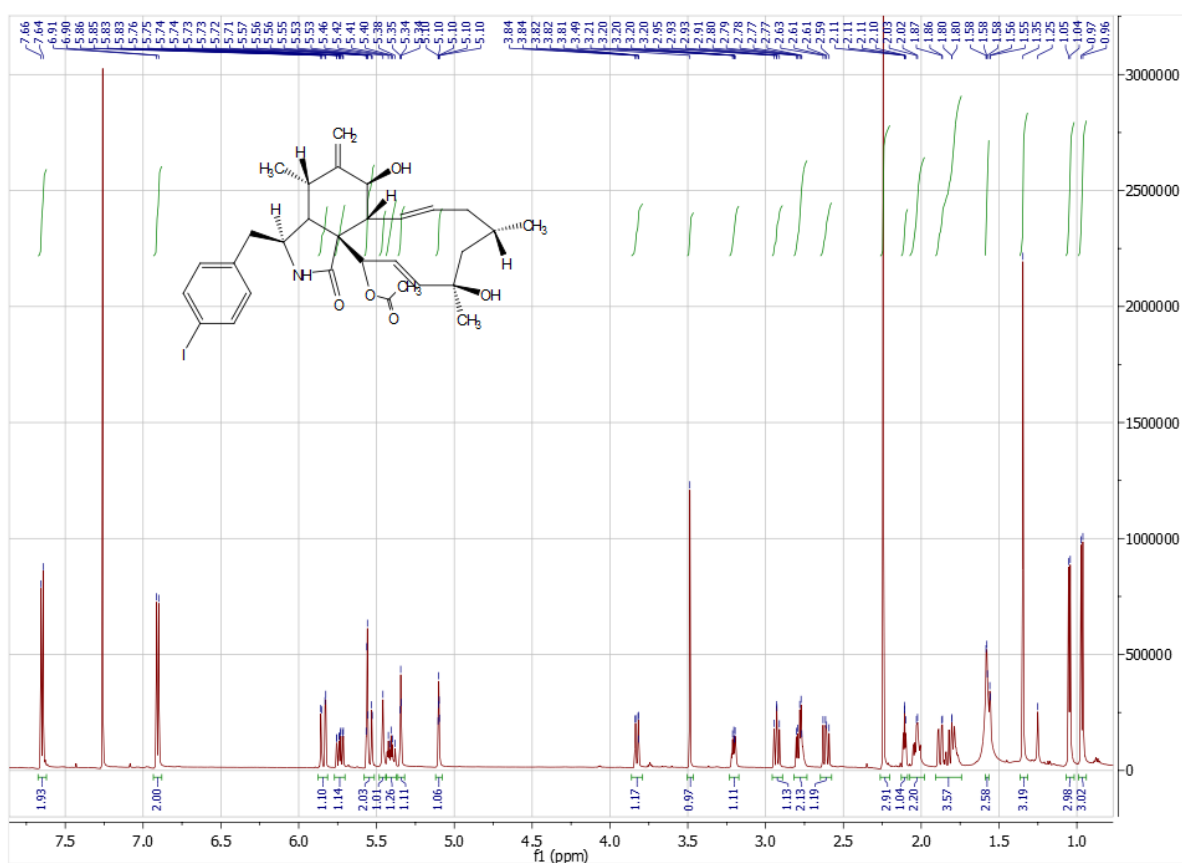

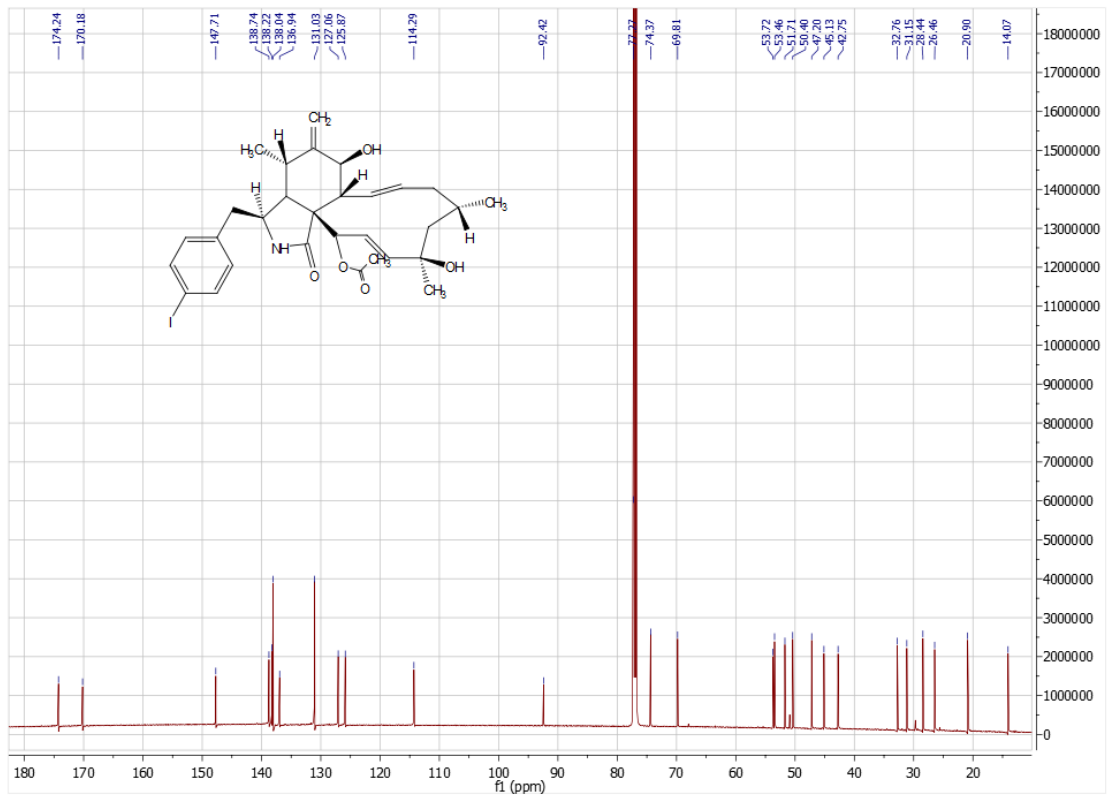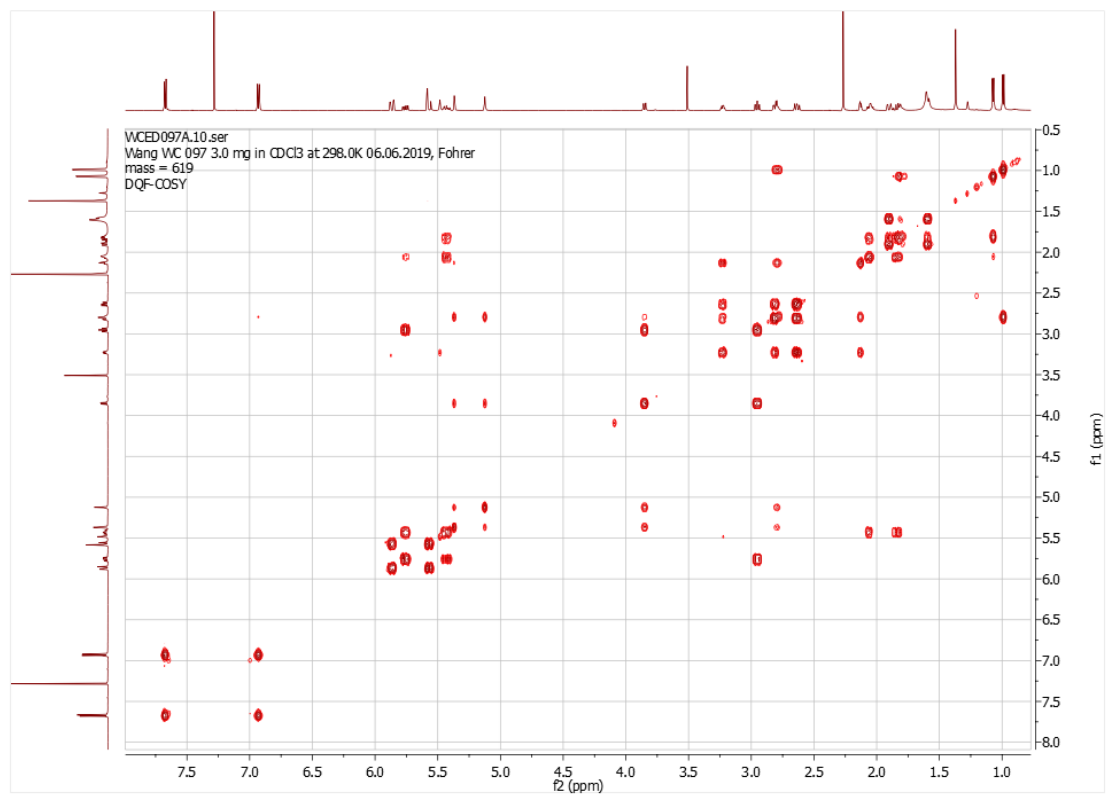

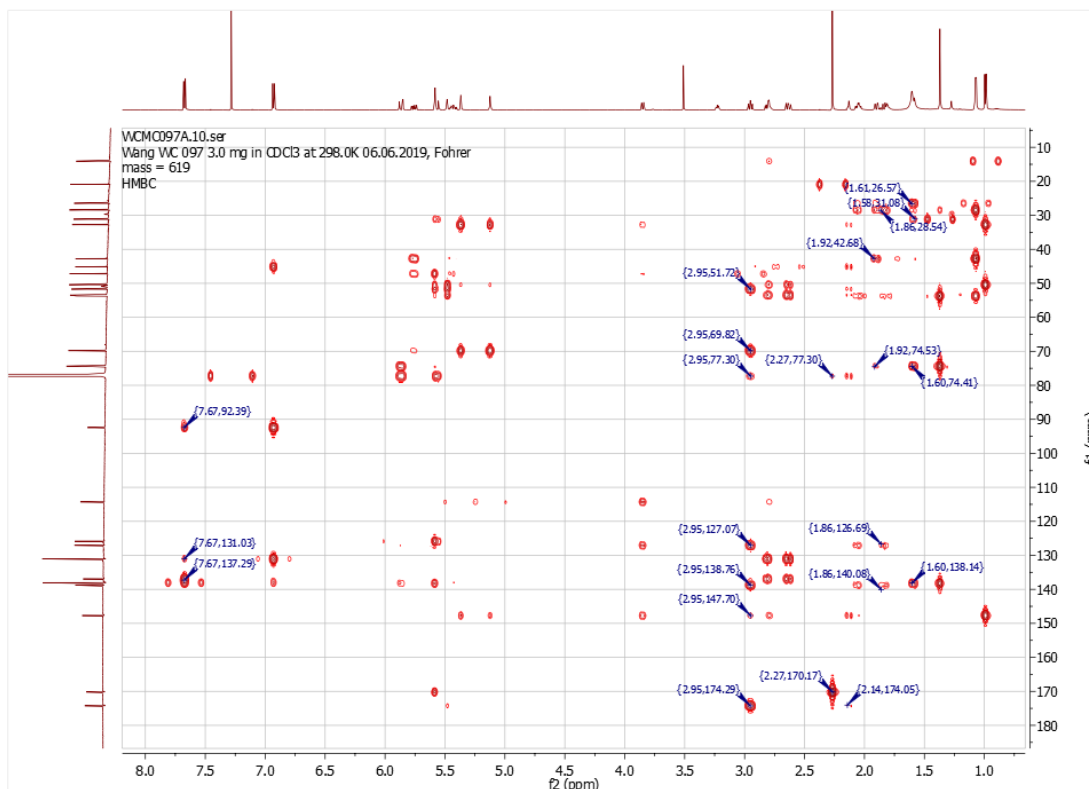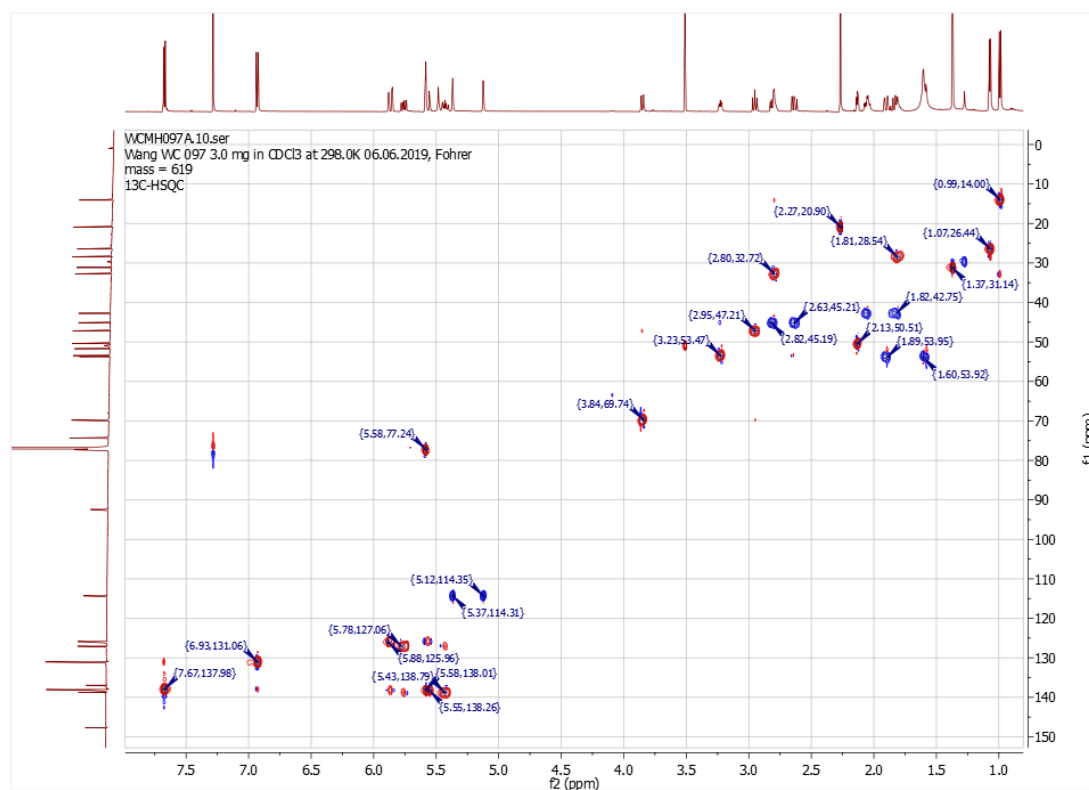

### 1.10 4'-(O-prop-2-enyl) Cytochalasin H 1f

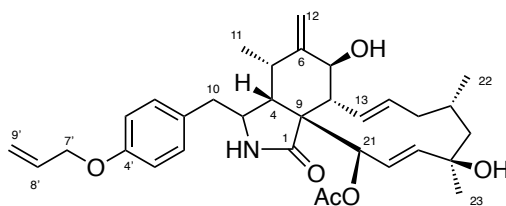

Chemical Formula: C<sub>33</sub>H<sub>43</sub>NO<sub>6</sub>  
Exact Mass: 549.3090

| Position | $\delta_H$ | M    | $J_{H-H}/\text{Hz}$      | $\delta_C$ | HSQC            | HMBC H to C             | H-H COSY  |
|----------|------------|------|--------------------------|------------|-----------------|-------------------------|-----------|
| 1        | -          | -    | -                        | 174.4      | -               | -                       | -         |
| 2        | 5.50       | brs  | -                        | -          | -               | -                       | -         |
| 3        | 3.23       | ddd  | 1.1, 5.0, 9.6            | 54.0       | CH              | 1', 1, 4, 5             | 4, 5, 10  |
| 4        | 2.12       | dd   | 3.8, 5.0                 | 50.2       | CH              | 1, 3, 5, 6, 10,<br>21   | 3, 5, 10  |
| 5        | 2.79       | m    | -                        | 33.0       | CH              | 1', 3                   | 4, 11, 12 |
| 6        | -          | -    | -                        | 147.9      | -               | -                       | -         |
| 7        | 3.87       | dd   | 1.6, 10.7                | 69.8       | CH              | 6, 12                   | 8, 12     |
| 8        | 2.96       | t    | 10.7                     | 47.3       | CH              | 7, 9, 13, 20, 21        | 7, 13     |
| 9        | -          | -    | -                        | 51.9       | -               | -                       | -         |
| 10a      | 2.62       | dd   | 9.4, 13.6                | 44.8       | CH <sub>2</sub> | 1', 3                   | 3, 4, 12  |
| 10b      | 2.81       | dd   | 4.9, 13.6                | -          | -               | -                       | -         |
| 11       | 0.99       | d    | 6.7                      | 14.1       | CH <sub>3</sub> | 4, 5, 6                 | 5         |
| 12a      | 5.13       | brs  | -                        | 114.0      | CH <sub>2</sub> | 5, 6, 7                 | 5, 7, 11  |
| 12b      | 5.37       | brs  | -                        | -          | -               | -                       | -         |
| 13       | 5.75       | ddd  | 1.4, 9.7,<br>15.4        | 127.1      | CH              | 7, 8, 15                | 8, 14, 15 |
| 14       | 5.42       | ddd  | 4.8, 10.1,<br>15.4       | 138.7      | CH              | 9, 15                   | 13, 15    |
| 15a      | 1.84       | m    | -                        | 42.8       | CH <sub>2</sub> | 13, 14, 16, 17          | 13, 14,   |
| 15b      | 2.05       | m    | -                        | -          | -               | -                       | -         |
| 16       | 1.81       | m    | -                        | 28.6       | CH              | 13, 14, 17              | 22        |
| 17a      | 1.60       | dd   | 3.0, 14.4                | 53.7       | CH <sub>2</sub> | 18, 19                  | -         |
| 17b      | 1.89       | m    | 3.0, 14.4                | -          | -               | -                       | -         |
| 18       | -          | -    | -                        | 74.4       | -               | -                       | -         |
| 19       | 5.57       | dd   | 2.3, 16.2                | 138.1      | CH              | -                       | 20        |
| 20       | 5.89       | dd   | 3.0, 16.2                | 126.0      | CH              | 18, 19                  | 19        |
| 21       | 5.57       | dd   | 2.6, 3.0                 | 77.4       | CH              | 8, 9, 19, 20, 21,<br>23 | -         |
| 22       | 1.07       | d    | 6.3                      | 26.6       | CH <sub>3</sub> | 15, 16, 17              | 16        |
| 23       | 1.37       | s    | -                        | 31.2       | CH <sub>3</sub> | 17, 18, 19              | -         |
| 1'       | -          | -    | -                        | 129.5      | -               | -                       | -         |
| 2' 6'    | 7.07       | d    | 8.3                      | 130.0      | 2 x CH          | 3', 4', 5', 10          | 3', 5'    |
| 3' 5'    | 6.88       | d    | 8.3                      | 115.1      | 2 x CH          | 1', 4'                  | 2', 6'    |
| 4'       | -          | -    | -                        | 157.7      | -               | -                       | -         |
| 24       | -          | -    | -                        | 170.1      | -               | -                       | -         |
| 25       | 2.27       | s    | -                        | 20.9       | CH <sub>3</sub> | 21, 24                  | -         |
| 7'       | 4.54       | t    | 1.6                      | 68.8       | CH <sub>2</sub> | 4', 8', 9'              | 8', 9'    |
| 8'       | 6.06       | dddd | 5.3, 10.5,<br>15.8, 22.6 | 133.2      | CH              | 7'                      | 7', 9'    |
| 9a'      | 5.30       | dd   | 1.6, 3.2                 | 117.6      | CH <sub>2</sub> | 7', 8'                  | 7', 8'    |
| 9b'      | 5.41       | m    | -                        | -          | -               | -                       | -         |

Monoisotopic Mass, Even Electron Ions  
 1449 formula(e) evaluated with 25 results within limits (all results (up to 1000) for each mass)  
 Elements Used:  
 C: 0-55 H: 0-75 N: 0-8 O: 0-6 Na: 0-1 120Sn: 0-1

Wang Q-ToF Premier UPLC-MS 13-Jun-2019 11:29:02  
 WC 127 317 (3.249) AM (Cen.4, 85.00, Ar.11000.0,556.28,0,55,LS 5) 1: TOF MS ES+ 1.34e3

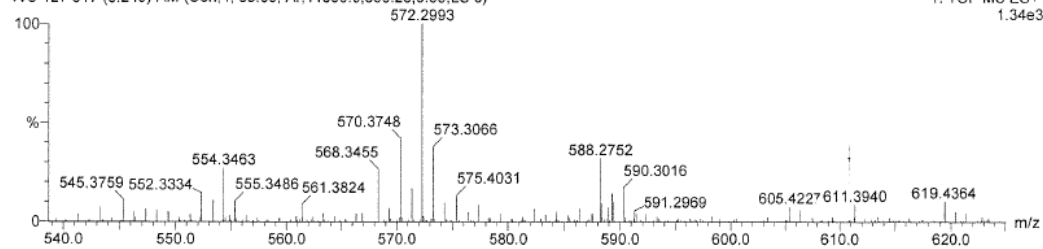

Minimum: 5.0 20.0 -0.5  
 Maximum: 572.2987 0.6 1.0 4.5 56.6

| Mass     | Calc. Mass | mDa  | PPM  | DBE  | i-FIT | Formula             |
|----------|------------|------|------|------|-------|---------------------|
| 572.2993 | 572.2988   | 0.5  | 0.9  | 12.5 | 1.1   | C33 H43 N C6 Na     |
|          | 572.2987   | 0.6  | 1.0  | 4.5  | 56.6  | C25 H50 N5 O2 120Sn |
|          | 572.2985   | 0.8  | 1.4  | 16.5 | 2.0   | C31 H38 N7 O4       |
|          | 572.3001   | -0.8 | -1.4 | 17.5 | 1.8   | C34 H39 N5 O2 Na    |

HRMS ( $m/z$ ): calculated for  $[C_{60}H_{76}N_2O_{10} + Na]$ : 572.2988, found: 572.2993.

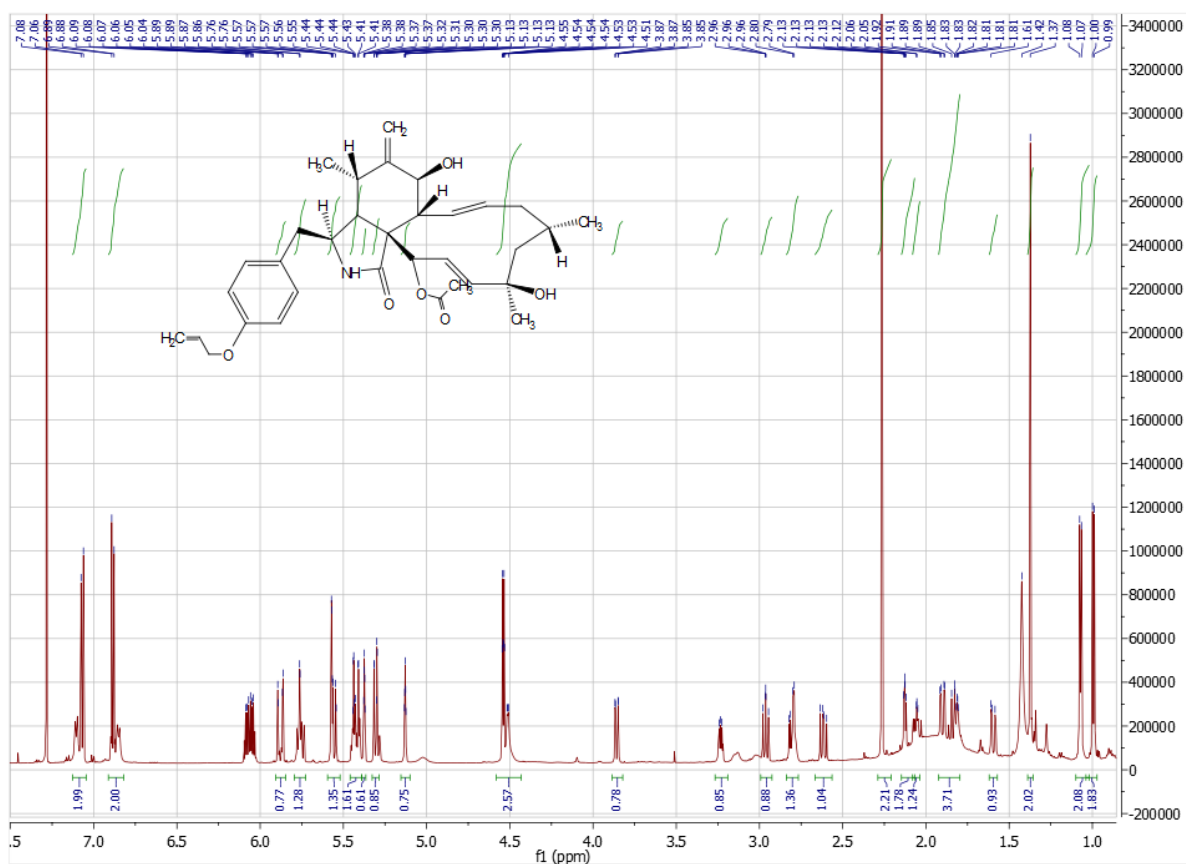

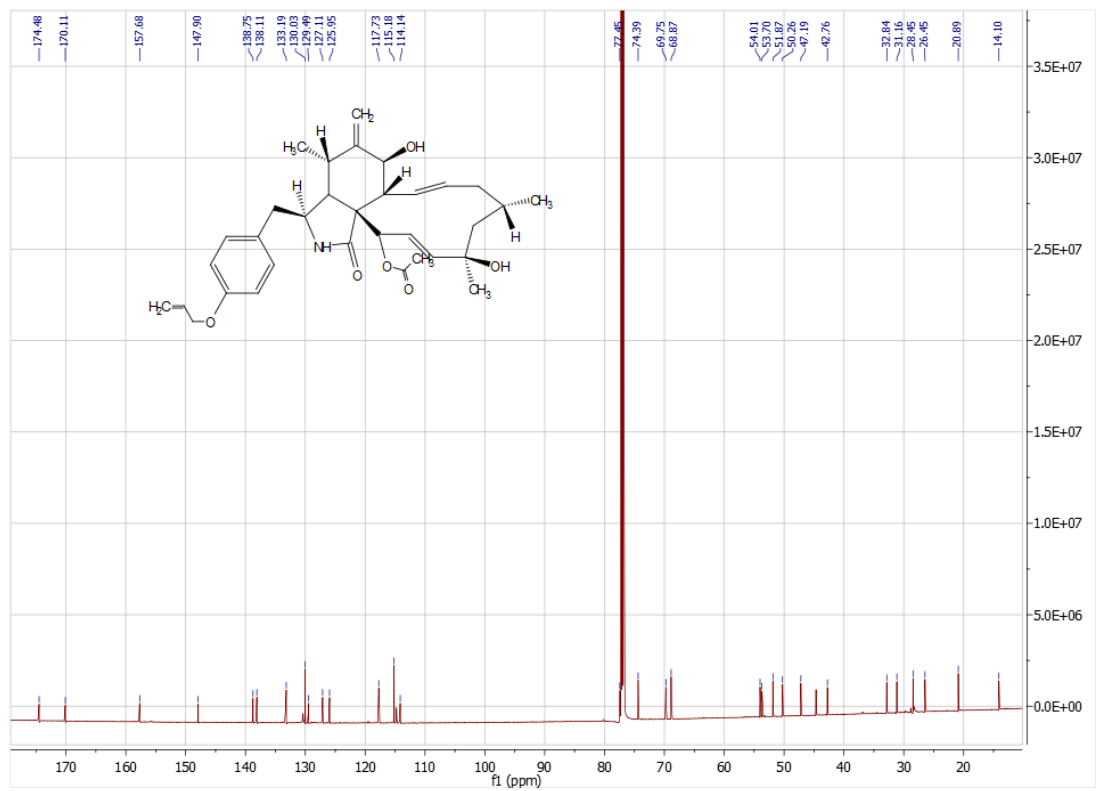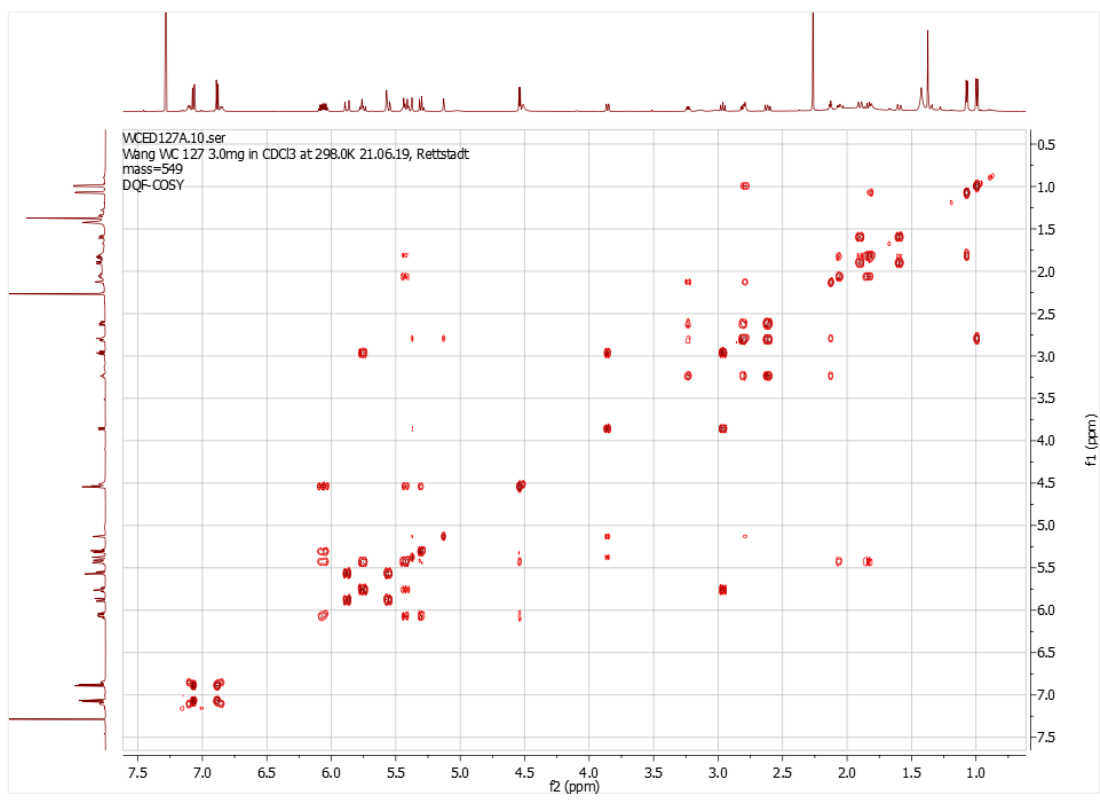

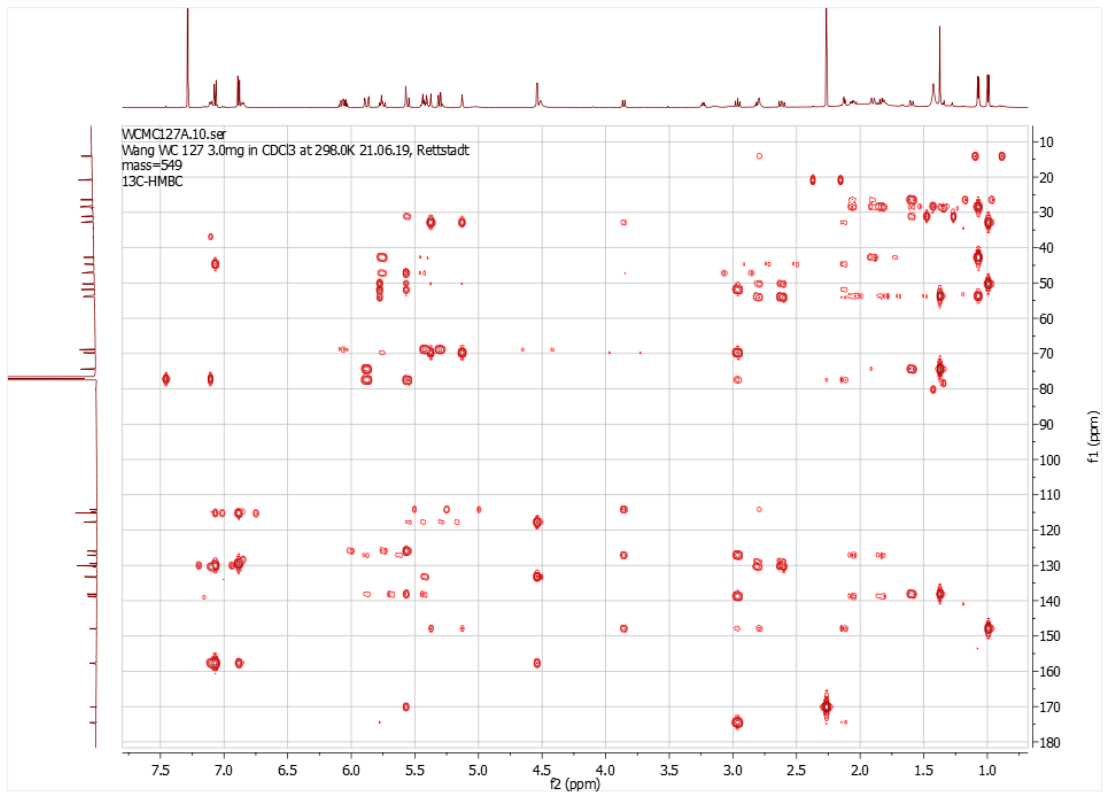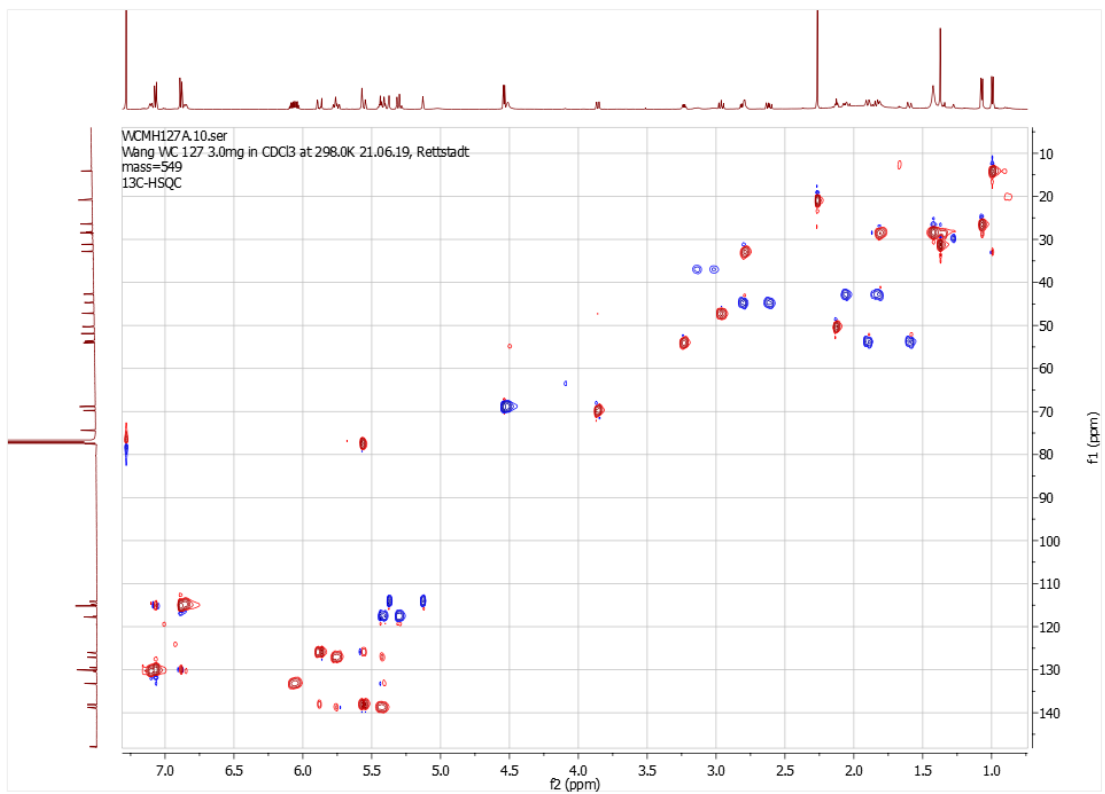



### 1.11 4'-(O-propargyl) Cytochalasin H 1g

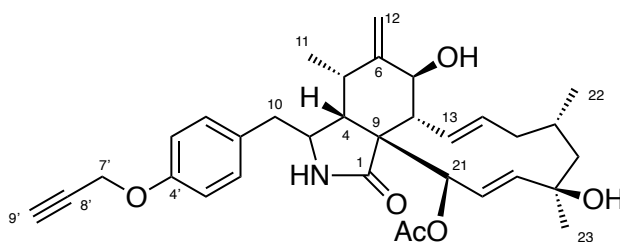

Chemical Formula: C<sub>33</sub>H<sub>41</sub>NO<sub>6</sub>  
Exact Mass: 547.2934

| Position | $\delta_H$ | M   | $J_{H-H}/\text{Hz}$ | $\delta_C$ | HSQC            | HMBC H to C          | H-H COSY  |
|----------|------------|-----|---------------------|------------|-----------------|----------------------|-----------|
| 1        | -          | -   | -                   | 174.2      | -               | -                    | -         |
| 2        | 5.50       | brs | -                   | -          | -               | -                    | -         |
| 3        | 3.24       | ddd | 1.1, 5.0, 9.6       | 53.8       | CH              | 1', 1, 4, 5          | 4, 5, 10  |
| 4        | 2.13       | dd  | 3.8, 5.0            | 50.5       | CH              | 1, 3, 5, 6, 10, 21   | 3, 5, 10  |
| 5        | 2.80       | m   | -                   | 32.9       | CH              | 1', 3                | 4, 11, 12 |
| 6        | -          | -   | -                   | 147.8      | -               | -                    | -         |
| 7        | 3.85       | dd  | 1.6, 10.7           | 69.6       | CH              | 6, 12                | 8, 12     |
| 8        | 2.96       | t   | 10.7                | 47.2       | CH              | 7, 9, 13, 20, 21     | 7, 13     |
| 9        | -          | -   | -                   | 51.8       | -               | -                    | -         |
| 10a      | 2.61       | dd  | 9.4, 13.6           | 44.8       | CH <sub>2</sub> | 1', 3                | 3, 4, 12  |
| 10b      | 2.82       | dd  | 4.9, 13.6           | -          | -               | -                    | -         |
| 11       | 1.03       | d   | 6.7                 | 14.1       | CH <sub>3</sub> | 4, 5, 6              | 5         |
| 12a      | 5.13       | brs | -                   | 114.2      | CH <sub>2</sub> | 5, 6, 7              | 5, 7, 11  |
| 12b      | 5.37       | brs | -                   | -          | -               | -                    | -         |
| 13       | 5.76       | ddd | 1.4, 9.7, 15.4      | 127.1      | CH              | 7, 8, 15             | 8, 14, 15 |
| 14       | 5.41       | ddd | 4.8, 10.1, 15.4     | 138.8      | CH              | 9, 15                | 13, 15    |
| 15a      | 1.83       | m   | -                   | 42.8       | CH <sub>2</sub> | 13, 14, 16, 17       | 13, 14,   |
| 15b      | 2.05       | m   | -                   | -          | -               | -                    | -         |
| 16       | 1.81       | m   | -                   | 28.5       | CH              | 13, 14, 17           | 22        |
| 17a      | 1.60       | dd  | 3.0, 14.4           | 53.6       | CH <sub>2</sub> | 18, 19               | -         |
| 17b      | 1.82       | dd  | 3.0, 14.4           | -          | -               | -                    | -         |
| 18       | -          | -   | -                   | 74.4       | -               | -                    | -         |
| 19       | 5.54       | dd  | 2.3, 16.2           | 138.2      | CH              | -                    | 20        |
| 20       | 5.89       | dd  | 3.0, 16.2           | 126.0      | CH              | 18, 19               | 19        |
| 21       | 5.58       | dd  | 2.6, 3.0            | 77.5       | CH              | 8, 9, 19, 20, 21, 23 | -         |
| 22       | 1.07       | d   | 6.3                 | 26.4       | CH <sub>3</sub> | 15, 16, 17           | 16        |
| 23       | 1.37       | s   | -                   | 31.2       | CH <sub>3</sub> | 17, 18, 19           | -         |
| 1'       | -          | -   | -                   | 130.4      | -               | -                    | -         |
| 2' 6'    | 7.09       | d   | 8.3                 | 130.2      | 2 x CH          | 3', 4', 5', 10       | 3', 5'    |
| 3' 5'    | 6.96       | d   | 8.3                 | 115.4      | 2 x CH          | 1', 4'               | 2', 6'    |
| 4'       | -          | -   | -                   | 156.7      | -               | -                    | -         |
| 24       | -          | -   | -                   | 170.2      | -               | -                    | -         |
| 25       | 2.26       | s   | -                   | 20.9       | CH <sub>3</sub> | 21, 24               | -         |
| 7'       | 4.70       | d   | 2.4                 | 55.9       | CH <sub>2</sub> | 4', 8', 9'           | 9'        |
| 8'       | -          | -   | -                   | 78.5       | -               | -                    | -         |
| 9'       | 2.54       | m   | -                   | 75.9       | CH              | 7', 8'               | 7'        |

Monoisotopic Mass, Odd and Even Electron Ions  
 247 formula(e) evaluated with 10 results within limits (all results (up to 1000) for each mass)  
 Elements Used:  
 C: 20-50 H: 30-100 N: 0-1 O: 0-10 Na: 0-1

Wang Q-ToF Premier UPLC-MS  
 WC 098 716 (7.327) AM (Cen,4, 67.00, Ar,11000.0,556.28,0.55,LS 5)

22-May-201908:26:10  
 1: TOF MS ES+  
 240

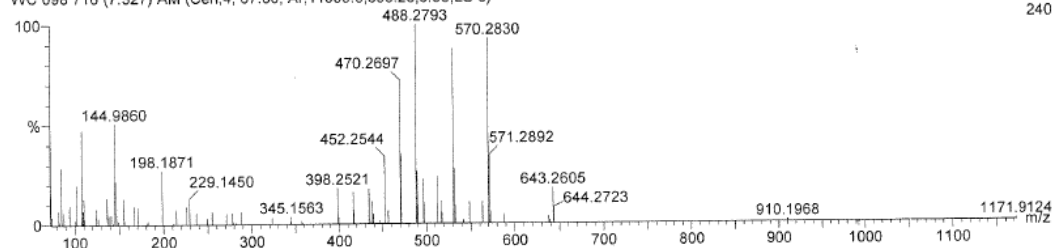

Minimum: -0.5  
 Maximum: 5.0 20.0 60.0

| Mass     | Calc. Mass | mDa  | PPM   | DBE  | i-FIT | Formula                     |
|----------|------------|------|-------|------|-------|-----------------------------|
| 570.2830 | 570.2829   | 0.1  | 0.2   | 12.0 | 0.6   | C32 H42 O9                  |
|          | 570.2832   | -0.2 | -0.4  | 13.5 | 0.5   | C33 H41 N O <sup>-</sup> Na |
|          | 570.2805   | 2.5  | 4.4   | 9.0  | 0.4   | C30 H43 O9 Na               |
|          | 570.2856   | -2.6 | -4.6  | 16.5 | 1.2   | C35 H40 N O <sup>6-</sup>   |
|          | 570.2797   | 3.3  | 5.8   | 25.5 | 4.7   | C42 H36 N O                 |
|          | 570.2773   | 5.7  | 10.0  | 22.5 | 3.2   | C40 H37 N O Na              |
|          | 570.2770   | 6.0  | 10.5  | 21.0 | 3.0   | C39 H38 O4                  |
|          | 570.2899   | -6.9 | -12.1 | 22.0 | 3.7   | C41 H39 O Na                |
|          | 570.2746   | 8.4  | 14.7  | 18.0 | 1.9   | C37 H39 O4 Na               |
|          | 570.2923   | -9.3 | -16.3 | 25.0 | 5.5   | C43 H38 O                   |

HRMS ( $m/z$ ): calculated for  $[C_{33}H_{41}NO_6 + Na]$ : 570.2832, found: 570.2830.

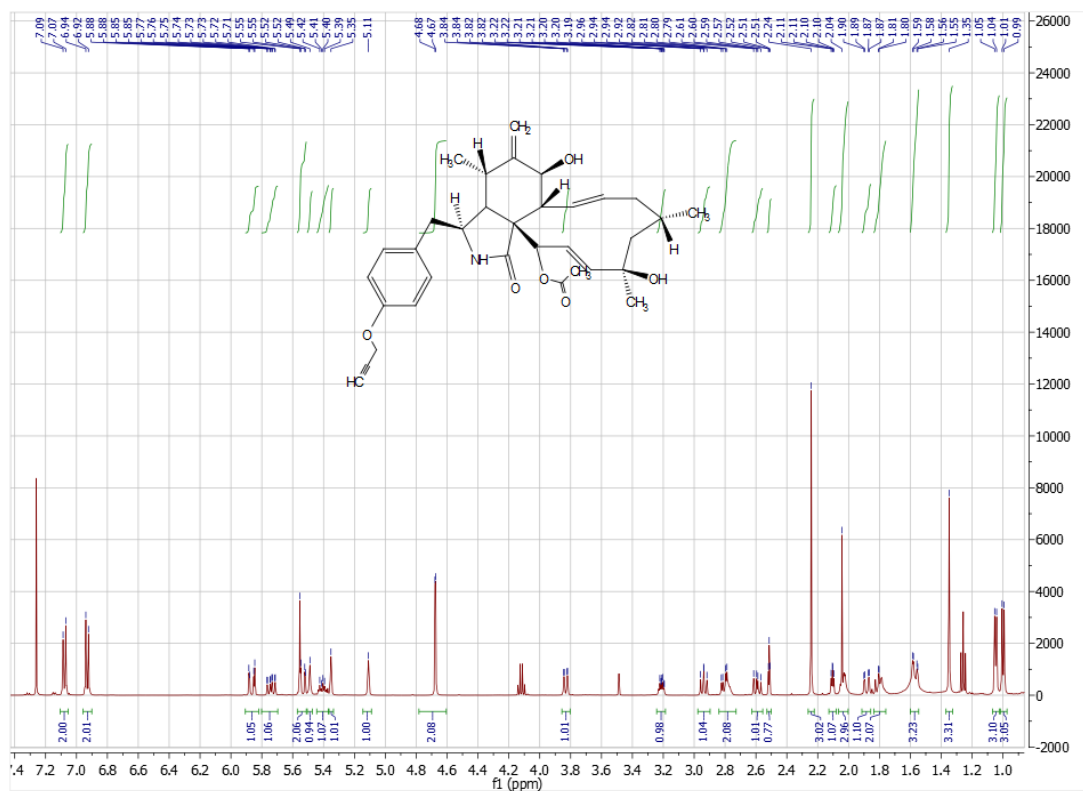

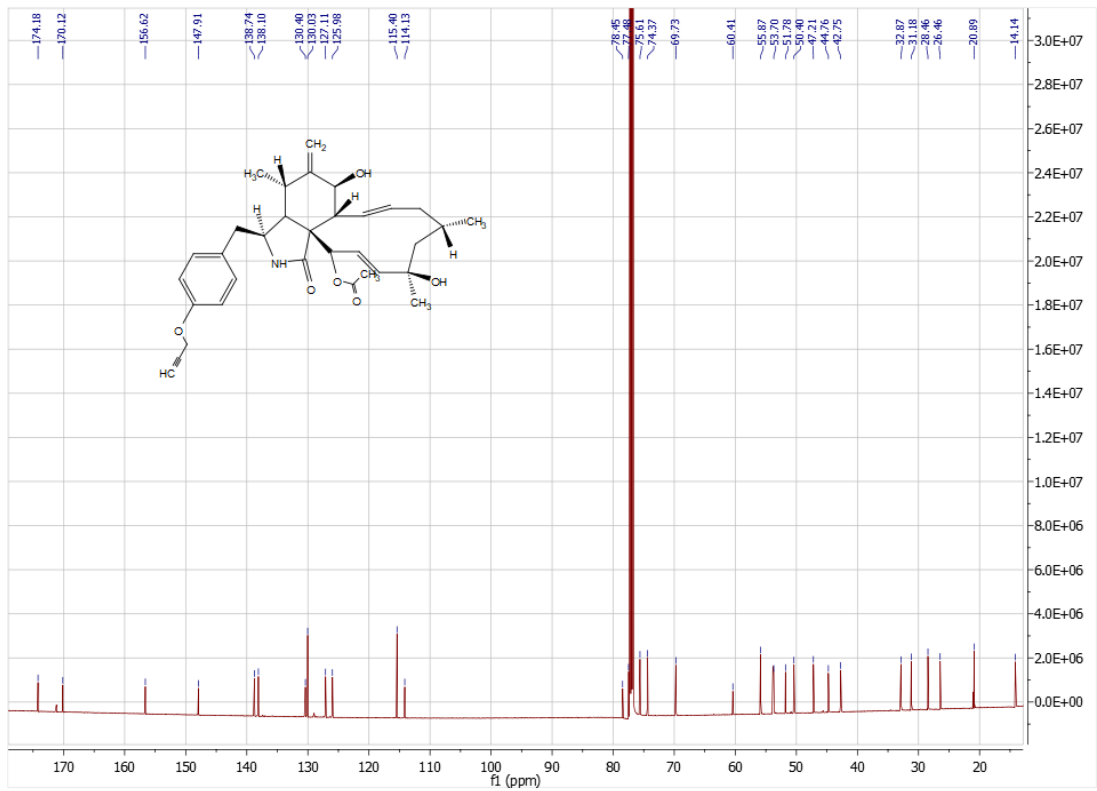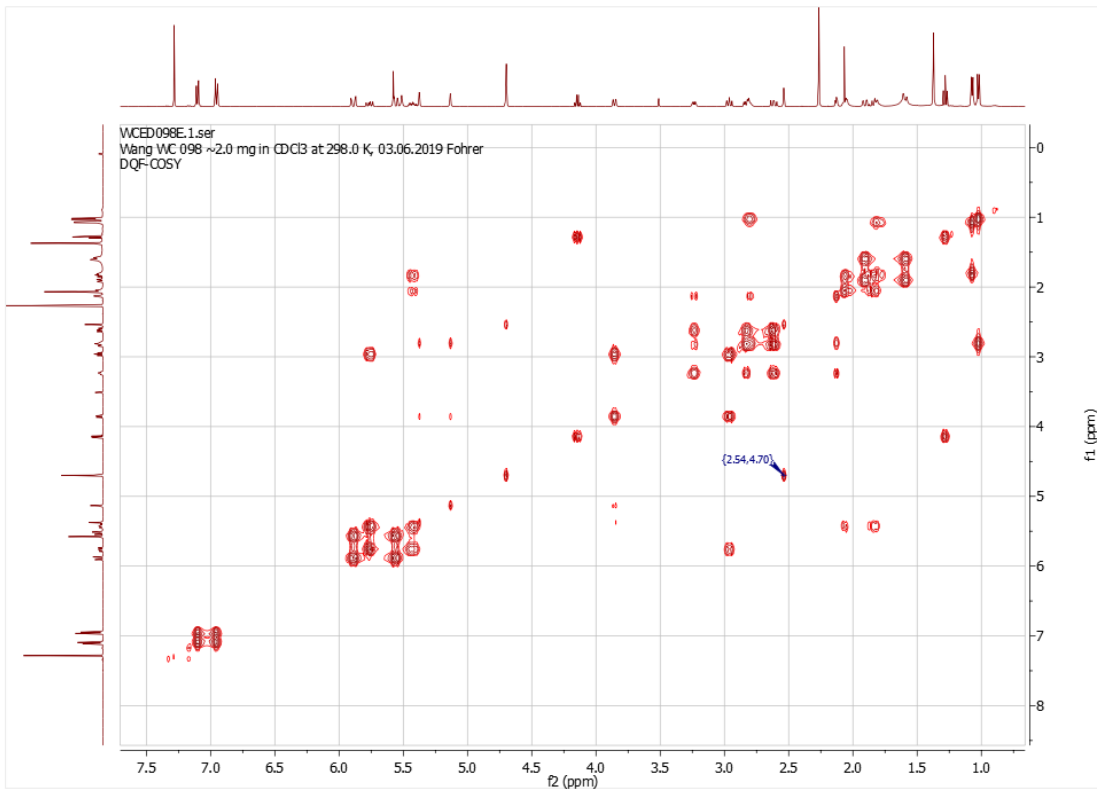

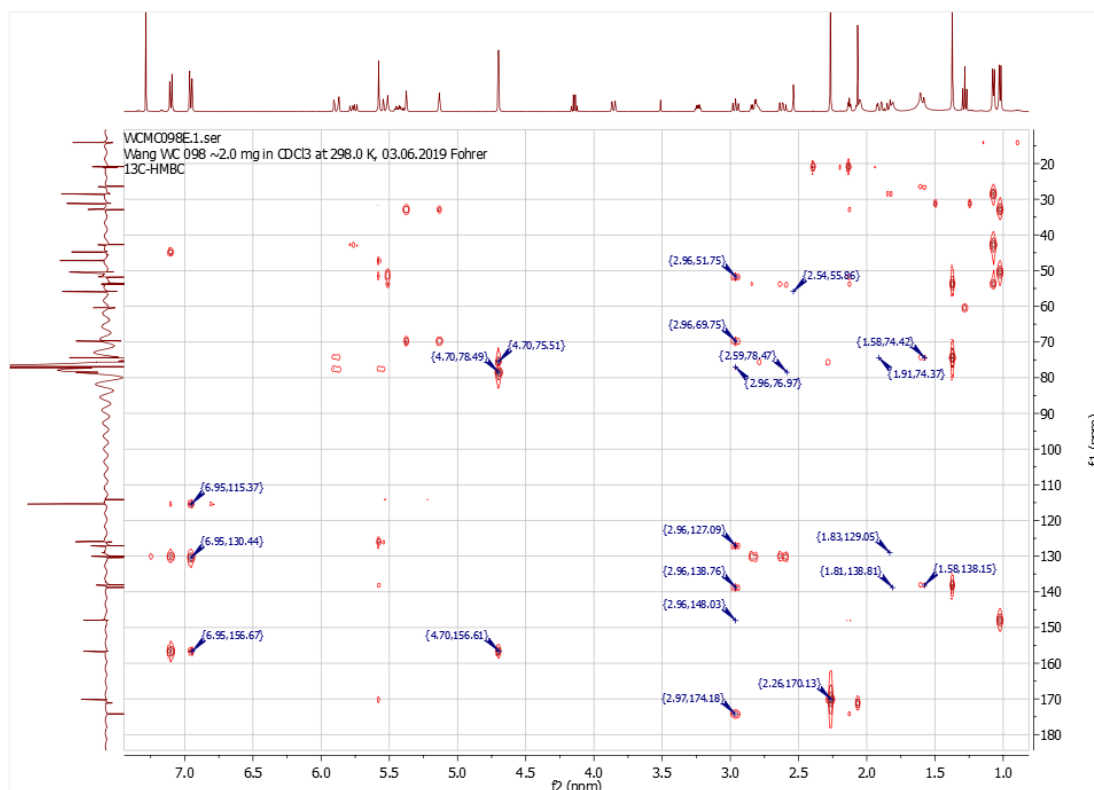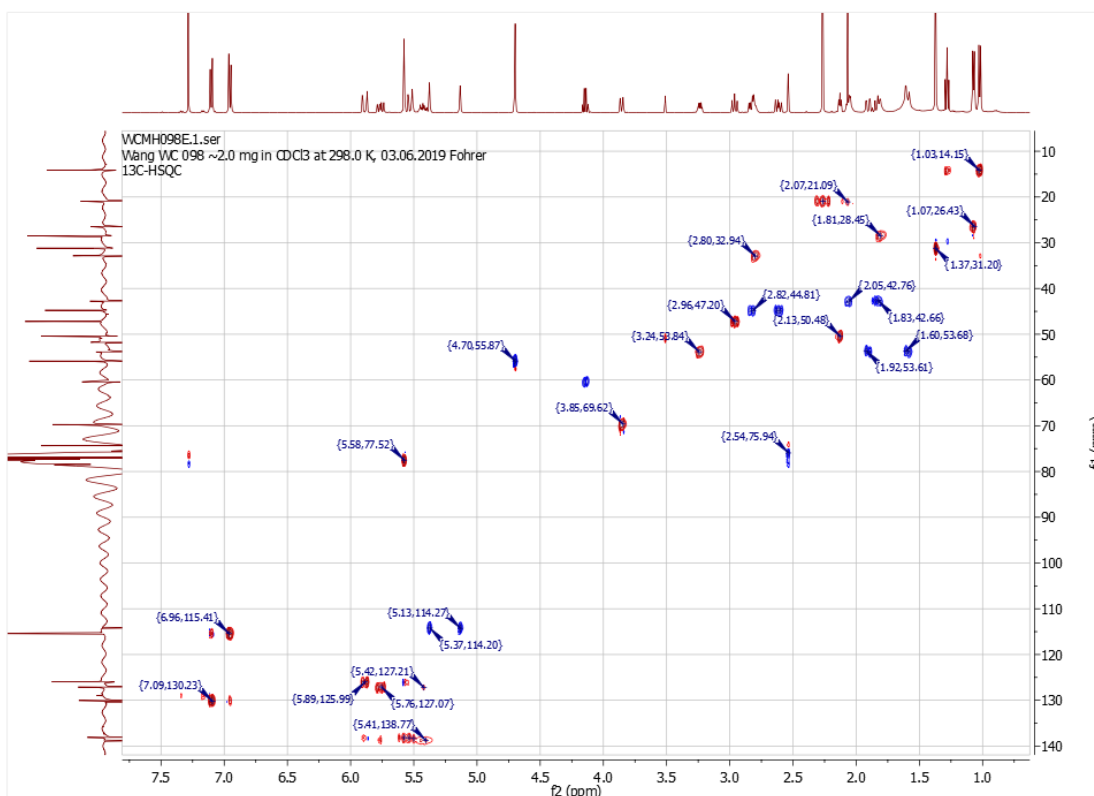

## 1.12 4'-Azido Cytochalasin H 1h

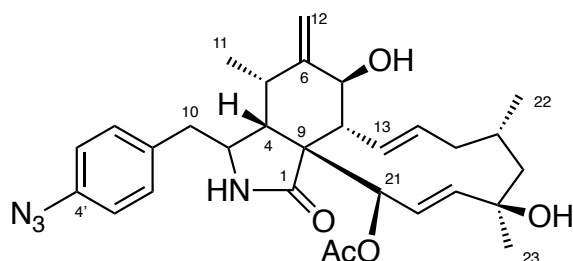

Chemical Formula:  $C_{30}H_{38}N_4O_5$   
Exact Mass: 534.2842

| Position | $\delta_H$ | M   | $J_{H-H}/\text{Hz}$ | $\delta_C$ | HSQC            | HMBC H to C        | H-H COSY  |
|----------|------------|-----|---------------------|------------|-----------------|--------------------|-----------|
| 1        | -          | -   | -                   | 174.2      | -               | -                  | -         |
| 2        | 5.47       | brs | -                   | -          | -               | -                  | -         |
| 3        | 3.22       | ddd | 1.1, 5.0, 9.6       | 53.7       | CH              | 1', 1, 4, 5        | 4, 5, 10  |
| 4        | 2.11       | dd  | 3.8, 5.0            | 50.3       | CH              | 1, 3, 5, 6, 10, 21 | 3, 5, 10  |
| 5        | 2.77       | m   | -                   | 32.8       | CH              | 1', 3              | 4, 11, 12 |
| 6        | -          | -   | -                   | 147.7      | -               | -                  | -         |
| 7        | 3.84       | dd  | 1.4, 10.2           | 69.8       | CH              | 5, 6, 8, 12, 13    | 8, 12     |
| 8        | 2.93       | t   | 10.2                | 47.3       | CH              | 7, 9, 13, 20, 21   | 7, 13     |
| 9        | -          | -   | -                   | 51.6       | -               | -                  | -         |
| 10a      | 2.65       | dd  | 9.3, 13.6           | 44.9       | CH <sub>2</sub> | 1', 3              | 3, 4, 12  |
| 10b      | 2.84       | dd  | 4.9, 13.6           | -          | -               | -                  | -         |
| 11       | 0.96       | d   | 6.7                 | 14.1       | CH <sub>3</sub> | 4, 5, 6            | 5         |
| 12a      | 5.10       | brs | -                   | 114.2      | CH <sub>2</sub> | 5, 6, 7            | 5, 7, 11  |
| 12b      | 5.35       | brs | -                   | -          | -               | -                  | -         |
| 13       | 5.74       | ddd | 1.4, 9.7, 15.5      | 127.1      | CH              | 7, 8, 15           | 8, 14, 15 |
| 14       | 5.42       | ddd | 4.8, 10.2, 15.5     | 138.7      | CH              | 9, 15              | 13, 15    |
| 15a      | 1.82       | m   | -                   | 42.8       | CH <sub>2</sub> | 13, 14, 16, 17     | 13, 14,   |
| 15b      | 2.04       | m   | -                   | -          | -               | -                  | -         |
| 16       | 1.79       | m   | -                   | 28.6       | CH              | 13, 14, 17         | 22        |
| 17a      | 1.58       | dd  | 3.1, 14.3           | 53.9       | CH <sub>2</sub> | 18, 19             | -         |
| 17b      | 1.87       | dd  | 3.2, 14.3           | -          | -               | -                  | -         |
| 18       | -          | -   | -                   | 74.3       | -               | -                  | -         |
| 19       | 5.56       | dd  | 3.8, 15.2           | 138.1      | CH              | -                  | 20        |
| 20       | 5.83       | m   | -                   | 125.8      | CH              | 9, 18, 19          | 19        |
| 21       | 5.55       | brs | -                   | 77.3       | CH              | 19, 20, 24         | -         |
| 22       | 1.05       | d   | 6.4                 | 26.6       | CH <sub>3</sub> | 15, 16, 17         | 16        |
| 23       | 1.35       | s   | -                   | 31.3       | CH <sub>3</sub> | 17, 18, 19         | -         |
| 1'       | -          | -   | -                   | 133.8      | -               | -                  | -         |
| 2' 6'    | 7.14       | d   | 8.4                 | 130.4      | 2 x CH          | 3', 4', 5', 10     | 3', 5'    |
| 3' 5'    | 6.99       | d   | 8.4                 | 119.1      | 2 x CH          | 1', 4'             | 2', 6'    |
| 4'       | -          | -   | -                   | 138.9      | -               | -                  | -         |
| 24       | -          | -   | -                   | 170.2      | -               | -                  | -         |
| 25       | 2.25       | s   | -                   | 21.0       | CH <sub>3</sub> | 21, 24             | -         |

Monoisotopic Mass, Even Electron Ions  
 672 formula(e) evaluated with 15 results within limits (all results (up to 1000) for each mass)  
 Elements Used:

C: 0-65 H: 0-80 N: 0-4 O: 0-10 Na: 0-1

Wang Q-ToF Premier UPLC-MS  
 WC 075 321 (3.292) AM (Cen,4, 90.00, Ar,11000.0,556.28,0,55,LS 5)

11-Apr-2019 10:59:13  
 1: TOF MS ES+  
 468

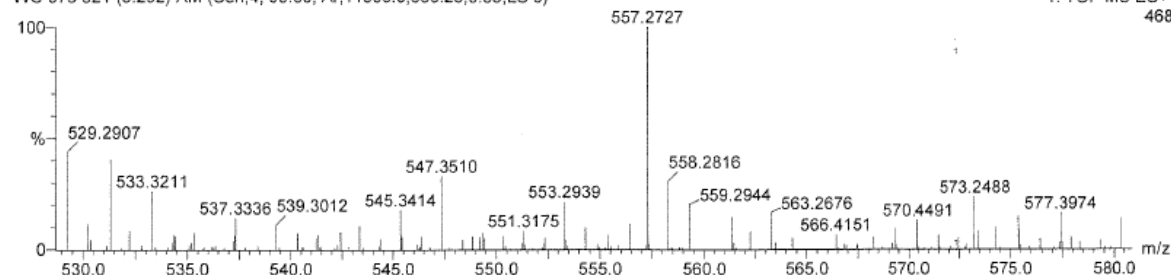

Minimum: -0.5  
 Maximum: 5.0 20.0 60.0

| Mass     | Calc. Mass | mDa  | PPM  | DBE  | i-FIT | Formula            |
|----------|------------|------|------|------|-------|--------------------|
| 557.2727 | 557.2727   | 0.0  | 0.0  | 8.5  | 20.4  | C29 H42 O9 Na      |
|          | 557.2740   | -1.3 | -2.3 | 13.5 | 21.8  | C30 H38 N4 O5 · Na |
|          | 557.2705   | 2.2  | 3.9  | 25.5 | 25.3  | C39 H33 N4         |

HRMS ( $m/z$ ): calculated for  $[C_{30}H_{38}N_4O_5 + Na]$ : 557.2727, found: 557.2727.

IR (powder,  $cm^{-1}$ ): 3388, 2920, 2112, 1685, 1506, 1369, 1280, 1226, 1045, 1014, 962, 534.

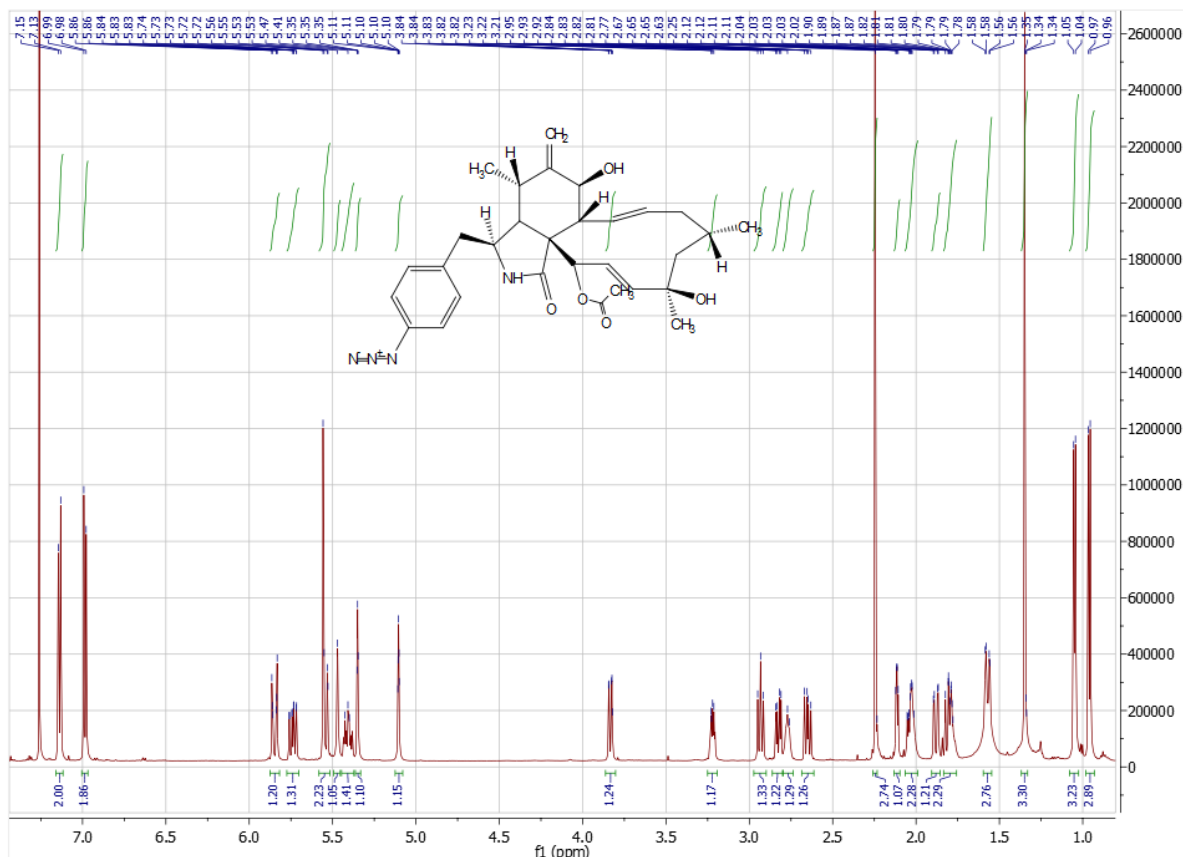

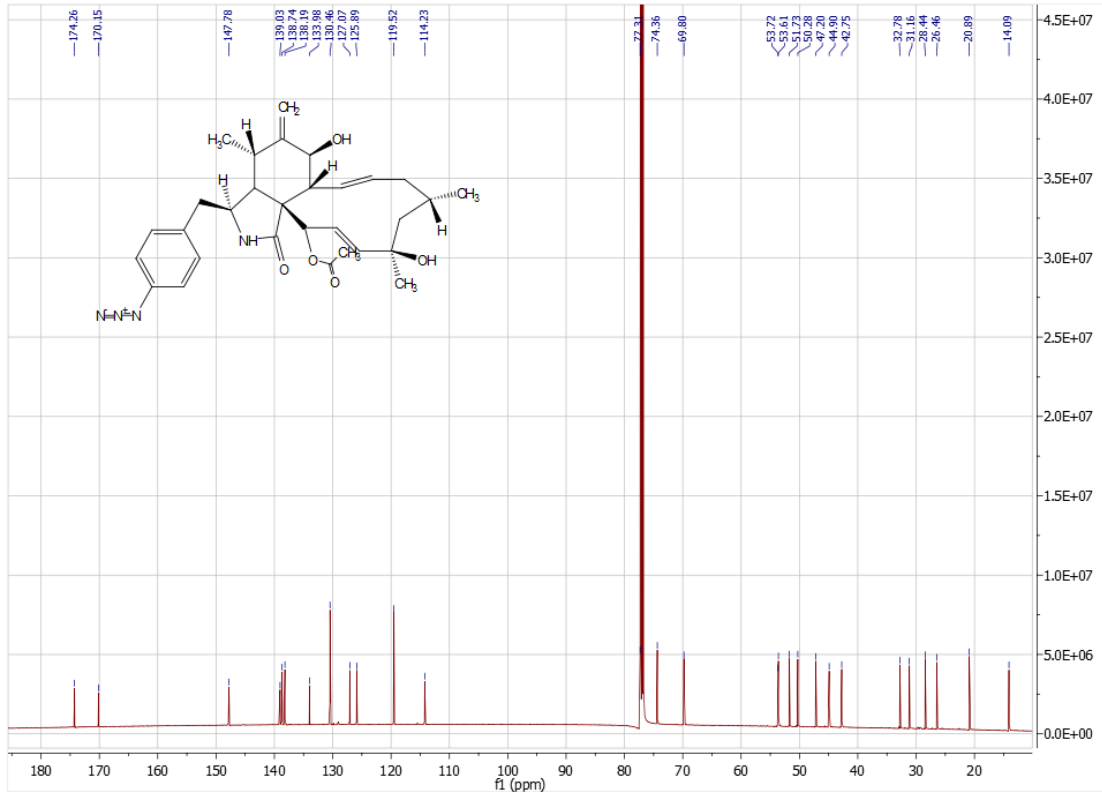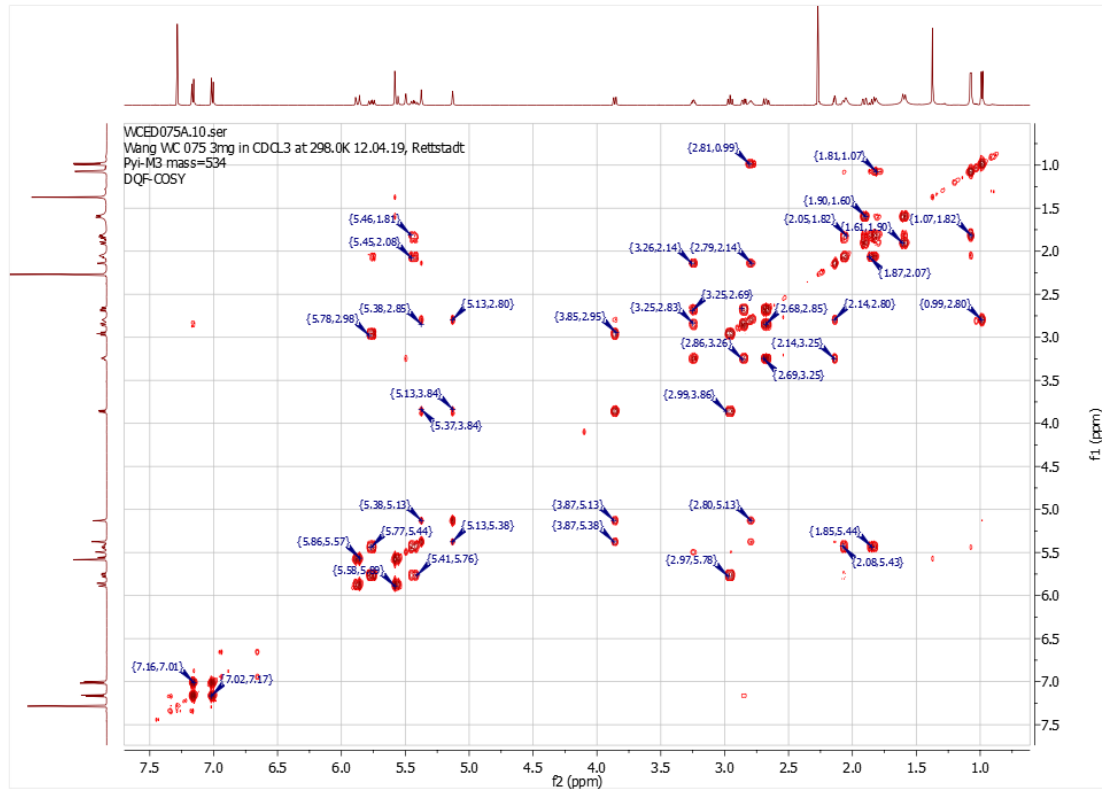

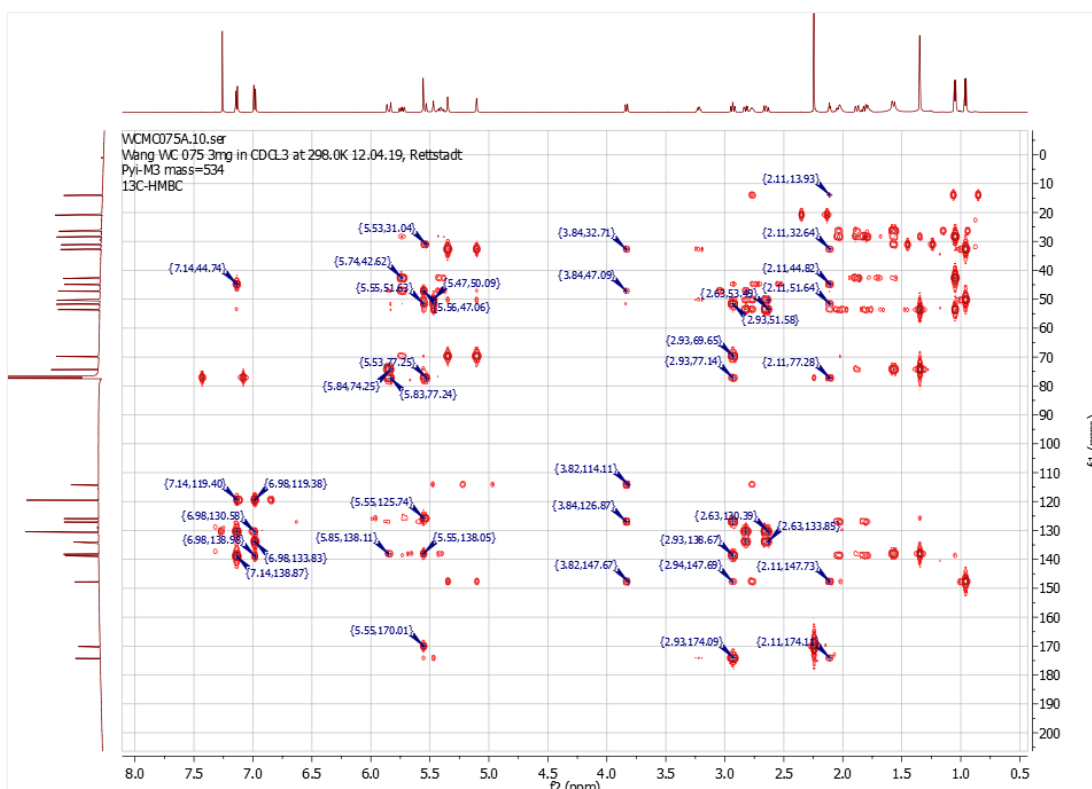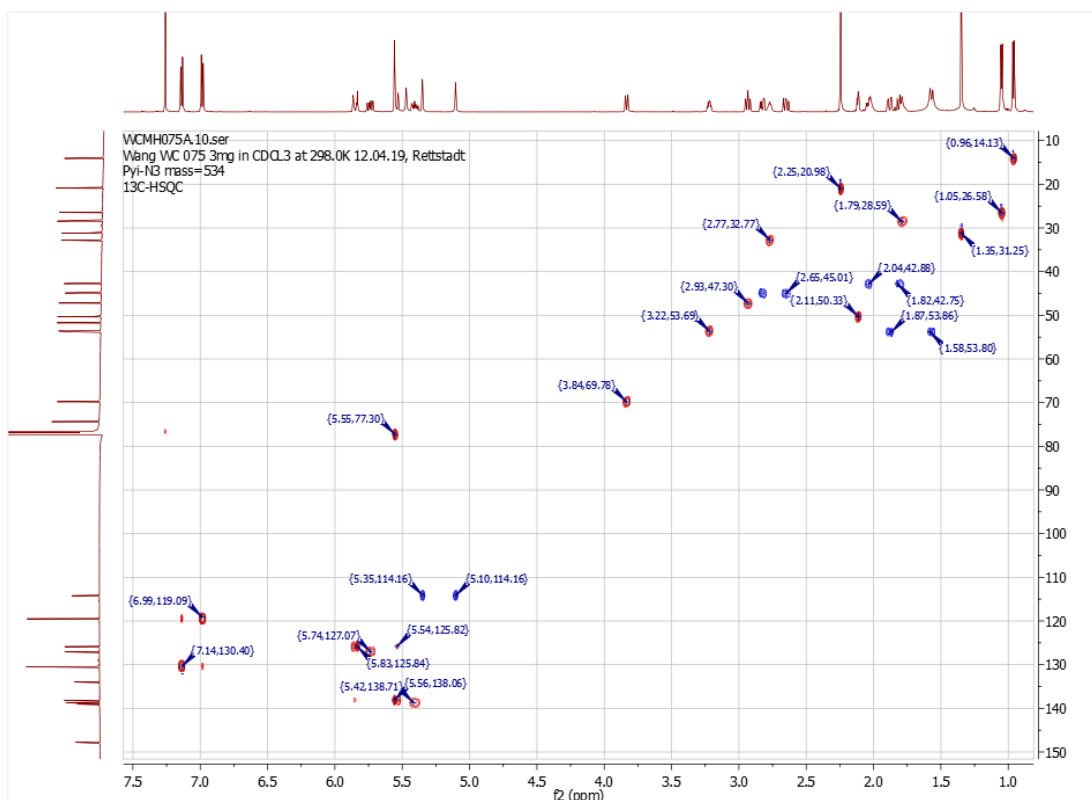



## 2.0 Synthetic Procedures and Characterisation

### 2.01 4'-Amino Cytochalasin H 1i

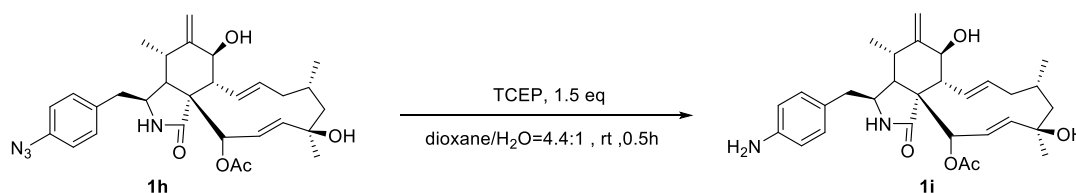

To a stirred solution of **1h** (10 mg, 0.019 mmol, 1.0 eq) in 2.0 mL dioxane-water mixture (4.4:1, v/v) was added TCEP (7.0mg, 0.028 mmol, 1.5 eq). The mixture was stirred at room temperature for 1 hour and the solvent was removed *in vacuo*. The residue was dissolved in EtOAc (2 mL) and washed with water (2 mL x 2). The organic phase was dried over MgSO<sub>4</sub>, filtered and evaporated to dryness *in vacuo*. The residue was dissolved in MeOH and purified by LCMS to afford 6.7 mg of desired product (70.2%, 0.013 mmol) as a white solid.

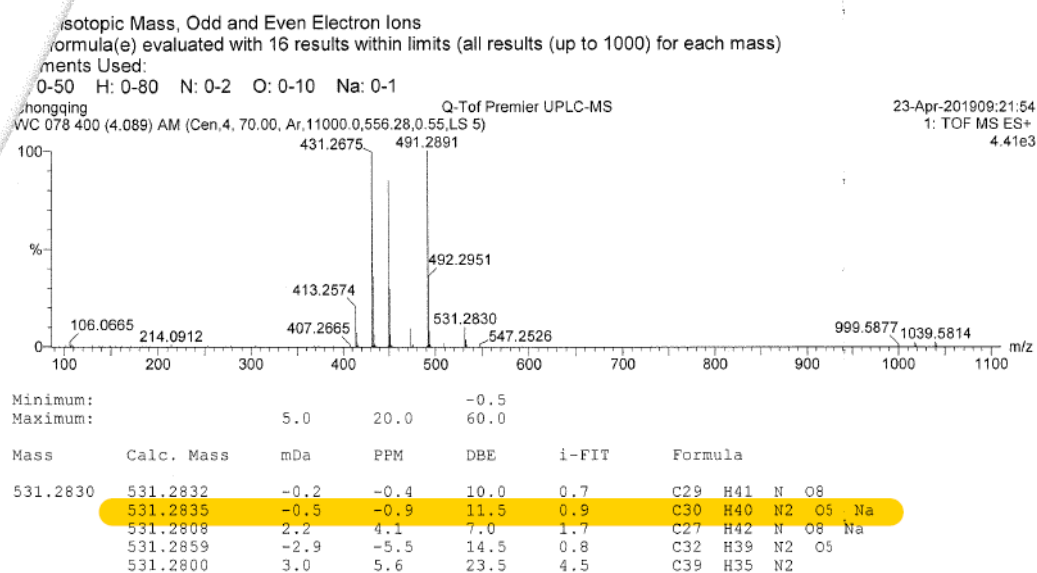

HRMS ( $m/z$ ): calculated for [C<sub>60</sub>H<sub>76</sub>N<sub>2</sub>O<sub>10</sub> + Na]: 531.2835, found: 531.2830.



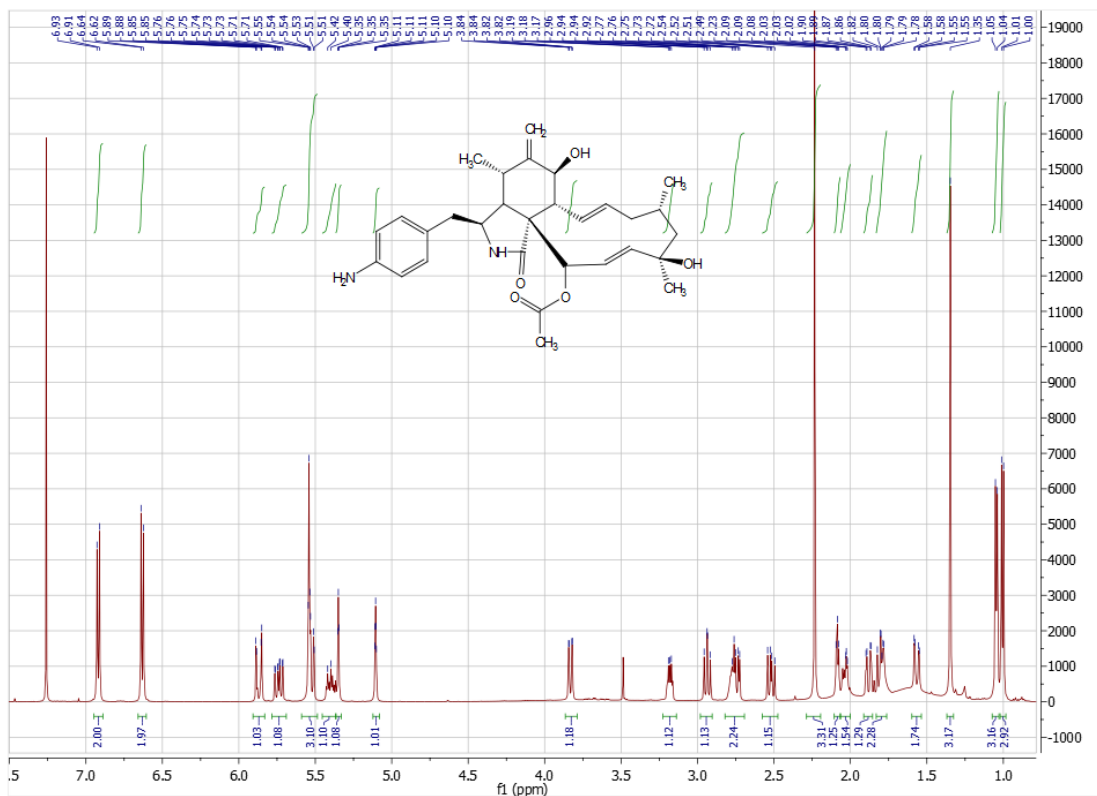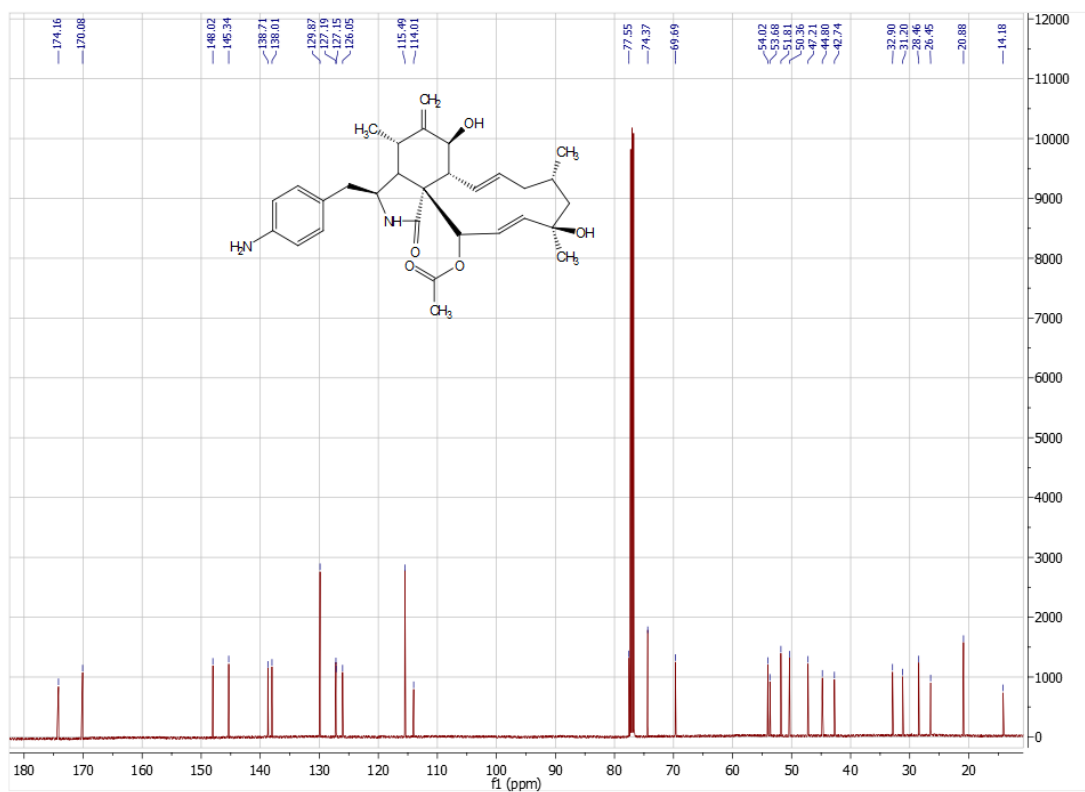

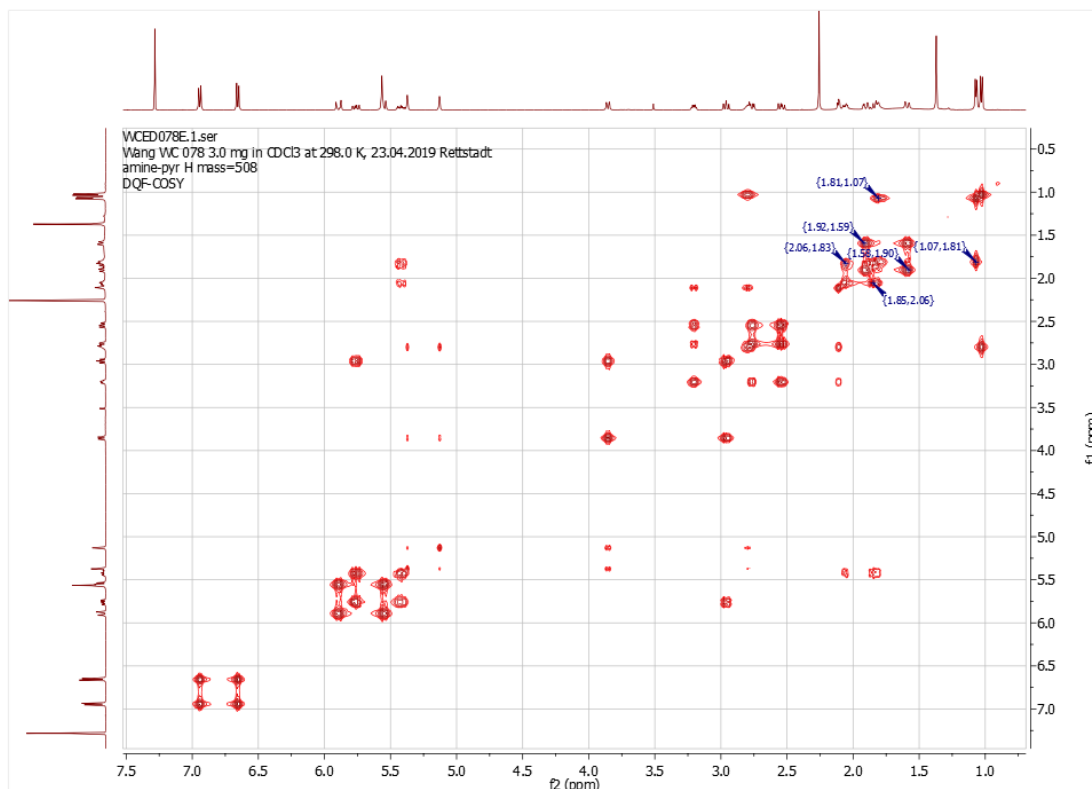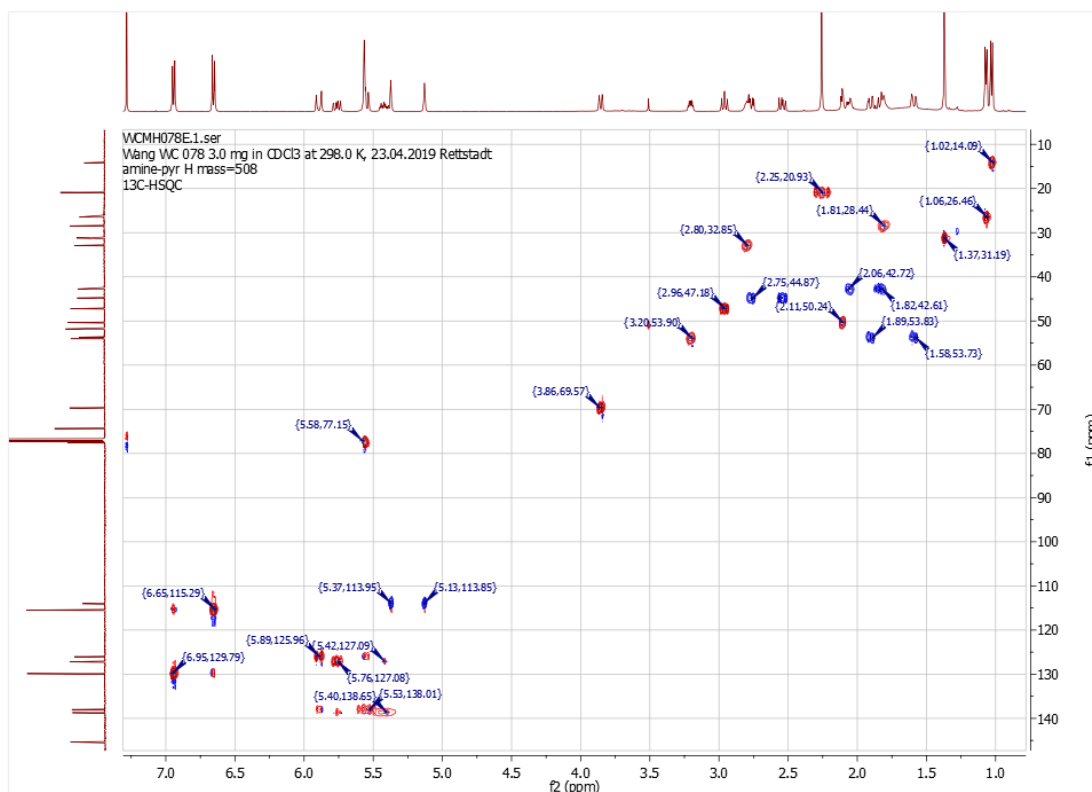

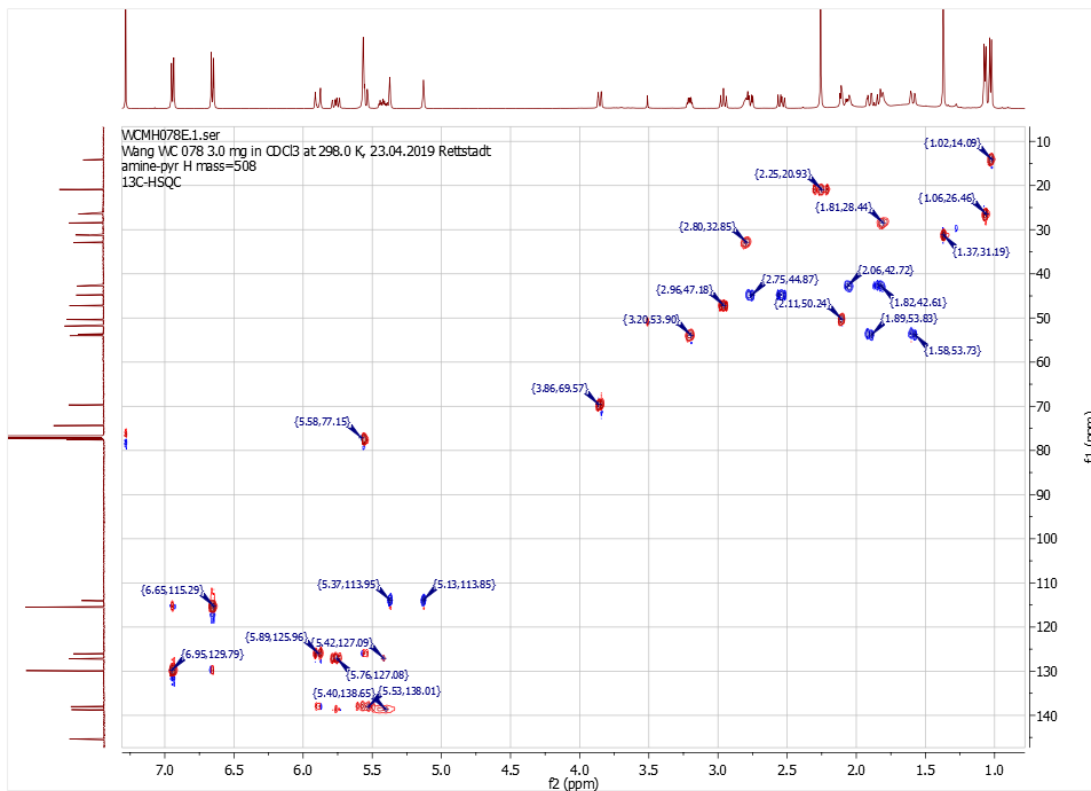

## 2.02 4'-(1-(4-methyltriazolyl)) Cytochalasin H 5a

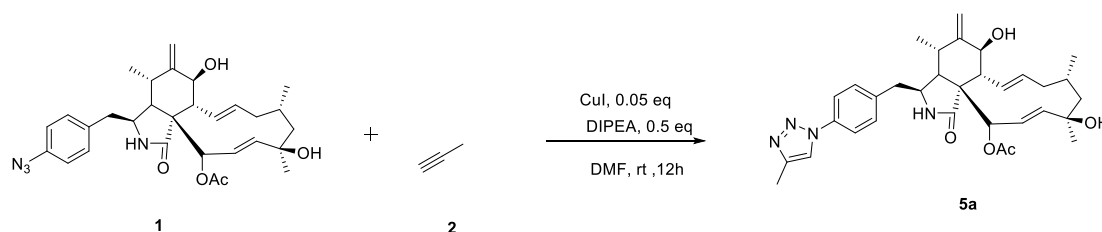

To a stirred solution of **1h** (10 mg, 0.019 mmol, 1.0 eq) and propyne (2.0 mg, 0.038 mmol, 2.0 eq, purchased from Acros) in DMF (2 mL) was added CuI (0.2 mg, 0.95  $\mu\text{mol}$ , 0.05 eq) and DIPEA (1.2 mg, 9.5  $\mu\text{mol}$ , 0.5 eq). The mixture was stirred at room temperature for 12 hours under nitrogen and the solvent was removed *in vacuo*. The residue was dissolved in EtOAc (2 mL) and washed with water (2 mL  $\times$  2). The organic phase was dried over  $\text{MgSO}_4$ , filtered and evaporated to dryness *in vacuo*. The residue was dissolved in MeOH and purified by LCMS to afford 8.2 mg of desired product **5a** (76.4%, 0.014 mmol) as a white solid.

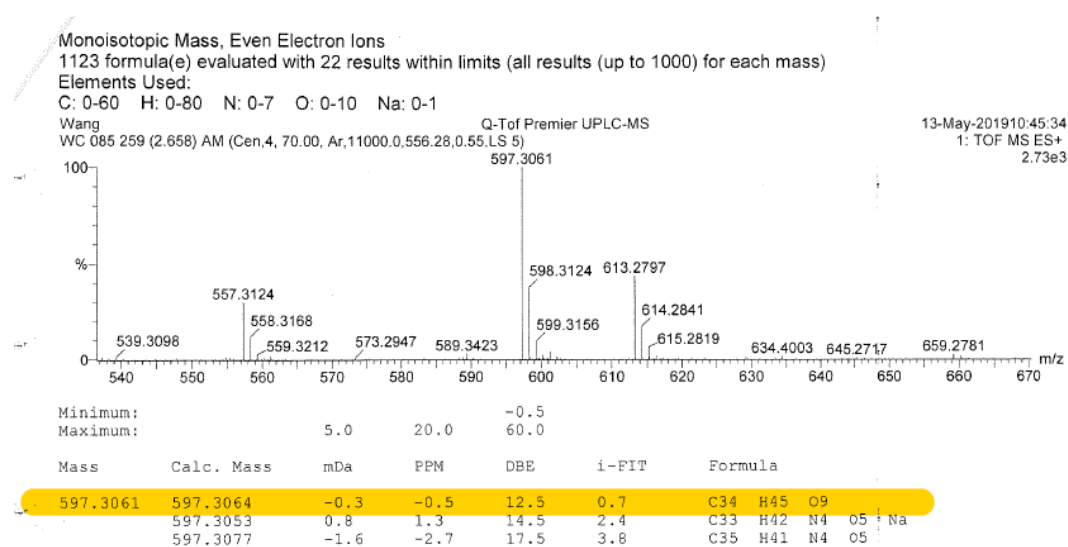

HRMS ( $m/z$ ): calculated for  $[\text{C}_{60}\text{H}_{76}\text{N}_2\text{O}_{10} + \text{Na}]$ : 597.3053, found: 597.3061.

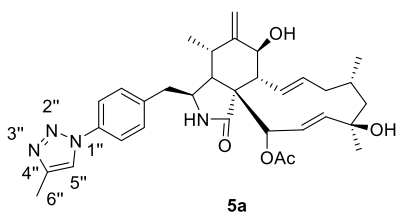

Chemical Formula: C<sub>33</sub>H<sub>42</sub>N<sub>4</sub>O<sub>5</sub>  
Exact Mass: 574.3155

| Position | $\delta_H$ | M   | $J_{H-H}/\text{Hz}$ | $\delta_C$ | HSQC            | HMBC H to C      | H-H COSY  |
|----------|------------|-----|---------------------|------------|-----------------|------------------|-----------|
| 1        | -          | -   | -                   | 174.3      | -               | -                | -         |
| 2        | 5.56       | brs | -                   | -          | -               | -                | -         |
| 3        | 3.31       | m   | -                   | 53.5       | CH              | 1', 1, 4, 5      | 4, 5, 10  |
| 4        | 2.18       | dd  | 3.8, 5.0            | 50.2       | CH              | 1, 3, 5, 6, 10   | 3, 5, 10  |
| 5        | 2.80       | m   | -                   | 32.7       | CH              | 1', 3            | 4, 11, 12 |
| 6        | -          | -   | -                   | 147.7      | -               | -                | -         |
| 7        | 3.87       | dd  | 1.3, 10.8           | 70.0       | CH              | 6, 12            | 8, 12     |
| 8        | 2.96       | m   | -                   | 47.3       | CH              | 7, 9, 13, 20, 21 | 7, 13     |
| 9        | -          | -   | -                   | 51.7       | -               | -                | -         |
| 10a      | 2.77       | m   | -                   | 45.1       | CH <sub>2</sub> | 1', 3            | 3, 4, 12  |
| 10b      | 2.95       | m   | -                   | -          | -               | -                | -         |
| 11       | 1.00       | d   | 6.7                 | 14.1       | CH <sub>3</sub> | 4, 5, 6          | 5         |
| 12a      | 5.14       | brs | -                   | 114.4      | CH <sub>2</sub> | 5, 6, 7          | 5, 7, 11  |
| 12b      | 5.38       | brs | -                   | -          | -               | -                | -         |
| 13       | 5.78       | ddd | 1.4, 9.7, 15.4      | 127.0      | CH              | 7, 8, 15         | 8, 14, 15 |
| 14       | 5.43       | ddd | 4.8, 10.1, 15.4     | 138.8      | CH              | 9, 15            | 13, 15    |
| 15a      | 1.83       | m   | -                   | 42.7       | CH <sub>2</sub> | 13, 14, 16, 17   | 13, 14,   |
| 15b      | 2.06       | m   | -                   | -          | -               | -                | -         |
| 16       | 1.81       | m   | -                   | 28.6       | CH              | 13, 14, 17       | 22        |
| 17a      | 1.61       | m   | -                   | 53.8       | CH <sub>2</sub> | 18, 19           | -         |
| 17b      | 1.92       | dd  | 3.0, 14.4           | -          | -               | -                | -         |
| 18       | -          | -   | -                   | 74.3       | -               | -                | -         |
| 19       | 5.59       | brs | -                   | 138.2      | CH              | -                | 20        |
| 20       | 5.85       | dd  | 3.0, 16.2           | 125.9      | CH              | 18, 19           | 19        |
| 21       | 5.58       | brs | -                   | 77.2       | CH              | 8, 9, 19, 20, 23 | -         |
| 22       | 1.07       | d   | 6.5                 | 26.6       | CH <sub>3</sub> | 15, 16, 17       | 16        |
| 23       | 1.37       | s   | -                   | 31.2       | CH <sub>3</sub> | 17, 18, 19       | -         |
| 1'       | -          | -   | -                   | 137.8      | -               | -                | -         |
| 2' 6'    | 7.33       | d   | 8.5                 | 130.4      | 2 x CH          | 3', 4', 5', 10   | 3', 5'    |
| 3' 5'    | 7.70       | d   | 8.5                 | 120.8      | 2 x CH          | 1', 4'           | 2', 6'    |
| 4'       | -          | -   | -                   | 120.9      | -               | -                | -         |
| 24       | -          | -   | -                   | 170.2      | -               | -                | -         |
| 25       | 2.28       | s   | -                   | 21.0       | CH <sub>3</sub> | 24               | -         |
| 4''      | -          | -   | -                   | 144.2      | -               | -                | -         |
| 5''      | 7.73       | s   | -                   | 118.9      | CH              | 4''              | -         |
| 6''      | 2.47       | s   | -                   | 11.0       | CH <sub>3</sub> | 4'', 5''         | -         |

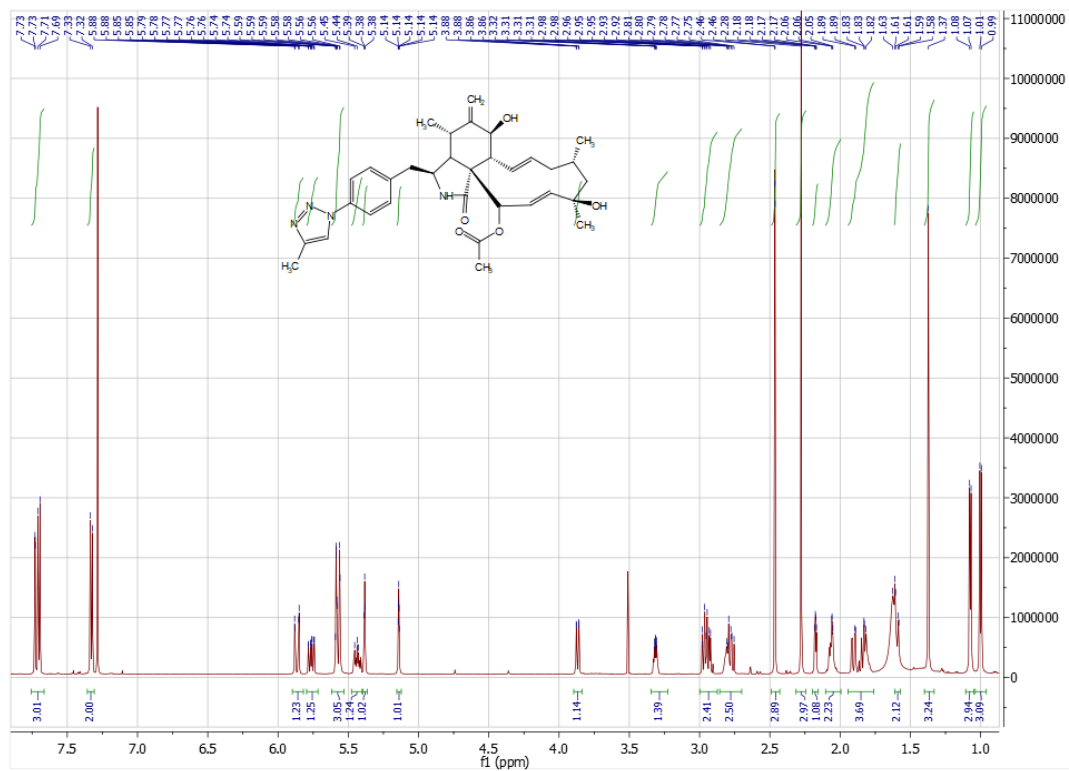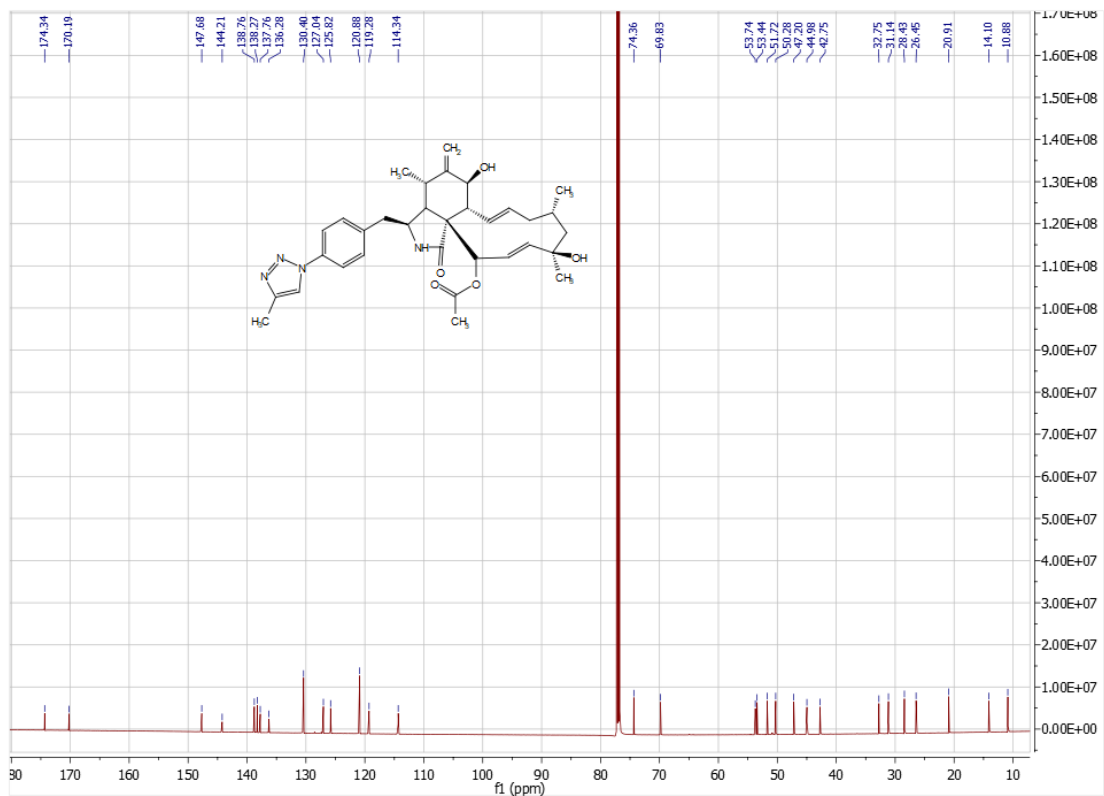



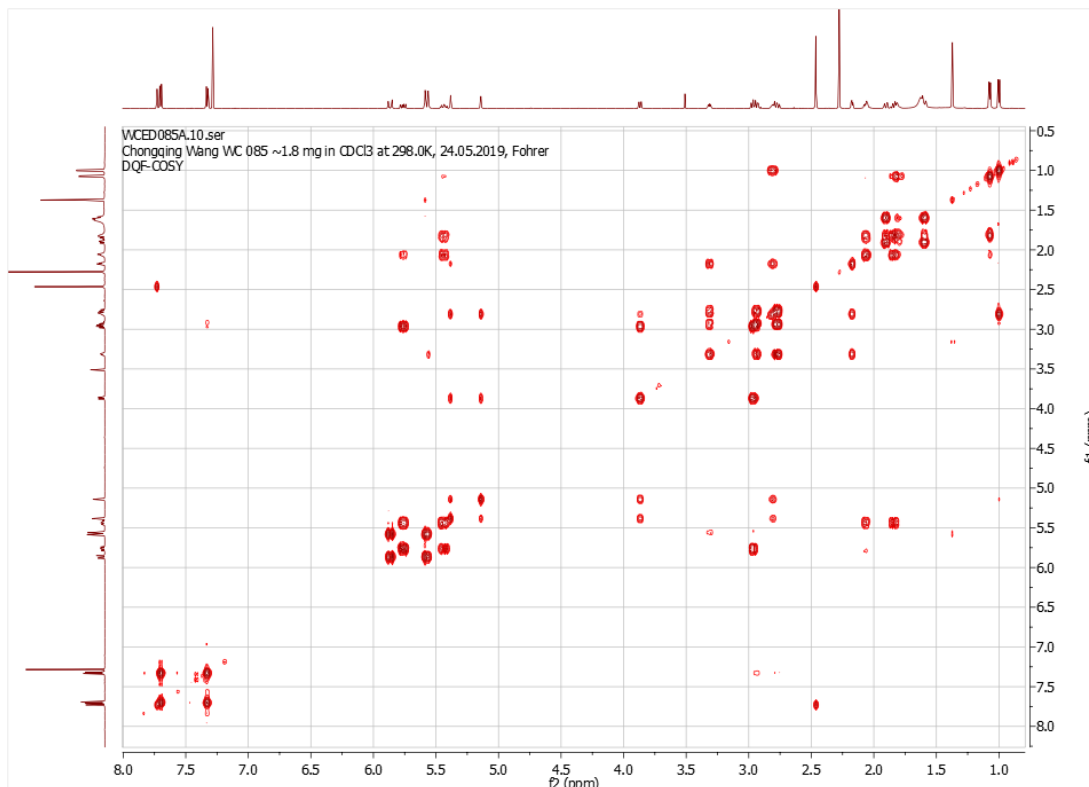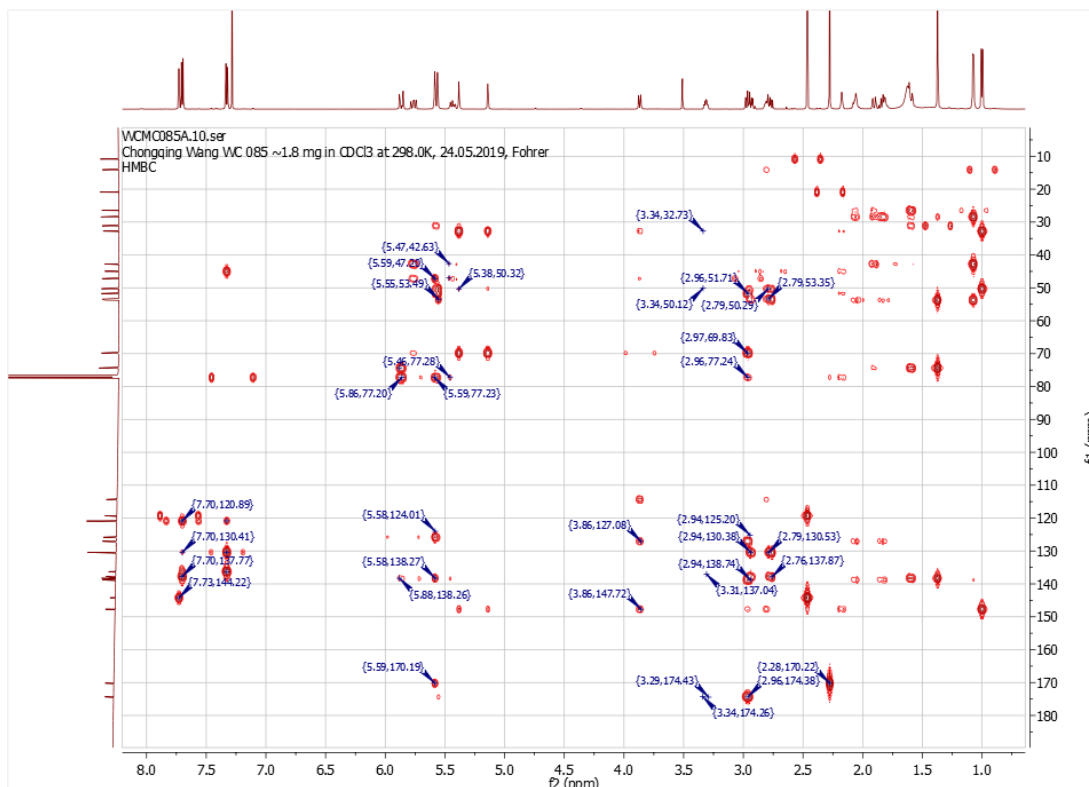

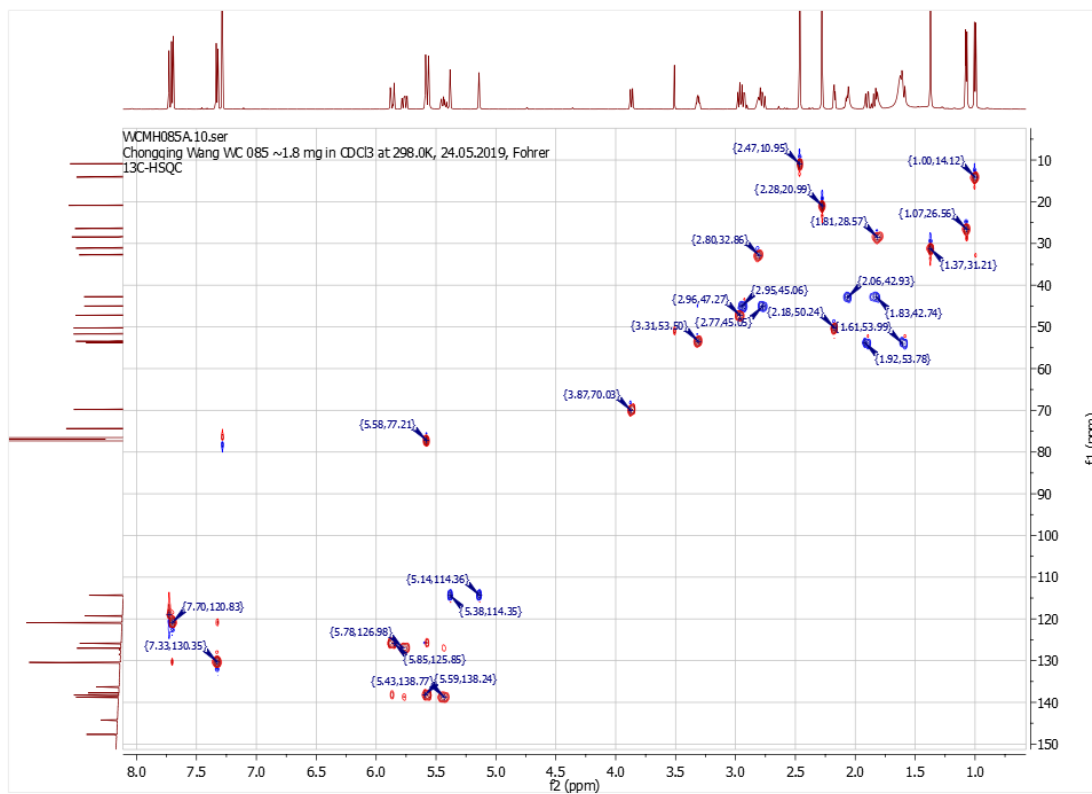

## 2.03 4'-(1-(4-phenyltriazolyl)) Cytochalasin H 5b

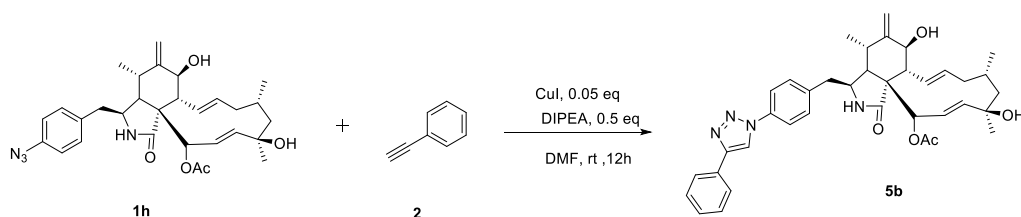

To a stirred solution of **1h** (10 mg, 0.019 mmol, 1.0 eq) and phenylacetylene (4 mg, 0.038 mmol, 2.0 eq, purchased from Acros) in DMF (2 mL) was added CuI (0.2 mg, 0.95  $\mu$ mol, 0.05 eq) and DIPEA (1.2 mg, 9.5  $\mu$ mol, 0.5 eq). The mixture was stirred at room temperature for 12 hours under nitrogen and the solvent was removed *in vacuo*. The residue was dissolved in EtOAc (2 mL) and washed with water (2 mL x 2). The organic phase was dried over MgSO<sub>4</sub>, filtered and evaporated to dryness *in vacuo*. The residue was dissolved in MeOH and purified by LCMS to afford 7.4 mg of desired product (61.8%, 0.011 mmol) as a white solid.

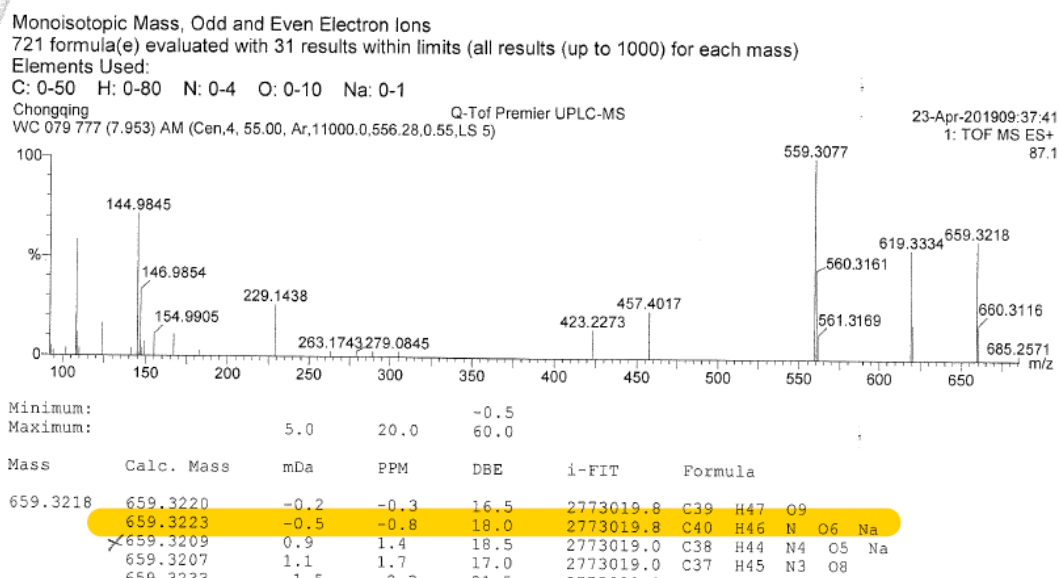

HRMS ( $m/z$ ): calculated for [C<sub>40</sub>H<sub>46</sub>N<sub>1</sub>O<sub>6</sub> + Na]: 659.3223, found: 659.3218.

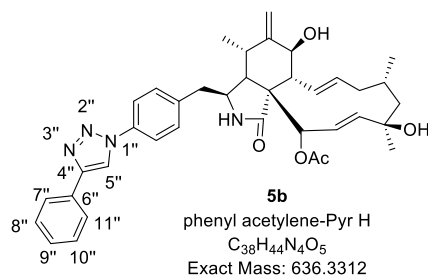

| Position | $\delta_H$ | M   | $J_{H-H}/\text{Hz}$ | $\delta_C$ | HSQC            | HMBC H to C      | H-H COSY  |
|----------|------------|-----|---------------------|------------|-----------------|------------------|-----------|
| 1        | -          | -   | -                   | 174.2      | -               | -                | -         |
| 2        | 5.56       | brs | -                   | -          | -               | -                | -         |
| 3        | 3.32       | m   | -                   | 53.3       | CH              | 1', 1, 4, 5      | 4, 5, 10  |
| 4        | 2.17       | dd  | 3.8, 5.0            | 50.2       | CH              | 1, 3, 5, 6, 10   | 3, 5, 10  |
| 5        | 2.80       | m   | -                   | 32.7       | CH              | 1', 3            | 4, 11, 12 |
| 6        | -          | -   | -                   | 147.7      | -               | -                | -         |
| 7        | 3.85       | dd  | 1.6, 10.7           | 69.7       | CH              | 6, 12            | 8, 12     |
| 8        | 2.95       | m   | -                   | 47.1       | CH              | 7, 9, 13, 20, 21 | 7, 13     |
| 9        | -          | -   | -                   | 51.6       | -               | -                | -         |
| 10a      | 2.65       | m   | -                   | 44.9       | CH <sub>2</sub> | 1', 3            | 3, 4, 12  |
| 10b      | 2.81       | m   | -                   | -          | -               | -                | -         |
| 11       | 0.99       | d   | 6.7                 | 13.9       | CH <sub>3</sub> | 4, 5, 6          | 5         |
| 12a      | 5.13       | brs | -                   | 114.2      | CH <sub>2</sub> | 5, 6, 7          | 5, 7, 11  |
| 12b      | 5.37       | brs | -                   | -          | -               | -                | -         |
| 13       | 5.74       | ddd | 1.4, 9.7,<br>15.4   | 126.9      | CH              | 7, 8, 15         | 8, 14, 15 |
| 14       | 5.44       | ddd | 4.8, 10.1,<br>15.4  | 138.6      | CH              | 9, 15            | 13, 15    |
| 15a      | 1.82       | m   | -                   | 42.8       | CH <sub>2</sub> | 13, 14, 16, 17   | 13, 14,   |
| 15b      | 2.05       | m   | -                   | -          | -               | -                | -         |
| 16       | 1.79       | m   | -                   | 28.3       | CH              | 13, 14, 17       | 22        |
| 17a      | 1.58       | dd  | 2.9, 14.4           | 53.9       | CH <sub>2</sub> | 18, 19           | -         |
| 17b      | 1.89       | m   | -                   | -          | -               | -                | -         |
| 18       | -          | -   | -                   | 74.4       | -               | -                | -         |
| 19       | 5.58       | brs | 2.3, 16.2           | 138.1      | CH              | -                | 20        |
| 20       | 5.87       | dd  | 3.0, 16.2           | 125.6      | CH              | 18, 19           | 19        |
| 21       | 5.59       | brs | -                   | 77.0       | CH              | 8, 9, 19, 20, 23 | -         |
| 22       | 1.06       | d   | 6.5                 | 26.5       | CH <sub>3</sub> | 15, 16, 17       | 16        |
| 23       | 1.35       | s   | -                   | 31.1       | CH <sub>3</sub> | 17, 18, 19       | -         |
| 1'       | -          | -   | -                   | 136.3      | -               | -                | -         |
| 2' 6'    | 7.34       | d   | 8.5                 | 130.3      | 2 x CH          | 3', 4', 5', 10   | 3', 5'    |
| 3' 5'    | 7.78       | d   | 8.5                 | 120.8      | 2 x CH          | 1', 4'           | 2', 6'    |
| 4'       | -          | -   | -                   | 138.1      | -               | -                | -         |
| 24       | -          | -   | -                   | 170.2      | -               | -                | -         |
| 25       | 2.26       | s   | -                   | 20.9       | CH <sub>3</sub> | 24               | -         |
| 4''      | -          | -   | -                   | 148.5      | -               | -                | -         |
| 5''      | 8.18       | s   | -                   | 117.0      | CH              | 4''              | -         |
| 6''      | -          | -   | -                   | 129.6      | -               | -                | -         |
| 7'' 11'' | 7.92       | dd  | 1.4, 8.4            | 125.7      | 2 x CH          | 4'', 9''         | 8'', 10'' |
| 9''      | 7.40       | dd  | 8.4, 18.6           | 128.5      | CH              | 7'', 11''        | 8'', 10'' |
| 8'' 10'' | 7.47       | dd  | 7.4, 8.4            | 128.7      | 2 x CH          | 6''              | 7'', 11'' |

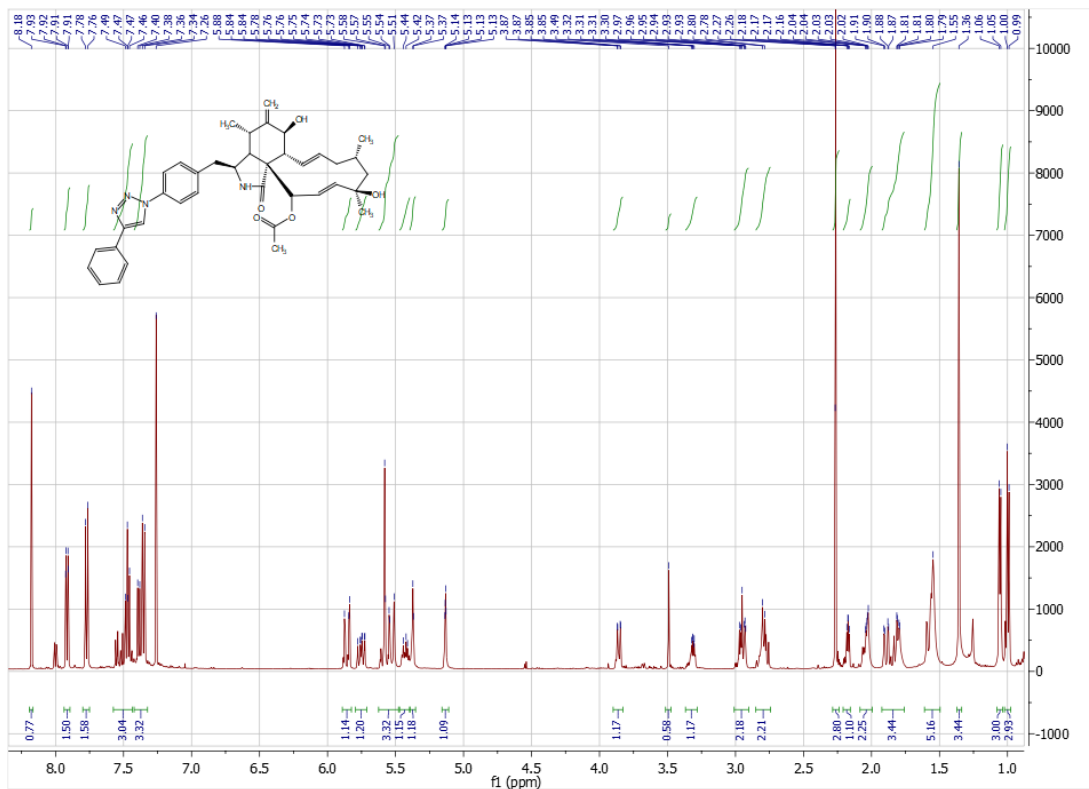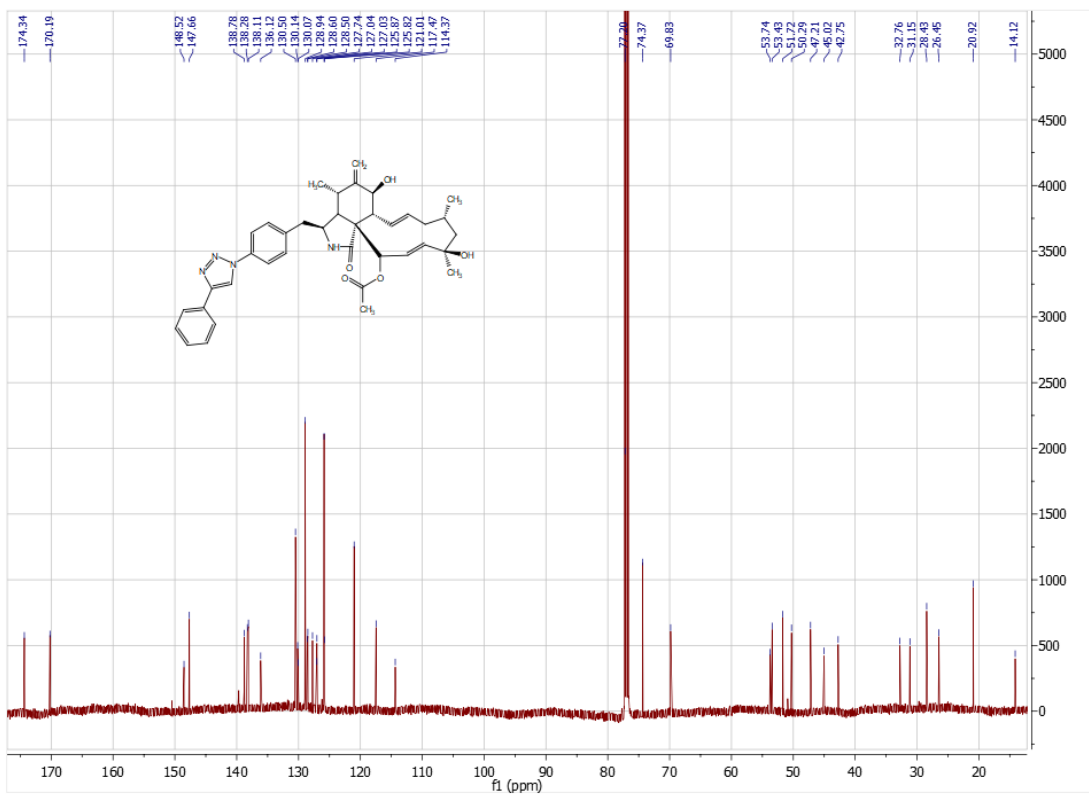

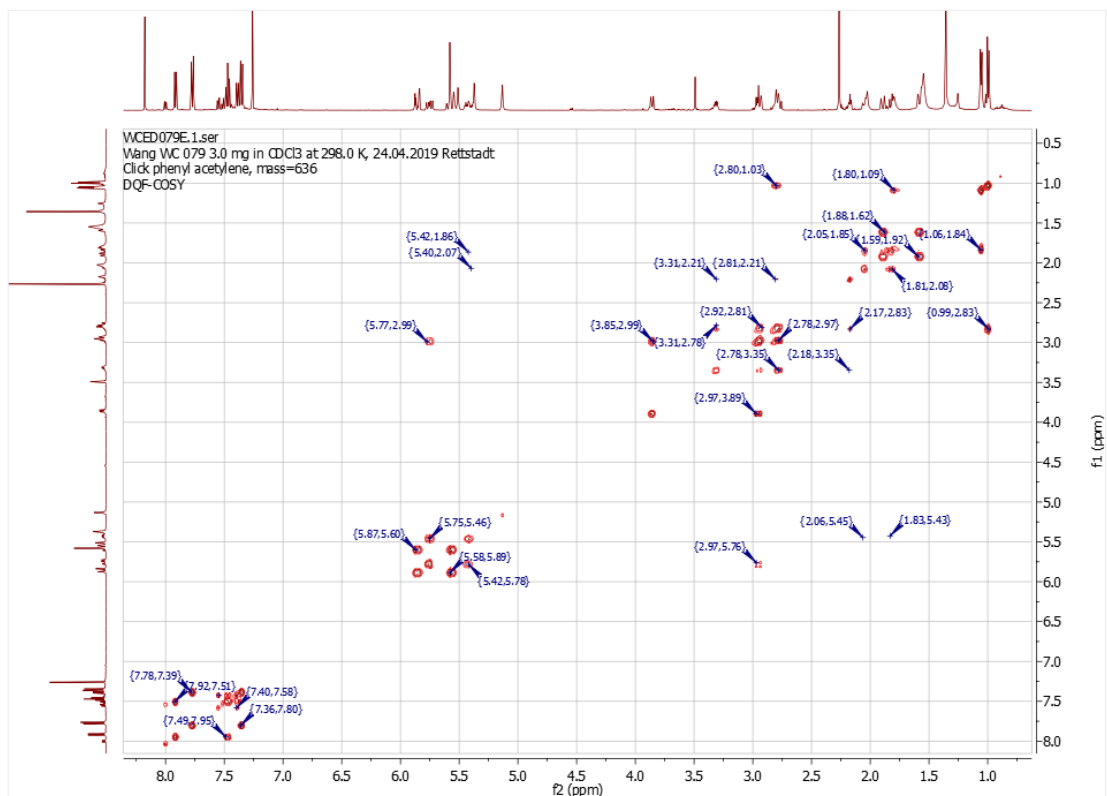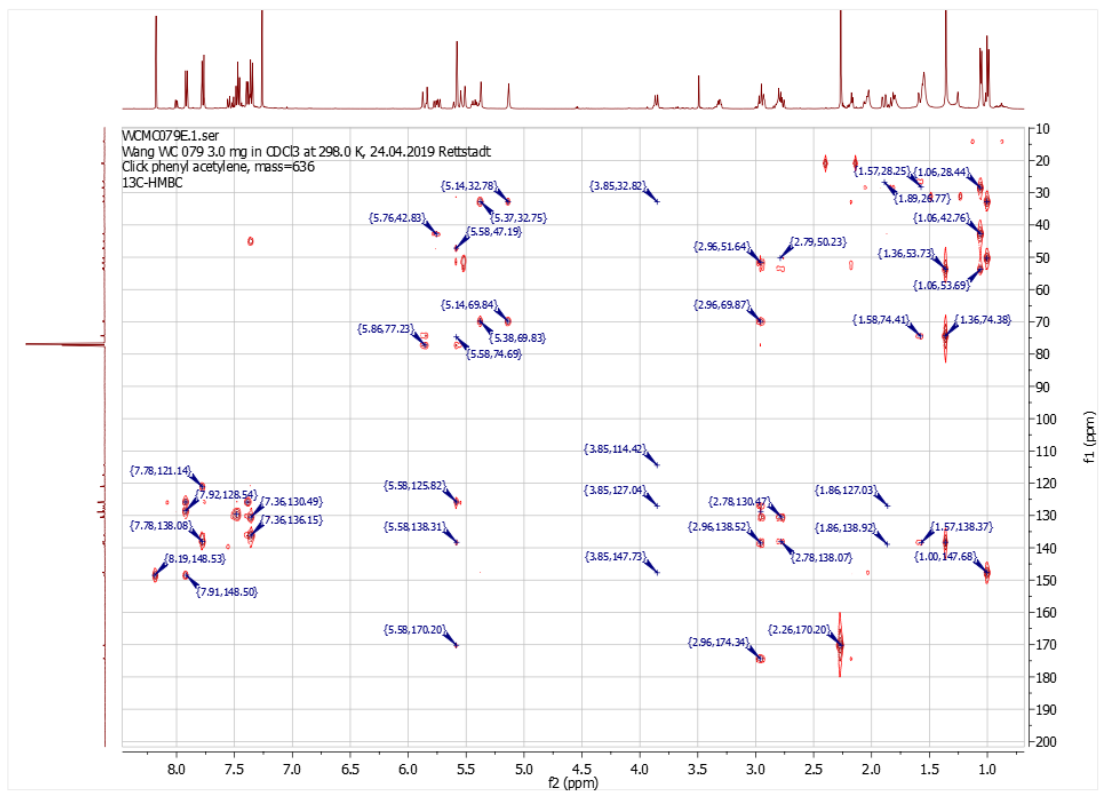

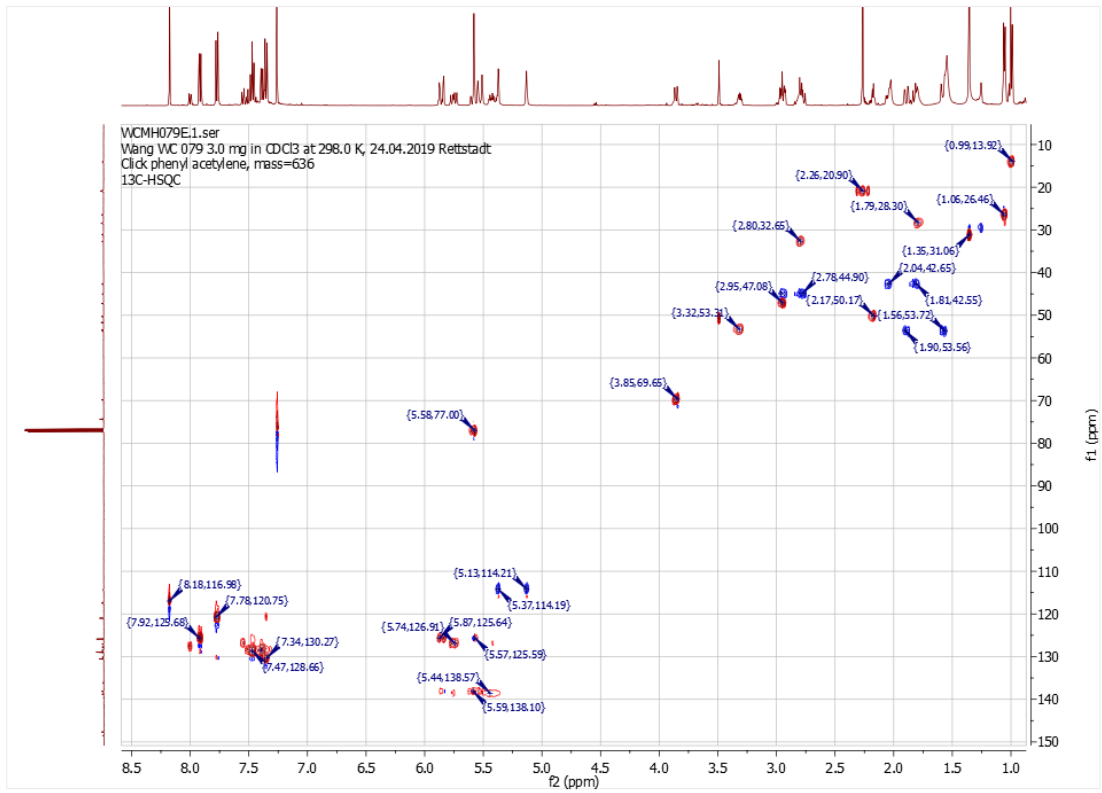

## 2.04 4'-(1-(4-*p*-bromophenyl)triazolyl) Cytochalasin H 5c

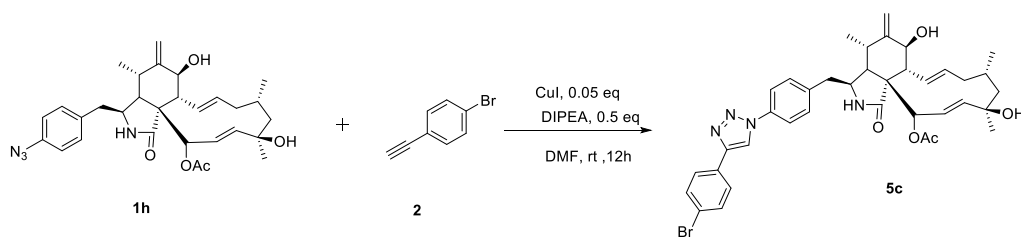

To a stirred solution of **1h** (10 mg, 0.019 mmol, 1.0 eq) and *p*-bromophenylacetylene (6.8 mg, 0.038 mmol, 2.0 eq, purchased from Acros) in DMF (2 mL) was added CuI (0.2 mg, 0.95  $\mu$ mol, 0.05 eq) and DIPEA (1.2 mg, 9.5  $\mu$ mol, 0.5 eq). The mixture was stirred at 80 °C for 12 hours under nitrogen and the solvent was removed *in vacuo*. The residue was dissolved in EtOAc (2 mL) and washed with water (2 mL x 2). The organic phase was dried over MgSO<sub>4</sub>, filtered and evaporated to dryness *in vacuo*. The residue was dissolved in MeOH and purified by LCMS to afford 8.1 mg of desired product (60.6%, 0.011 mmol) as a white solid.

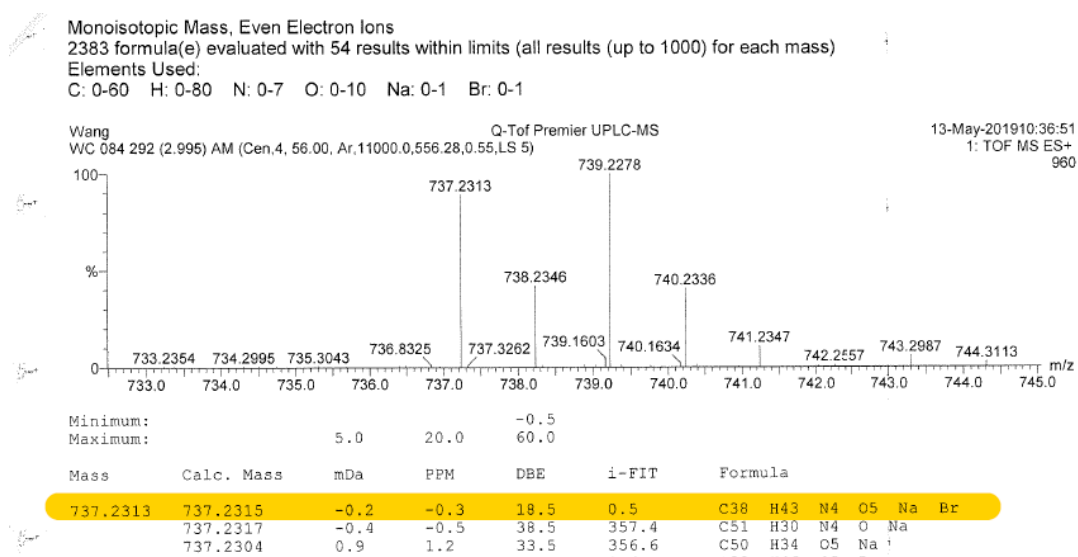

HRMS (*m/z*): calculated for [C<sub>38</sub>H<sub>43</sub>N<sub>4</sub>O<sub>5</sub>Br + Na]: 737.2315, found: 737.2313.



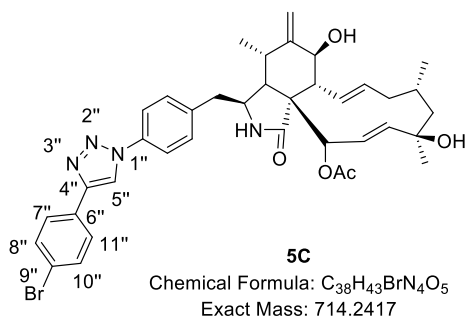

| Position | $\delta_H$ | M   | $J_{H-H}/\text{Hz}$ | $\delta_C$ | HSQC            | HMBC H to C      | H-H COSY  |
|----------|------------|-----|---------------------|------------|-----------------|------------------|-----------|
| 1        | -          | -   | -                   | 174.4      | -               | -                | -         |
| 2        | 5.56       | brs | -                   | -          | -               | -                | -         |
| 3        | 3.33       | m   | -                   | 53.4       | CH              | 1', 1, 4, 5      | 4, 5, 10  |
| 4        | 2.18       | dd  | 3.8, 5.0            | 50.3       | CH              | 1, 3, 5, 6, 10   | 3, 5, 10  |
| 5        | 2.81       | m   | -                   | 32.7       | CH              | 1', 3            | 4, 11, 12 |
| 6        | -          | -   | -                   | 147.6      | -               | -                | -         |
| 7        | 3.88       | dd  | 1.6, 10.7           | 69.9       | CH              | 6, 12            | 8, 12     |
| 8        | 2.95       | m   | -                   | 47.2       | CH              | 7, 9, 13, 20, 21 | 7, 13     |
| 9        | -          | -   | -                   | 51.7       | -               | -                | -         |
| 10a      | 2.80       | m   | -                   | 44.9       | CH <sub>2</sub> | 1', 3            | 3, 4, 12  |
| 10b      | 2.97       | m   | -                   | -          | -               | -                | -         |
| 11       | 1.02       | d   | 6.7                 | 14.1       | CH <sub>3</sub> | 4, 5, 6          | 5         |
| 12a      | 5.15       | brs | -                   | 114.3      | CH <sub>2</sub> | 5, 6, 7          | 5, 7, 11  |
| 12b      | 5.39       | brs | -                   | -          | -               | -                | -         |
| 13       | 5.76       | ddd | 1.4, 9.7, 15.4      | 127.0      | CH              | 7, 8, 15         | 8, 14, 15 |
| 14       | 5.41       | ddd | 4.8, 10.1, 15.4     | 138.7      | CH              | 9, 15            | 13, 15    |
| 15a      | 1.83       | m   | -                   | 42.7       | CH <sub>2</sub> | 13, 14, 16, 17   | 13, 14,   |
| 15b      | 2.06       | m   | -                   | -          | -               | -                | -         |
| 16       | 1.81       | m   | -                   | 28.5       | CH              | 13, 14, 17       | 22        |
| 17a      | 1.61       | dd  | 2.9, 14.4           | 53.7       | CH <sub>2</sub> | 18, 19           | -         |
| 17b      | 1.89       | dd  | 3.0, 14.4           | -          | -               | -                | -         |
| 18       | -          | -   | -                   | 74.4       | -               | -                | -         |
| 19       | 5.58       | brs | -                   | 138.3      | CH              | -                | 20        |
| 20       | 5.88       | dd  | 3.0, 16.2           | 125.7      | CH              | 18, 19           | 19        |
| 21       | 5.58       | brs | -                   | 77.1       | CH              | 8, 9, 19, 20, 23 | -         |
| 22       | 1.07       | d   | 6.5                 | 26.5       | CH <sub>3</sub> | 15, 16, 17       | 16        |
| 23       | 1.35       | s   | -                   | 31.2       | CH <sub>3</sub> | 17, 18, 19       | -         |
| 1'       | -          | -   | -                   | 136.1      | -               | -                | -         |
| 2' 6'    | 7.38       | d   | 8.5                 | 130.5      | 2 x CH          | 3', 4', 5', 10   | 3', 5'    |
| 3' 5'    | 7.78       | d   | 8.5                 | 121.0      | 2 x CH          | 1', 4'           | 2', 6'    |
| 4'       | -          | -   | -                   | 120.9      | -               | -                | -         |
| 24       | -          | -   | -                   | 170.2      | -               | -                | -         |
| 25       | 2.28       | s   | -                   | 20.9       | CH <sub>3</sub> | 24               | -         |
| 4''      | -          | -   | -                   | 147.5      | -               | -                | -         |
| 5''      | 8.20       | s   | -                   | 117.4      | CH              | 4''              | -         |
| 6''      | -          | -   | -                   | 129.1      | -               | -                | -         |
| 7'' 11'' | 7.82       | dd  | 1.4, 8.4            | 127.4      | 2 x CH          | 4'', 9''         | 8'', 10'' |
| 8'' 10'' | 7.61       | dd  | 7.4, 8.4            | 132.0      | 2 x CH          | 6''              | 7'', 11'' |

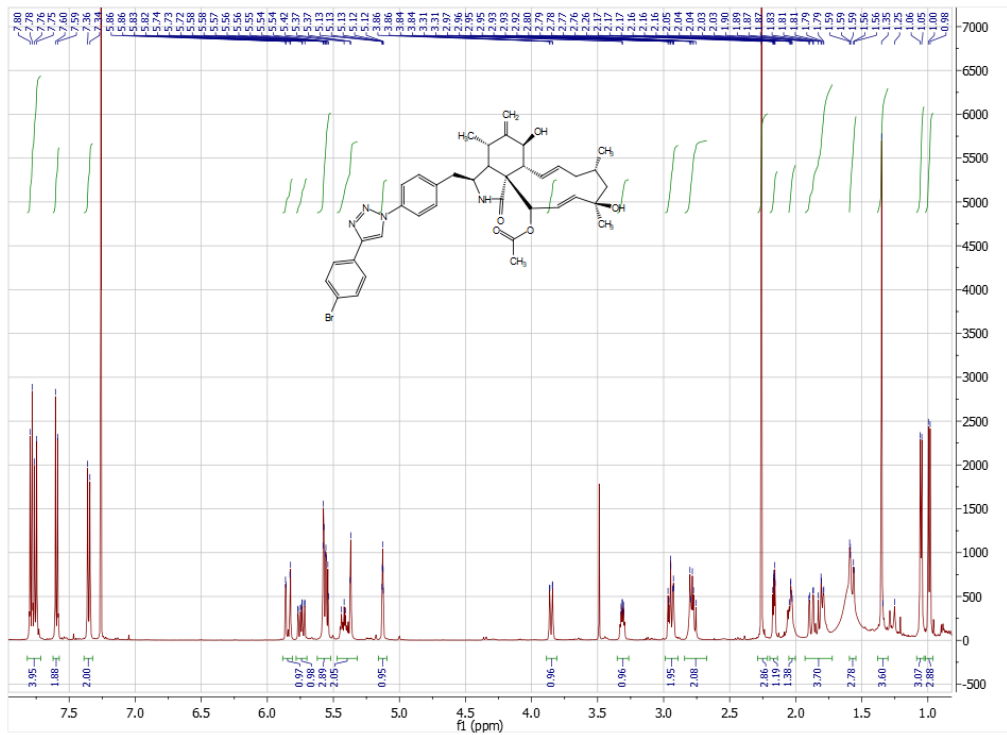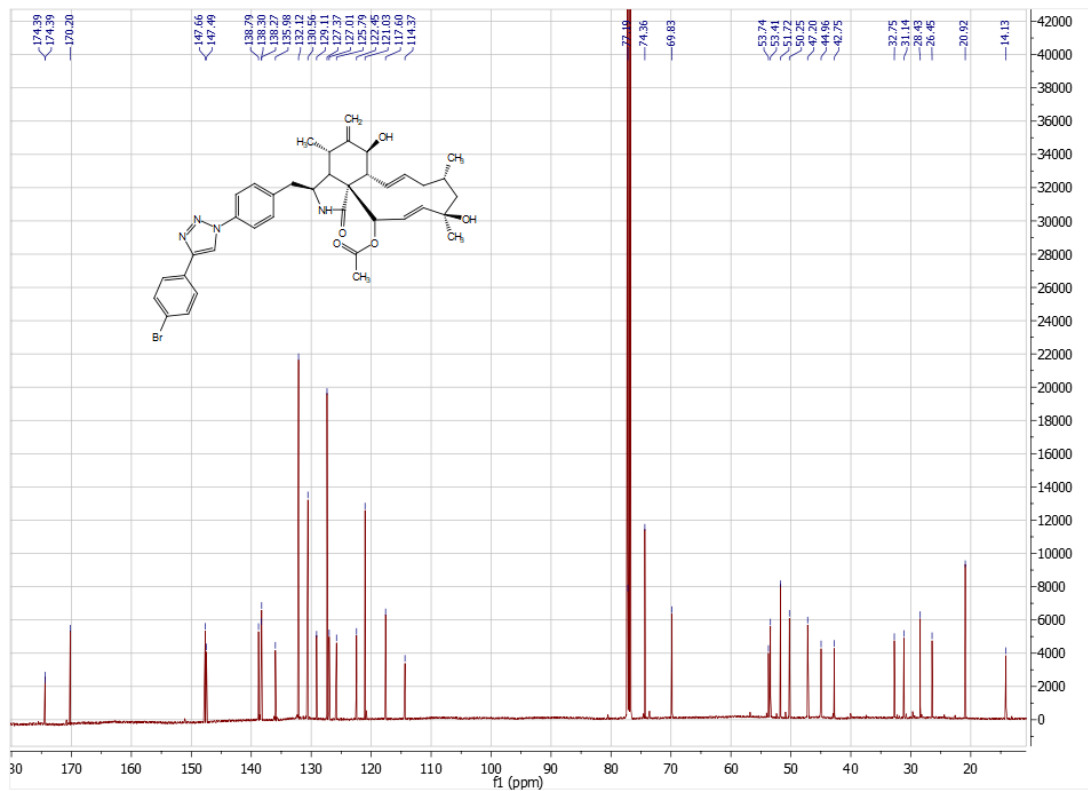

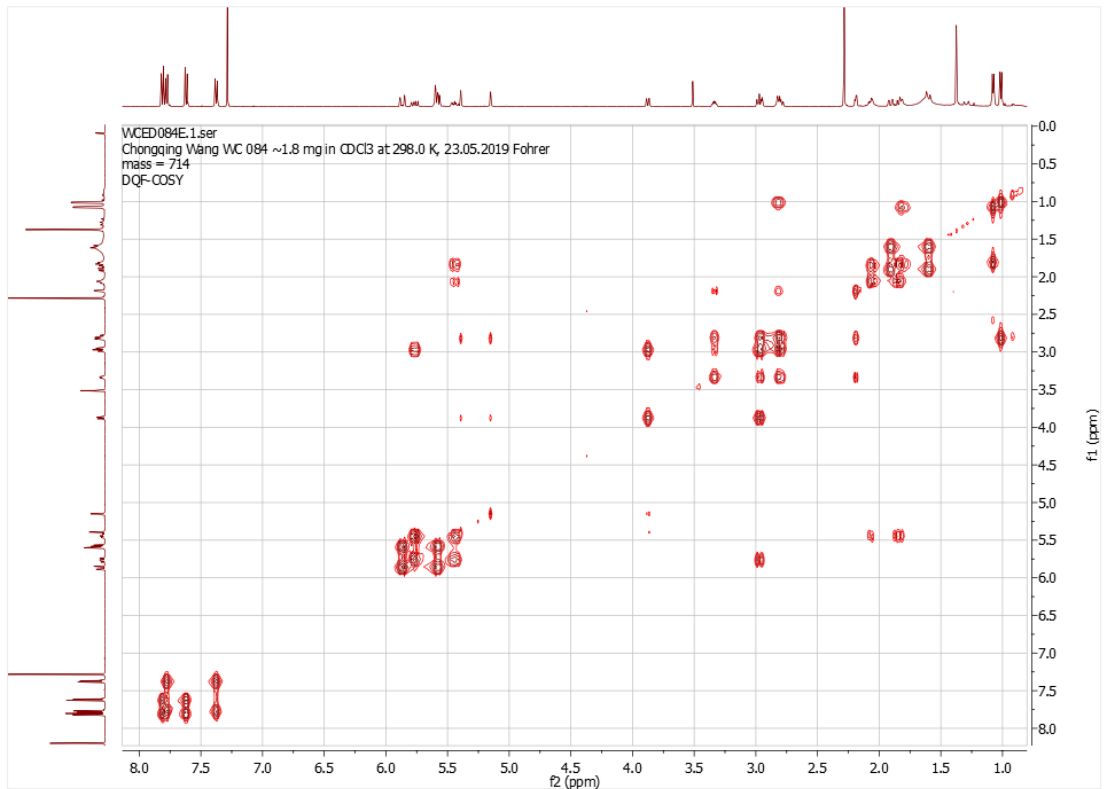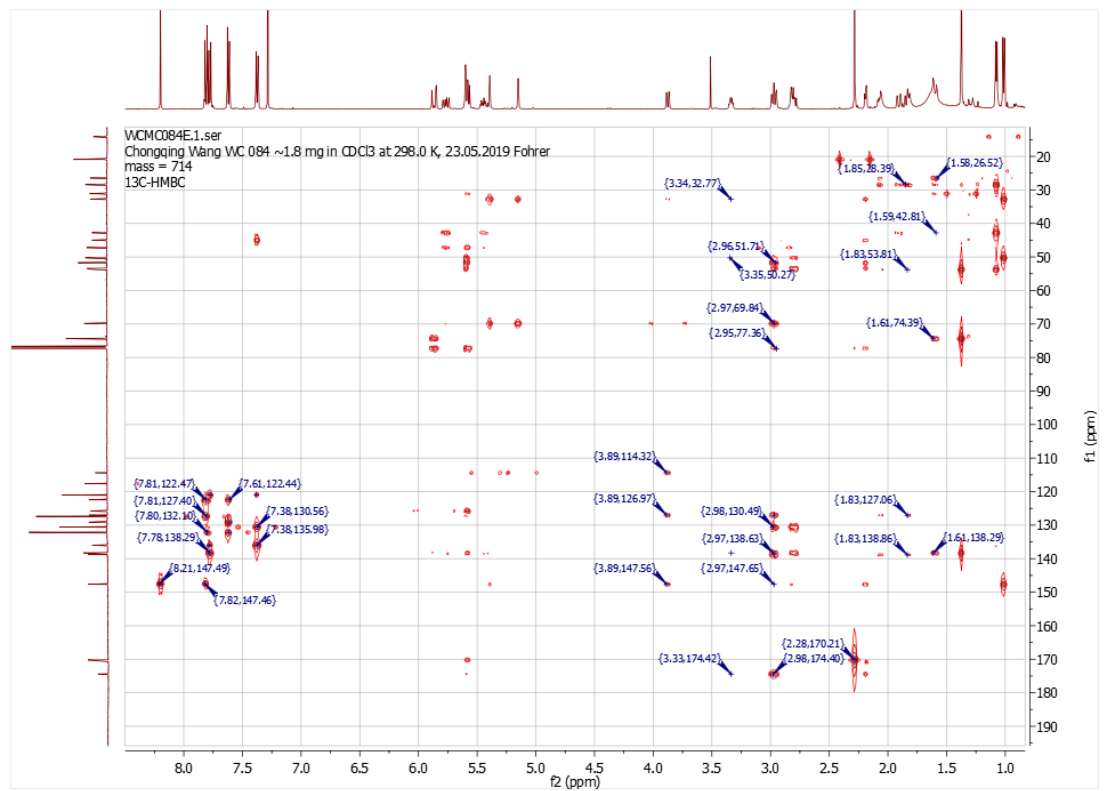

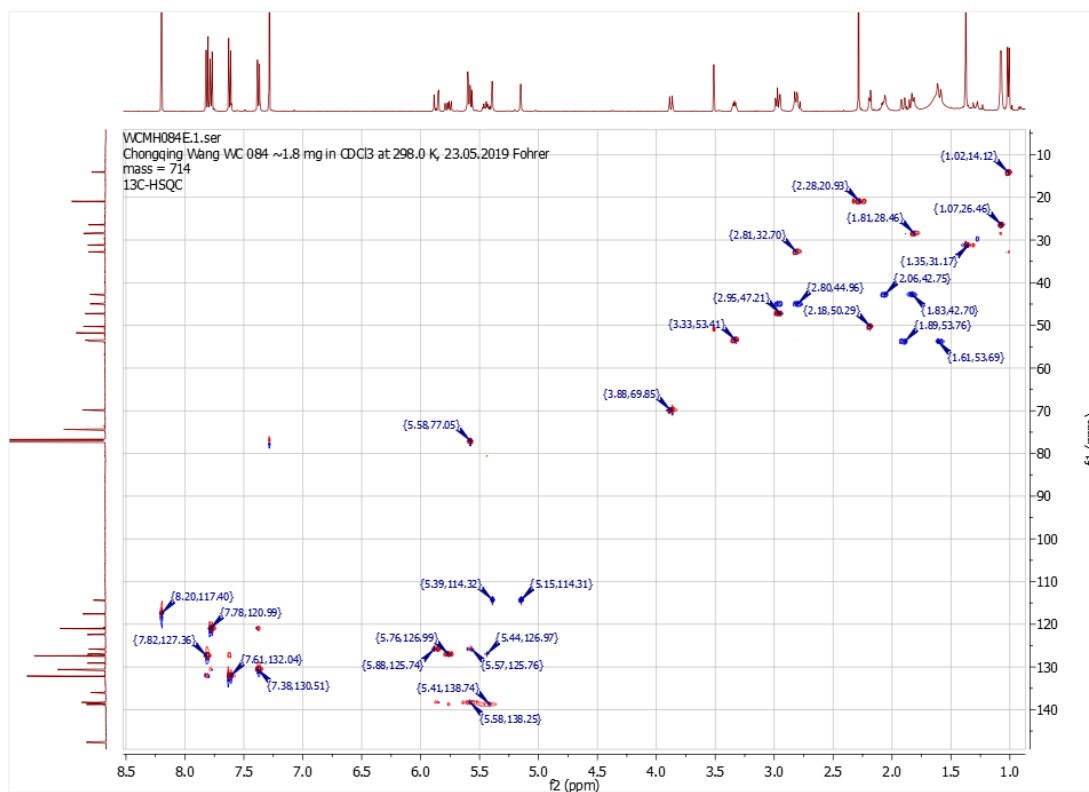

## 2.05 Biotin propargyl ester 6a

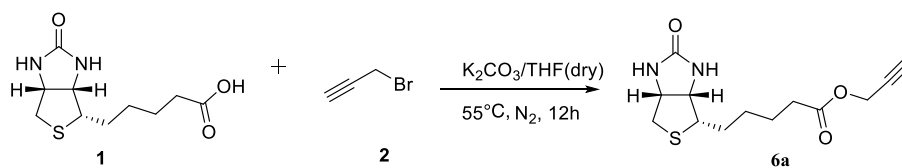

To a stirred solution of **biotin** (100.0 mg, 0.41 mmol, 1.0 eq, purchased from Sigma-Aldrich) and propargyl bromide (0.1 mL, 0.82 mmol, 2.0 eq, purchased from Acros) in dry THF (4 mL) was added K<sub>2</sub>CO<sub>3</sub> (50.0 mg, 0.49 mmol, 1.2 eq). The mixture was stirred at 55 °C for 12 hours under nitrogen and the solvent was removed *in vacuo*. The residue was dissolved in EtOAc (4 mL) and washed with water (3 mL x 2). The organic phase was dried over MgSO<sub>4</sub>, filtered and evaporated to dryness *in vacuo*. The residue was dissolved in MeOH and purified by LCMS to afford 69.0 mg of desired product (59.7%, 0.230 mmol) as a white solid.

**<sup>1</sup>H NMR (500 MHz, CDCl<sub>3</sub>):**  $\delta$  (Hz) = 4.70 (d,  $J$  = 2.5 Hz, 2H), 4.56 (m, 1H), 4.37 (m, 2H), 3.20 (m, 1H), 2.95 (dd,  $J$  = 5.0 and 12.9 Hz, 1H), 2.77 (d,  $J$  = 12.9 Hz, 1H), 2.51 (t,  $J$  = 2.5 Hz, 2H), 2.41 (t,  $J$  = 7.1 Hz, 2H), 1.73 (m, 2H), 1.50 (m, 2H), 1.27 (m, 2H).

**<sup>13</sup>C NMR (125 MHz, CDCl<sub>3</sub>):**  $\delta$  = 172.6, 163.1, 79.5, 75.5, 62.0, 60.3, 55.2, 51.9, 40.6, 33.6, 29.8, 28.3, 24.6.

**HRMS ( $m/z$ ):** calculated for [C<sub>13</sub>H<sub>18</sub>N<sub>2</sub>O<sub>3</sub>S + Na]: 305.0936, found: 305.0936.

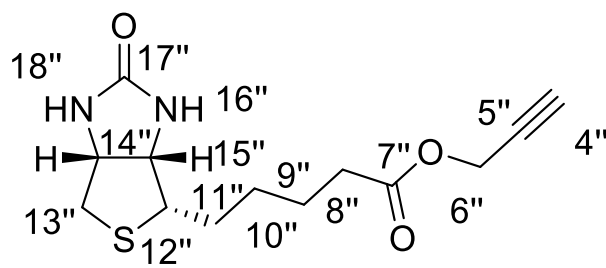

6a

| Position | $\delta_H$ | M  | $J_{H-H}/\text{Hz}$ | $\delta_C$ | HSQC            | HMBC H to C      | H-H COSY   |
|----------|------------|----|---------------------|------------|-----------------|------------------|------------|
| 4''      | 2.51       | t  | 2.5                 | 75.5       | CH              | 5'', 6''         | 5''        |
| 5''      | -          | -  | -                   | 79.5       | -               | -                | 6''        |
| 6''      | 4.70       | d  | 2.5                 | 51.9       | CH <sub>2</sub> | 4'', 6''         | 5''        |
| 7''      | -          | -  | -                   | 172.6      | -               | -                | -          |
| 8''      | 2.41       | t  | 7.1                 | 33.6       | CH <sub>2</sub> | 7'', 9''         | 9''        |
| 9a''     | 1.50       | m  | -                   | 28.3       | CH <sub>2</sub> | 8'', 10''        | 8''        |
| 9b''     | 1.73       | m  | -                   | -          | -               | -                | -          |
| 10''     | 1.27       | m  | -                   | 29.8       | CH <sub>2</sub> | -                | -          |
| 11''     | 1.73       | m  | -                   | 24.6       | CH <sub>2</sub> | 9'', 12''        | 12''       |
| 12''     | 3.20       | m  | -                   | 55.2       | CH              | 9''              | 11'', 15'' |
| 13a''    | 2.77       | d  | 12.9                | 40.6       | CH <sub>2</sub> | 12'', 14''       | 14''       |
| 13b''    | 2.95       | dd | 5.0, 12.9           | -          | -               | -                | -          |
| 14''     | 4.56       | m  | -                   | 60.3       | CH              | 12'', 13'', 17'' | 13'', 15'' |
| 15''     | 4.37       | m  | -                   | 62.0       | CH              | 12'', 13'', 17'' | 12'', 14'' |
| 17''     | -          | -  | -                   | 163.1      | -               | -                | -          |

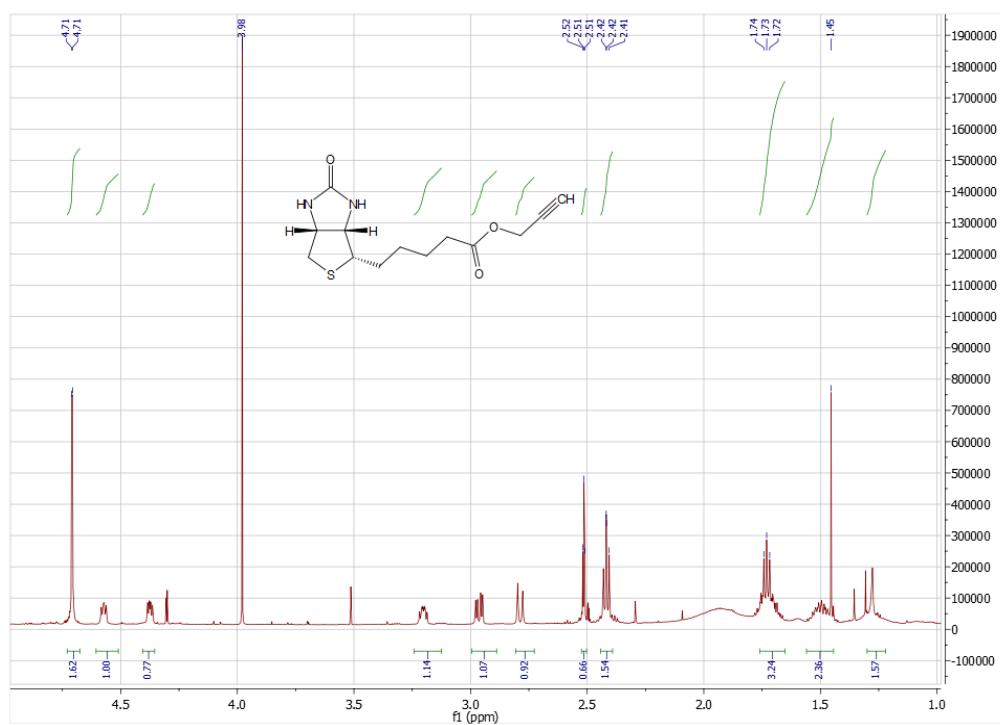

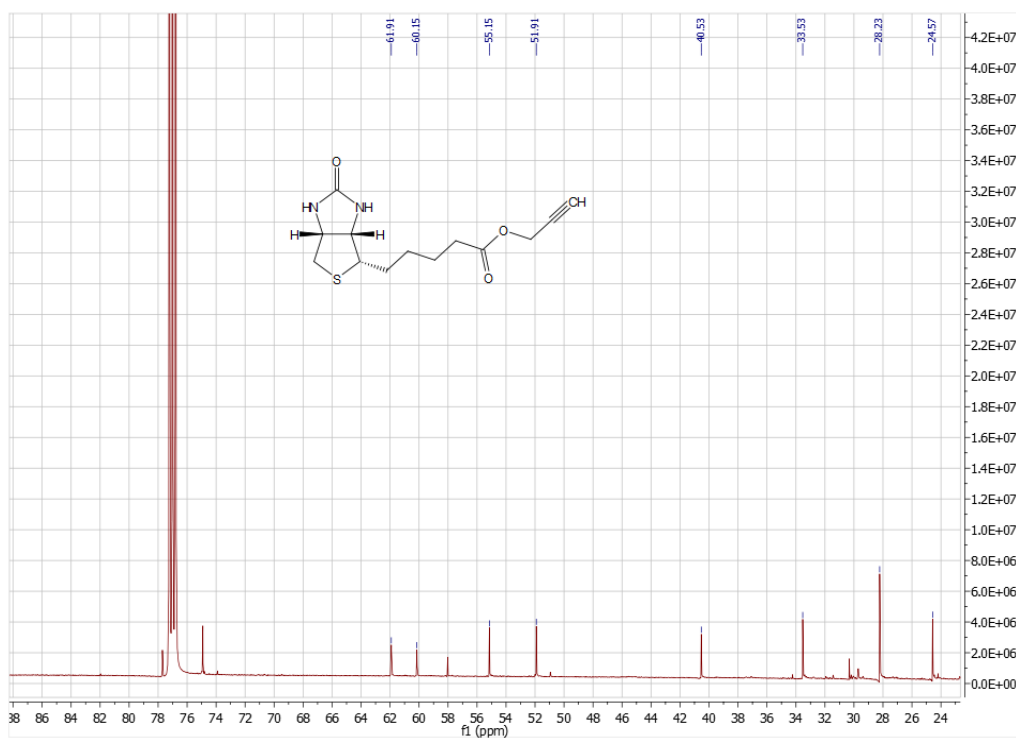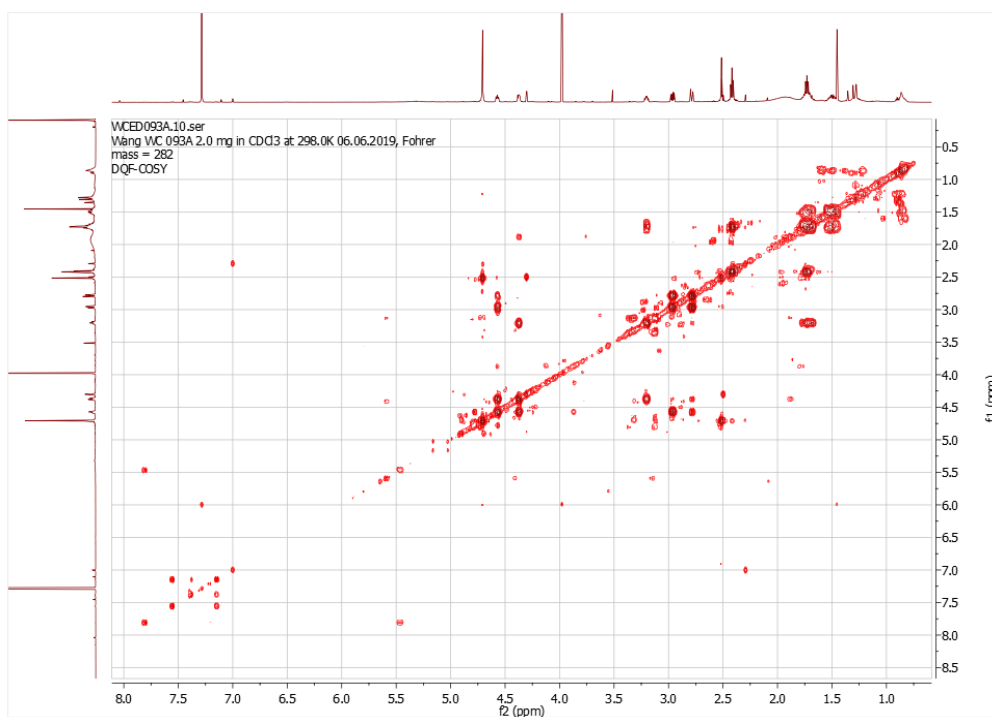

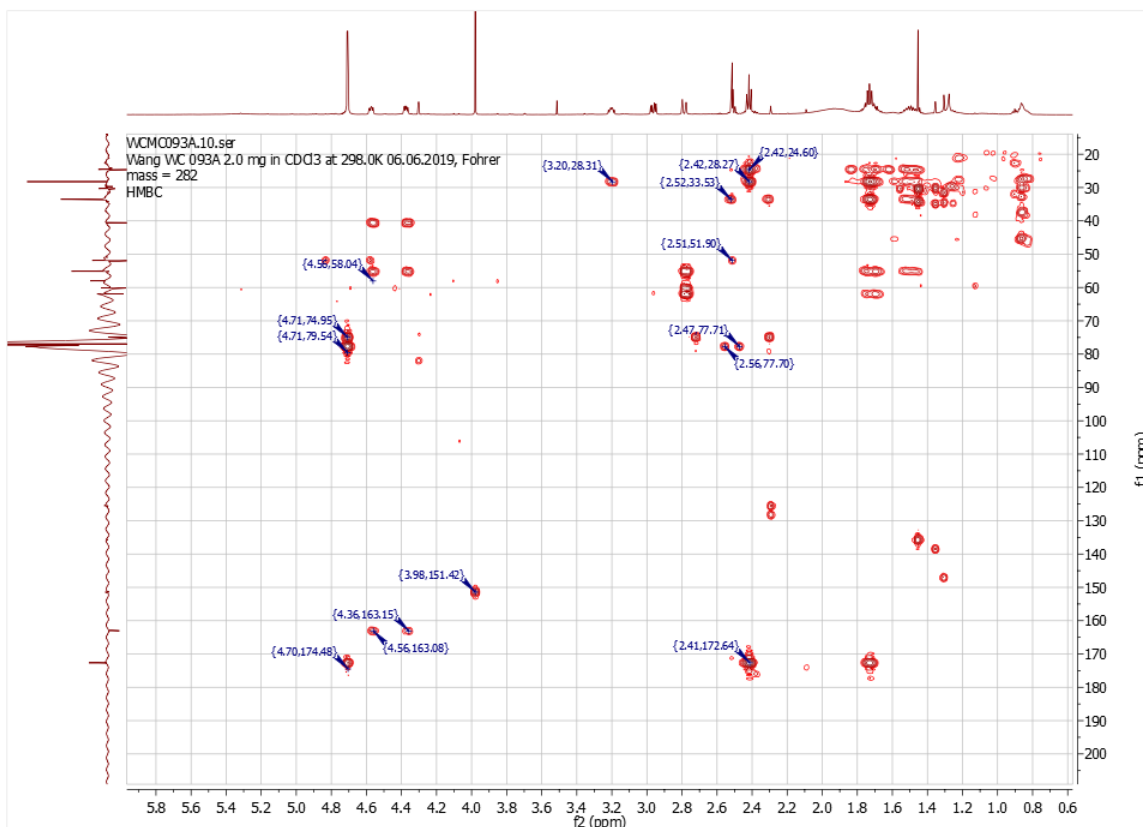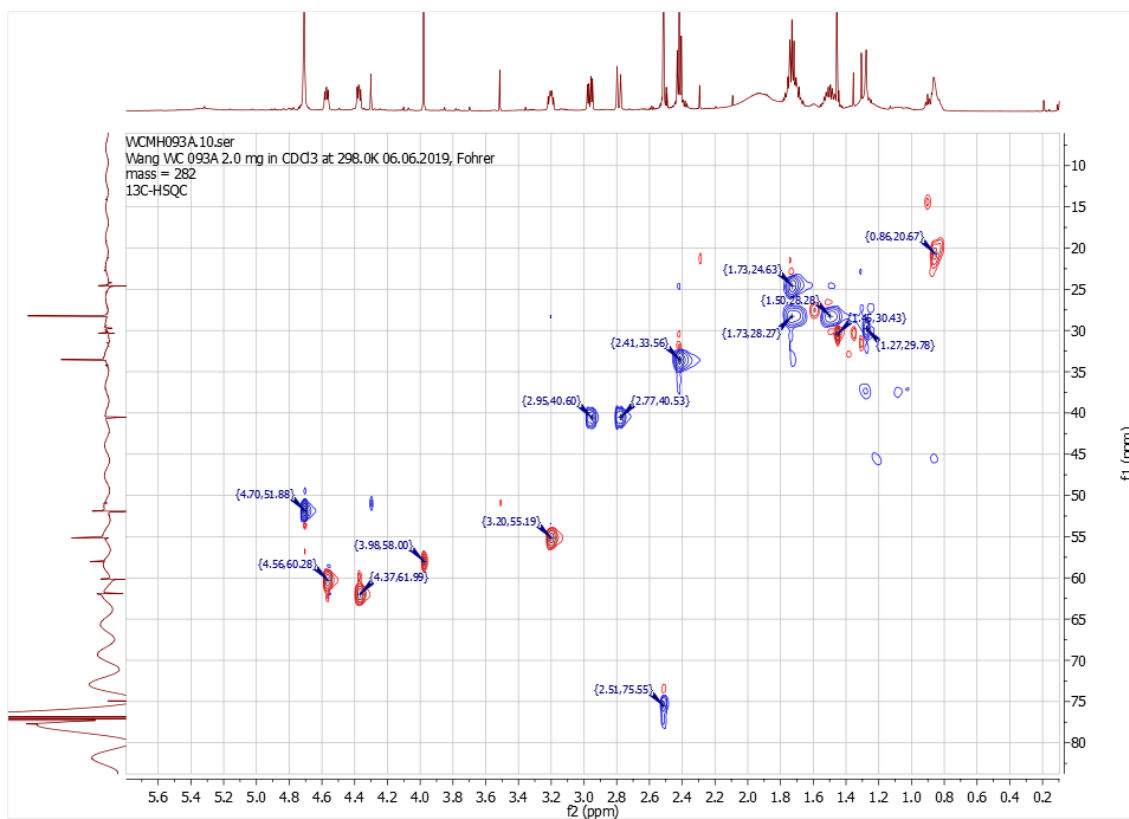

## 2.06 Biotin but-3-ynyl ester 6b



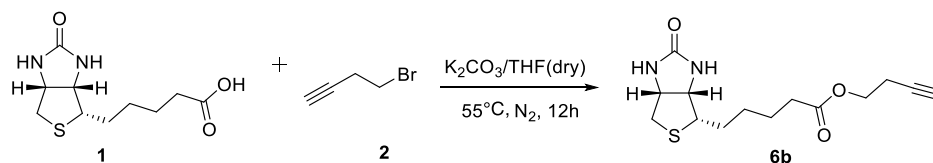

To a stirred solution of **biotin** (100.0 mg, 0.41 mmol, 1.0 eq, purchased from Sigma-Aldrich) and 1-bromo-but-3-yne (80.0 mg, 0.61 mmol, 1.5 eq, purchased from Sigma-Aldrich) in dry THF (4 mL) was added  $K_2CO_3$  (50.0 mg, 0.49 mmol, 1.2 eq). The mixture was stirred at 55 °C for 12 hours under nitrogen and the solvent was removed *in vacuo*. The residue was dissolved in EtOAc (4 mL) and washed with water (3 mL x 2). The organic phase was dried over  $MgSO_4$ , filtered and evaporated to dryness *in vacuo*. The residue was dissolved in MeOH and purified by LCMS to afford 100.2 mg of desired product (82.6%, 0.313 mmol) as a white solid.

$^1H$  NMR (500 MHz,  $CDCl_3$ ):  $\delta$  (Hz) = 4.54 (m, 1H), 4.35 (m, 1H), 4.21 (t,  $J = 6.8$  Hz 2H), 3.19 (m, 1H), 2.96 (dd,  $J = 5.1$  and 12.8 Hz, 1H), 2.75 (dd,  $J = 1.0$  and 12.8 Hz, 1H), 2.55 (ddd,  $J = 2.7, 6.8$  and 13.5 Hz 2H), 2.39 (t,  $J = 7.4$  Hz, 2H), 1.73 (m, 2H), 1.71 (m, 1H), 1.46 (m, 1H), 1.28 (m, 2H).

$^{13}C$  NMR (125 MHz,  $CDCl_3$ ):  $\delta = 173.3, 163.1, 80.1, 69.9, 62.0, 61.9, 60.1, 55.2, 40.6, 33.7, 29.7, 28.1, 24.7$ .

HRMS ( $m/z$ ): calculated for  $[C_{14}H_{20}N_2O_3S + Na]$ : 319.1092, found: 319.1087.

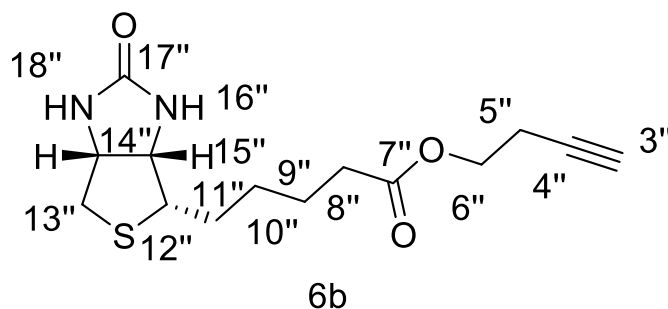

| Position | $\delta_H$ | M   | $J_{H-H}/\text{Hz}$ | $\delta_C$ | HSQC            | HMBC H to C      | H-H COSY   |
|----------|------------|-----|---------------------|------------|-----------------|------------------|------------|
| 3''      | 2.04       | dd  | 2.6, 5.3            | 69.9       | CH              | 4'', 5'', 6''    | 5''        |
| 4''      | -          | -   | -                   | 80.1       | -               | -                | -          |
| 5''      | 2.55       | ddd | 2.7, 6.8,<br>13.5   | 19.0       | CH <sub>2</sub> | 3'', 4'', 6''    | 3'', 6''   |
| 6''      | 4.21       | t   | 6.8                 | 62.0       | CH <sub>2</sub> | -                | 5''        |
| 7''      | -          | -   | -                   | 173.3      | -               | -                | -          |
| 8''      | 2.39       | t   | 7.4                 | 33.7       | CH <sub>2</sub> | 7'', 9'', 11''   | 9''        |
| 9a''     | 1.46       | m   | -                   | 28.1       | CH <sub>2</sub> | 8'', 12''        | 8''        |
| 9b''     | 1.71       | -   | -                   | -          | -               | -                | -          |
| 10''     | 1.28       | m   | -                   | 29.7       | CH <sub>2</sub> | -                | -          |
| 11''     | 1.73       | m   | -                   | 24.7       | CH <sub>2</sub> | 9'', 12''        | 12''       |
| 12''     | 3.19       | m   | -                   | 55.2       | CH              | 9''              | 11'', 15'' |
| 13a''    | 2.75       | dd  | 1.0, 12.8           | 40.6       | CH <sub>2</sub> | 12'', 14''       | 14''       |
| 13b''    | 2.96       | dd  | 5.1, 12.8           | -          | -               | -                | -          |
| 14''     | 4.54       | m   | -                   | 60.1       | CH              | 12'', 13'', 17'' | 13'', 15'' |
| 15''     | 4.35       | m   | -                   | 61.9       | CH              | 12'', 13'', 17'' | 12'', 14'' |
| 17''     | -          | -   | -                   | 163.1      | -               | -                | -          |

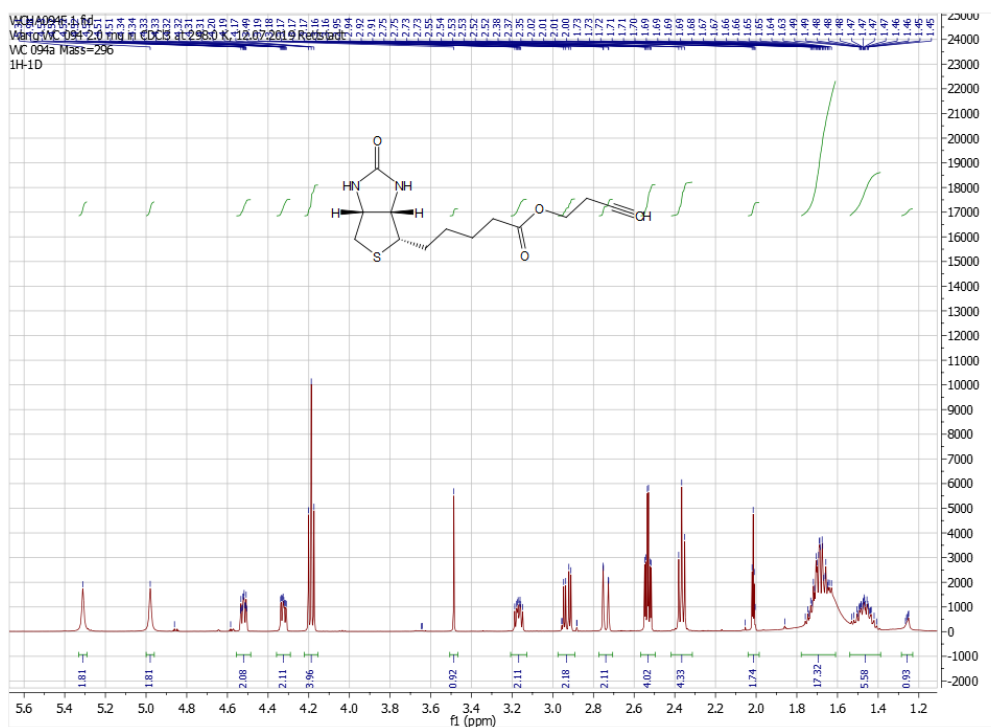

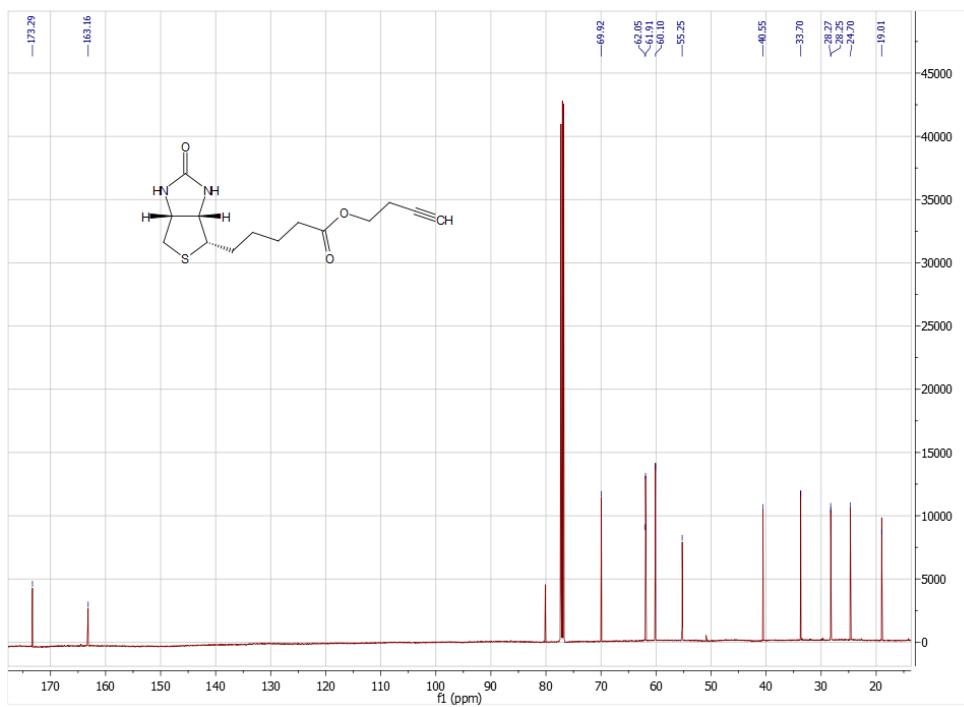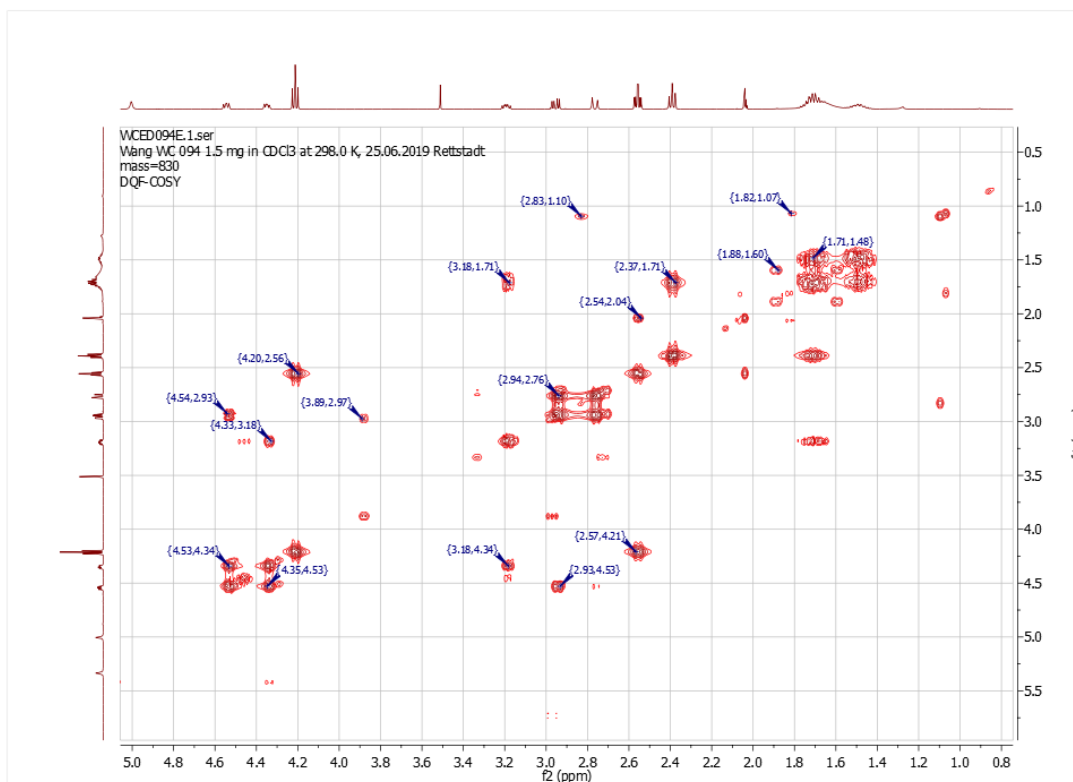

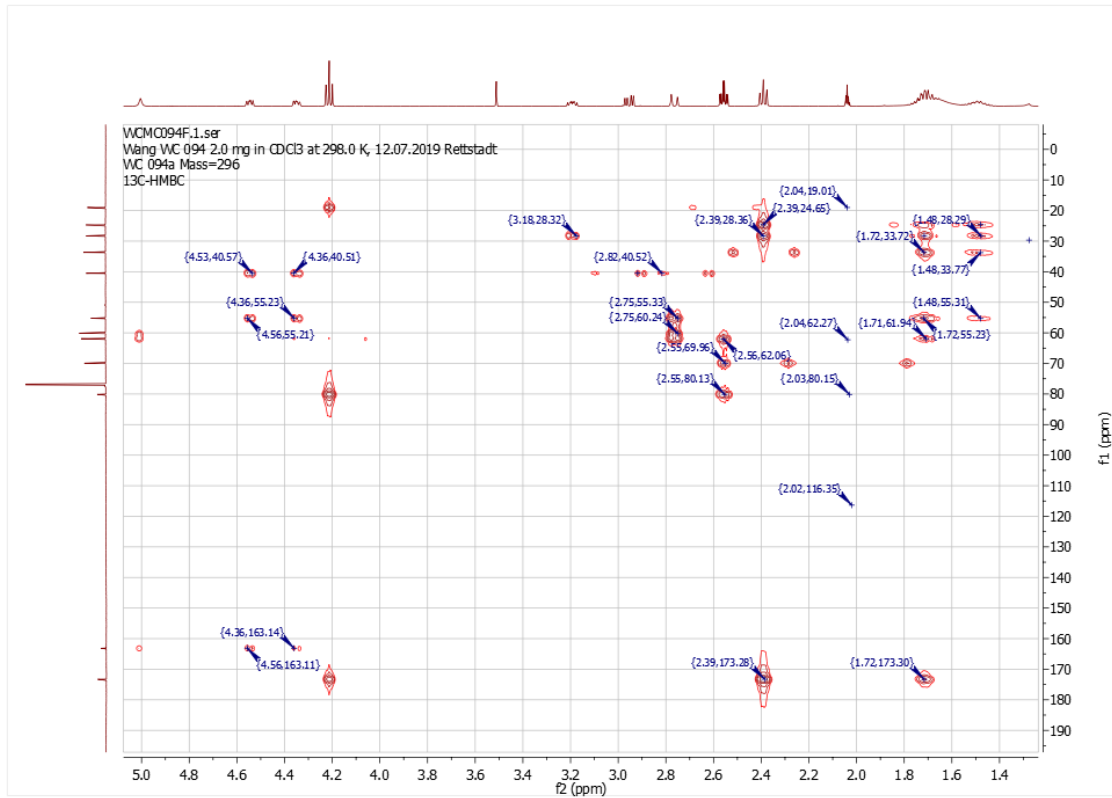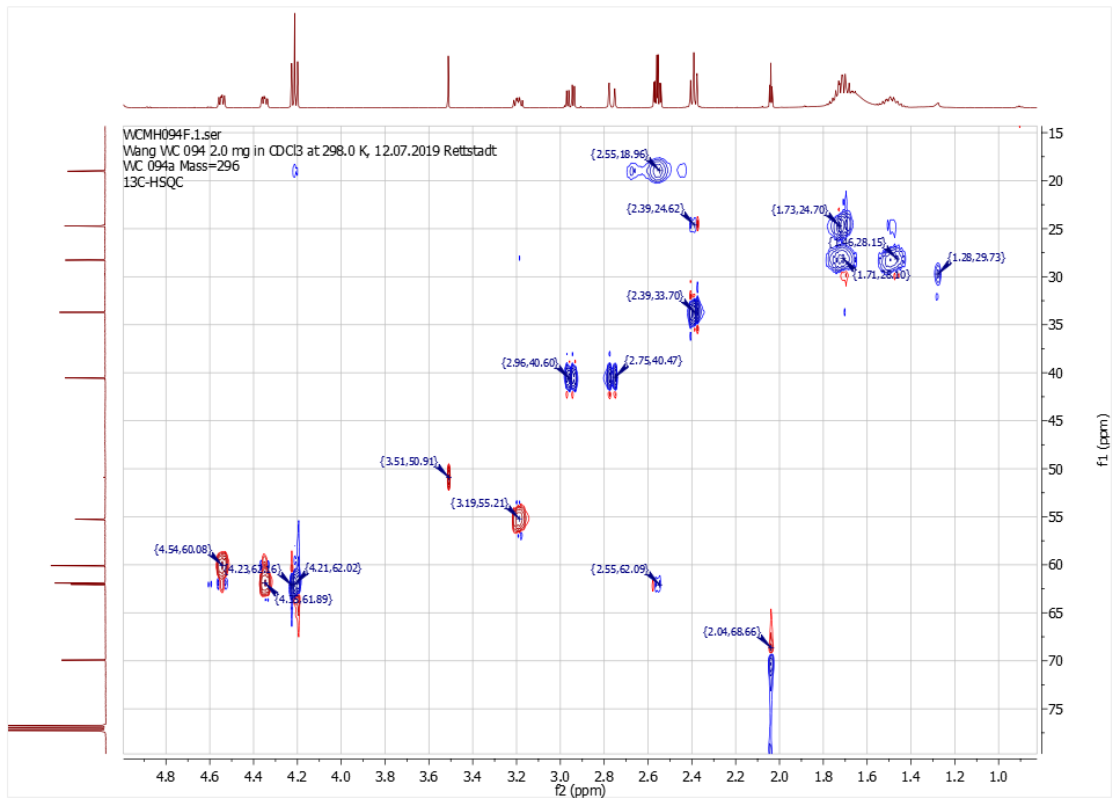

## 2.07 Biotin pent-4-ynyl ester 6c

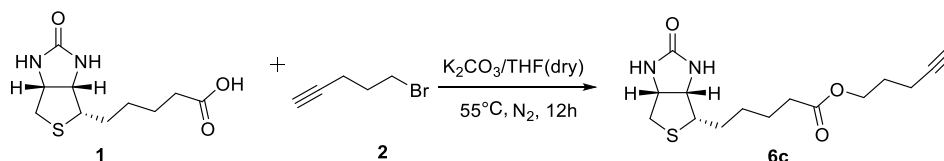

To a stirred solution of **biotin** (100.0 mg, 0.41 mmol, 1.0 eq, purchased from Sigma-Aldrich) and 1-bromopent-4-yne (90.0 mg, 0.61 mmol, 1.5 eq, purchased from Alfa Aesar) in dry THF (4 mL) was added  $K_2CO_3$  (50.0 mg, 0.49 mmol, 1.2 eq). The mixture was stirred at 55 °C for 12 hours under nitrogen and the solvent was removed *in vacuo*. The residue was dissolved in EtOAc (4 mL) and washed with water (3 mL x 2). The organic phase was dried over  $MgSO_4$ , filtered and evaporated to dryness *in vacuo*. The residue was dissolved in MeOH and purified by LCMS to afford 96.0 mg of desired product (75.6%, 0.288 mmol) as a white solid.

$^1H$  NMR (500 MHz,  $CDCl_3$ ):  $\delta$  (Hz) = 4.53 (m, 1H), 4.33 (m, 1H), 4.19 (t,  $J = 6.3$  Hz 2H), 2.92 (dd,  $J = 5.0$  and 12.8 Hz, 1H), 2.78 (d,  $J = 12.8$  Hz, 1H), 2.29 (m, 2H), 1.99 (t,  $J = 2.6$  Hz, 1H), 1.87 (m, 2H), 1.73 (m, 2H), 1.71 (m, 1H), 1.48 (m, 1H), 1.28 (m, 2H).

$^{13}C$  NMR (125 MHz,  $CDCl_3$ ):  $\delta = 173.6, 163.6, 83.1, 69.5, 62.9, 62.0, 60.1, 40.3, 29.7, 28.6, 27.6, 24.8, 24.7, 15.4$ .

HRMS ( $m/z$ ): calculated for  $[C_{15}H_{22}N_2O_3S + Na]$ : 333.1249, found: 333.1246.

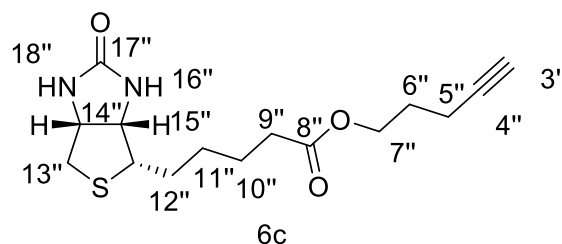

| Position | $\delta_H$ | M  | $J_{H-H}/Hz$ | $\delta_C$ | HSQC            | HMBC H to C      | H-H COSY   |
|----------|------------|----|--------------|------------|-----------------|------------------|------------|
| 3''      | 1.99       | t  | 2.6          | 69.5       | CH              | 4'', 5'', 6''    | 5''        |
| 4''      | -          | -  | -            | 83.1       | -               | -                | -          |
| 5''      | 2.29       | m  | -            | 15.4       | CH <sub>2</sub> | 3'', 4'', 6''    | 3'', 6''   |
| 6''      | 1.87       | m  | -            | 27.6       | CH <sub>2</sub> | -                | 5''        |
| 7''      | 4.19       | t  | 6.3          | 62.9       | -               | -                | -          |
| 8''      | -          | -  | -            | 173.6      | CH <sub>2</sub> | 7'', 9'', 11''   | 9''        |
| 9a''     | 1.48       | m  | -            | 28.6       | CH <sub>2</sub> | 8'', 12''        | 8''        |
| 9b''     | 1.73       | m  | -            | -          | -               | -                | -          |
| 10''     | 1.28       | m  | -            | 29.7       | CH <sub>2</sub> | -                | -          |
| 11''     | 1.73       | m  | -            | 24.7       | CH <sub>2</sub> | 9'', 12''        | 12''       |
| 12''     | 1.71       | m  | -            | 24.8       | CH              | 9''              | 11'', 15'' |
| 13a''    | 2.78       | d  | 12.8         | 40.3       | CH <sub>2</sub> | 12'', 14''       | 14''       |
| 13b''    | 2.92       | dd | 5.0, 12.8    | -          | -               | -                | -          |
| 14''     | 4.53       | m  | -            | 60.1       | CH              | 12'', 13'', 17'' | 13'', 15'' |
| 15''     | 4.33       | m  | -            | 62.0       | CH              | 12'', 13'', 17'' | 12'', 14'' |
| 17''     | -          | -  | -            | 163.6      | -               | -                | -          |

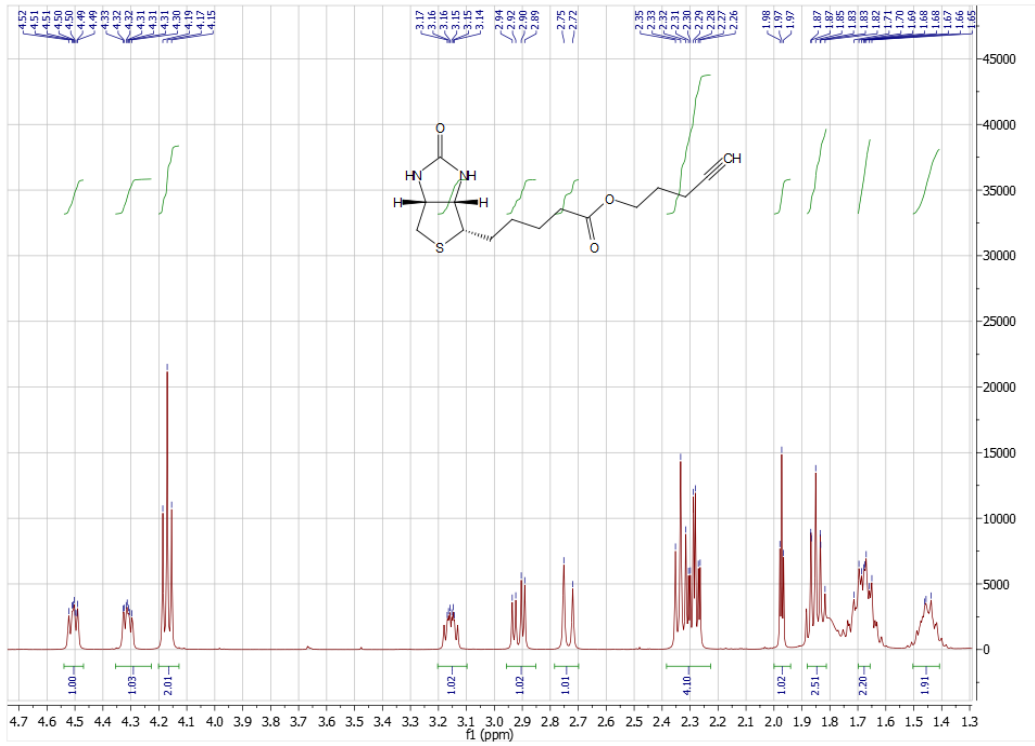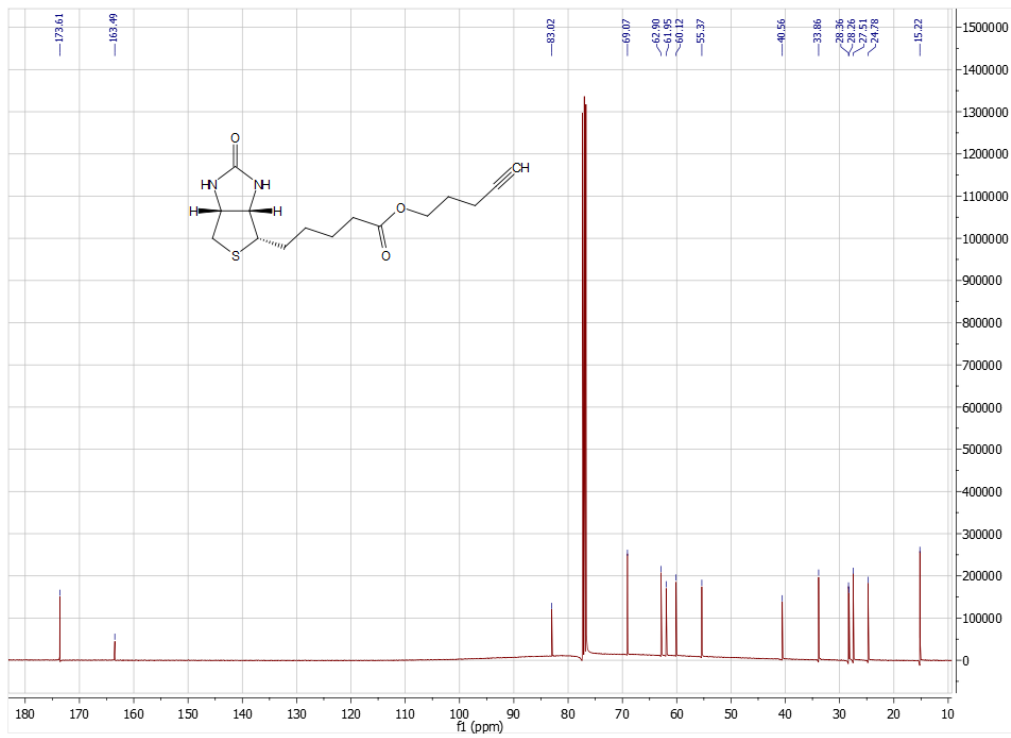

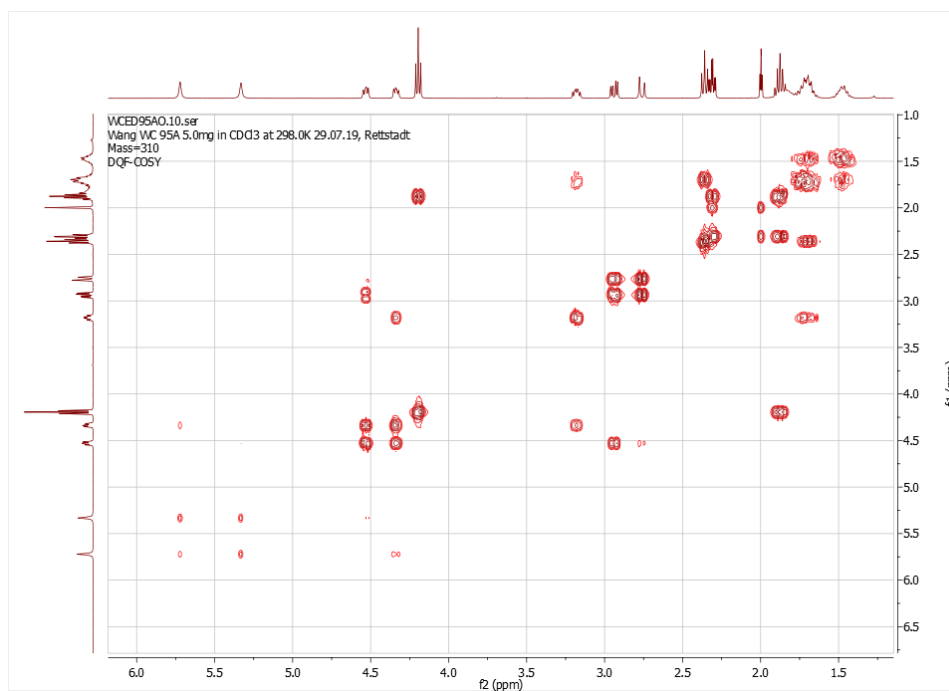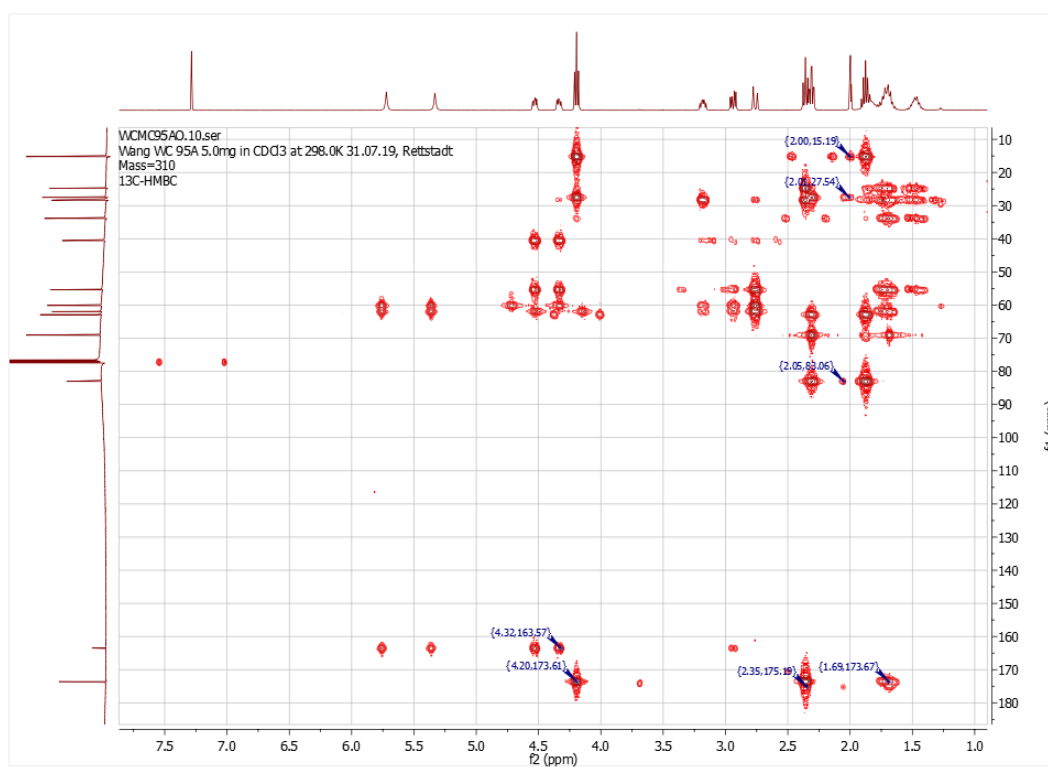

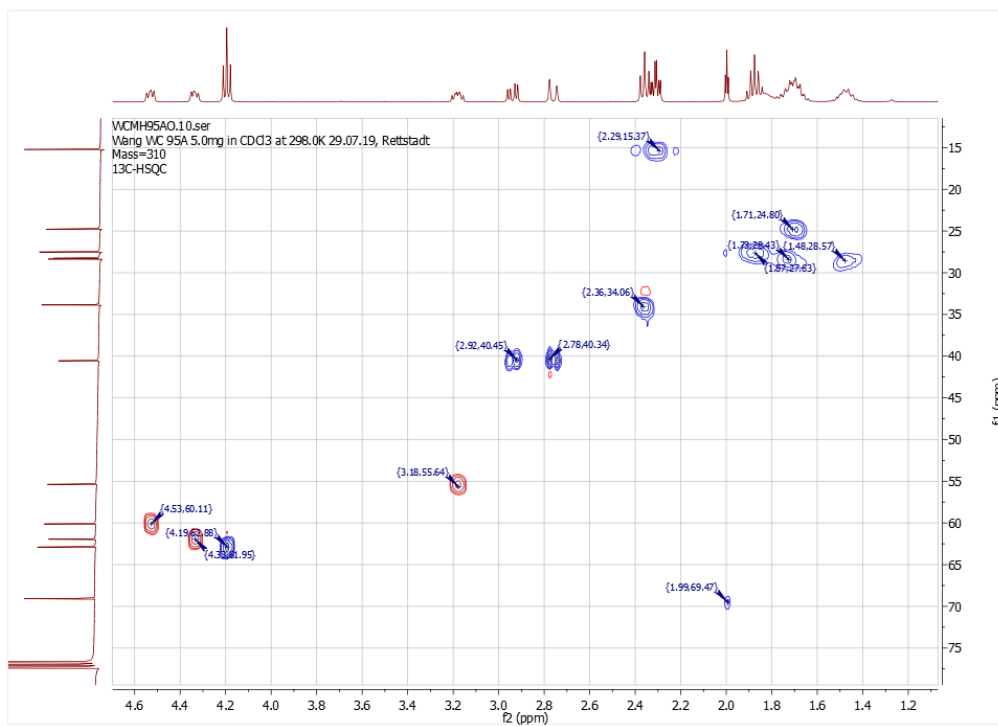



## 2.08 4'-Biotin-triazole-linked Cytochalasin H 7a

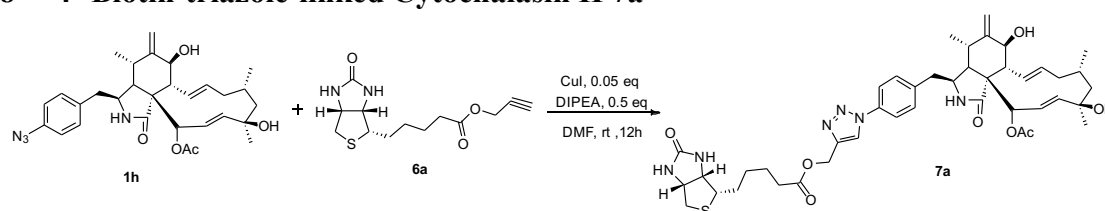

To a stirred solution of **1h** (10 mg, 0.019 mmol, 1.0 eq) and **6a** (10.7 mg, 0.038 mmol, 2.0 eq) in DMF (2 mL) was added CuI (0.2 mg, 0.95  $\mu$ mol, 0.05 eq) and DIPEA (1.2 mg, 9.5  $\mu$ mol, 0.5 eq). The mixture was stirred at room temperature for 12 hours under nitrogen and the solvent was removed *in vacuo*. The residue was dissolved in EtOAc (2 mL) and washed with water (2 mL x 2). The organic phase was dried over MgSO<sub>4</sub>, filtered and evaporated to dryness *in vacuo*. The residue was dissolved in MeOH and purified by LCMS to afford 8.6 mg of desired product (56.4%, 0.010 mmol) as a light yellow solid.

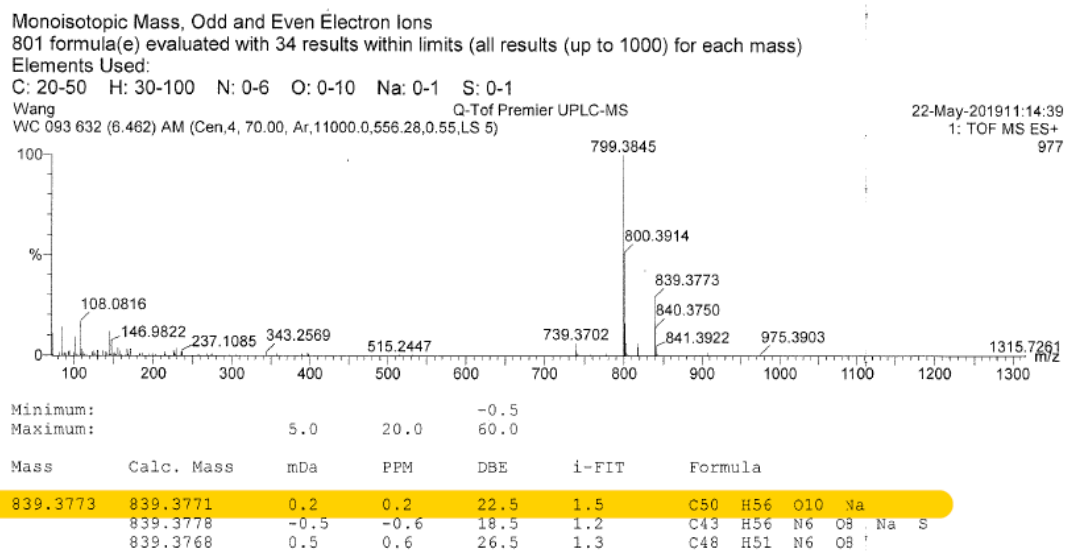

**HRMS ( $m/z$ ):** calculated for [C<sub>43</sub>H<sub>56</sub>N<sub>6</sub>O<sub>8</sub>S + Na]: 839.3778, found: 839.3773.

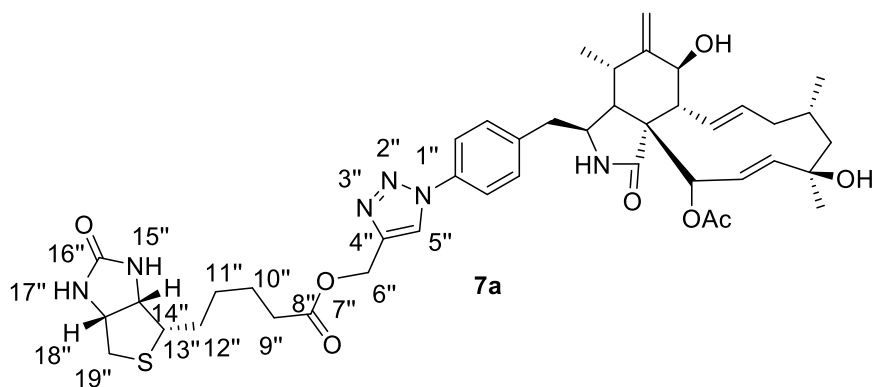

| Position | $\delta_H$ | M   | $J_{H-H}/\text{Hz}$ | $\delta_C$ | HSQC            | HMBC H to C                | H-H COSY   |
|----------|------------|-----|---------------------|------------|-----------------|----------------------------|------------|
| 1        | -          | -   | -                   | 174.8      | -               | -                          | -          |
| 3        | 3.33       | m   | -                   | 53.7       | CH              | 1', 4, 5                   | 4, 5, 10   |
| 4        | 2.15       | t   | 4.3                 | 50.5       | CH              | 3, 5                       | 3, 5, 10   |
| 5        | 2.82       | m   | -                   | 32.9       | CH              | 1', 3                      | 4, 11, 12  |
| 6        | -          | -   | -                   | 147.9      | -               | -                          | -          |
| 7        | 3.86       | d   | 10.8                | 69.6       | CH              | 5, 6, 8, 12, 13            | 8, 12      |
| 8        | 2.97       | m   | -                   | 47.2       | CH              | 1, 7, 9, 13, 21            | 7, 13      |
| 9        | -          | -   | -                   | 51.9       | -               | -                          | -          |
| 10a      | 2.74       | m   | -                   | 45.1       | CH <sub>2</sub> | 1', 3                      | 3, 4, 12   |
| 10b      | 2.94       | dd  | 4.8, 13.5           | -          | -               | -                          | -          |
| 11       | 1.07       | d   | 6.7                 | 14.4       | CH <sub>3</sub> | 4, 5, 6                    | 5          |
| 12a      | 5.15       | brs | -                   | 114.2      | CH <sub>2</sub> | 5, 6, 7                    | 5, 7, 11   |
| 12b      | 5.39       | brs | -                   | -          | -               | -                          | -          |
| 13       | 5.74       | ddd | 1.4, 9.6, 15.5      | 127.0      | CH              | 7, 8, 15                   | 8, 14, 15  |
| 14       | 5.42       | ddd | 4.8, 10.3, 15.5     | 138.8      | CH              | 9, 15                      | 13, 15     |
| 15a      | 1.82       | m   | -                   | 42.8       | CH <sub>2</sub> | 13, 14, 16, 17             | 13, 14,    |
| 15b      | 2.06       | m   | -                   | -          | -               | -                          | -          |
| 16       | 1.82       | m   | -                   | 28.5       | CH              | 13, 14, 17                 | 22         |
| 17a      | 1.61       | m   | -                   | 53.8       | CH <sub>2</sub> | 18, 19                     | -          |
| 17b      | 1.91       | m   | -                   | -          | -               | -                          | -          |
| 18       | -          | -   | -                   | 74.3       | -               | -                          | -          |
| 19       | 5.58       | brs | -                   | 138.2      | CH              | -                          | 20         |
| 20       | 5.88       | dd  | 2.7, 16.5           | 125.9      | CH              | 18, 19                     | 19         |
| 21       | 5.52       | brs | -                   | 77.4       | CH              | 8, 9, 19, 20, 23           | -          |
| 22       | 1.06       | d   | 6.5                 | 26.5       | CH <sub>3</sub> | 15, 16, 17                 | 16         |
| 23       | 1.35       | s   | -                   | 31.2       | CH <sub>3</sub> | 17, 18, 19                 | -          |
| 1'       | -          | -   | -                   | 130.6      | -               | -                          | -          |
| 2' 6'    | 7.33       | d   | 8.2                 | 130.6      | 2 x CH          | 3', 4', 5', 10             | 3', 5'     |
| 3' 5'    | 7.75       | d   | 8.2                 | 120.9      | 2 x CH          | 1', 4'                     | 2', 6'     |
| 4'       | -          | -   | -                   | 138.2      | -               | -                          | -          |
| 24       | -          | -   | -                   | 170.2      | -               | -                          | -          |
| 25       | 2.27       | s   | -                   | 21.0       | CH <sub>3</sub> | 21, 24                     | -          |
| 4''      | -          | -   | -                   | 145.1      | -               | -                          | -          |
| 5''      | 8.16       | s   | -                   | 119.6      | CH              | 4''                        | -          |
| 6''      | 5.34       | s   | -                   | 25.5       | CH <sub>2</sub> | 4'', 5'', 7''              | 7''        |
| 8''      | -          | -   | -                   | 173.5      | -               | -                          | -          |
| 9''      | 2.43       | t   | 6.9                 | 33.6       | CH <sub>2</sub> | 8'', 10''                  | 10'', 12'' |
| 10''     | 1.67       | m   | -                   | 28.3       | CH <sub>2</sub> | 8'', 9'', 11'', 12'', 13'' | 9'', 11''  |

|       |      |    |          |       |                 |                          |            |
|-------|------|----|----------|-------|-----------------|--------------------------|------------|
| 11''  | 1.48 | m  | -        | 28.1  | CH <sub>2</sub> | 9'', 10'', 12'',<br>13'' | 10''       |
| 12''  | 1.73 | m  | -        | 24.6  | CH <sub>2</sub> | 11'', 13'', 14'',        | 9''        |
| 13''  | 3.15 | m  | -        | 55.3  | CH              | 11'', 14''               | 14''       |
| 14''  | 4.25 | dd | 4.4, 7.8 | 61.6  | CH              | 16''                     | 13'', 18'' |
| 16''  | -    | -  | -        | 163.3 | -               | -                        | -          |
| 18''  | 4.48 | m  | -        | 60.1  | CH              | 13'', 16''               | 14'', 19'' |
| 19a'' | 2.69 | m  | -        | 40.6  | CH <sub>2</sub> | 13'', 18''               | 18''       |
| 19b'' | 2.94 | m  | -        | -     | -               | -                        | -          |

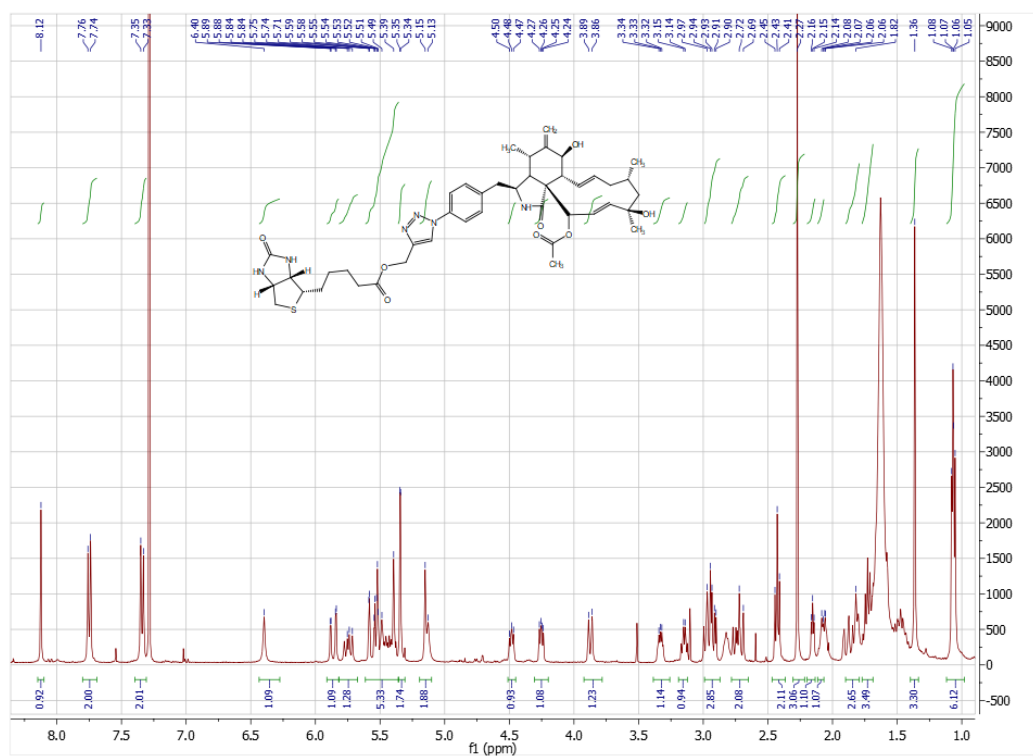

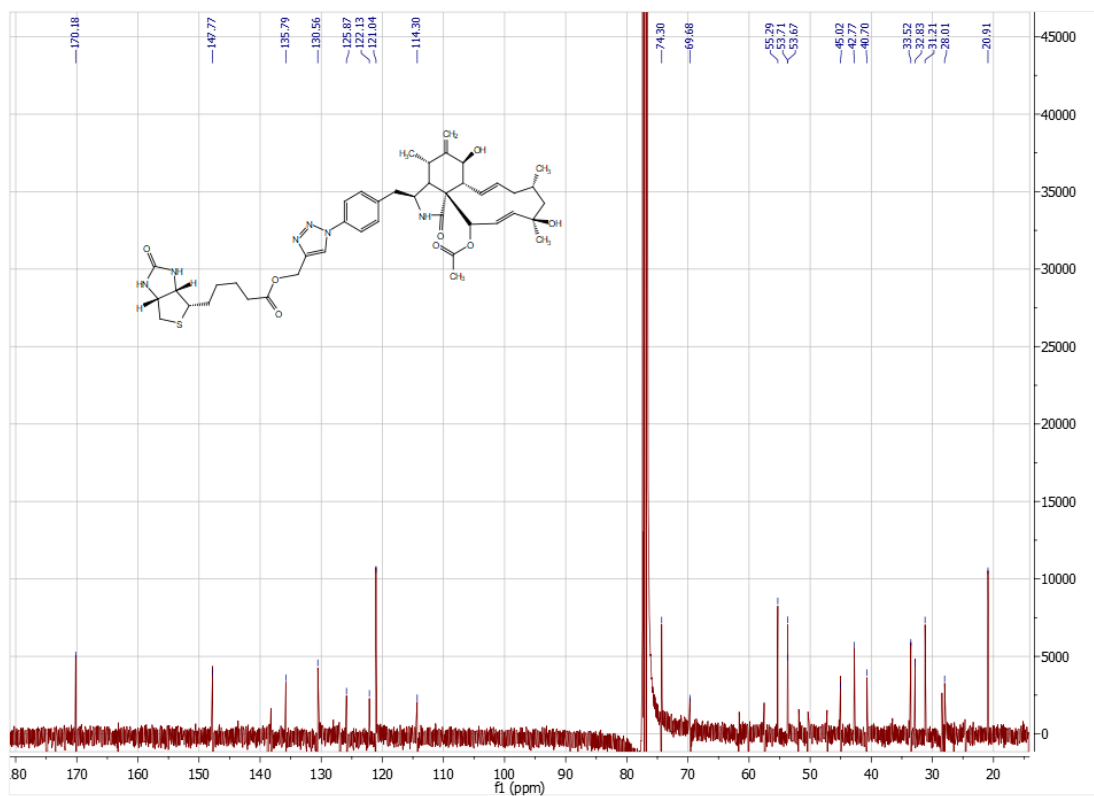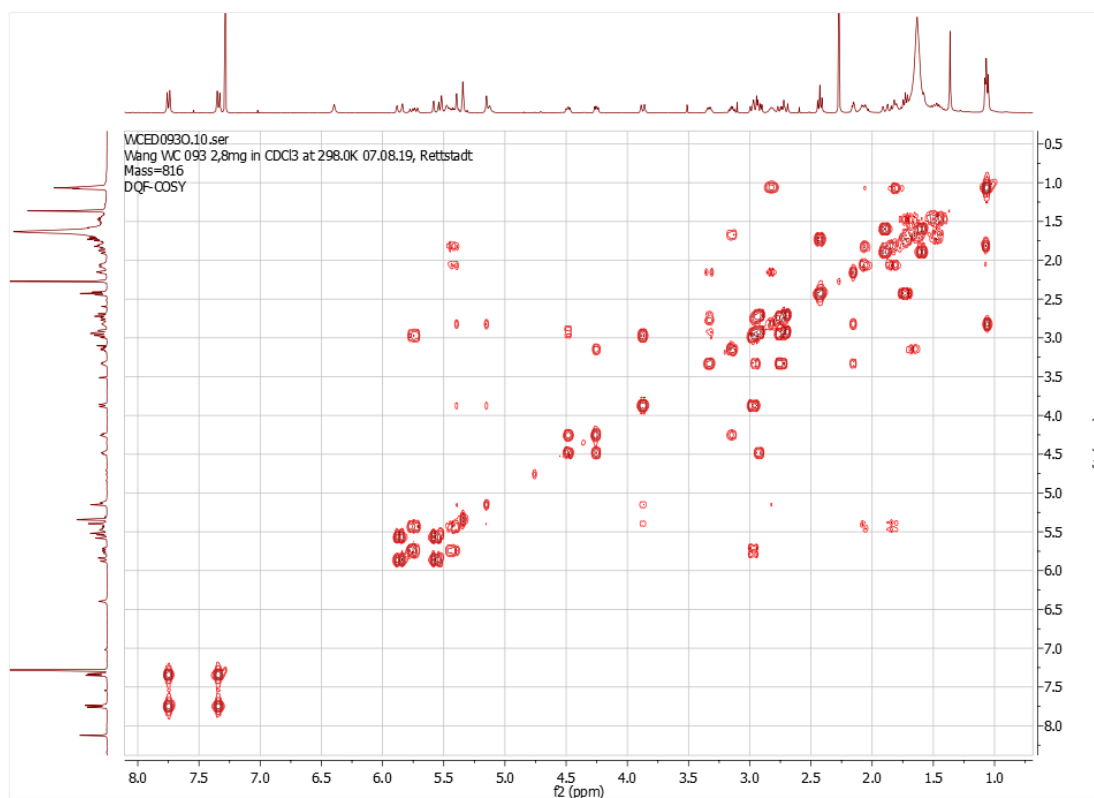

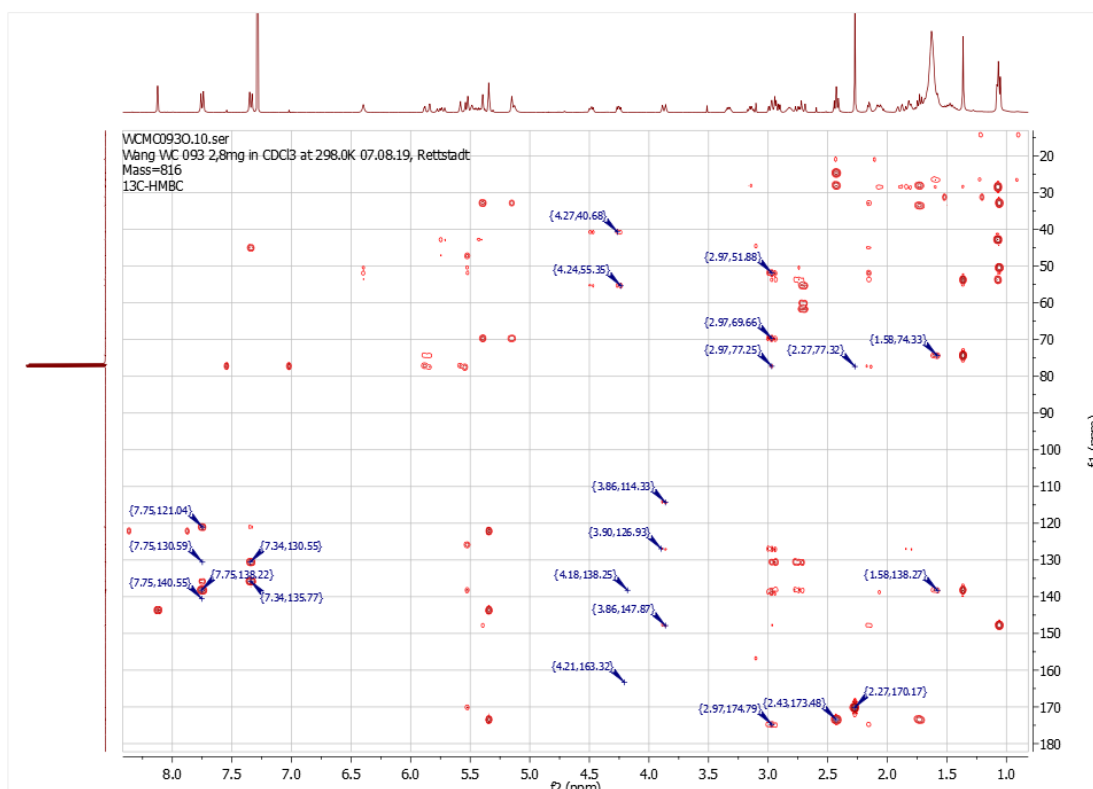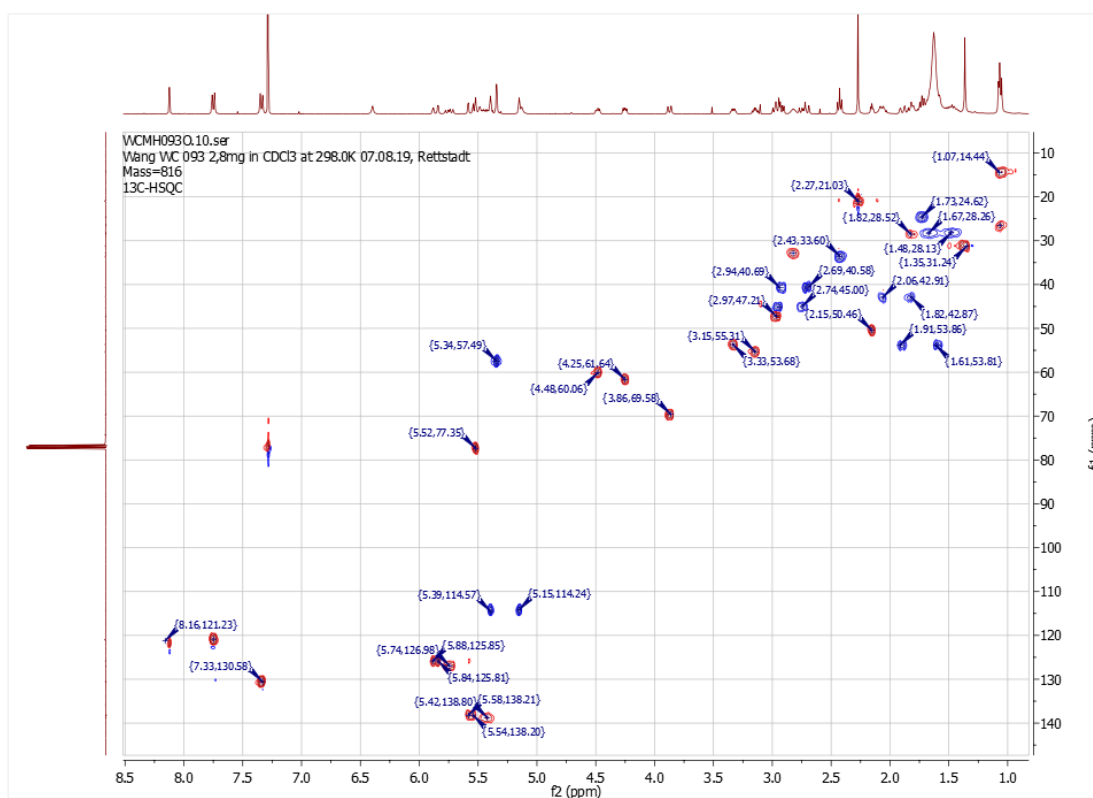

## 2.09 4'-Biotin-triazole-linked Cytochalasin H 7b

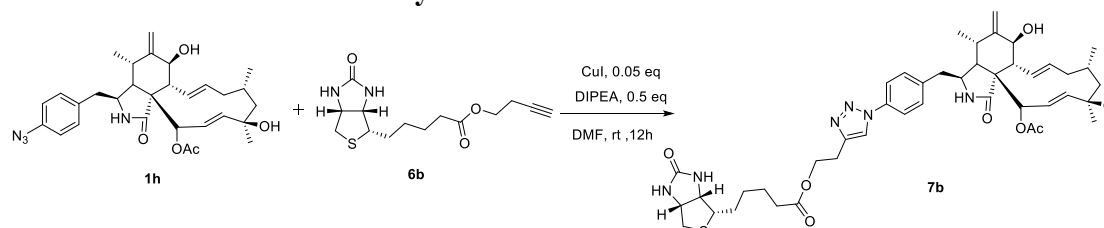

To a stirred solution of **1h** (10 mg, 0.019 mmol, 1.0 eq) and **6b** (11.2 mg, 0.038 mmol, 2.0 eq) in DMF (2 mL) was added CuI (0.2 mg, 0.95  $\mu$ mol, 0.05 eq) and DIPEA (1.2 mg, 9.5  $\mu$ mol, 0.5 eq). The mixture was stirred at room temperature for 12 hours under nitrogen and the solvent was removed *in vacuo*. The residue was dissolved in EtOAc (2 mL) and washed with water (2 mL  $\times$  2). The organic phase was dried over MgSO<sub>4</sub>, filtered and evaporated to dryness *in vacuo*. The residue was dissolved in MeOH and purified by LCMS to afford 9.6 mg of desired product (61.9%, 0.011 mmol) as a white solid.

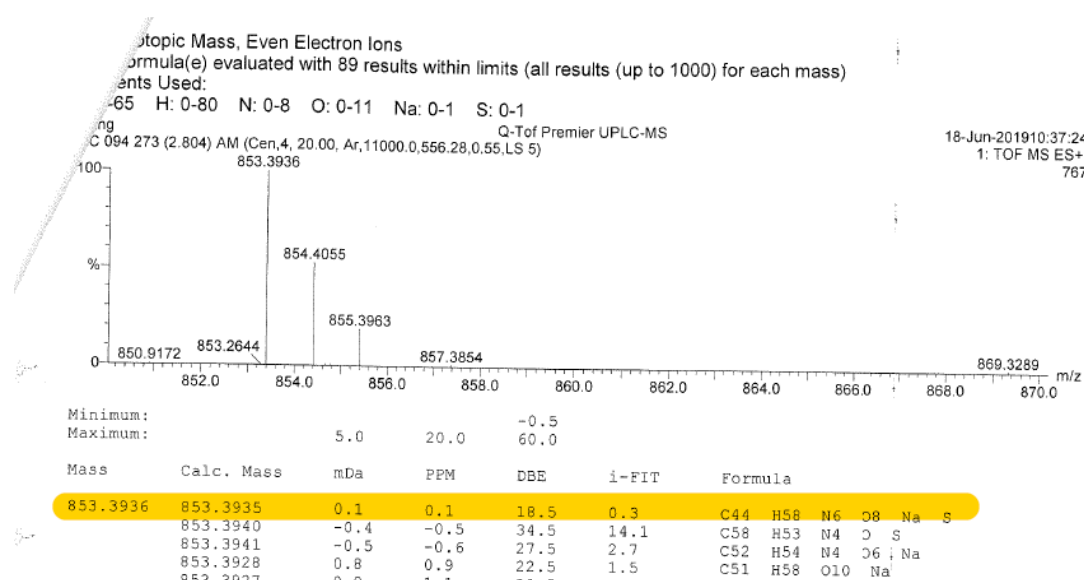

HRMS ( $m/z$ ): calculated for [C<sub>44</sub>H<sub>58</sub>N<sub>6</sub>O<sub>8</sub>S + Na]: 853.3935, found: 853.3936.

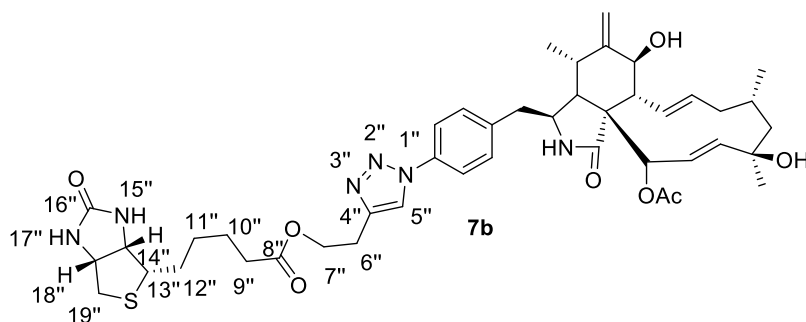

| Position | $\delta_H$ | M   | $J_{H-H}/\text{Hz}$ | $\delta_C$ | HSQC            | HMBC H to C                   | H-H COSY   |
|----------|------------|-----|---------------------|------------|-----------------|-------------------------------|------------|
| 1        | -          | -   | -                   | 175.2      | -               | -                             | -          |
| 3        | 3.33       | m   | -                   | 53.9       | CH              | 1', 4, 5                      | 4, 5, 10   |
| 4        | 2.13       | m   | -                   | 50.4       | CH              | 3, 5                          | 3, 5, 10   |
| 5        | 2.83       | m   | -                   | 32.9       | CH              | 1', 3                         | 4, 11, 12  |
| 6        | -          | -   | -                   | 147.7      | -               | -                             | -          |
| 7        | 3.87       | dd  | 1.7, 11.0           | 69.5       | CH              | 5, 6, 8, 12, 13               | 8, 12      |
| 8        | 2.97       | dd  | 5.0, 11.0           | 47.1       | CH              | 1, 7, 9, 13, 21               | 7, 13      |
| 9        | -          | -   | -                   | 52.4       | -               | -                             | -          |
| 10a      | 2.73       | dd  | 1.1, 12.9           | 45.1       | CH <sub>2</sub> | 1', 3                         | 3, 4, 12   |
| 10b      | 2.93       | dd  | 5.0, 12.9           | -          | -               | -                             | -          |
| 11       | 1.10       | d   | 6.7                 | 14.3       | CH <sub>3</sub> | 4, 5, 6                       | 5          |
| 12a      | 5.15       | brs | -                   | 114.1      | CH <sub>2</sub> | 5, 6, 7                       | 5, 7, 11   |
| 12b      | 5.40       | brs | -                   | -          | -               | -                             | -          |
| 13       | 5.74       | m   | -                   | 126.8      | CH              | 7, 8, 15                      | 8, 14, 15  |
| 14       | 5.44       | m   | -                   | 138.8      | CH              | 9, 15                         | 13, 15     |
| 15a      | 1.80       | m   | -                   | 42.7       | CH <sub>2</sub> | 13, 14, 16, 17                | 13, 14,    |
| 15b      | 2.06       | m   | -                   | -          | -               | -                             | -          |
| 16       | 1.80       | m   | -                   | 28.6       | CH              | 13, 14, 17                    | 22         |
| 17a      | 1.61       | m   | -                   | 53.6       | CH <sub>2</sub> | 18, 19                        | -          |
| 17b      | 1.88       | m   | -                   | -          | -               | -                             | -          |
| 18       | -          | -   | -                   | 74.2       | -               | -                             | -          |
| 19       | 5.55       | brs | -                   | 138.2      | CH              | -                             | 20         |
| 20       | 5.87       | dd  | 2.9, 16.4           | 125.7      | CH              | 18, 19                        | 19         |
| 21       | 5.49       | brs | -                   | 77.3       | CH              | 8, 9, 19, 20, 23              | -          |
| 22       | 1.07       | d   | 6.5                 | 26.5       | CH <sub>3</sub> | 15, 16, 17                    | 16         |
| 23       | 1.35       | s   | -                   | 31.2       | CH <sub>3</sub> | 17, 18, 19                    | -          |
| 1'       | -          | -   | -                   | 130.7      | -               | -                             | -          |
| 2' 6'    | 7.34       | d   | 8.2                 | 130.6      | 2 x CH          | 3', 4', 5', 10                | 3', 5'     |
| 3' 5'    | 7.74       | d   | 8.2                 | 120.6      | 2 x CH          | 1', 4'                        | 2', 6'     |
| 4'       | -          | -   | -                   | 137.9      | -               | -                             | -          |
| 24       | -          | -   | -                   | 170.1      | -               | -                             | -          |
| 25       | 2.26       | s   | -                   | 20.9       | CH <sub>3</sub> | 21, 24                        | -          |
| 4''      | -          | -   | -                   | 145.1      | -               | -                             | -          |
| 5''      | 7.93       | s   | -                   | 119.6      | CH              | 4''                           | -          |
| 6''      | 3.18       | m   | -                   | 25.6       | CH <sub>2</sub> | 4'', 5'', 7''                 | 7''        |
| 7''      | 4.21       | m   | -                   | 61.7       | CH <sub>2</sub> | 6'', 8''                      | 6''        |
| 8''      | -          | -   | -                   | 173.4      | -               | -                             | -          |
| 9''      | 2.39       | m   | -                   | 33.7       | CH <sub>2</sub> | 8'', 10''                     | 10'', 12'' |
| 10''     | 1.71       | m   | -                   | 28.2       | CH <sub>2</sub> | 8'', 9'', 11'',<br>12'', 13'' | 9'', 11''  |
| 11''     | 1.46       | m   | -                   | 28.1       | CH <sub>2</sub> | 9'', 10'', 12'',<br>13''      | 10''       |
| 12''     | 1.69       | m   | -                   | 24.6       | CH <sub>2</sub> | 11'', 13'', 14'',             | 9''        |

|       |      |   |   |       |                 |            |            |
|-------|------|---|---|-------|-----------------|------------|------------|
| 13''  | 3.16 | m | - | 55.2  | CH              | 11'', 14'' | 14''       |
| 14''  | 4.34 | m | - | 61.8  | CH              | 16''       | 13'', 18'' |
| 16''  | -    | - | - | 163.2 | -               | -          | -          |
| 18''  | 4.53 | m | - | 60.0  | CH              | 13'', 16'' | 14'', 19'' |
| 19a'' | 2.72 | m | - | 40.5  | CH <sub>2</sub> | 13'', 18'' | 18''       |
| 19b'' | 2.95 | m | - | -     | -               | -          | -          |

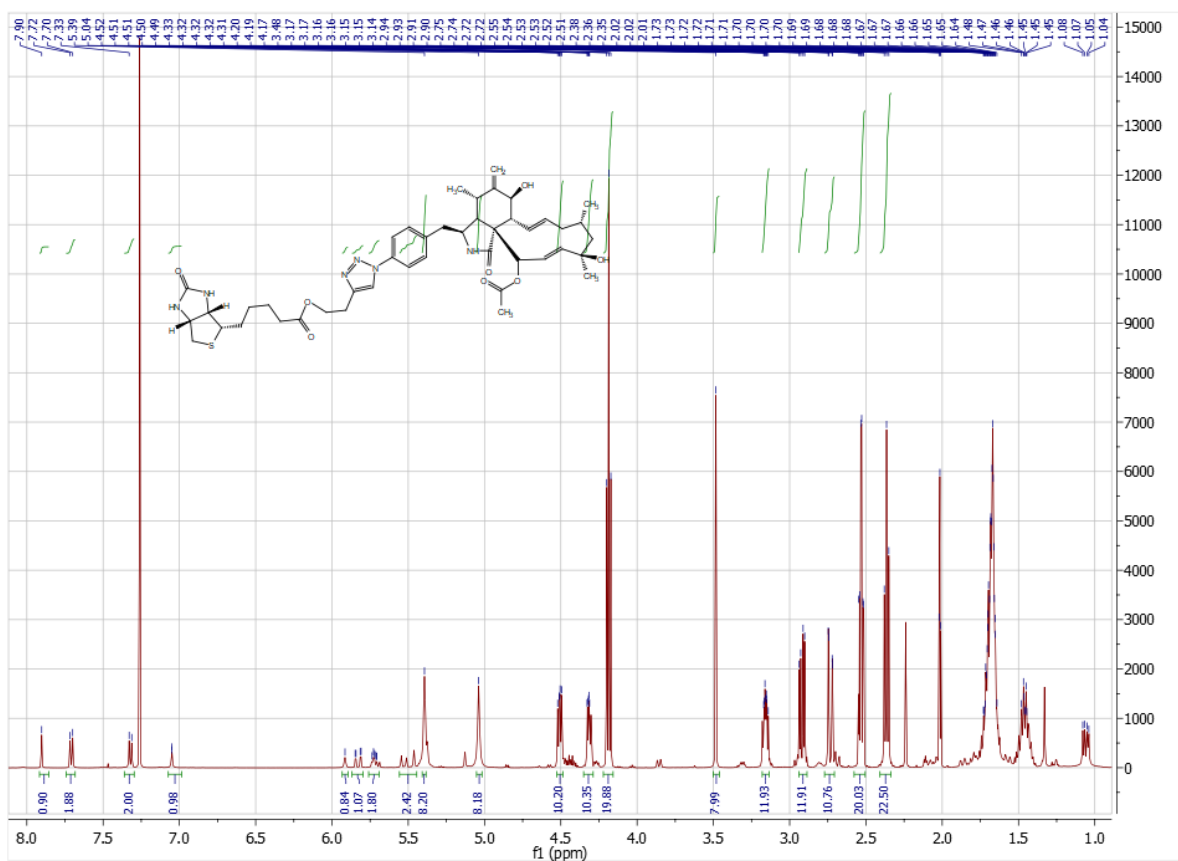



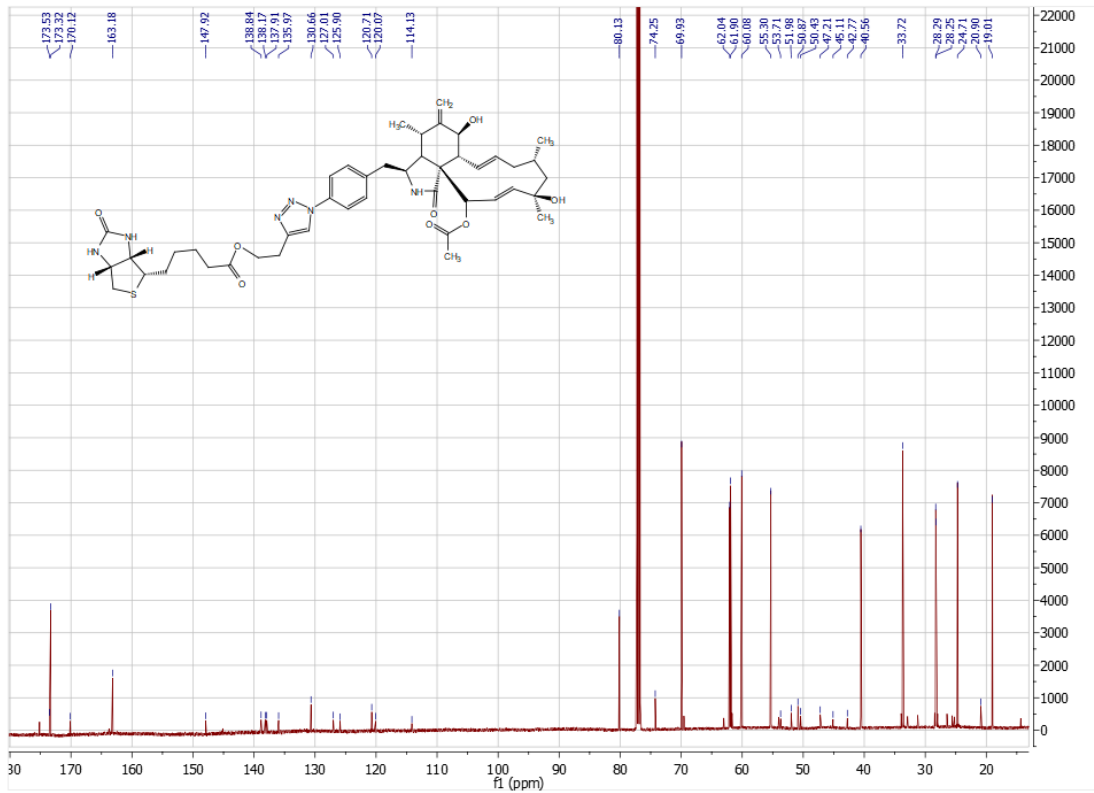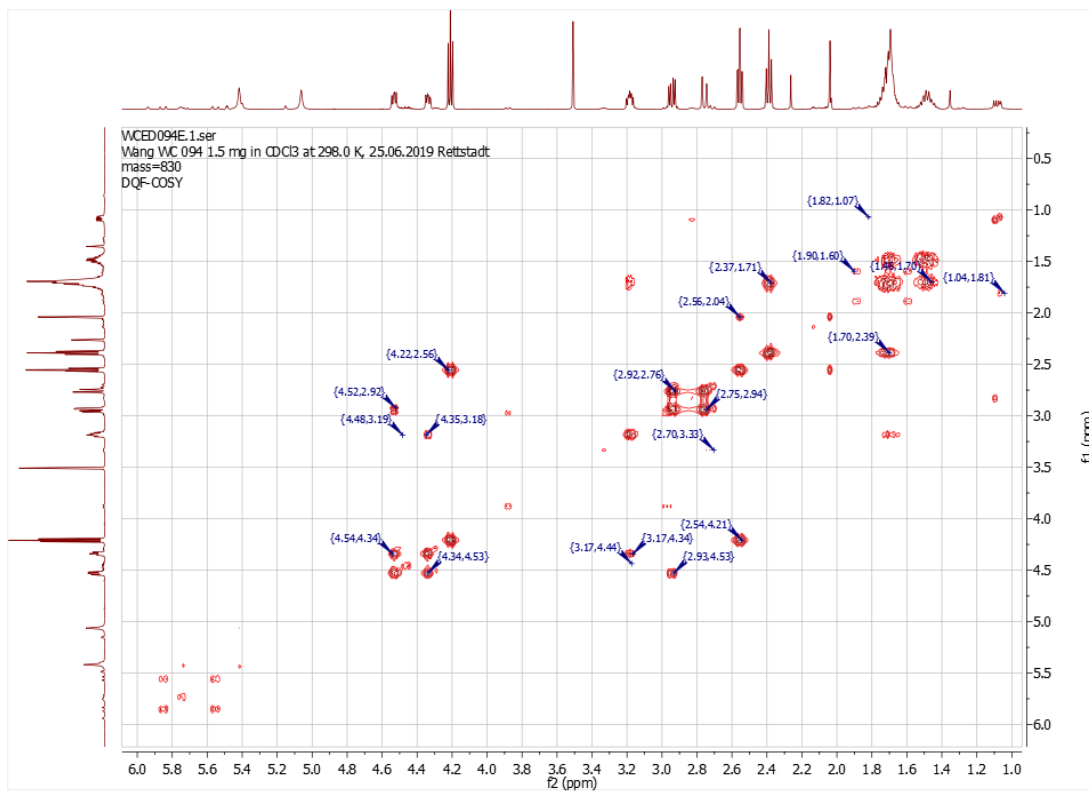

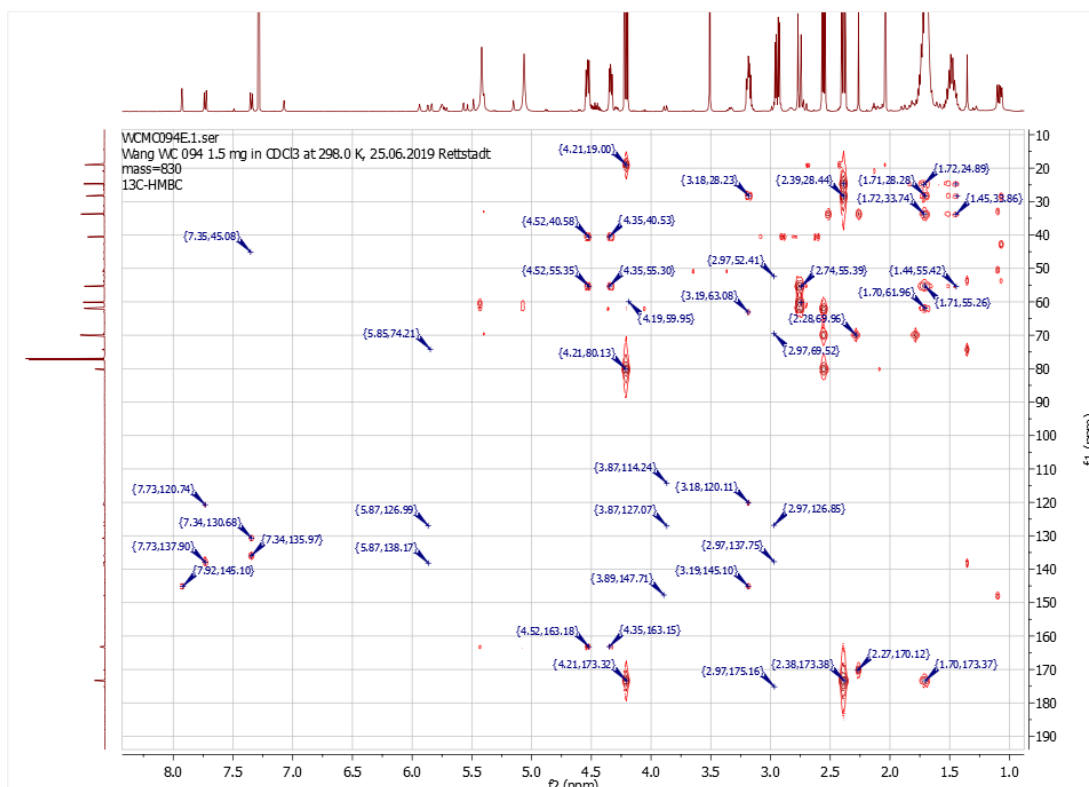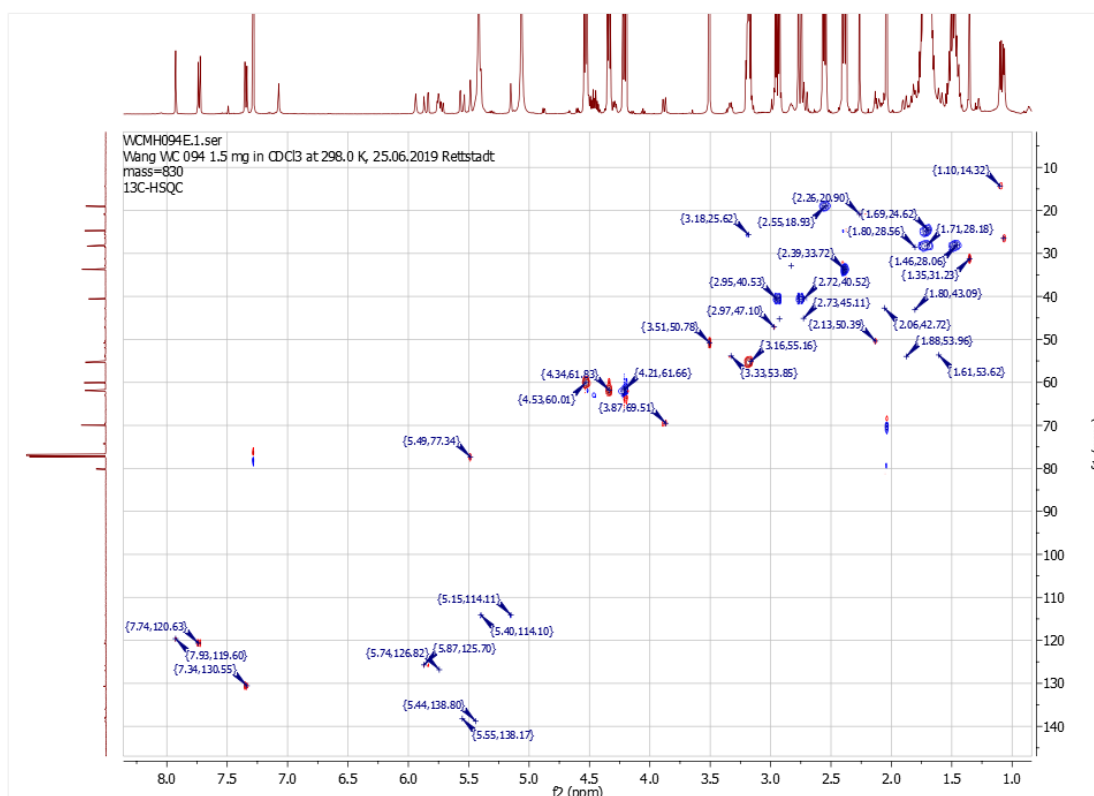

## 2.10 4'-Biotin-triazole-linked Cytochalasin H 7c

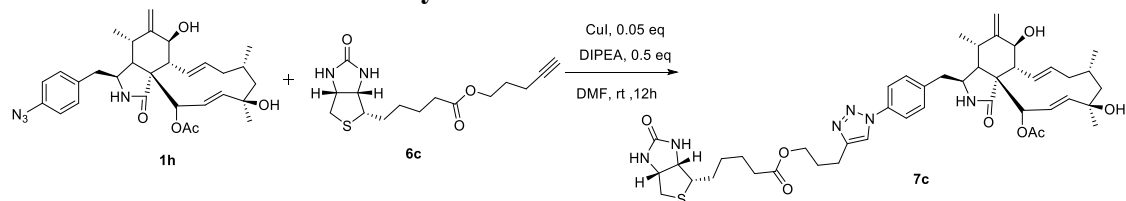

To a stirred solution of **1h** (10 mg, 0.019 mmol, 1.0 eq) and **6c** (11.7 mg, 0.038 mmol, 2.0 eq) in DMF (2 mL) was added CuI (0.2 mg, 0.95  $\mu$ mol, 0.05 eq) and DIPEA (1.2 mg, 9.5  $\mu$ mol, 0.5 eq). The mixture was stirred at room temperature for 12 hours under nitrogen and the solvent was removed *in vacuo*. The residue was dissolved in EtOAc (2 mL) and washed with water (2 mL x 2). The organic phase was dried over MgSO<sub>4</sub>, filtered and evaporated to dryness *in vacuo*. The residue was dissolved in MeOH and purified by LCMS to afford 10.1 mg of desired product (63.8%, 0.011 mmol) as a white yellow solid.

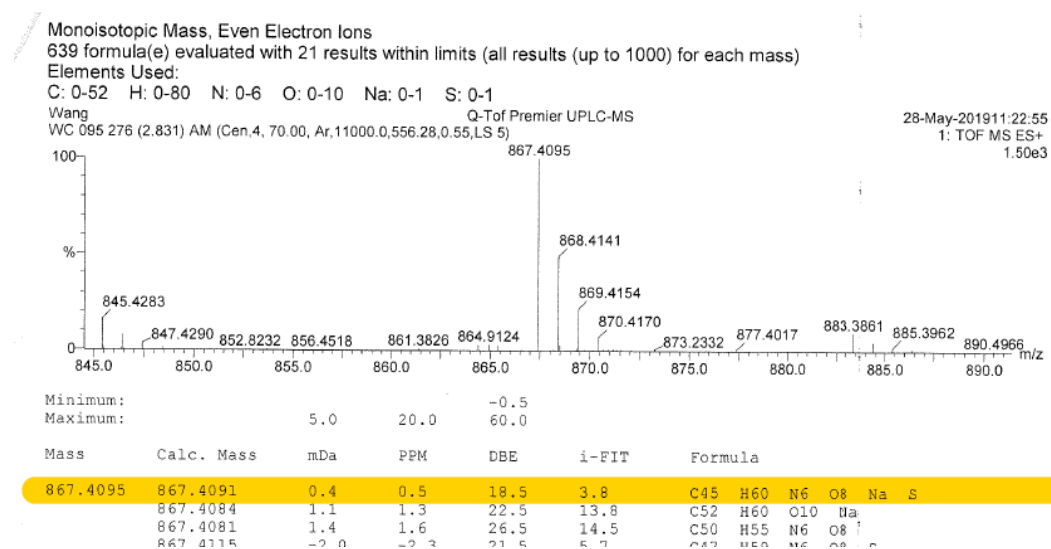

HRMS ( $m/z$ ): calculated for [C<sub>45</sub>H<sub>60</sub>N<sub>6</sub>O<sub>8</sub>S + Na]: 867.4091, found: 867.4095.

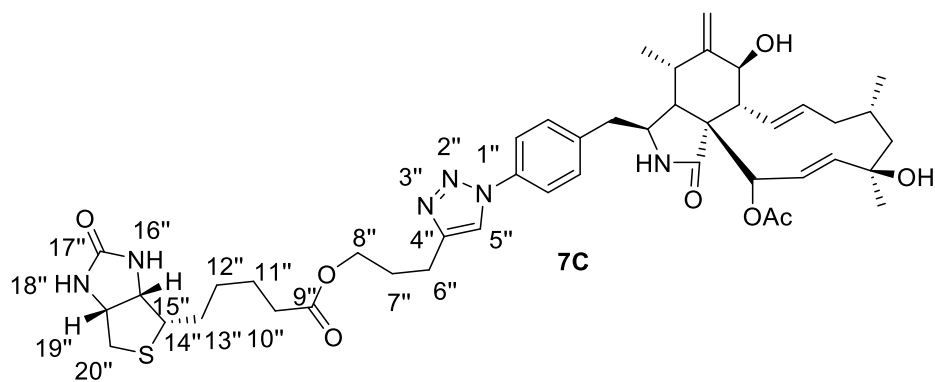

| Position | $\delta_H$ | M   | $J_{H-H}/\text{Hz}$ | $\delta_C$ | HSQC            | HMBC H to C      | H-H COSY  |
|----------|------------|-----|---------------------|------------|-----------------|------------------|-----------|
| 1        | -          | -   | -                   | 175.2      | -               | -                | -         |
| 3        | 3.33       | ddd | 0.9, 4.8, 9.6       | 53.7       | CH              | 1', 4, 5         | 4, 5, 10  |
| 4        | 2.15       | m   | -                   | 50.2       | CH              | 3, 5             | 3, 5, 10  |
| 5        | 2.81       | m   | -                   | 32.8       | CH              | 1', 3            | 4, 11, 12 |
| 6        | -          | -   | -                   | 147.7      | -               | -                | -         |
| 7        | 3.88       | dd  | 1.5, 10.8           | 69.7       | CH              | 5, 6, 8, 12, 13  | 8, 12     |
| 8        | 2.94       | m   | -                   | 47.2       | CH              | 1, 7, 9, 13, 21  | 7, 13     |
| 9        | -          | -   | -                   | 52.4       | -               | -                | -         |
| 10a      | 2.75       | m   | -                   | 45.0       | CH <sub>2</sub> | 1', 3            | 3, 4, 12  |
| 10b      | 2.93       | m   | -                   | -          | -               | -                | -         |
| 11       | 1.04       | d   | 6.6                 | 14.2       | CH <sub>3</sub> | 4, 5, 6          | 5         |
| 12a      | 5.14       | brs | -                   | 114.2      | CH <sub>2</sub> | 5, 6, 7          | 5, 7, 11  |
| 12b      | 5.39       | brs | -                   | -          | -               | -                | -         |
| 13       | 5.74       | ddd | 1.4, 9.6, 15.5      | 127.1      | CH              | 7, 8, 15         | 8, 14, 15 |
| 14       | 5.45       | ddd | 4.8, 10.3, 15.5     | 138.7      | CH              | 9, 15            | 13, 15    |
| 15a      | 1.82       | m   | -                   | 42.6       | CH <sub>2</sub> | 13, 14, 16, 17   | 13, 14,   |
| 15b      | 2.06       | m   | -                   | -          | -               | -                | -         |
| 16       | 1.80       | m   | -                   | 28.4       | CH              | 13, 14, 17       | 22        |
| 17a      | 1.61       | m   | -                   | 53.7       | CH <sub>2</sub> | 18, 19           | -         |
| 17b      | 1.91       | m   | -                   | -          | -               | -                | -         |
| 18       | -          | -   | -                   | 74.2       | -               | -                | -         |
| 19       | 5.54       | brs | -                   | 138.2      | CH              | -                | 20        |
| 20       | 5.84       | dd  | 2.7, 16.5           | 125.8      | CH              | 18, 19           | 19        |
| 21       | 5.52       | brs | -                   | 77.2       | CH              | 8, 9, 19, 20, 23 | -         |
| 22       | 1.06       | d   | 6.5                 | 26.2       | CH <sub>3</sub> | 15, 16, 17       | 16        |
| 23       | 1.36       | s   | -                   | 31.3       | CH <sub>3</sub> | 17, 18, 19       | -         |
| 1'       | -          | -   | -                   | 130.7      | -               | -                | -         |
| 2' 6'    | 7.33       | d   | 8.2                 | 130.4      | 2 x CH          | 3', 4', 5', 10   | 3', 5'    |
| 3' 5'    | 7.72       | d   | 8.2                 | 120.8      | 2 x CH          | 1', 4'           | 2', 6'    |
| 4'       | -          | -   | -                   | 137.9      | -               | -                | -         |
| 24       | -          | -   | -                   | 170.1      | -               | -                | -         |
| 25       | 2.27       | s   | -                   | 21.0       | CH <sub>3</sub> | 21, 24           | -         |
| 4''      | -          | -   | -                   | 147.6      | -               | -                | -         |
| 5''      | 7.83       | s   | -                   | 119.1      | CH              | 4''              | -         |
| 6''      | 2.13       | m   | -                   | 28.1       | CH <sub>2</sub> | 4'', 5'', 7''    | 7''       |
| 7''      | 1.89       | m   | -                   | 27.6       | CH <sub>2</sub> | 6'', 8''         | 6''       |
| 8''      | 4.18       | m   | -                   | 63.1       | CH <sub>2</sub> | -                | -         |
| 9''      | -          | -   | -                   | 173.6      | -               | -                | -         |
| 10''     | 2.37       | m   | -                   | 33.8       | CH <sub>2</sub> | 8'', 10''        | 9'', 11'' |
| 11''     | 1.70       | m   | -                   | 28.2       | CH <sub>2</sub> | 8'', 9'',        | 10''      |

|       |      |   |   |       |                 |                                              |                  |
|-------|------|---|---|-------|-----------------|----------------------------------------------|------------------|
| 12''  | 1.48 | m | - | 28.2  | CH <sub>2</sub> | 11'', 12'', 13''<br>9'', 10'', 12'',<br>13'' | 9''              |
| 13''  | 1.69 | m | - | 24.7  | CH              | 11'', 13'', 14''                             | 14''             |
| 14''  | 3.19 | m | - | 55.2  | CH              | 11''                                         | 13'', 15'', 18'' |
| 15''  | 4.33 | m | - | 61.7  | CH              | 14'', 17'', 20''                             | 14'', 19''       |
| 17''  | -    | - | - | 163.3 | -               | -                                            | -                |
| 19''  | 4.52 | m | - | 60.0  | CH              | 13'', 16''                                   | 15'', 20''       |
| 20a'' | 2.74 | m | - | 40.6  | CH <sub>2</sub> | 13'', 18''                                   | 18''             |
| 20b'' | 2.93 | m | - | -     | -               | -                                            | -                |

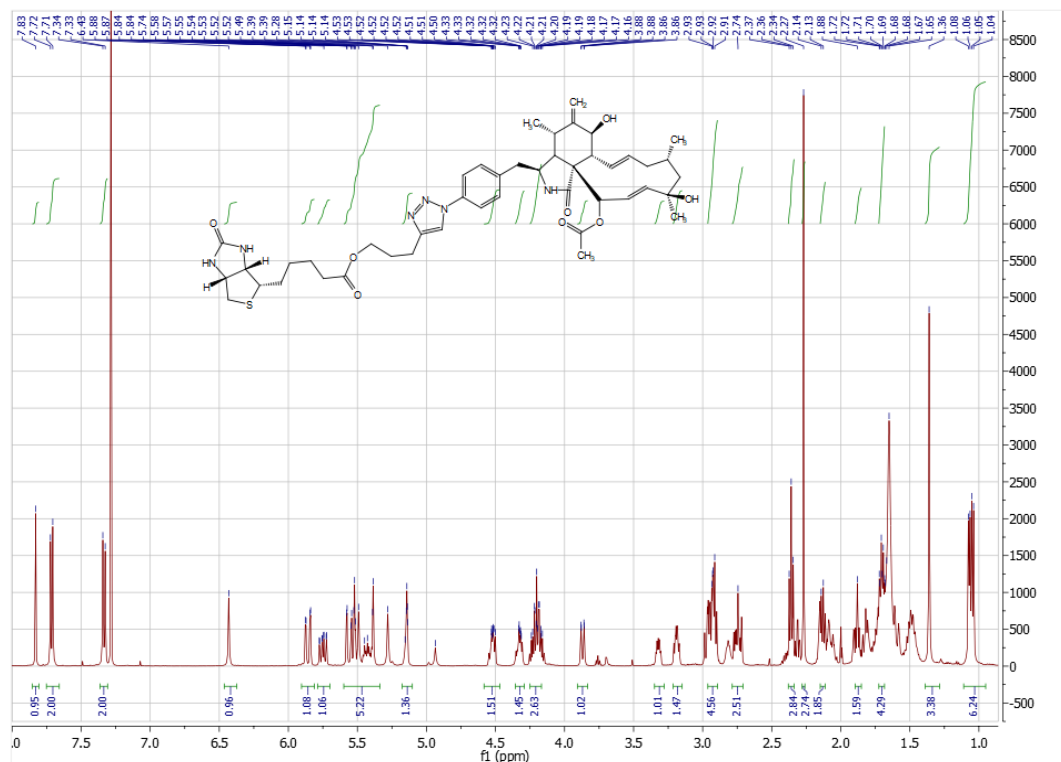

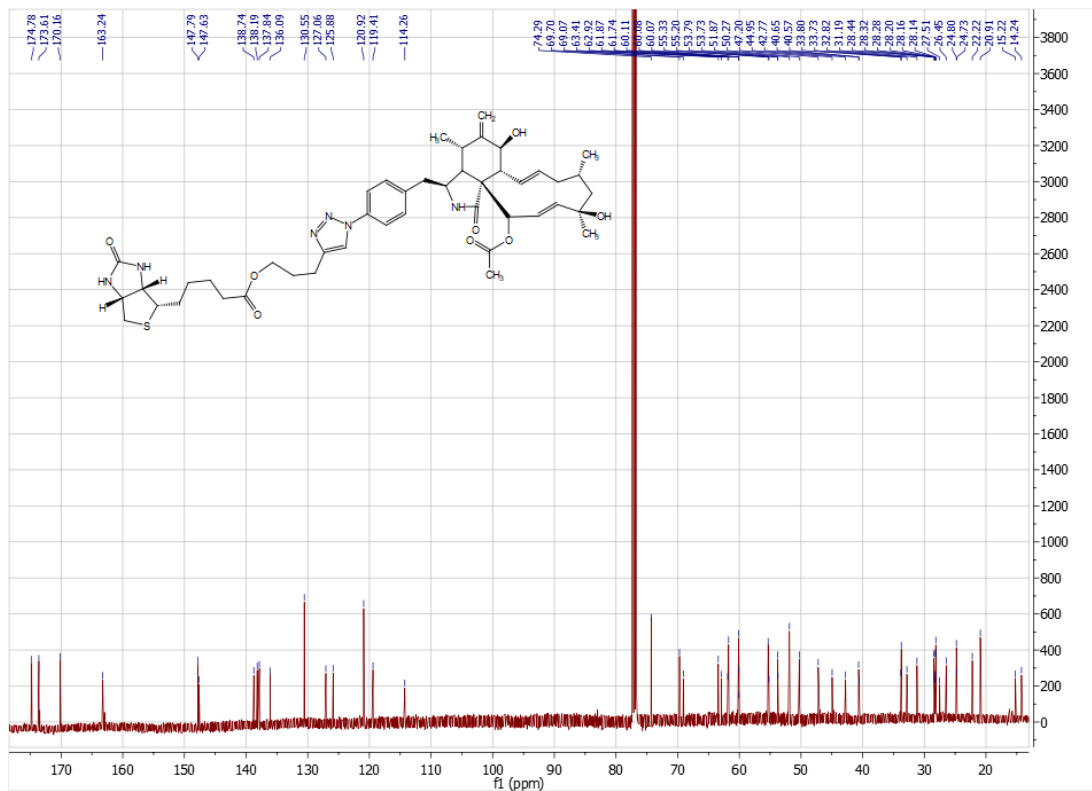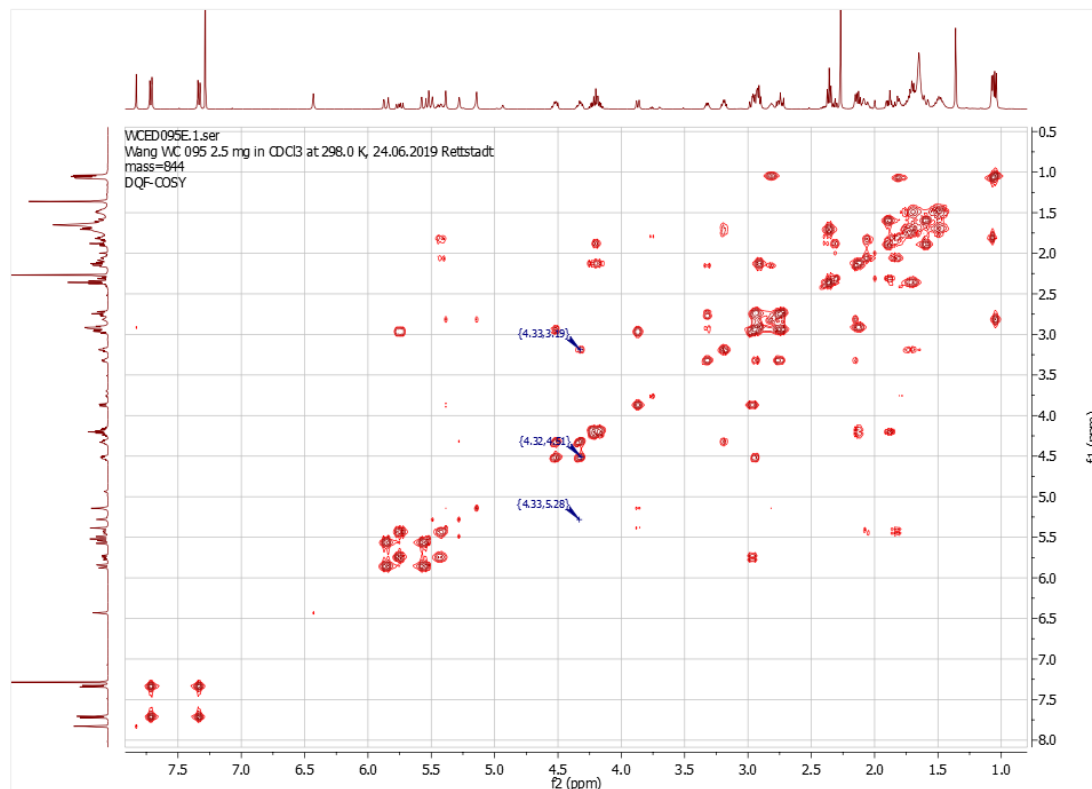

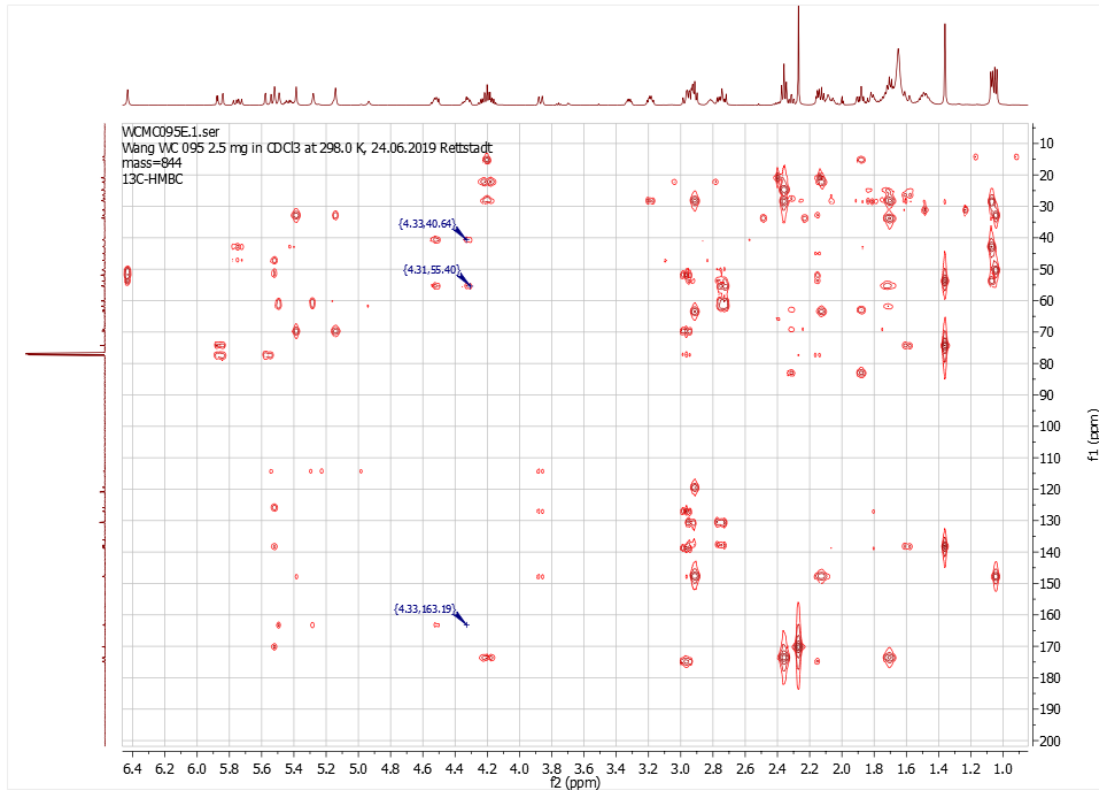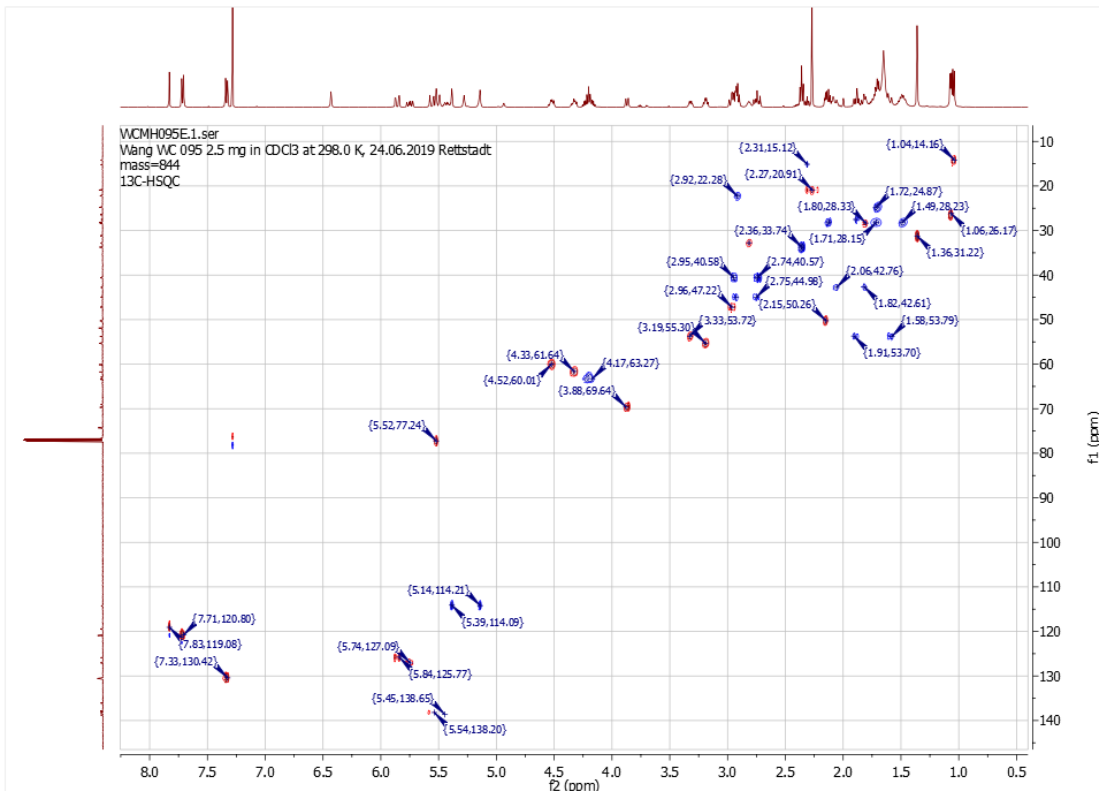

## 2.11 Biotin azide linker 8

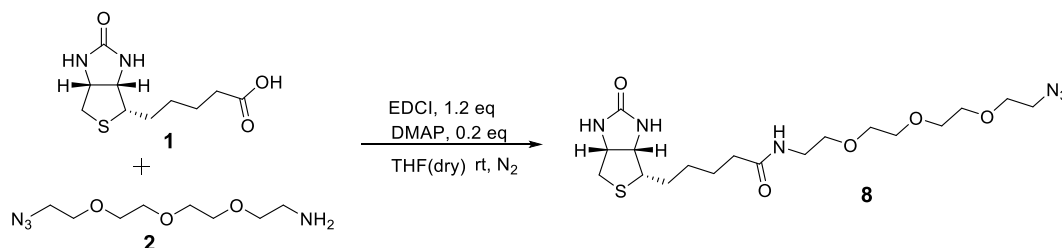

To a stirred solution of **biotin** (100.0 mg, 0.41 mmol, 1.0 eq, purchased from Sigma-Aldrich) and **2** (98.0 mg, 0.45 mmol, 1.1 eq, purchased from Acros) in dry THF (4 mL) was added EDCI (94.0 mg, 0.49 mmol, 1.2 eq) and DMAP (10.0 mg, 0.082 mmol, 0.2 eq). The mixture was stirred at room temperature for 12 hours under nitrogen and the solvent was removed *in vacuo*. The residue was dissolved in EtOAc (4mL) and washed with water (3 mL x 2). The organic phase was dried over MgSO<sub>4</sub>, filtered and evaporated to dryness *in vacuo*. The residue was dissolved in MeOH and purified by LCMS to afford 111.5 mg of desired product (61.3%, 0.239 mmol) as a white solid.

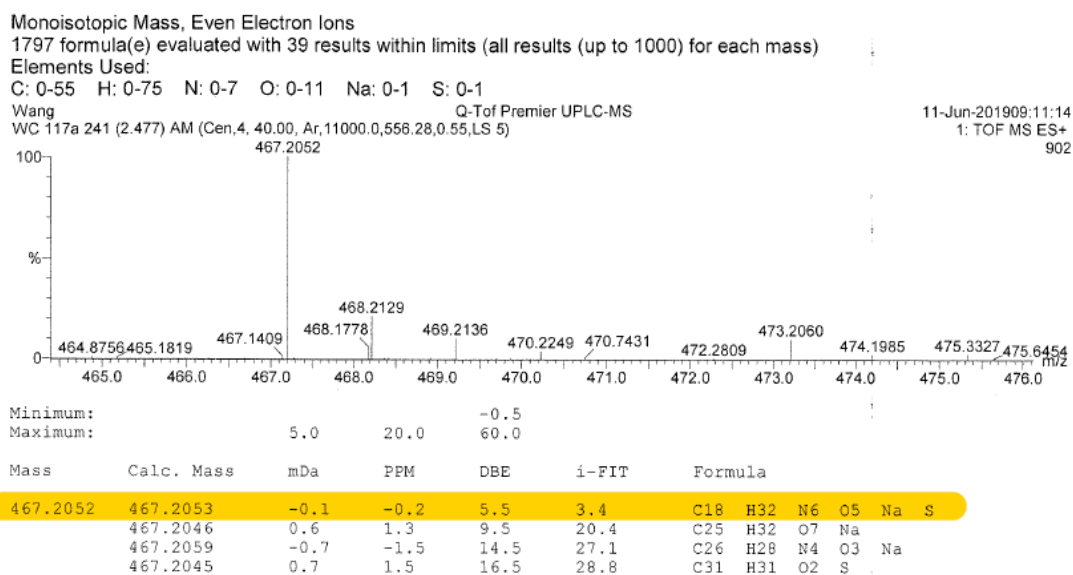

HRMS ( $m/z$ ): calculated for [C<sub>18</sub>H<sub>32</sub>N<sub>6</sub>O<sub>5</sub>S + Na]: 467.2053, found: 467.2052.



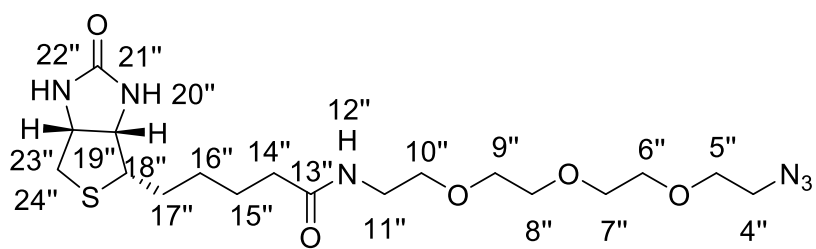

8

| Position | $\delta_H$ | M  | $J_{H-H}/\text{Hz}$ | $\delta_C$ | HSQC            | HMBC H to C               | H-H COSY   |
|----------|------------|----|---------------------|------------|-----------------|---------------------------|------------|
| 4''      | 3.40       | t  | 5.6                 | 50.5       | CH <sub>2</sub> | 5''                       | 5''        |
| 5''      | 3.65       | m  | -                   | 69.6       | CH <sub>2</sub> | 4'', 6''                  | 4''        |
| 6''9''   | 3.59       | m  | -                   | 69.8       | CH <sub>2</sub> | 7'', 8''                  | -          |
| 7'' 8''  | 3.62       | m  | -                   | 70.2       | CH <sub>2</sub> | 6'', 9''                  | -          |
| 10''     | 3.50       | m  | -                   | 69.3       | CH <sub>2</sub> | 9'', 11''                 | 11''       |
| 11''     | 3.32       | dd | 5.6, 11.2           | 38.3       | CH <sub>2</sub> | 10'', 13''                | 10''       |
| 12''     | 6.58       | s  | -                   | -          | -               | -                         | -          |
| 13''     | -          | -  | -                   | 172.8      | -               | -                         | -          |
| 14''     | 2.15       | dd | 1.0, 7.9            | 35.4       | CH <sub>2</sub> | 13'', 15'', 16''          | 15''       |
| 15''     | 1.62       | m  | -                   | 25.3       | CH <sub>2</sub> | 13'', 14'', 16''          | 14'', 16'' |
| 16''     | 1.39       | m  | -                   | 28.1       | CH <sub>2</sub> | 14'', 15'', 17'',<br>18'' | 15''       |
| 17''     | 1.57       | m  | -                   | 27.9       | CH <sub>2</sub> | 18'', 19''                | -          |
| 18''     | 3.18       | -  | -                   | 55.4       | CH              | 17''                      | -          |
| 19''     | 4.27       | m  | -                   | 61.4       | CH <sub>2</sub> | 18'', 21'', 23'',<br>24'' | 23''       |
| 20''     | 5.28       | s  | -                   | -          | -               | -                         | -          |
| 21''     | -          | -  | -                   | 163.2      | -               | -                         | -          |
| 22''     | 5.59       | s  | -                   | -          | -               | -                         | -          |
| 23''     | 4.46       | m  | -                   | 59.9       | CH              | 18'', 19'', 21'',<br>23'' | 19'', 24'' |
| 24a''    | 2.68       | d  | 12.7                | 40.1       | CH <sub>2</sub> | 18'', 19''                | 23''       |
| 24b''    | 2.90       | dd | 5.0, 12.7           | -          | -               | -                         | -          |



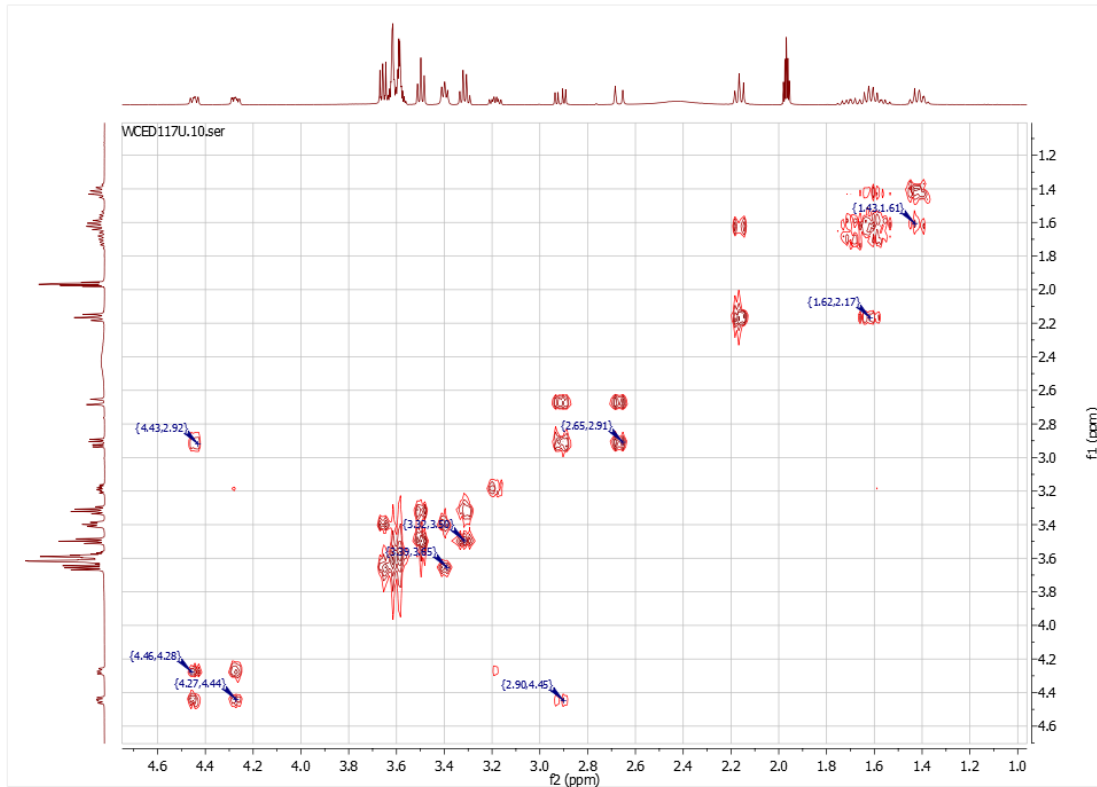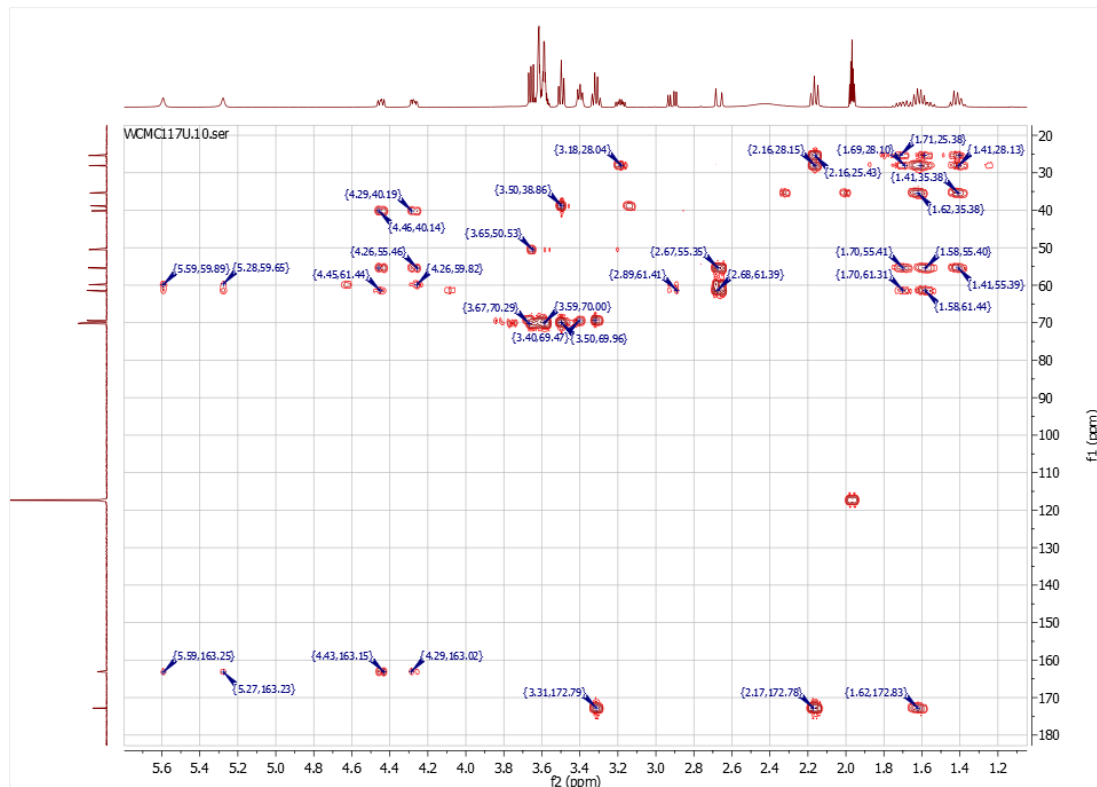

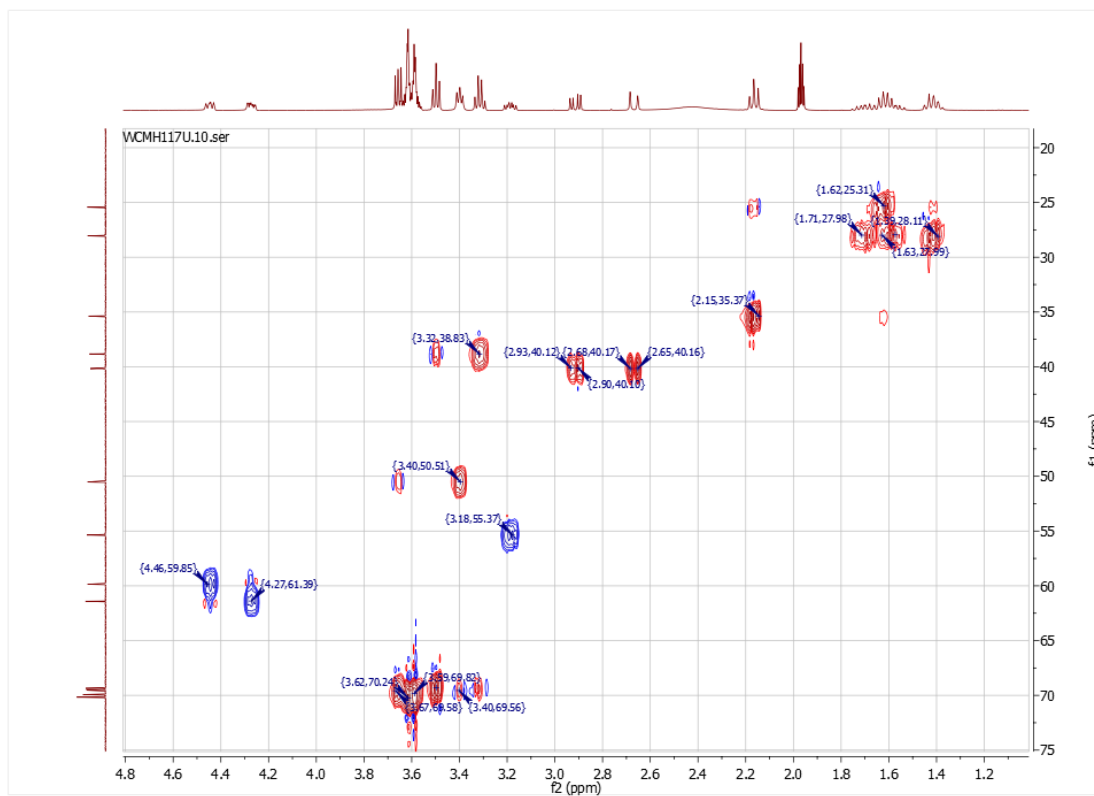

## 2.12 4'-O-biotin-linked Cytochalasin H **9**

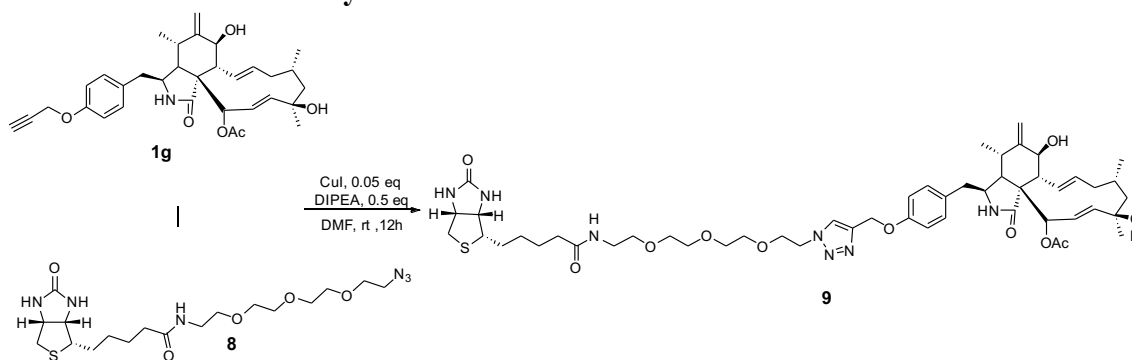

To a stirred solution of **1g** (13.0 mg, 0.024 mmol, 1.1 eq) and **8** (10.0 mg, 0.022 mmol, 1.0 eq) in DMF (2 mL) was added CuI (0.23 mg, 1.2  $\mu$ mol, 0.05 eq) and DIPEA (1.5 mg, 12  $\mu$ mol, 0.5 eq). The mixture was stirred at room temperature for 12 hours under nitrogen and the solvent was removed *in vacuo*. The residue was dissolved in EtOAc (4mL) and washed with water (3 mL x 2). The organic phase was dried over MgSO<sub>4</sub>, filtered and evaporated to dryness *in vacuo*. The residue was dissolved in MeOH and purified by LCMS to afford 14.3 mg of desired product (64.3%, 0.014 mmol) as a white solid.

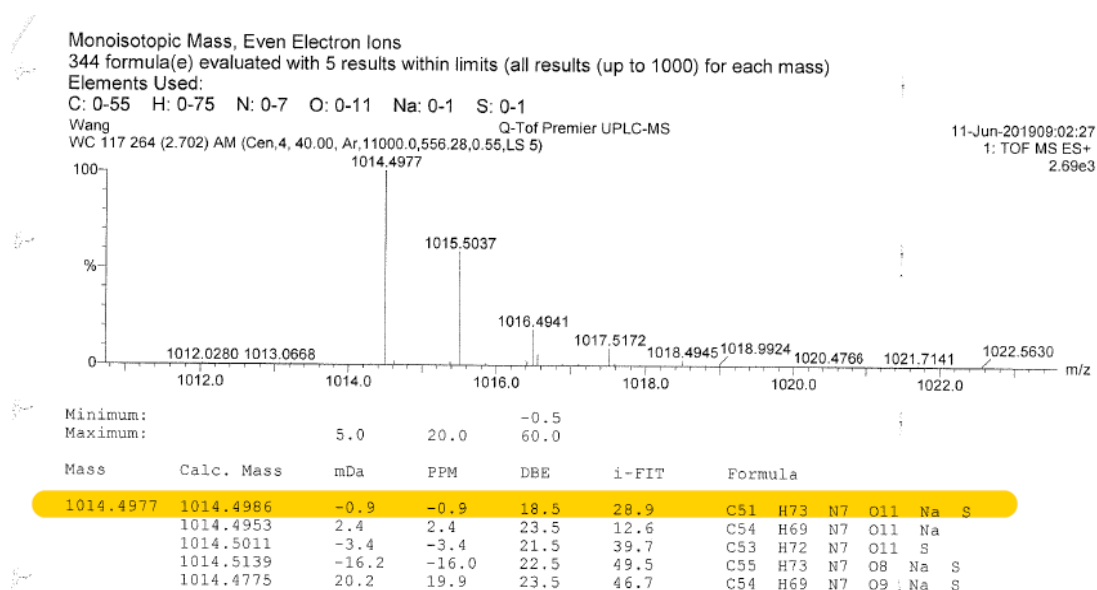

HRMS ( $m/z$ ): calculated for [C<sub>51</sub>H<sub>73</sub>N<sub>7</sub>O<sub>11</sub>S + Na]: 1014.4986, found: 1014.4977.

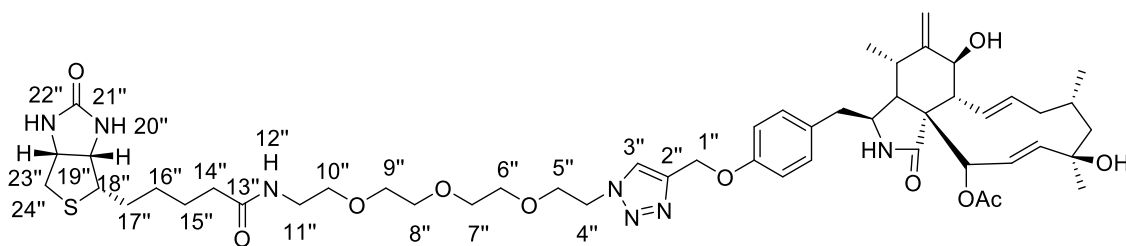

9

| Position | $\delta_H$ | M   | $J_{H-H}/\text{Hz}$ | $\delta_C$ | HSQC            | HMBC H to C      | H-H COSY  |
|----------|------------|-----|---------------------|------------|-----------------|------------------|-----------|
| 1        | -          | -   | -                   | 174.6      | -               | -                | -         |
| 3        | 3.24       | m   | -                   | 54.0       | CH              | 1', 1, 4, 5      | 4, 5, 10  |
| 4        | 2.10       | m   | -                   | 50.2       | CH              | 1, 3, 5, 6, 10   | 3, 5, 10  |
| 5        | 2.79       | m   | -                   | 33.0       | CH              | 1', 3            | 4, 11, 12 |
| 6        | -          | -   | -                   | 150.0      | -               | -                | -         |
| 7        | 3.84       | dd  | 1.3, 10.8           | 69.8       | CH              | 6, 12            | 8, 12     |
| 8        | 2.96       | m   | -                   | 47.2       | CH              | 7, 9, 13, 20, 21 | 7, 13     |
| 9        | -          | -   | -                   | 51.9       | -               | -                | -         |
| 10a      | 2.61       | m   | -                   | 44.5       | CH <sub>2</sub> | 1', 3            | 3, 4, 12  |
| 10b      | 2.80       | m   | -                   | -          | -               | -                | -         |
| 11       | 1.00       | d   | 6.7                 | 14.3       | CH <sub>3</sub> | 4, 5, 6          | 5         |
| 12a      | 5.12       | brs | -                   | 114.0      | CH <sub>2</sub> | 5, 6, 7          | 5, 7, 11  |
| 12b      | 5.37       | brs | -                   | -          | -               | -                | -         |
| 13       | 5.74       | ddd | 1.3, 9.7, 15.3      | 127.2      | CH              | 7, 8, 15         | 8, 14, 15 |
| 14       | 5.41       | ddd | 5.1, 10.4, 15.3     | 138.5      | CH              | 9, 15            | 13, 15    |
| 15a      | 1.81       | m   | -                   | 43.0       | CH <sub>2</sub> | 13, 14, 16, 17   | 13, 14,   |
| 15b      | 2.07       | m   | -                   | -          | -               | -                | -         |
| 16       | 1.82       | m   | -                   | 28.6       | CH              | 13, 14, 17       | 22        |
| 17a      | 1.61       | m   | -                   | 53.9       | CH <sub>2</sub> | 18, 19           | -         |
| 17b      | 1.90       | m   | -                   | -          | -               | -                | -         |
| 18       | -          | -   | -                   | 74.3       | -               | -                | -         |
| 19       | 5.56       | brs | -                   | 138.2      | CH              | -                | 20        |
| 20       | 5.88       | dd  | 2.6, 16.6           | 126.0      | CH              | 18, 19           | 19        |
| 21       | 5.49       | brs | -                   | 77.6       | CH              | 8, 9, 19, 20, 23 | -         |
| 22       | 1.06       | d   | 6.4                 | 26.7       | CH <sub>3</sub> | 15, 16, 17       | 16        |
| 23       | 1.38       | s   | -                   | 31.2       | CH <sub>3</sub> | 17, 18, 19       | -         |
| 1'       | -          | -   | -                   | 130.1      | -               | -                | -         |
| 2' 6'    | 7.10       | d   | 8.5                 | 130.3      | 2 x CH          | 3', 4', 5', 10   | 3', 5'    |
| 3' 5'    | 6.97       | d   | 8.5                 | 115.2      | 2 x CH          | 1', 4'           | 2', 6'    |
| 4'       | -          | -   | -                   | 157.3      | -               | -                | -         |
| 24       | -          | -   | -                   | 170.1      | -               | -                | -         |
| 25       | 2.26       | s   | -                   | 20.9       | CH <sub>3</sub> | 24               | -         |
| 1''      | 5.21       | s   | -                   | 62.1       | -               | 2'', 3'', 4'     | 3''       |
| 2''      | -          | -   | -                   | 143.9      | -               | -                | -         |
| 3''      | 7.86       | s   | -                   | 124.0      | CH              | 2''              | 1'', 4''  |
| 4''      | 4.58       | dd  | 4.5, 5.6            | 50.3       | CH <sub>2</sub> | 5''              | 3'', 5''  |
| 5''      | 3.91       | dd  | 4.5, 5.5            | 69.4       | CH <sub>2</sub> | 4'', 6''         | 4''       |
| 6''9''   | 3.58       | m   | -                   | 70.2       | CH <sub>2</sub> | 7'', 8''         | -         |
| 7'' 8''  | 3.62       | m   | -                   | 70.4       | CH <sub>2</sub> | 6'', 9''         | -         |
| 10''     | 3.54       | m   | -                   | 69.9       | CH <sub>2</sub> | 9'', 11''        | 11''      |
| 11''     | 3.42       | dd  | 5.3, 10.5           | 39.2       | CH <sub>2</sub> | 10'', 13''       | 10''      |
| 12''     | 6.56       | t   | 5.6                 | -          | -               | -                | -         |

|       |      |   |   |       |                 |                           |            |
|-------|------|---|---|-------|-----------------|---------------------------|------------|
| 13''  | -    | - | - | 173.1 | -               | -                         | -          |
| 14''  | 2.19 | m | - | 35.8  | CH <sub>2</sub> | 13'', 15'', 16''          | 15''       |
| 15''  | 1.68 | m | - | 25.7  | CH <sub>2</sub> | 13'', 14'', 16''          | 14'', 16'' |
| 16''  | 1.47 | m | - | 28.4  | CH <sub>2</sub> | 14'', 15'', 17'',<br>18'' | 15''       |
| 17''  | 1.69 | m | - | 28.2  | CH <sub>2</sub> | 18'', 19''                | -          |
| 18''  | 3.16 | m | - | 55.4  | CH              | 17''                      | -          |
| 19''  | 4.32 | m | - | 61.8  | CH              | 18'', 21'', 23'',<br>24'' | 23''       |
| 21''  | -    | - | - | 163.6 | -               | -                         | -          |
| 22''  | -    | - | - | -     | -               | -                         | -          |
| 23''  | 4.50 | m | - | 60.1  | CH              | 18'', 19'', 21'',<br>23'' | 19'', 24'' |
| 24a'' | 2.74 | m | - | 40.5  | CH <sub>2</sub> | 18'', 19''                | 23''       |
| 24b'' | 2.91 | m | - | -     | -               | -                         | -          |

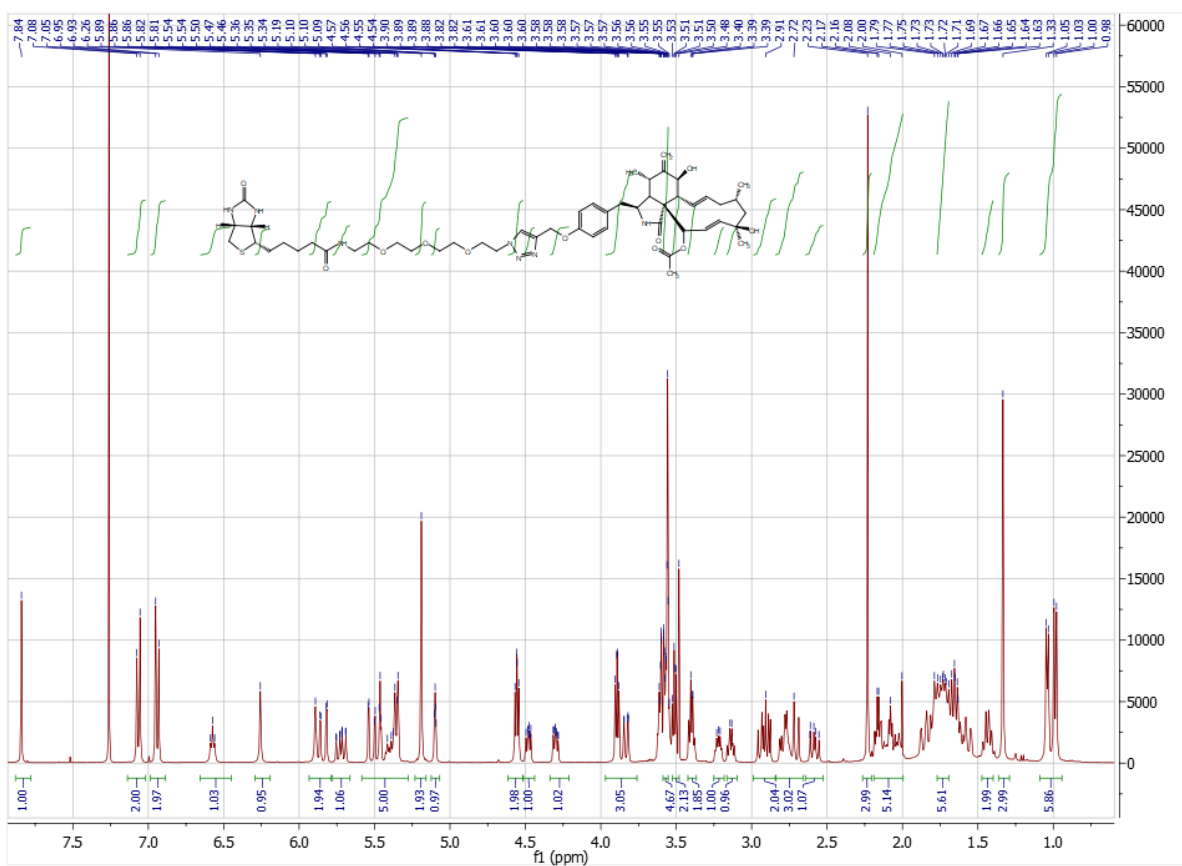

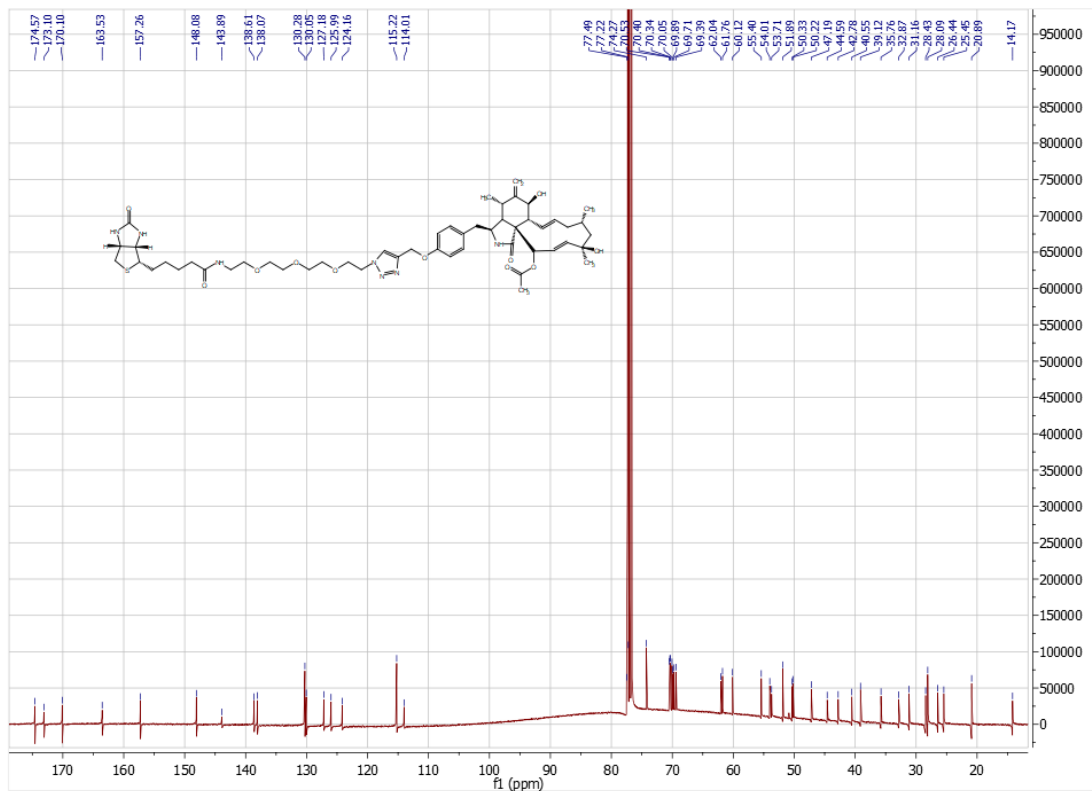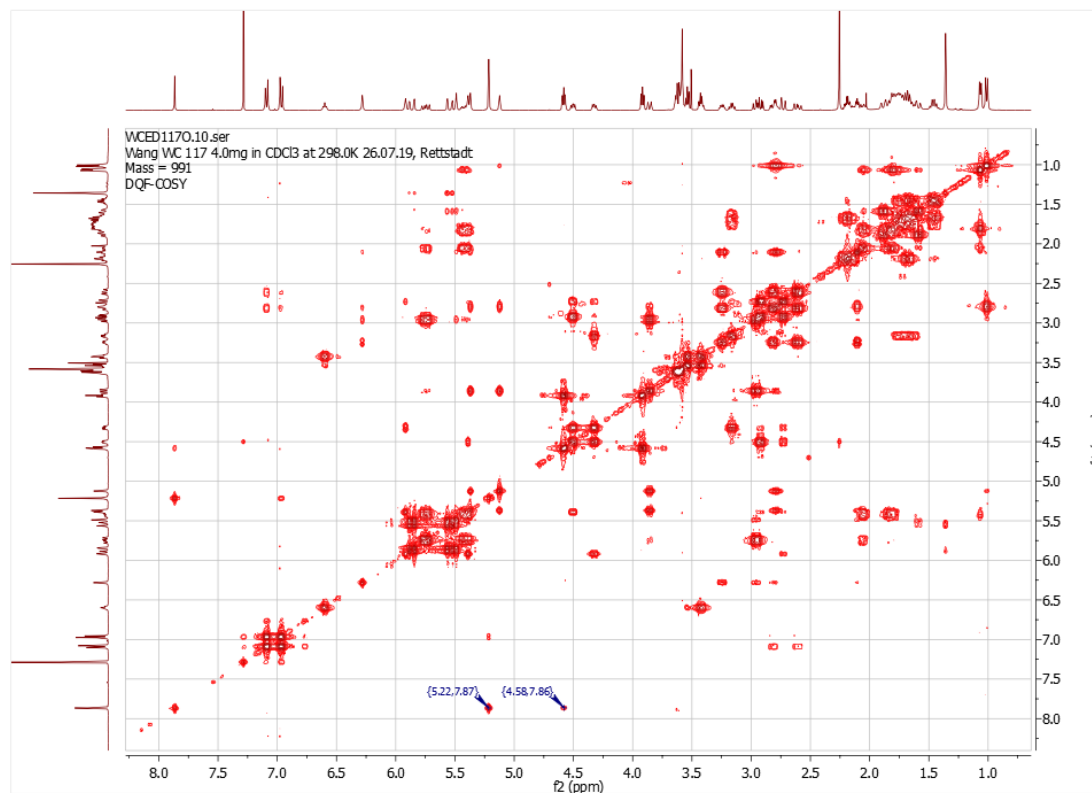



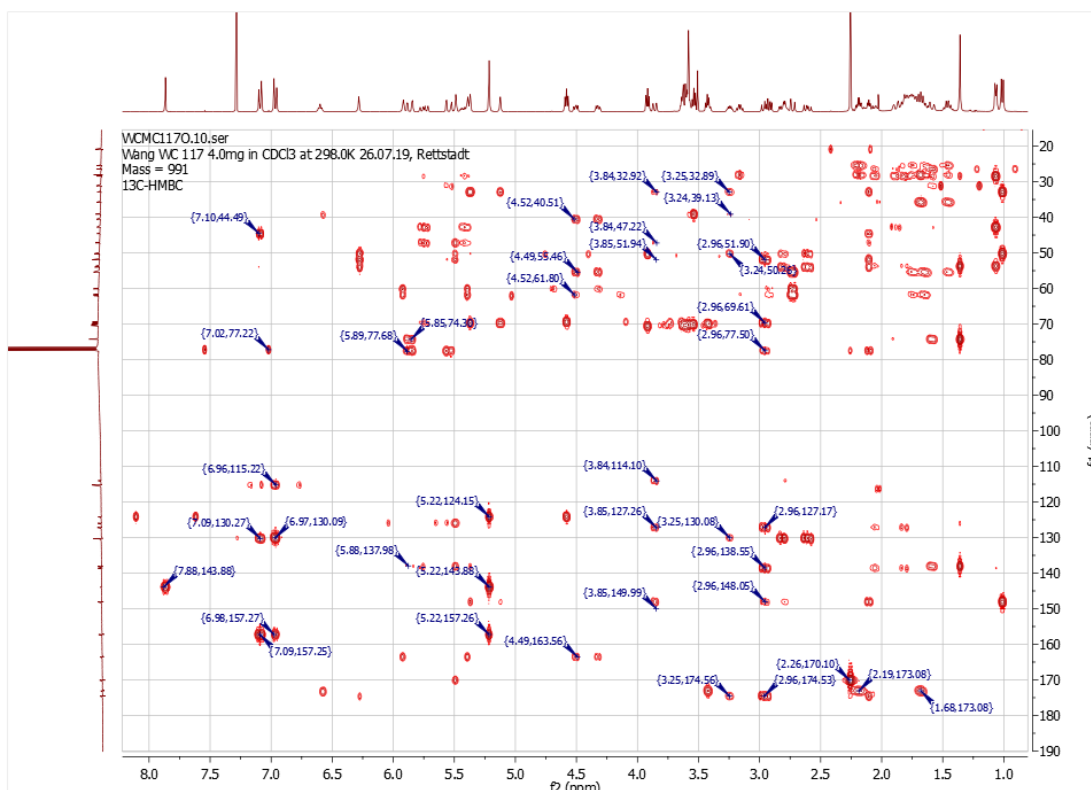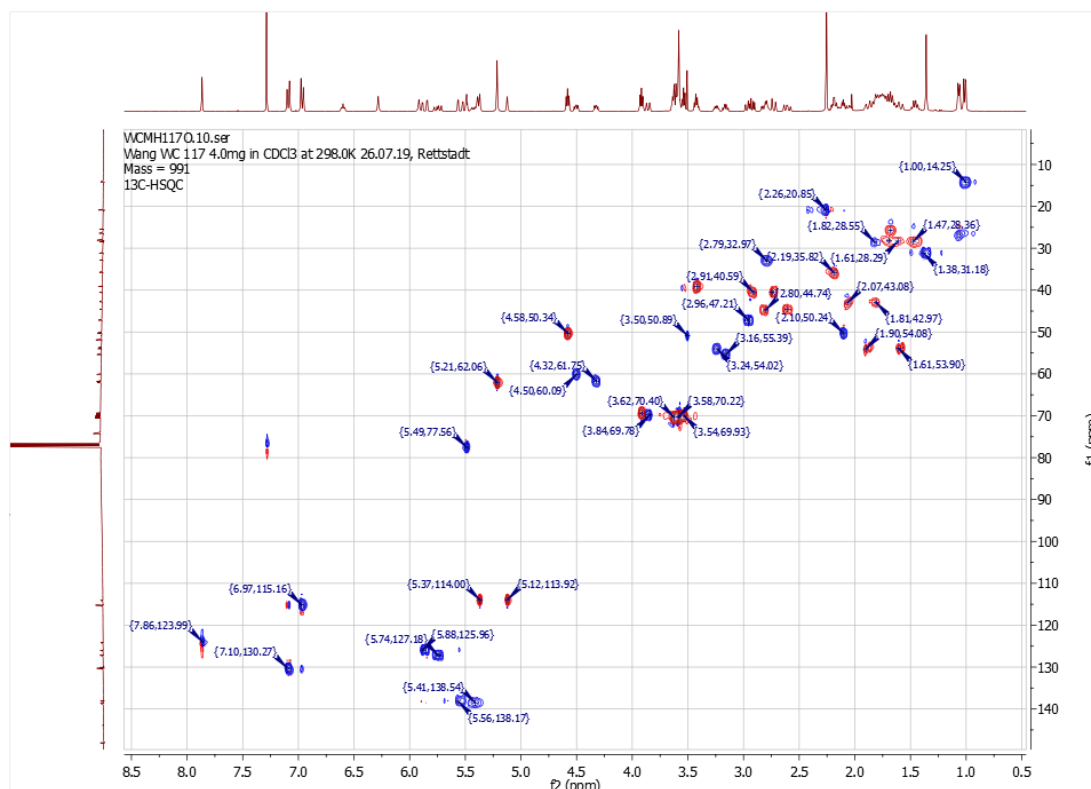

### 2.13 O-Propargyl Penicillin G 10

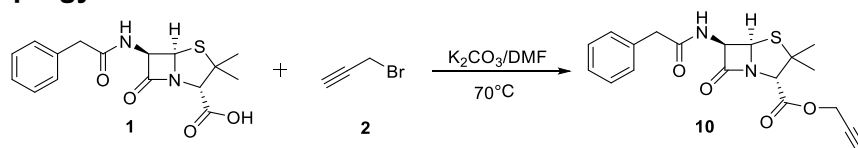

To a stirred solution of Penicillin G **1** (100.0 mg, 0.30 mmol, 1.0 eq, purchased from TCI) and **2** (0.1mL, 0.60 mmol, 2.0 eq, purchased from Acros) in dry DMF (4 mL) was added K<sub>2</sub>CO<sub>3</sub> (50.0 mg, 0.49 mmol, 1.2 eq, purchased from Acros). The mixture was stirred at 70 °C for 12 hours under nitrogen and the solvent was removed in vacuo. The residue was dissolved in EtOAc (4 mL) and washed with water (3 mL x 2). The organic phase was dried over MgSO<sub>4</sub>, filtered and evaporated to dryness in vacuo. The residue was dissolved in MeOH and purified by LCMS to afford 77.3 mg of desired product ( 69.4%, 0.196 mmol) as a white solid.

**<sup>1</sup>H NMR (500 MHz, CDCl<sub>3</sub>):**  $\delta$  (Hz) = 7.38-7.29 (m, 5H), 5.67 (dd,  $J$  = 4.2 and 9.0 Hz, 1H), 5.53 (d,  $J$  = 4.2 Hz, 1H), 4.82 (d,  $J$  = 2.5 Hz, 1H), 4.71 (d,  $J$  = 2.5 Hz, 1H), 4.42 (s, 1H), 3.65 (s, 2H), 2.53 (t,  $J$  = 2.5 Hz, 1H), 1.50 (s, 3H), 1.48 (s, 3H).

**<sup>13</sup>C NMR (125 MHz, CDCl<sub>3</sub>):**  $\delta$  = 173.5, 170.5, 166.8, 133.8, 129.4, 129.0, 127.6, 76.4, 76.2, 70.0, 67.9, 64.7, 58.7, 52.7, 43.6, 26.8.

**HRMS ( $m/z$ ):** calculated for [C<sub>19</sub>H<sub>20</sub>N<sub>2</sub>O<sub>4</sub>S + Na]: 395.1041, found: 395.1038.

## 2.14 Cytochalasin H penicillin G adduct **11**

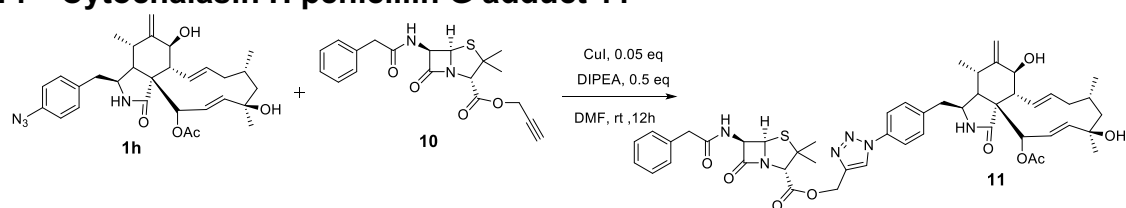

To a stirred solution of **1h** (10 mg, 0.019 mmol, 1.0 eq) and **10** (14.1 mg, 0.038 mmol, 2.0 eq) in DMF (4 mL) was added CuI (0.2 mg, 0.95  $\mu$ mol, 0.05 eq) and DIPEA (1.2 mg, 9.5  $\mu$ mol, 0.5 eq). The mixture was stirred at room temperature for 12 hours under nitrogen and the solvent was removed *in vacuo*. The residue was dissolved in EtOAc (4 mL) and washed with water (3 mL x 2). The organic phase was dried over MgSO<sub>4</sub>, filtered and evaporated to dryness *in vacuo*. The residue was dissolved in MeOH and purified by LCMS to afford 15.0 mg of desired product (88.6%, 0.015 mmol) as a white yellow solid.

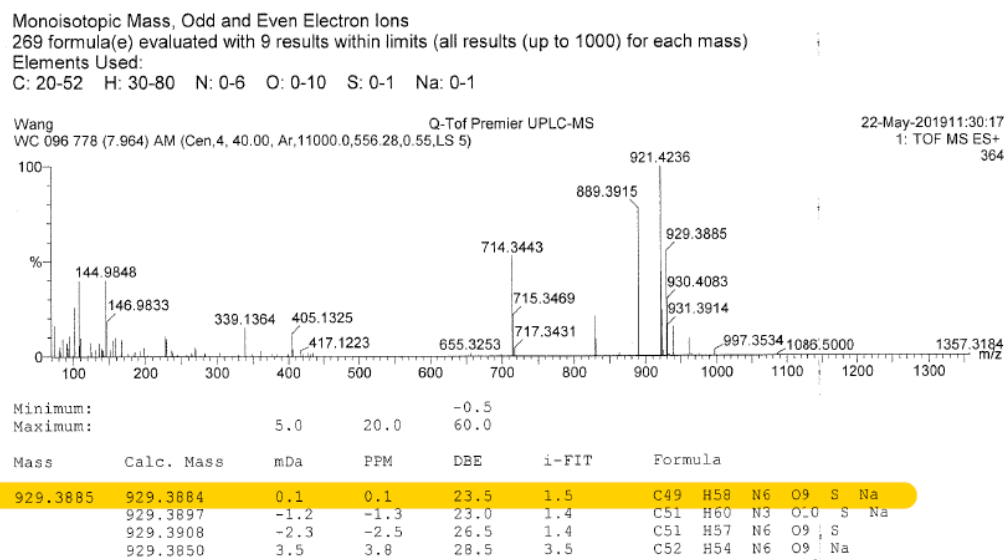

HRMS ( $m/z$ ): calculated for [C<sub>49</sub>H<sub>58</sub>N<sub>6</sub>O<sub>9</sub>S + Na]: 1007.5398, found: 1007.5402.

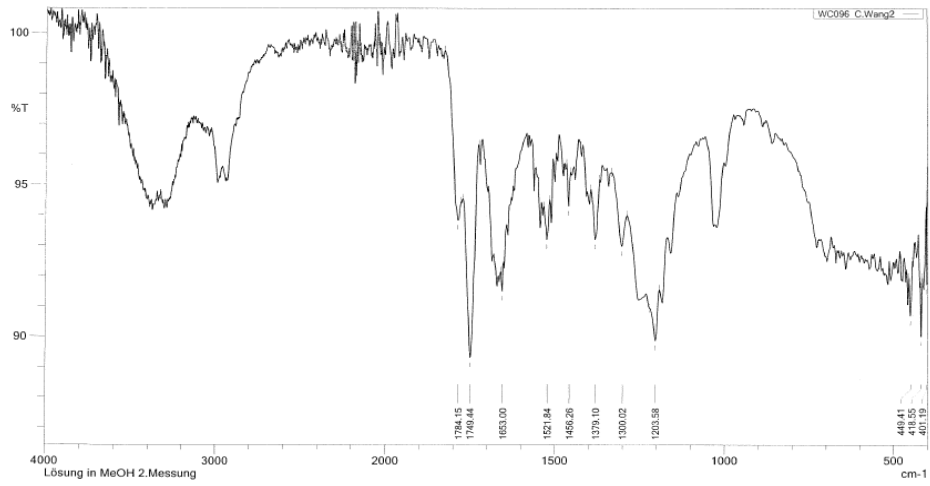

**IR (powder, cm<sup>-1</sup>):** 1784, 1749, 1653, 1521, 1456, 1379, 1300, 1203, 449, 418.

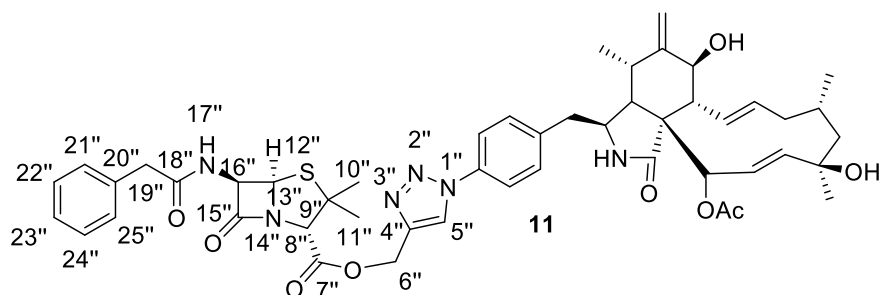

| Position | $\delta_H$ | M   | $J_{H-H}/\text{Hz}$ | $\delta_C$ | HSQC                | HMBC H to C                    | H-H COSY  |
|----------|------------|-----|---------------------|------------|---------------------|--------------------------------|-----------|
| 1        | -          | -   | -                   | 174.6      | -                   | -                              | -         |
| 3        | 3.33       | m   | -                   | 53.2       | CH                  | 1', 1, 4, 5                    | 4, 5, 10  |
| 4        | 2.17       | m   | -                   | 49.9       | CH                  | 1, 3, 5, 6, 10                 | 3, 5, 10  |
| 5        | 2.85       | m   | -                   | 32.6       | CH                  | 1', 3                          | 4, 11, 12 |
| 6        | -          | -   | -                   | 147.5      | -                   | -                              | -         |
| 7        | 3.88       | d   | 10.6                | 69.7       | CH                  | 6, 12                          | 8, 12     |
| 8        | 2.96       | m   | -                   | 47.0       | CH                  | 7, 9, 13, 20, 21               | 7, 13     |
| 9        | -          | -   | -                   | 51.9       | -                   | -                              | -         |
| 10a      | 2.74       | m   | -                   | 44.7       | CH <sub>2</sub>     | 1', 3                          | 3, 4, 12  |
| 10b      | 2.90       | m   | -                   | -          | -                   | -                              | -         |
| 11       | 0.98       | d   | 6.6                 | 13.8       | CH <sub>3</sub>     | 4, 5, 6                        | 5         |
| 12a      | 5.14       | brs | -                   | 114.3      | CH <sub>2</sub>     | 5, 6, 7                        | 5, 7, 11  |
| 12b      | 5.39       | brs | -                   | -          | -                   | -                              | -         |
| 13       | 5.75       | m   | -                   | 127.1      | CH                  | 7, 8, 15                       | 8, 14, 15 |
| 14       | 5.43       | m   | -                   | 138.9      | CH                  | 9, 15                          | 13, 15    |
| 15a      | 1.82       | m   | -                   | 42.6       | CH <sub>2</sub>     | 13, 14, 16, 17                 | 13, 14,   |
| 15b      | 2.08       | m   | -                   | -          | -                   | -                              | -         |
| 16       | 1.82       | m   | -                   | 28.2       | CH                  | 13, 14, 17                     | 22        |
| 17a      | 1.61       | m   | -                   | 53.5       | CH <sub>2</sub>     | 18, 19                         | -         |
| 17b      | 1.91       | m   | -                   | -          | -                   | -                              | -         |
| 18       | -          | -   | -                   | 74.1       | -                   | -                              | -         |
| 19       | 5.55       | brs | -                   | 138.4      | CH                  | -                              | 20        |
| 20       | 5.86       | dd  | 2.6, 16.5           | 125.8      | CH                  | 18, 19                         | 19        |
| 21       | 5.52       | brs | -                   | 77.1       | CH                  | 8, 9, 19, 20, 23               | -         |
| 22       | 1.07       | d   | 6.4                 | 26.3       | CH <sub>3</sub>     | 15, 16, 17                     | 16        |
| 23       | 1.38       | s   | -                   | 31.4       | CH <sub>3</sub>     | 17, 18, 19                     | -         |
| 1'       | -          | -   | -                   | 129.5      | -                   | -                              | -         |
| 2' 6'    | 7.34       | d   | 8.5                 | 127.8      | 2 x CH              | 3', 4', 5', 10                 | 3', 5'    |
| 3' 5'    | 7.72       | d   | 8.5                 | 121.1      | 2 x CH              | 1', 4'                         | 2', 6'    |
| 4'       | -          | -   | -                   | 135.7      | -                   | -                              | -         |
| 24       | -          | -   | -                   | 170.2      | -                   | -                              | -         |
| 25       | 2.26       | s   | -                   | 21.1       | CH <sub>3</sub>     | 24                             | -         |
| 4''      | -          | -   | -                   | 142.4      | -                   | -                              | -         |
| 5''      | 8.07       | s   | -                   | 122.2      | CH                  | 4''                            | -         |
| 6''      | 5.39       | s   | -                   | 58.1       | CH <sub>2</sub>     | 4'', 5'', 7''                  | -         |
| 7''      | -          | -   | -                   | 173.4      | -                   | -                              | -         |
| 8''      | 4.42       | s   | -                   | 70.1       | CH                  | 7'', 9'', 10'', 11'',<br>13'', | -         |
| 9''      | -          | -   | -                   | 64.7       | -                   | -                              | -         |
| 10''11'' | 1.50       | s   | -                   | 26.9       | 2 x CH <sub>3</sub> | 8'', 9''                       | -         |
| 13''     | 5.54       | d   | 4.2                 | 67.9       | CH                  | 15'', 16''                     | 16''      |
| 15''     | -          | -   | -                   | 173.5      | -                   | -                              | -         |
| 16''     | 5.69       | dd  | 4.2, 9.1            | 58.5       | CH                  | 13'', 15'', 18''               | 13''      |
| 18''     | -          | -   | -                   | 170.3      | -                   | -                              | -         |

|         |      |   |   |       |                 |                       |          |
|---------|------|---|---|-------|-----------------|-----------------------|----------|
| 19"     | 3.66 | s | - | 43.4  | CH <sub>2</sub> | 18", 20", 21",<br>25" | -        |
| 20"     | -    | - | - | 133.8 | -               | -                     | -        |
| 21" 25" | 7.30 | m | - | 129.6 | 2 x CH          | 22" 24"               | 22" 24"  |
| 22" 24" | 7.39 | m | - | 129.2 | 2 x CH          | 21" 25"               | 21" 25"  |
| 23"     | 7.28 | m | - | 127.6 | CH              | 21", 22", 24",<br>25" | 22", 24" |

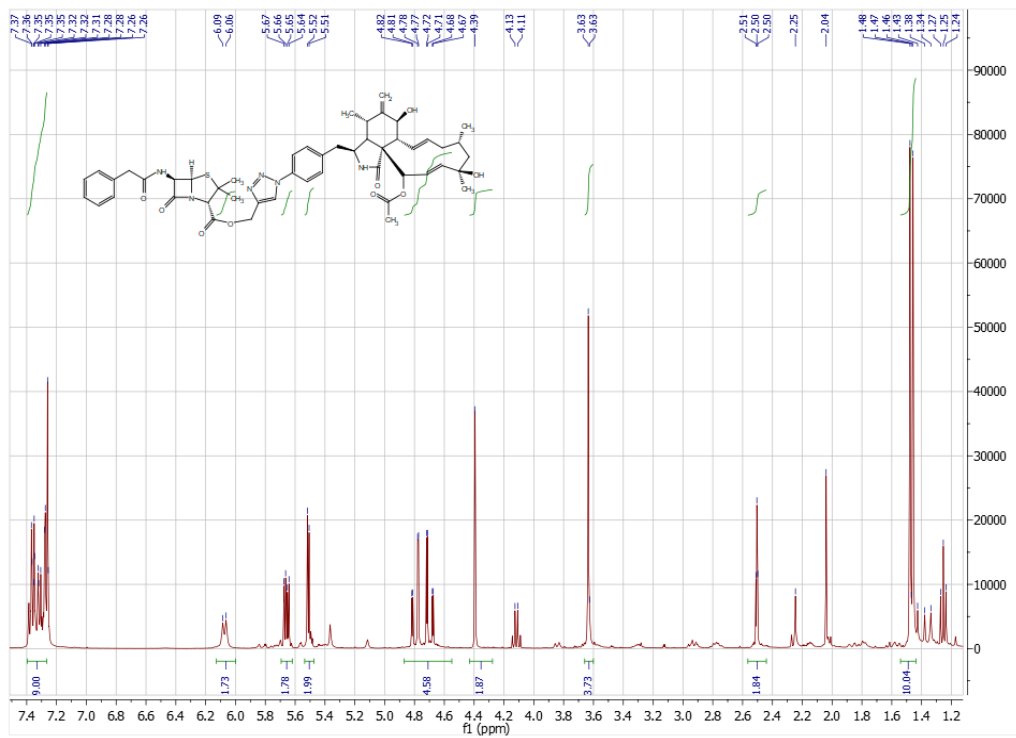

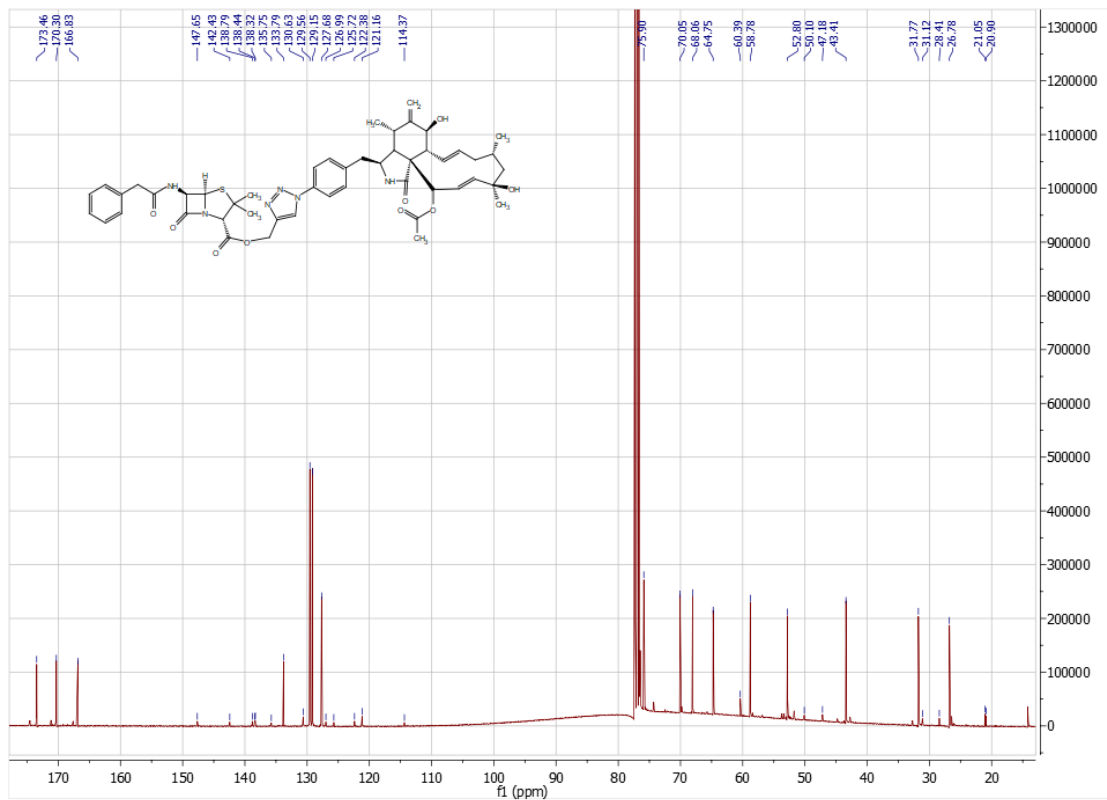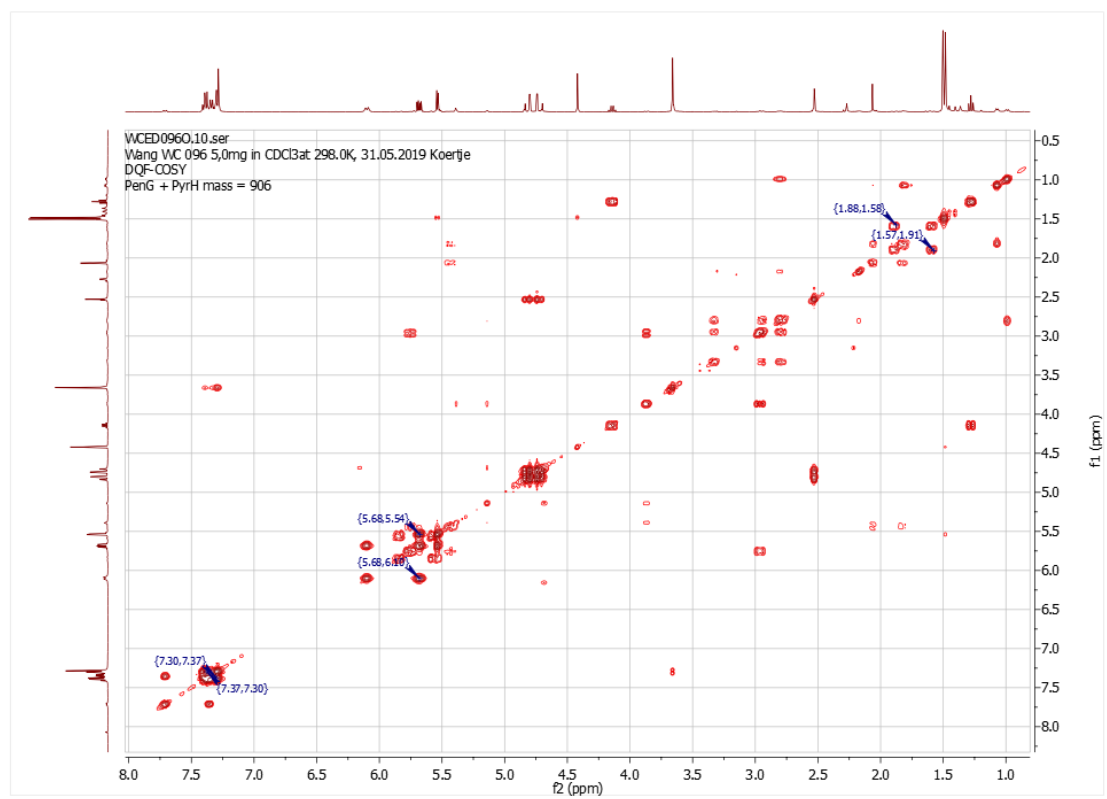

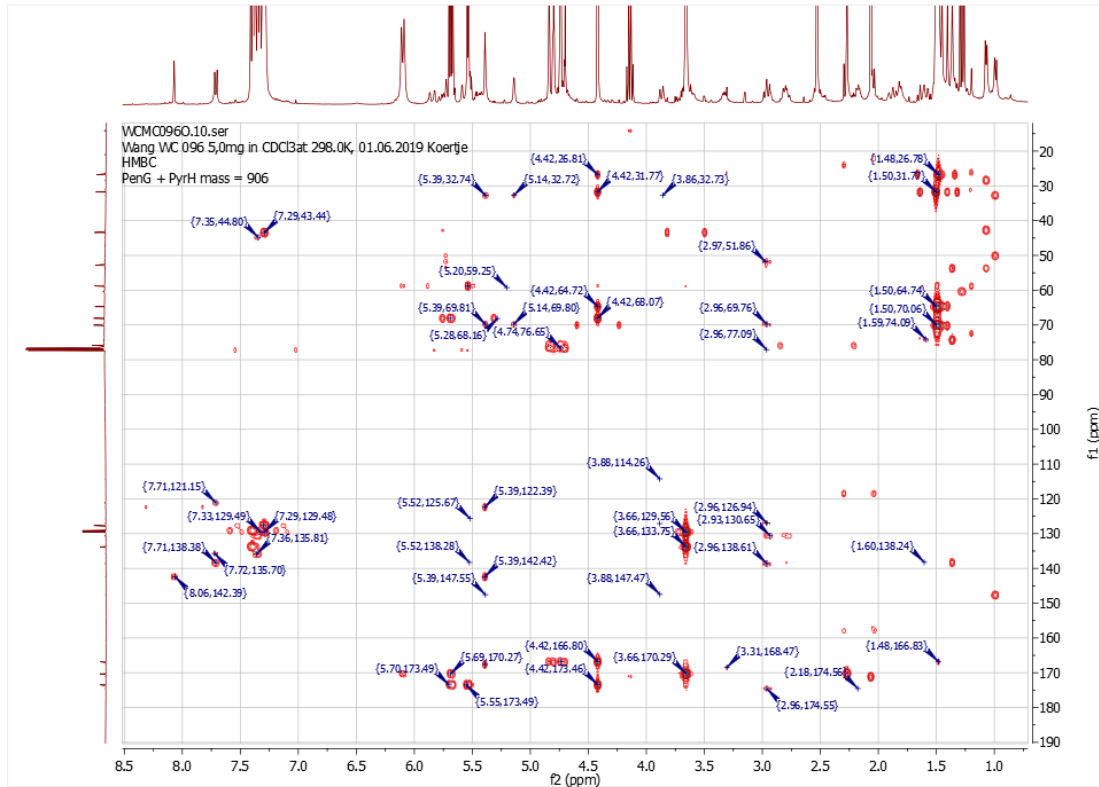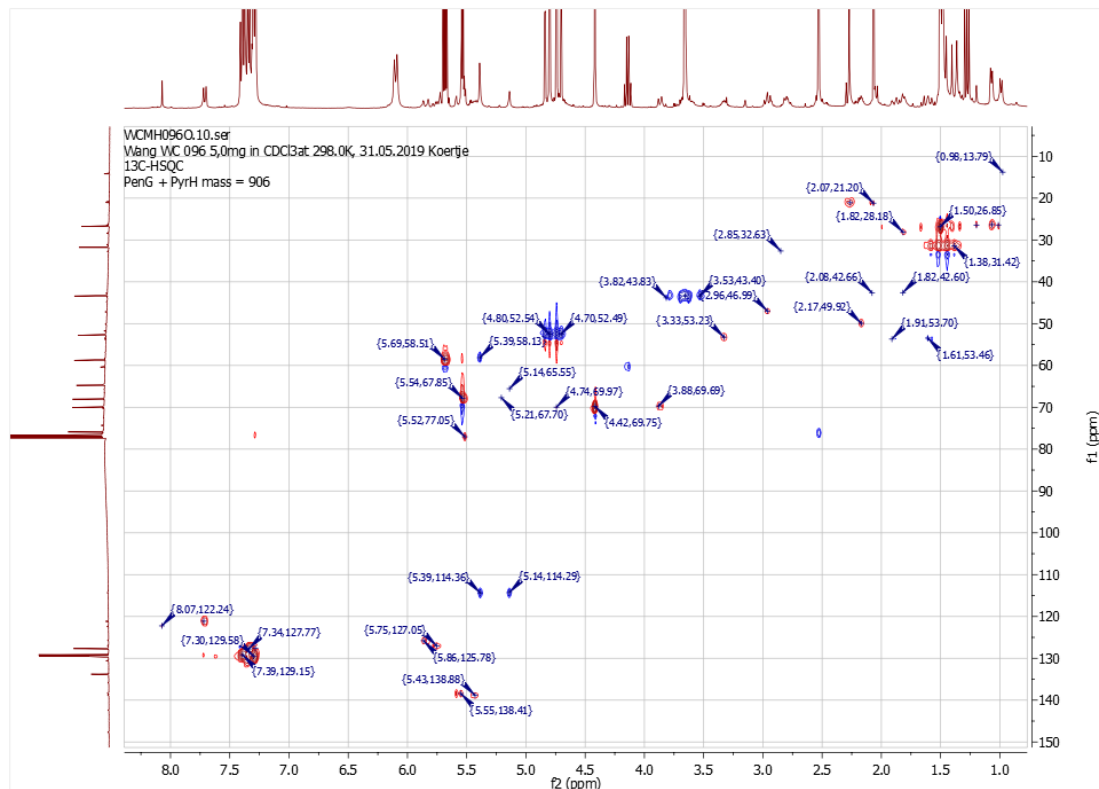



## 2.15 4'-Perylene linked Cytochalasin H 13

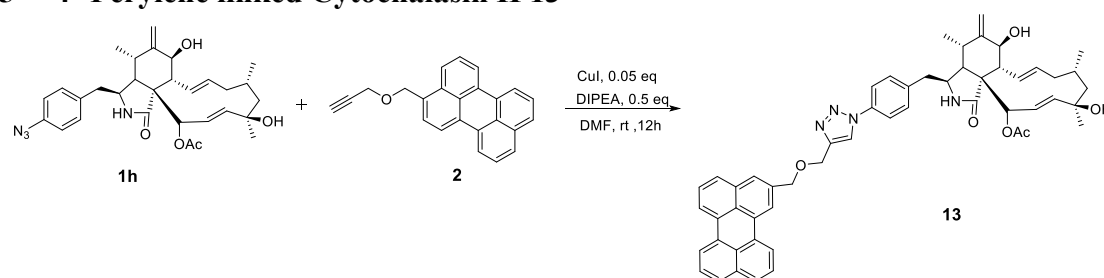

To a stirred solution of **1h** (10 mg, 0.019 mmol, 1.0 eq) and perylene-linked acetylene **2** (12.2 mg, 0.038 mmol, 2.0 eq) in DMF (2 mL) was added CuI (0.2 mg, 0.95  $\mu$ mol, 0.05 eq) and DIPEA (1.2 mg, 9.5  $\mu$ mol, 0.5 eq). The mixture was stirred at room temperature for 12 hours under nitrogen and the solvent was removed *in vacuo*. The residue was dissolved in EtOAc (2 mL) and washed with water (2 mL x 2). The organic phase was dried over MgSO<sub>4</sub>, filtered and evaporated to dryness *in vacuo*. The residue was dissolved in MeOH and purified by LCMS to afford 8.0 mg of desired product (72.5%, 0.009 mmol) as a yellow solid.

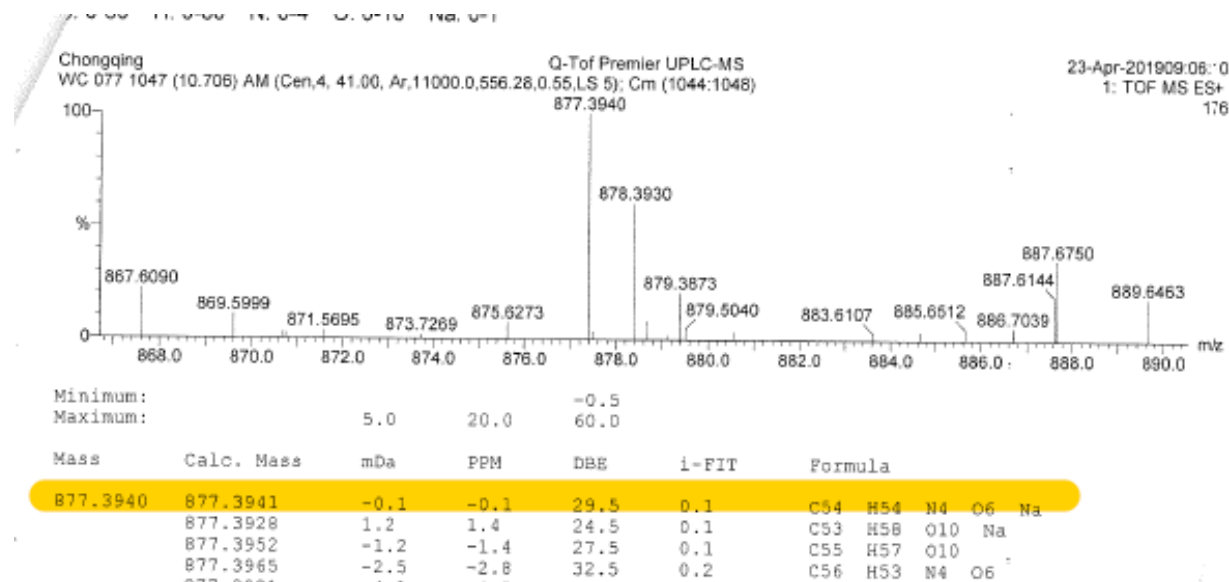

**HRMS (m/z):** calculated for [C<sub>54</sub>H<sub>54</sub>N<sub>4</sub>O<sub>6</sub> + Na]: 877.3941, found: 877.3940.

**IR (powder, cm<sup>-1</sup>):** 2922, 1735, 1693, 1519, 1369, 1228, 1043, 1014, 962, 812, 767, 542.

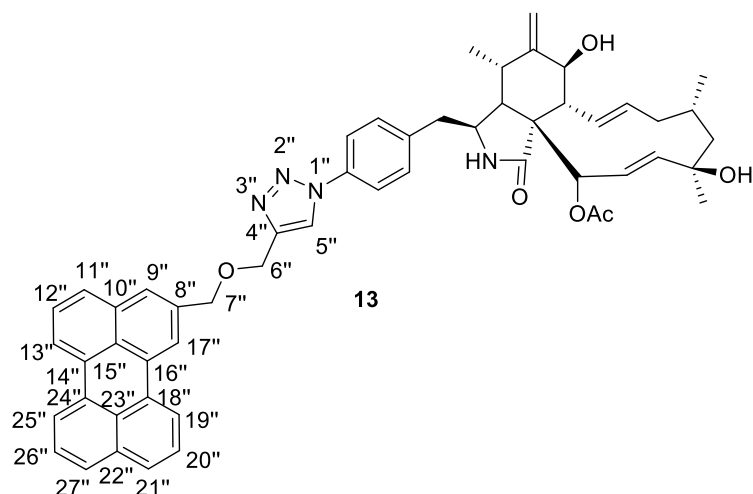

| Position | $\delta_H$ | M   | $J_{H-H}/\text{Hz}$ | $\delta_C$ | HSQC            | HMBC H to C      | H-H COSY  |
|----------|------------|-----|---------------------|------------|-----------------|------------------|-----------|
| 1        | -          | -   | -                   | 174.3      | -               | -                | -         |
| 3        | 3.29       | m   | -                   | 52.9       | CH              | 1', 1, 4, 5      | 4, 5, 10  |
| 4        | 2.16       | dd  | 3.7, 5.0            | 49.9       | CH              | 1, 3, 5, 6, 10   | 3, 5, 10  |
| 5        | 2.81       | m   | -                   | 32.4       | CH              | 1', 3            | 4, 11, 12 |
| 6        | -          | -   | -                   | 147.7      | -               | -                | -         |
| 7        | 3.88       | dd  | 1.3, 10.8           | 69.4       | CH              | 6, 12            | 8, 12     |
| 8        | 2.98       | m   | -                   | 46.8       | CH              | 7, 9, 13, 20, 21 | 7, 13     |
| 9        | -          | -   | -                   | 51.6       | -               | -                | -         |
| 10a      | 2.74       | m   | -                   | 44.7       | CH <sub>2</sub> | 1', 3            | 3, 4, 12  |
| 10b      | 2.90       | m   | -                   | -          | -               | -                | -         |
| 11       | 0.99       | d   | 6.6                 | 13.7       | CH <sub>3</sub> | 4, 5, 6          | 5         |
| 12a      | 5.14       | brs | -                   | 113.8      | CH <sub>2</sub> | 5, 6, 7          | 5, 7, 11  |
| 12b      | 5.39       | brs | -                   | -          | -               | -                | -         |
| 13       | 5.76       | ddd | 1.4, 9.7, 15.4      | 126.7      | CH              | 7, 8, 15         | 8, 14, 15 |
| 14       | 5.42       | ddd | 4.8, 10.1, 15.4     | 138.4      | CH              | 9, 15            | 13, 15    |
| 15a      | 1.83       | m   | -                   | 42.3       | CH <sub>2</sub> | 13, 14, 16, 17   | 13, 14,   |
| 15b      | 2.06       | m   | -                   | -          | -               | -                | -         |
| 16       | 1.82       | m   | -                   | 28.1       | CH              | 13, 14, 17       | 22        |
| 17a      | 1.61       | m   | -                   | 53.3       | CH <sub>2</sub> | 18, 19           | -         |
| 17b      | 1.90       | m   | -                   | -          | -               | -                | -         |
| 18       | -          | -   | -                   | 74.4       | -               | -                | -         |
| 19       | 5.56       | brs | -                   | 137.9      | CH              | -                | 20        |
| 20       | 5.85       | dd  | 2.2, 17.0           | 125.4      | CH              | 18, 19           | 19        |
| 21       | 5.58       | brs | -                   | 76.8       | CH              | 8, 9, 19, 20, 23 | -         |
| 22       | 1.07       | d   | 6.4                 | 26.1       | CH <sub>3</sub> | 15, 16, 17       | 16        |
| 23       | 1.38       | s   | -                   | 30.8       | CH <sub>3</sub> | 17, 18, 19       | -         |
| 1'       | -          | -   | -                   | 138.0      | -               | -                | -         |
| 2' 6'    | 7.27       | d   | 8.5                 | 130.3      | 2 x CH          | 3', 4', 5', 10   | 3', 5'    |
| 3' 5'    | 7.65       | d   | 8.5                 | 120.6      | 2 x CH          | 1', 4'           | 2', 6'    |
| 4'       | -          | -   | -                   | 136.0      | -               | -                | -         |
| 24       | -          | -   | -                   | 170.2      | -               | -                | -         |
| 25       | 2.28       | s   | -                   | 20.6       | CH <sub>3</sub> | 24               | -         |
| 4''      | -          | -   | -                   | 146.1      | -               | -                | -         |
| 5''      | 7.87       | s   | -                   | 120.4      | CH              | 4''              | -         |
| 6''      | 4.90       | s   | -                   | 63.4       | CH <sub>2</sub> | 4'', 5'', 7''    | -         |
| 7''      | 5.09       | s   | -                   | 71.1       | CH <sub>2</sub> | 6'', 8'', 17''   | -         |

|           |      |    |          |       |        |                            |          |
|-----------|------|----|----------|-------|--------|----------------------------|----------|
| 8"        | -    | -  | -        | 133.0 | -      | -                          | -        |
| 9"        | 8.18 | s  | -        | 119.2 | CH     | 8", 10"                    | -        |
| 10"       | -    | -  | -        | 129.1 | -      | -                          | -        |
| 11"       | 8.00 | dd | 0.9, 8.3 | 123.2 | CH     | 10", 13", 15"              | 12", 13" |
| 12"20"26" | 7.56 | m  | -        | 127.3 | 3 x CH | 13", 19", 25",<br>16", 22" | 11", 13" |
| 13"19"25" | 8.23 | dd | 1.0, 7.6 | 120.0 | 3 x CH | 14", 15", 23"              | 11", 12" |
| 14"       | -    | -  | -        | 128.3 | -      | -                          | -        |
| 15"       | -    | -  | -        | 132.8 | -      | -                          | -        |
| 16"       | -    | -  | -        | 131.1 | -      | -                          | -        |
| 17"       | 7.72 | d  | 8.2      | 127.6 | CH     | 8", 9", 16", 18"           | 21"      |
| 18"       | -    | -  | -        | 128.5 | -      | -                          | -        |
| 21"27"    | 7.52 | dd | 1.6, 7.8 | 126.2 | 2 x CH | 19", 22"                   | 17"      |
| 22"       | -    | -  | -        | 134.7 | -      | -                          | -        |
| 23"       | -    | -  | -        | 135.1 | -      | -                          | -        |
| 24"       | -    | -  | -        | 132.0 | -      | -                          | -        |

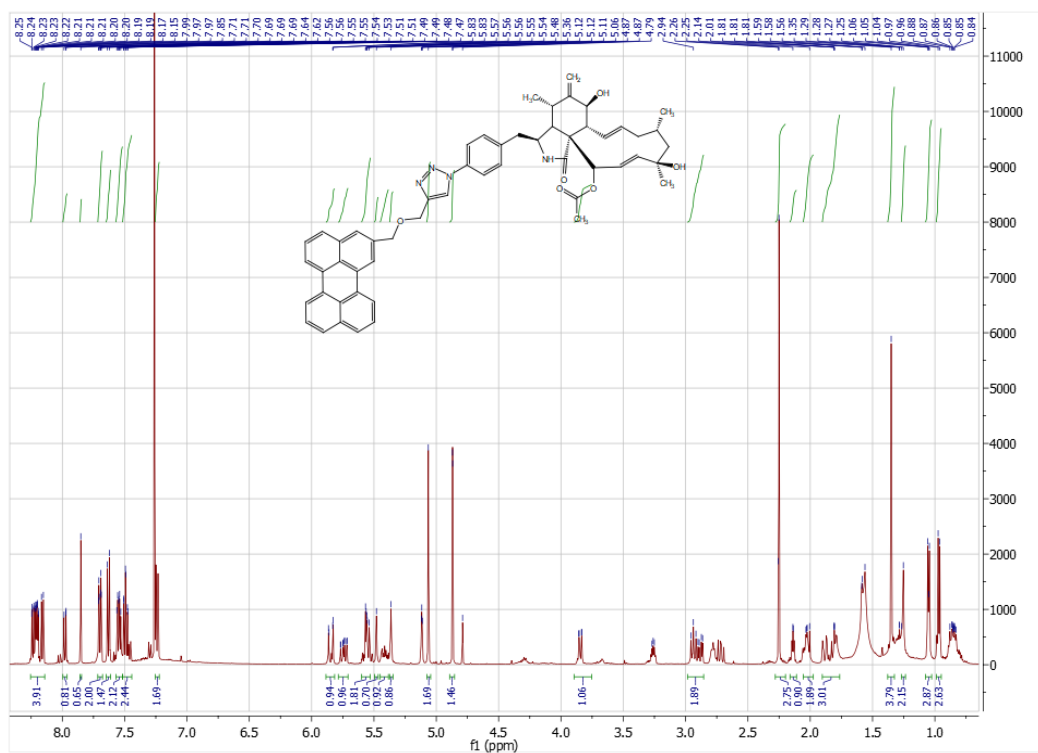

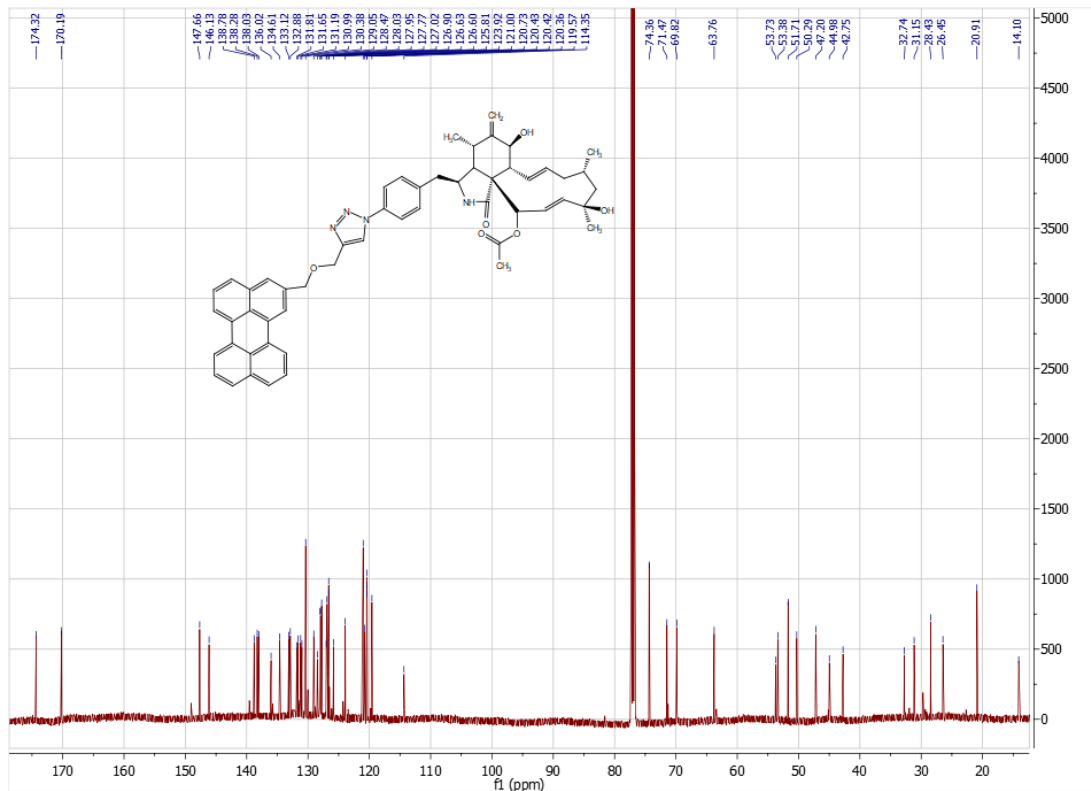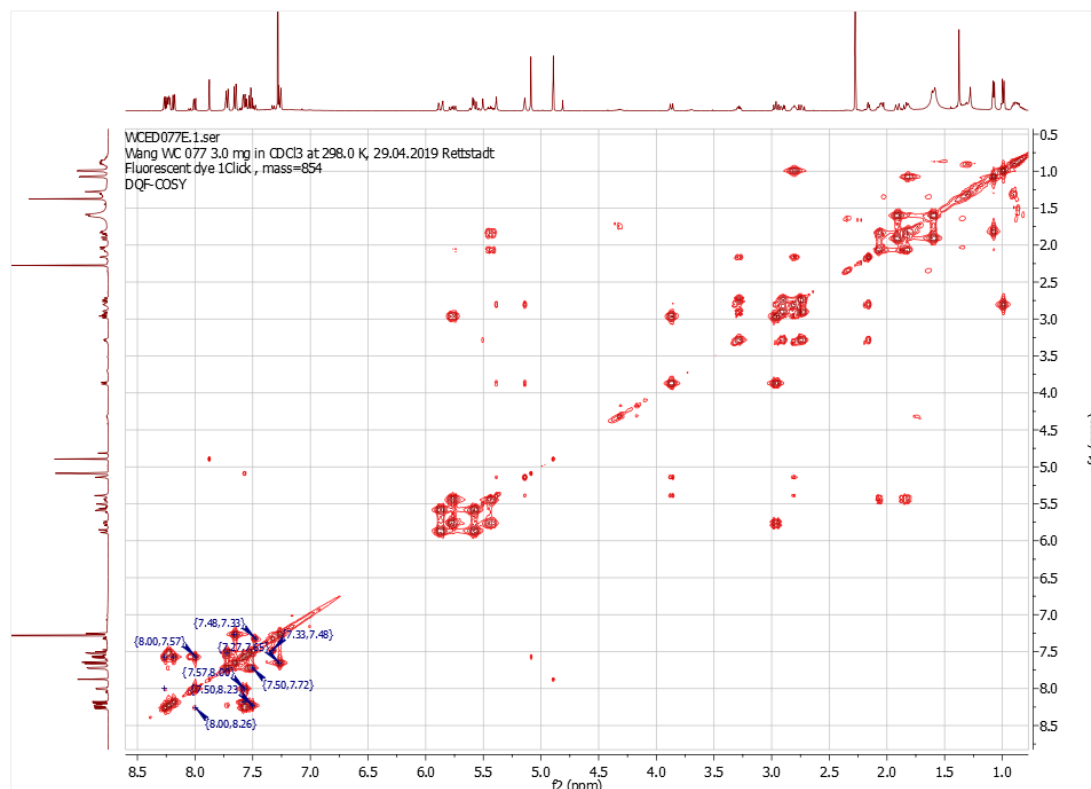

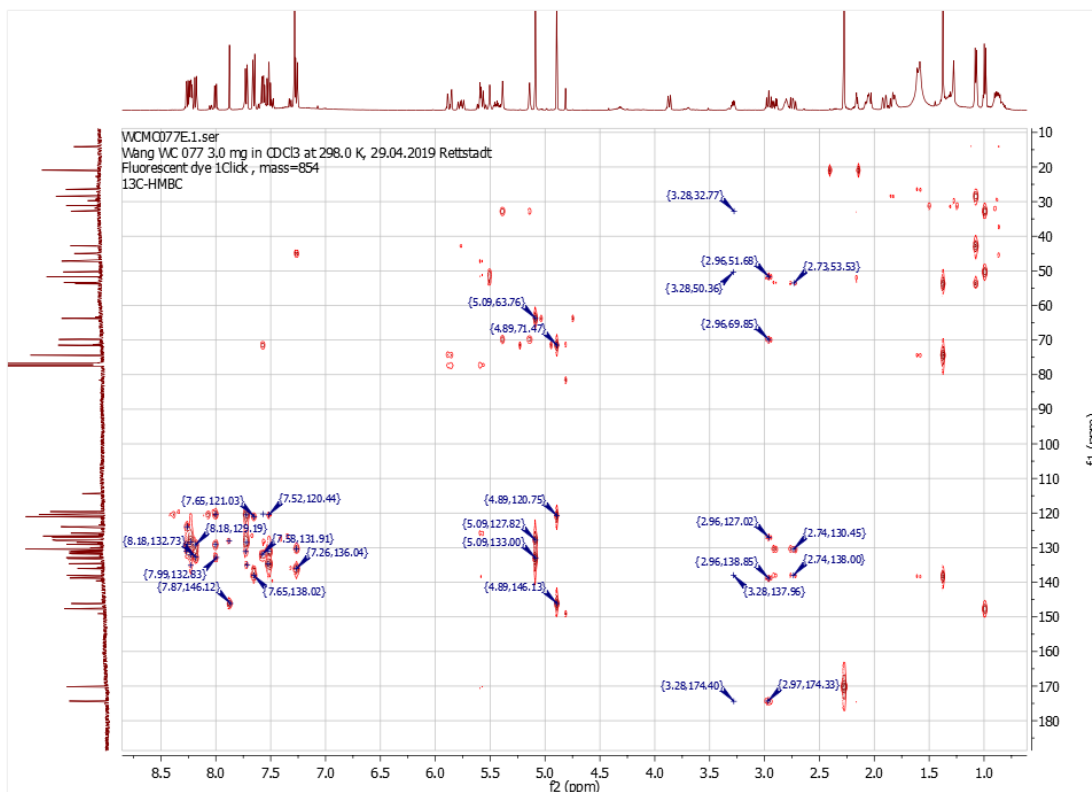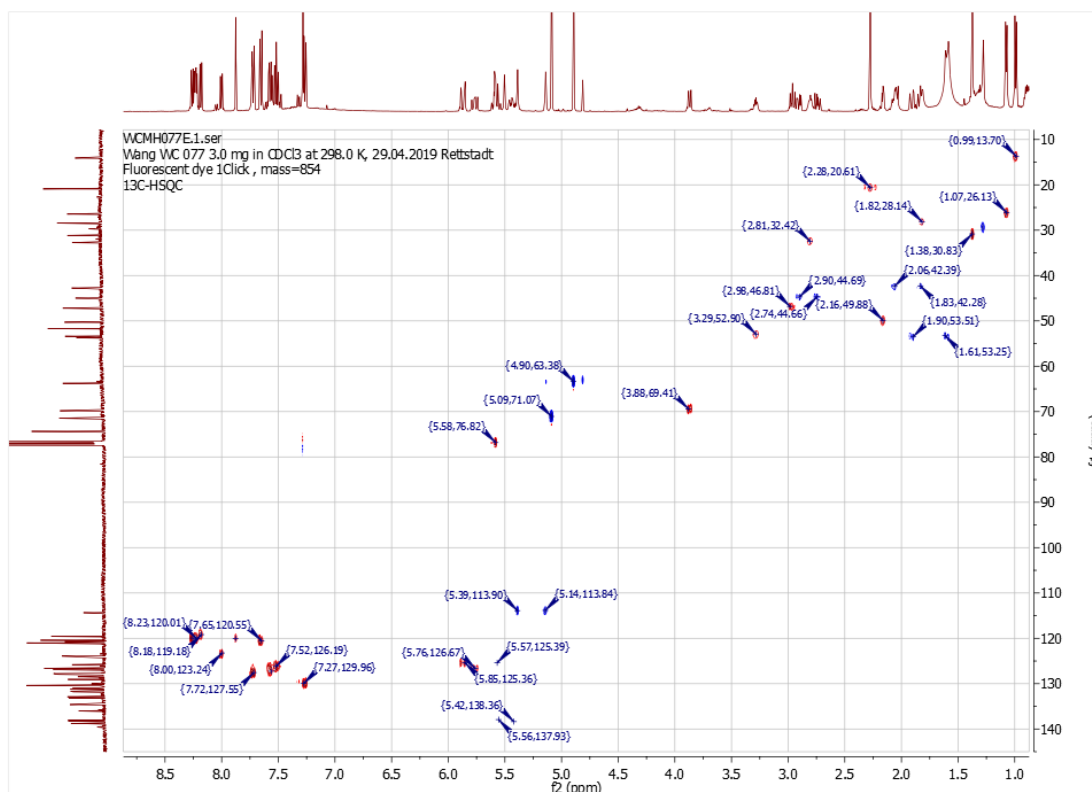

## 2.16 4-Coumarin dye-linked Cytoclasin H 15

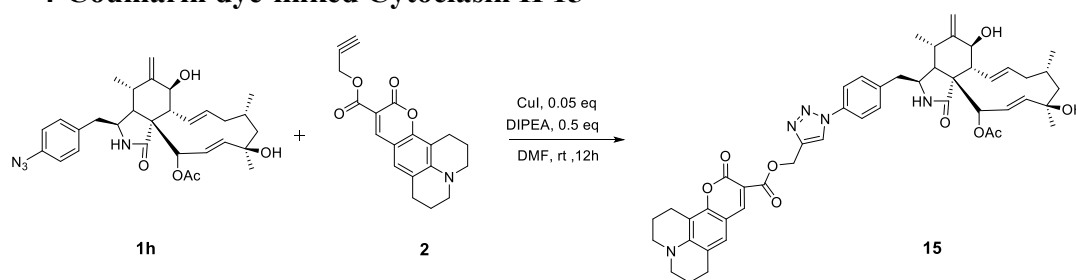

To a stirred solution of **1h** (5 mg, 0.01 mmol, 1.0 eq) and acetylene-linked coumarin **2** (3.0 mg, 0.01 mmol, 1.0 eq) in DMF (2 mL) was added CuI (0.1 mg, 0.5  $\mu$ mol, 0.05 eq) and DIPEA (0.6 mg, 4.8  $\mu$ mol, 0.5 eq). The mixture was stirred at room temperature for 12 hours under nitrogen and the solvent was removed *in vacuo*. The residue was dissolved in EtOAc (2 mL) and washed with water (2 mL x 2). The organic phase was dried over MgSO<sub>4</sub>, filtered and evaporated to dryness *in vacuo*. The residue was dissolved in MeOH and purified by LCMS to afford 6.3 mg of desired product (78.2%, 0.007 mmol) as a deep yellow solid.

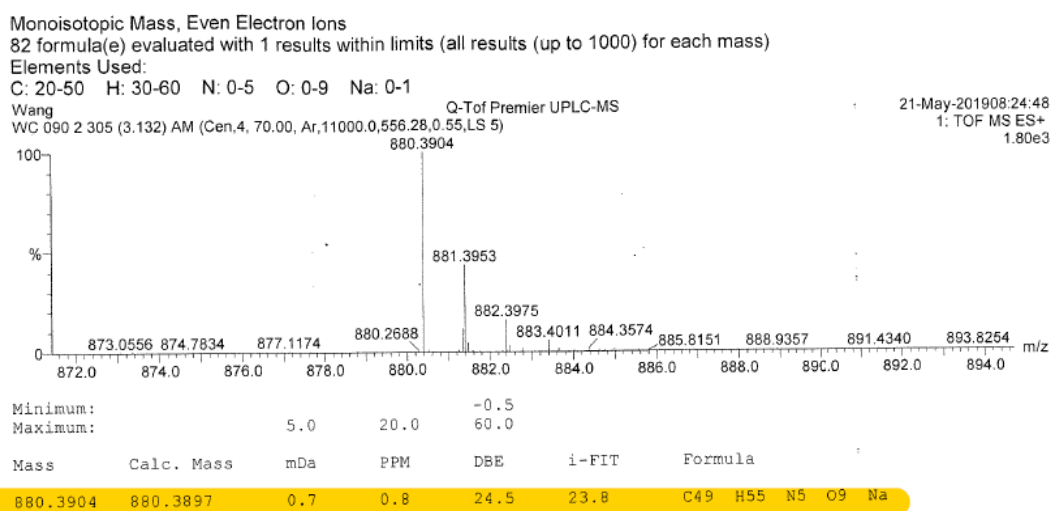

**HRMS ( $m/z$ ):** calculated for [C<sub>49</sub>H<sub>55</sub>N<sub>5</sub>O<sub>9</sub> + Na]: 880.3897, found: 880.3904.

**IR (powder, cm<sup>-1</sup>):** 3419, 2924, 1735, 1685, 1618, 1585, 1560, 1517, 1442, 1369, 1309, 1238, 1197, 1172, 1111, 1045, 962, 792, 439.

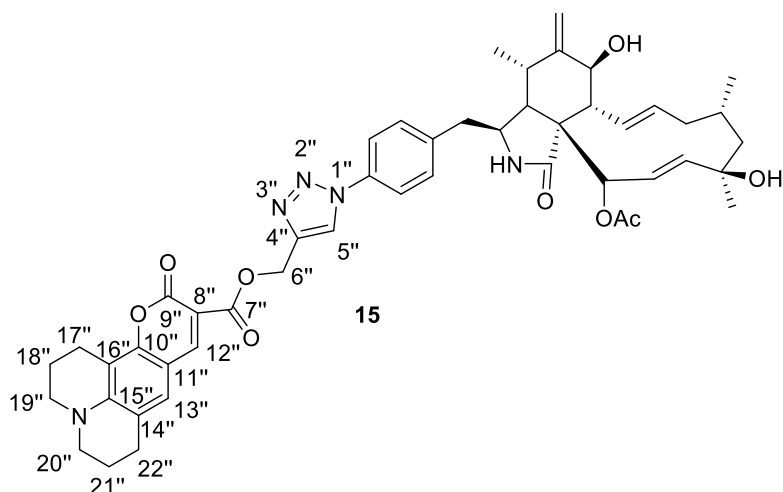

| Position | $\delta_H$ | M   | $J_{H-H}/\text{Hz}$ | $\delta_C$ | HSQC            | HMBC H to C      | H-H COSY  |
|----------|------------|-----|---------------------|------------|-----------------|------------------|-----------|
| 1        | -          | -   | -                   | 174.3      | -               | -                | -         |
| 3        | 3.31       | m   | -                   | 53.3       | CH              | 1', 1, 4, 5      | 4, 5, 10  |
| 4        | 2.17       | dd  | 3.7, 5.0            | 50.1       | CH              | 1, 3, 5, 6, 10   | 3, 5, 10  |
| 5        | 2.79       | m   | -                   | 32.7       | CH              | 1', 3            | 4, 11, 12 |
| 6        | -          | -   | -                   | 148.9      | -               | -                | -         |
| 7        | 3.86       | dd  | 1.3, 10.8           | 69.8       | CH              | 6, 12            | 8, 12     |
| 8        | 2.96       | m   | -                   | 47.2       | CH              | 7, 9, 13, 20, 21 | 7, 13     |
| 9        | -          | -   | -                   | 51.6       | -               | -                | -         |
| 10a      | 2.77       | m   | -                   | 45.0       | CH <sub>2</sub> | 1', 3            | 3, 4, 12  |
| 10b      | 2.90       | m   | -                   | -          | -               | -                | -         |
| 11       | 0.94       | d   | 6.6                 | 14.0       | CH <sub>3</sub> | 4, 5, 6          | 5         |
| 12a      | 5.13       | brs | -                   | 114.2      | CH <sub>2</sub> | 5, 6, 7          | 5, 7, 11  |
| 12b      | 5.37       | brs | -                   | -          | -               | -                | -         |
| 13       | 5.76       | ddd | 1.4, 9.7, 15.4      | 127.1      | CH              | 7, 8, 15         | 8, 14, 15 |
| 14       | 5.41       | ddd | 4.8, 10.1, 15.4     | 138.6      | CH              | 9, 15            | 13, 15    |
| 15a      | 1.82       | m   | -                   | 42.7       | CH <sub>2</sub> | 13, 14, 16, 17   | 13, 14,   |
| 15b      | 2.05       | m   | -                   | -          | -               | -                | -         |
| 16       | 1.81       | m   | -                   | 28.4       | CH              | 13, 14, 17       | 22        |
| 17a      | 1.58       | m   | -                   | 53.8       | CH <sub>2</sub> | 18, 19           | -         |
| 17b      | 1.88       | m   | -                   | -          | -               | -                | -         |
| 18       | -          | -   | -                   | 74.4       | -               | -                | -         |
| 19       | 5.59       | brs | -                   | 138.2      | CH              | -                | 20        |
| 20       | 5.85       | dd  | 2.2, 17.0           | 125.8      | CH              | 18, 19           | 19        |
| 21       | 5.56       | brs | -                   | 77.2       | CH              | 8, 9, 19, 20, 23 | -         |
| 22       | 1.07       | d   | 6.4                 | 26.5       | CH <sub>3</sub> | 15, 16, 17       | 16        |
| 23       | 1.37       | s   | -                   | 31.2       | CH <sub>3</sub> | 17, 18, 19       | -         |
| 1'       | -          | -   | -                   | 138.0      | -               | -                | -         |
| 2' 6'    | 7.33       | d   | 8.5                 | 130.3      | 2 x CH          | 3', 4', 5', 10   | 3', 5'    |
| 3' 5'    | 7.73       | d   | 8.5                 | 121.0      | 2 x CH          | 1', 4'           | 2', 6'    |
| 4'       | -          | -   | -                   | 136.0      | -               | -                | -         |
| 24       | -          | -   | -                   | 170.2      | -               | -                | -         |
| 25       | 2.27       | s   | -                   | 20.9       | CH <sub>3</sub> | 24               | -         |
| 4''      | -          | -   | -                   | 144.2      | -               | -                | -         |
| 5''      | 8.27       | s   | -                   | 122.1      | CH              | 4''              | -         |
| 6''      | 5.53       | s   | -                   | 58.0       | CH <sub>2</sub> | 4'', 5'', 7''    | -         |
| 7''      | -          | -   | -                   | 164.0      | -               | -                | -         |

|          |      |   |     |       |                     |                                  |                     |
|----------|------|---|-----|-------|---------------------|----------------------------------|---------------------|
| 8''      | -    | - | -   | 106.1 | -                   | -                                | -                   |
| 9''      | -    | - | -   | 158.7 | -                   | -                                | -                   |
| 10''     | -    | - | -   | 153.6 | -                   | -                                | -                   |
| 11''     | -    | - | -   | 107.3 | -                   | -                                | -                   |
| 12''     | 8.38 | m | -   | 149.6 | CH                  | 7'', 8'', 9'', 10'',<br>13'',    | -                   |
| 13''     | 6.94 | s | -   | 127.0 | CH                  | 10'', 11'', 12'',<br>22''        | -                   |
| 14''     | -    | - | -   | 119.4 | -                   | -                                | -                   |
| 15''     | -    | - | -   | 149.0 | -                   | -                                | -                   |
| 16''     | -    | - | -   | 105.8 | -                   | -                                | -                   |
| 17''     | 2.89 | d | 8.2 | 20.0  | CH <sub>2</sub>     | 10'', 15'', 16'',<br>18'', 19''  | 18''                |
| 18''21'' | 1.98 | m | -   | 20.4  | 2 x CH <sub>2</sub> | 17'', 19'', 16'',<br>22''        | 17'', 20'',<br>22'' |
| 19''20'' | 3.35 | m | -   | 49.8  | 2 x CH <sub>2</sub> | 15'', 18'', 22''                 | 21''                |
| 22''     | 2.77 | m | -   | 27.4  | CH <sub>2</sub>     | 13'', 14'', 15'',<br>19'', 21'', | 21''                |

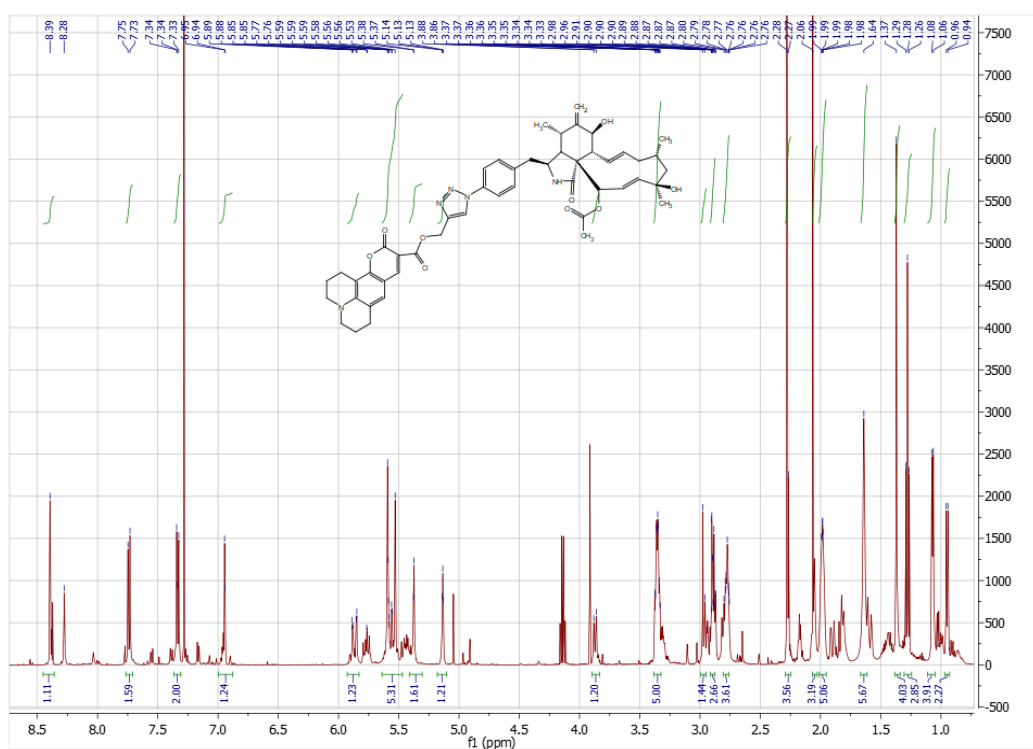



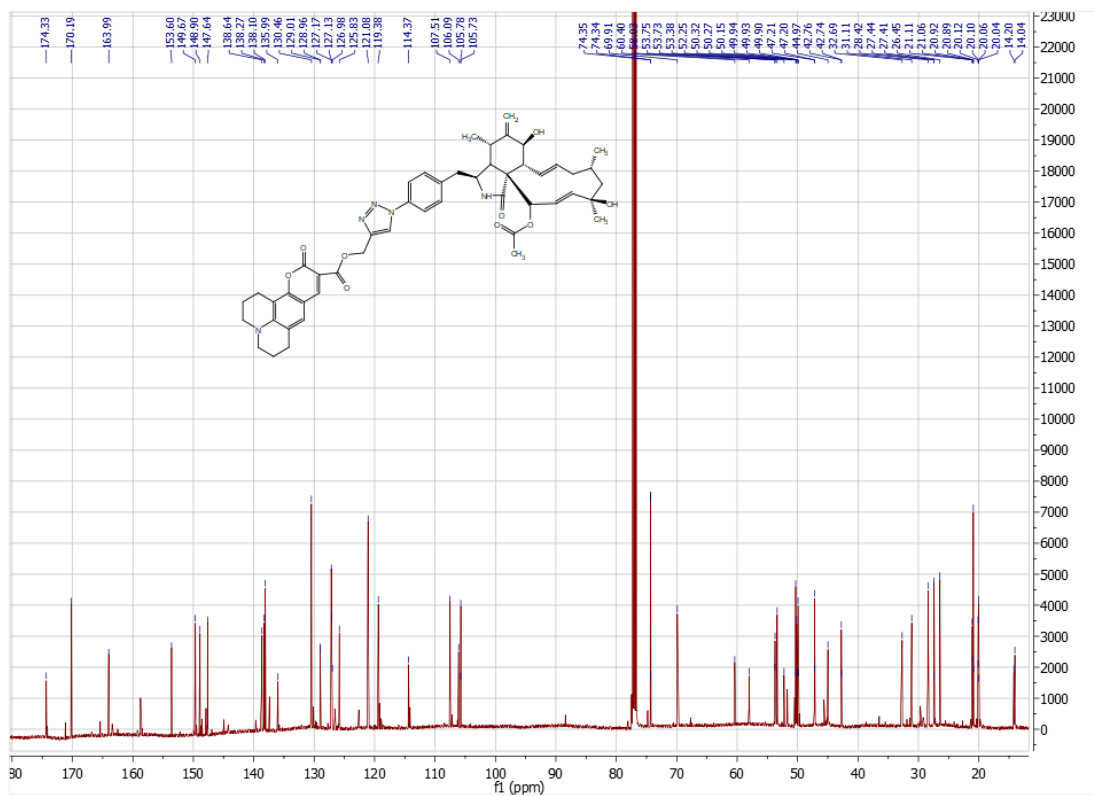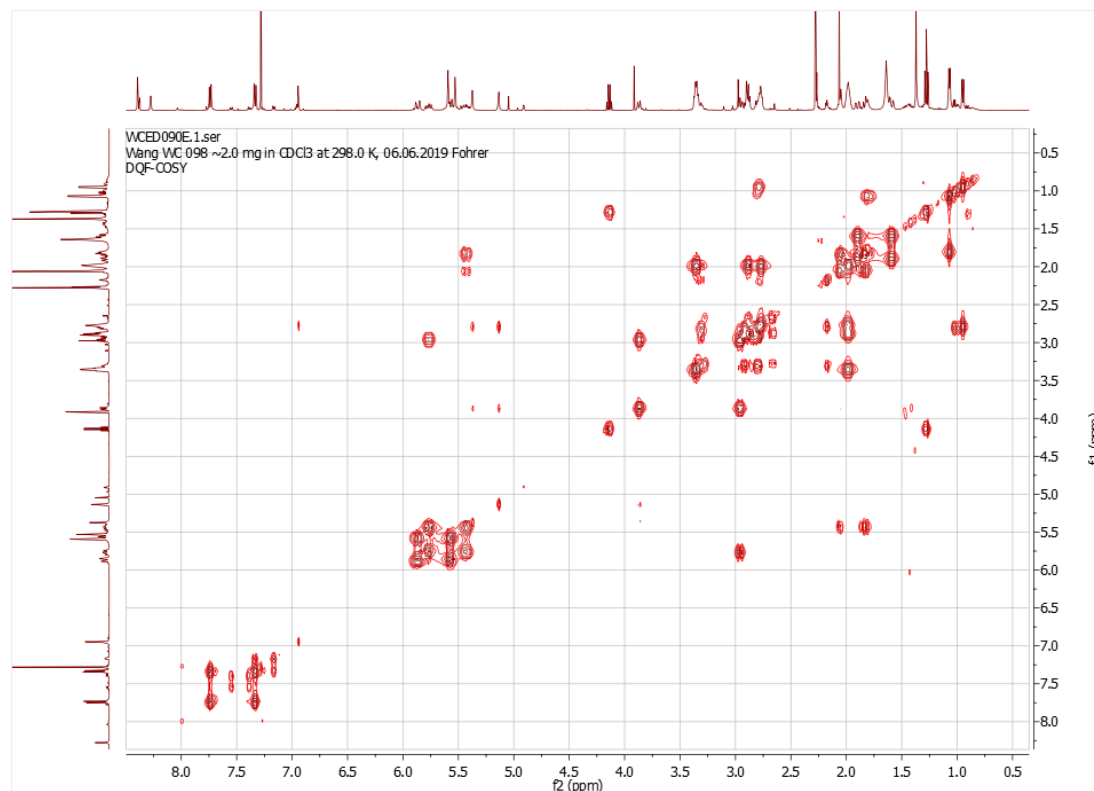

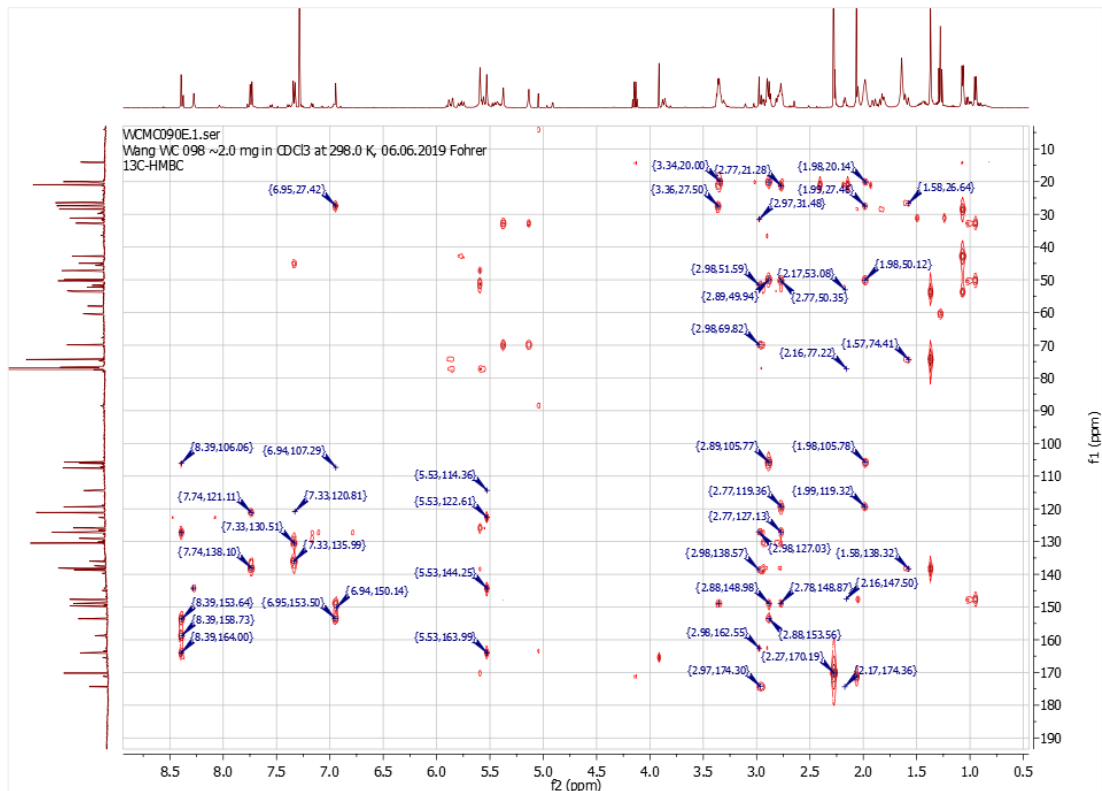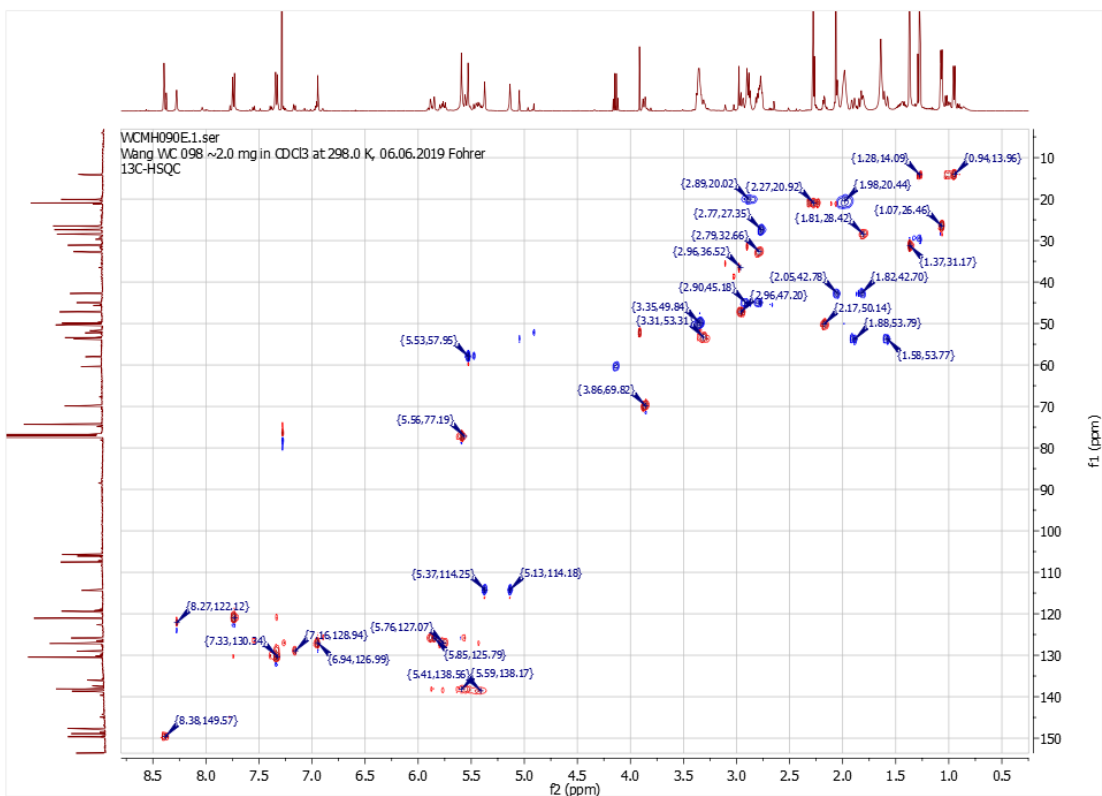

## 2.17 Dye-linked cytochalasin 17

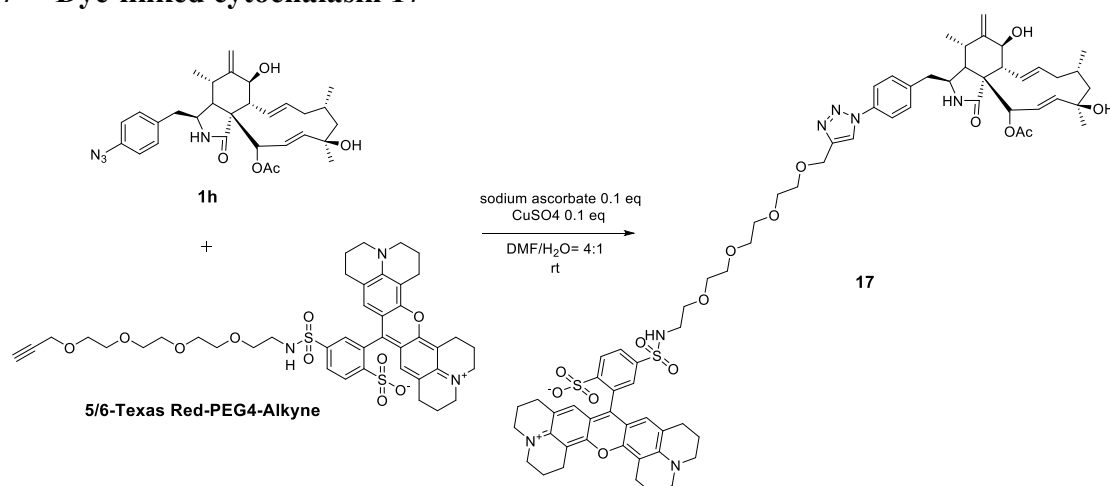

To a stirred solution of **1h** (5.6 mg, 0.02 mmol, 2.0 eq) and **5/6-Texas Red-PEG<sub>4</sub>-Alkyne** (4.0 mg, 0.005 mmol, 1.0 eq, purchased from Jena Bioscience) in 1.25 mL DMF-water mixture (4:1, v/v) was added sodium ascorbate (0.1 mg, 0.5  $\mu$ mol, 0.1 eq) and copper sulfate (0.06 mg, 0.5  $\mu$ mol, 0.1 eq). The mixture was stirred at room temperature for 12 hours under nitrogen and the solvent was removed *in vacuo*. The residue was dissolved in EtOAc (2 mL) and washed with water (2 mL x 2). The organic phase was dried over MgSO<sub>4</sub>, filtered and evaporated to dryness *in vacuo*. The residue was dissolved in MeOH and purified by LCMS to afford 2.6 mg of desired product (38.6%, 0.002 mmol) as a purple solid.

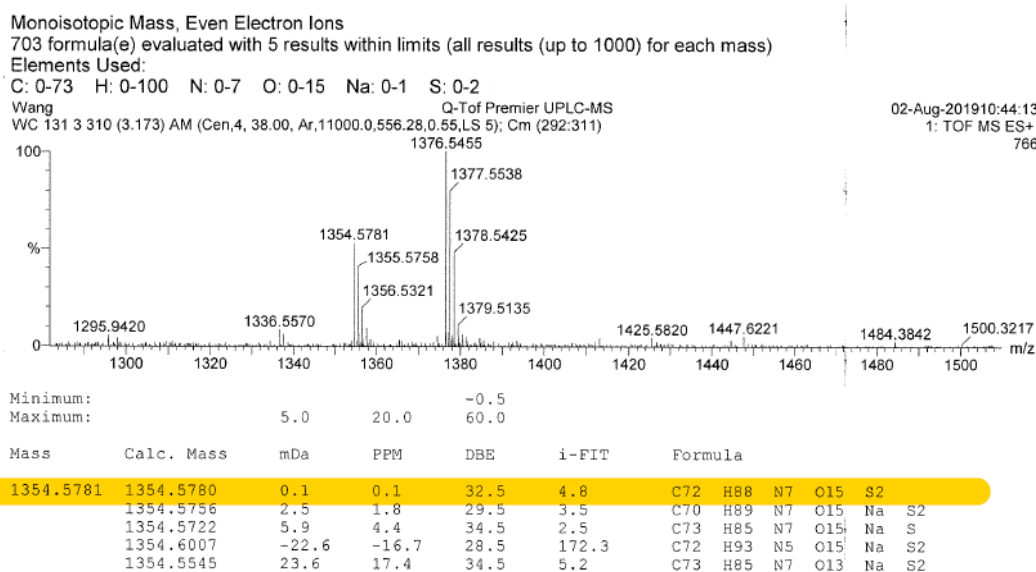

HRMS ( $m/z$ ): calculated for [C<sub>70</sub>H<sub>89</sub>N<sub>7</sub>O<sub>15</sub>S<sub>2</sub> + H]: 1354.5756, found: 1354.5781.

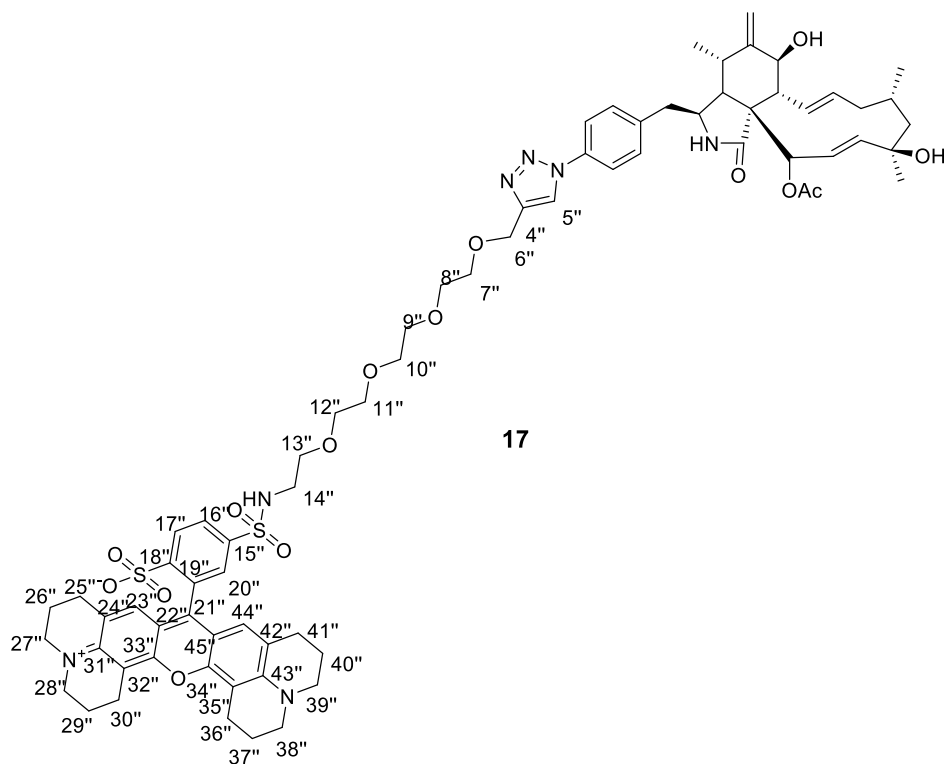

| Position | $\delta_H$ | M   | $J_{H-H}/\text{Hz}$ | $\delta_C$ | HSQC            | HMBC H to C      | H-H COSY  |
|----------|------------|-----|---------------------|------------|-----------------|------------------|-----------|
| 1        | -          | -   | -                   | 174.2      | -               | -                | -         |
| 3        | 3.27       | m   | -                   | 53.6       | CH              | 1', 1, 4, 5      | 4, 5, 10  |
| 4        | 2.15       | dd  | 3.7, 4.7            | 50.4       | CH              | 1, 3, 5, 6, 10   | 3, 5, 10  |
| 5        | 2.80       | m   | -                   | 32.9       | CH              | 1', 3            | 4, 11, 12 |
| 6        | -          | -   | -                   | 148.0      | -               | -                | -         |
| 7        | 3.85       | dd  | 1.4, 10.8           | 69.7       | CH              | 6, 12            | 8, 12     |
| 8        | 2.97       | m   | -                   | 47.2       | CH              | 7, 9, 13, 20, 21 | 7, 13     |
| 9        | -          | -   | -                   | 51.7       | -               | -                | -         |
| 10a      | 2.77       | m   | -                   | 45.0       | CH <sub>2</sub> | 1', 3            | 3, 4, 12  |
| 10b      | 2.90       | m   | -                   | -          | -               | -                | -         |
| 11       | 1.04       | d   | 6.7                 | 14.2       | CH <sub>3</sub> | 4, 5, 6          | 5         |
| 12a      | 5.14       | brs | -                   | 114.2      | CH <sub>2</sub> | 5, 6, 7          | 5, 7, 11  |
| 12b      | 5.38       | brs | -                   | -          | -               | -                | -         |
| 13       | 5.76       | ddd | 1.4, 9.7, 15.4      | 127.1      | CH              | 7, 8, 15         | 8, 14, 15 |
| 14       | 5.45       | m   | -                   | 138.7      | CH              | 9, 15            | 13, 15    |
| 15a      | 1.83       | m   | -                   | 42.7       | CH <sub>2</sub> | 13, 14, 16, 17   | 13, 14,   |
| 15b      | 2.05       | m   | -                   | -          | -               | -                | -         |
| 16       | 1.81       | m   | -                   | 28.5       | CH              | 13, 14, 17       | 22        |
| 17a      | 1.58       | m   | -                   | 53.8       | CH <sub>2</sub> | 18, 19           | -         |
| 17b      | 1.89       | m   | -                   | -          | -               | -                | -         |
| 18       | -          | -   | -                   | 74.3       | -               | -                | -         |
| 19       | 5.59       | brs | -                   | 138.1      | CH              | -                | 20        |
| 20       | 5.91       | dd  | 2.8, 16.5           | 125.8      | CH              | 18, 19           | 19        |
| 21       | 5.59       | brs | -                   | 77.4       | CH              | 8, 9, 19, 20, 23 | -         |
| 22       | 1.08       | d   | 6.5                 | 26.5       | CH <sub>3</sub> | 15, 16, 17       | 16        |
| 23       | 1.37       | s   | -                   | 31.2       | CH <sub>3</sub> | 17, 18, 19       | -         |
| 1'       | -          | -   | -                   | 137.7      | -               | -                | -         |
| 2' 6'    | 7.36       | d   | 8.1                 | 128.8      | 2 x CH          | 3', 4', 5', 10   | 3', 5'    |
| 3' 5'    | 7.79       | d   | 8.1                 | 120.8      | 2 x CH          | 1', 4'           | 2', 6'    |
| 4'       | -          | -   | -                   | 137.5      | -               | -                | -         |

|                              |      |   |     |       |                     |                              |          |
|------------------------------|------|---|-----|-------|---------------------|------------------------------|----------|
| 24                           | -    | - | -   | 170.1 | -                   | -                            | -        |
| 25                           | 2.26 | s | -   | 20.9  | CH <sub>3</sub>     | 24                           | -        |
| 4"                           | -    | - | -   | 145.9 | -                   | -                            | -        |
| 5"                           | 8.36 | s | -   | 121.2 | CH                  | 4"                           | -        |
| 6"                           | 4.81 | s | -   | 64.3  | CH <sub>2</sub>     | 4", 5", 7"                   | -        |
| 7", 8", 9",<br>10", 11", 12" | 3.68 | m | -   | 70.2  | 6 x CH <sub>2</sub> | 7", 8", 9",<br>10", 11", 12" | -        |
| 13"                          | 3.79 | m | -   | 69.7  | CH <sub>2</sub>     | -                            | 14"      |
| 14"                          | 3.34 | m | -   | 43.3  | CH <sub>2</sub>     | -                            | 13"      |
| 15"                          | -    | - | -   | 145.7 | -                   | -                            | -        |
| 16", 17"                     | 8.01 | d | 7.9 | 126.8 | 2 x CH              | 18", 19"                     | -        |
| 18"                          | -    | - | -   | 127.4 | -                   | -                            | -        |
| 19"                          | -    | - | -   | 131.5 | -                   | -                            | -        |
| 20"                          | 8.36 | s | -   | 121.2 | CH                  | 21", 22"                     | -        |
| 21"                          | -    | - | -   | 134.4 | -                   | -                            | -        |
| 22"                          | -    | - | -   | 126.5 | -                   | -                            | -        |
| 23"                          | 7.27 | s | -   | 127.1 | CH                  | 24", 31"                     | -        |
| 24"                          | -    | - | -   | 129.1 | -                   | -                            | -        |
| 25", 30"                     | 2.73 | m | -   | 27.4  | 2 x CH <sub>2</sub> | 23", 24"                     | -        |
| 26", 29"                     | 1.28 | m | -   | 29.6  | 2 x CH <sub>2</sub> | 25", 27"                     | -        |
| 27", 28"                     | 3.85 | m | -   | 47.2  | 2 x CH <sub>2</sub> | 26"                          | -        |
| 31"                          | -    | - | -   | 137.5 | -                   | -                            | -        |
| 32"                          | -    | - | -   | 73.6  | -                   | -                            | -        |
| 33"                          | -    | - | -   | 150.0 | -                   | -                            | -        |
| 34"                          | -    | - | -   | 129.0 | -                   | -                            | -        |
| 35"                          | -    | - | -   | 151.3 | -                   | -                            | -        |
| 36", 41"                     | 2.66 | m | -   | 27.4  | 2 x CH <sub>2</sub> | 34", 38"                     | 38"      |
| 37", 40"                     | 1.97 | m | -   | 20.6  | 2 x CH <sub>2</sub> | 36"                          | 38"      |
| 38", 25", 27", 39"           | 3.47 | m | -   | 50.5  | 2 x CH <sub>2</sub> | 37", 43"                     | 36", 37" |
| 42"                          | -    | - | -   | 113.7 | -                   | -                            | -        |
| 43"                          | -    | - | -   | 152.7 | -                   | -                            | -        |
| 44"                          | 6.83 | s | -   | 128.1 | CH                  | 41", 42", 43",<br>45"        | -        |
| 45"                          | -    | - | -   | 104.6 | -                   | -                            | -        |



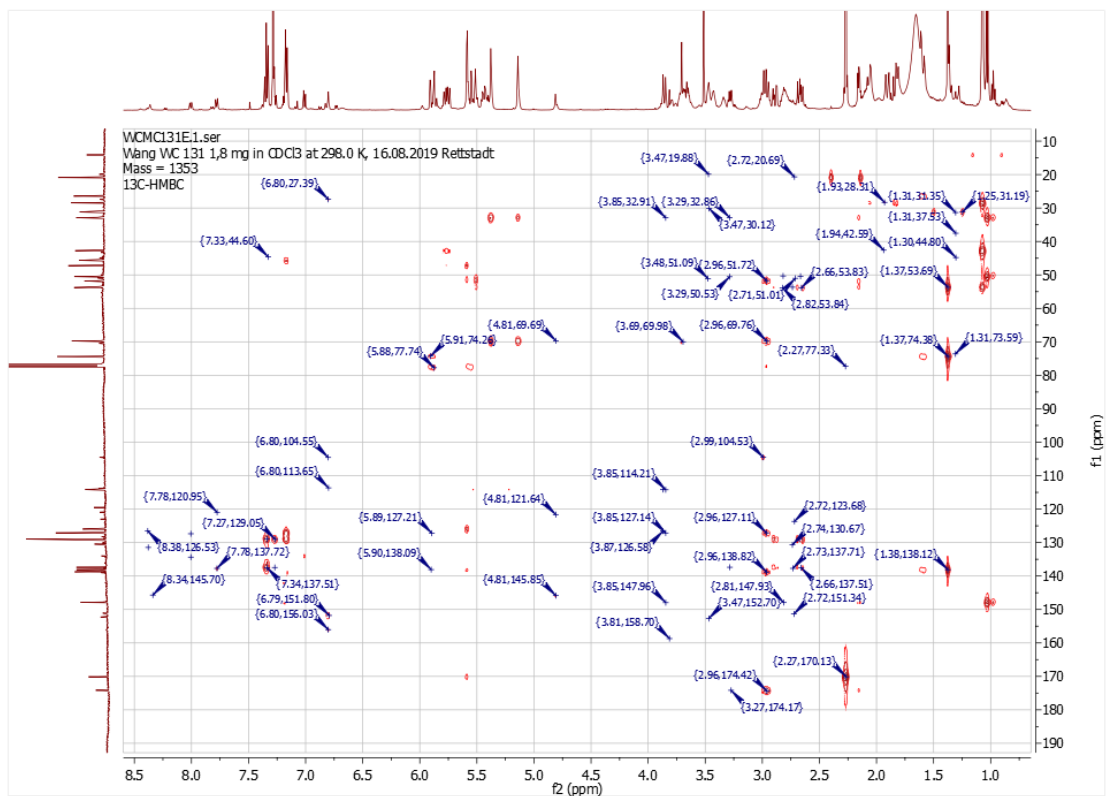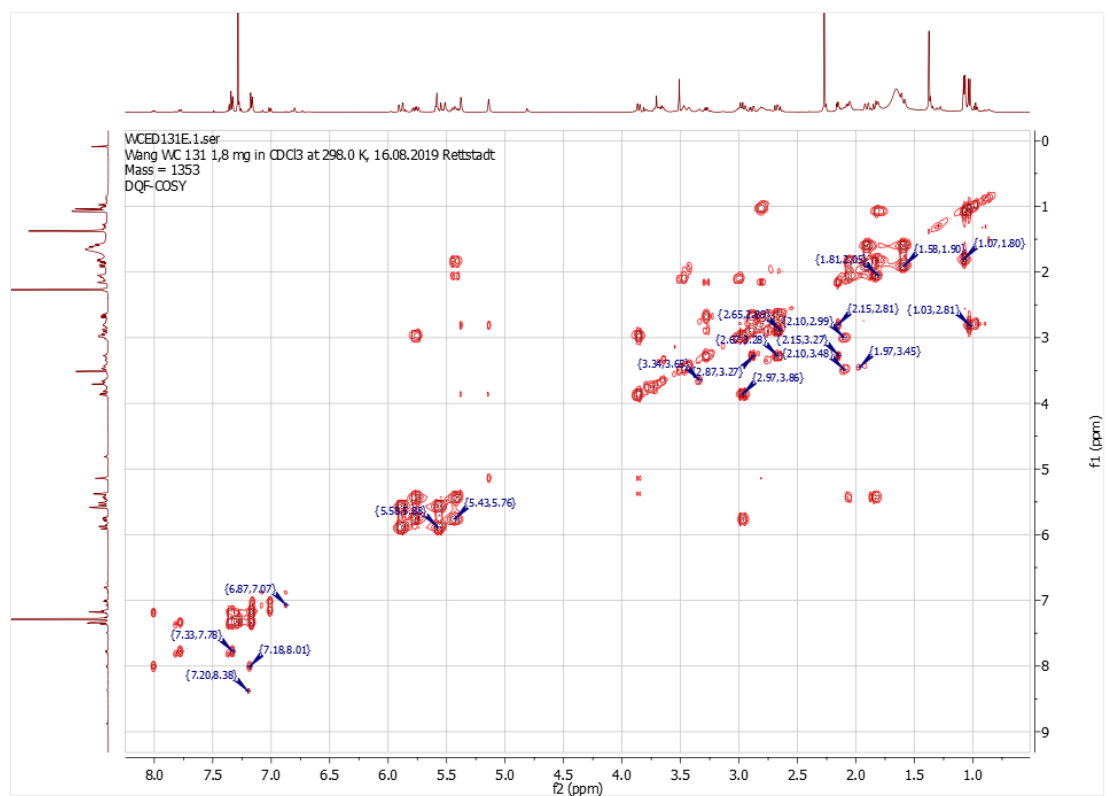

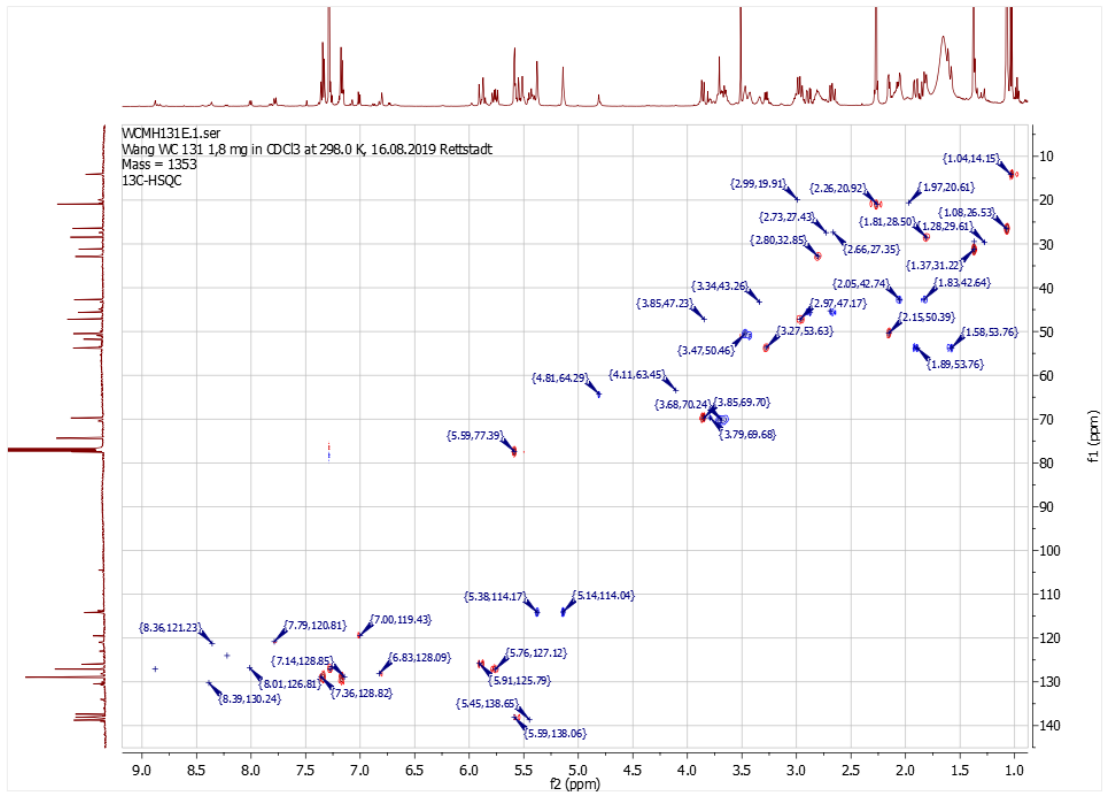



## 2.18 Dye-Linked Cytochalasin H 19

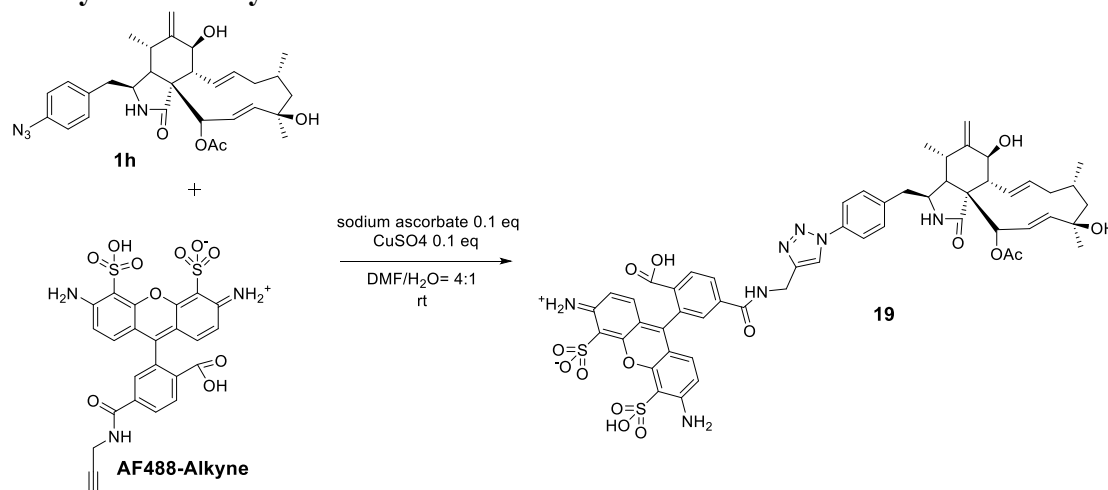

To a stirred solution of **1h** (5.6 mg, 0.02 mmol, 2.0 eq) and **AF488-Alkyne** (3.0 mg, 0.01 mmol, 1.0 eq, purchase from Jena Bioscience) in 4.25 mL DMF-water mixture (4:1, v/v) was added sodium ascorbate (0.2 mg, 1 μmol, 0.1 eq) and copper sulfate (0.12 mg, 1 μmol, 0.1 eq). The mixture was stirred at room temperature for 12 hours under nitrogen and the solvent was removed *in vacuo*. The residue was dissolved in EtOAc (2 mL) and washed with water (2 mL x 2). The organic phase was dried over MgSO<sub>4</sub>, filtered and evaporated to dryness *in vacuo*. The residue was dissolved in MeOH and purified by LCMS to afford 1.7 mg of desired product (28.5%, 0.001 mmol) as a red solid.

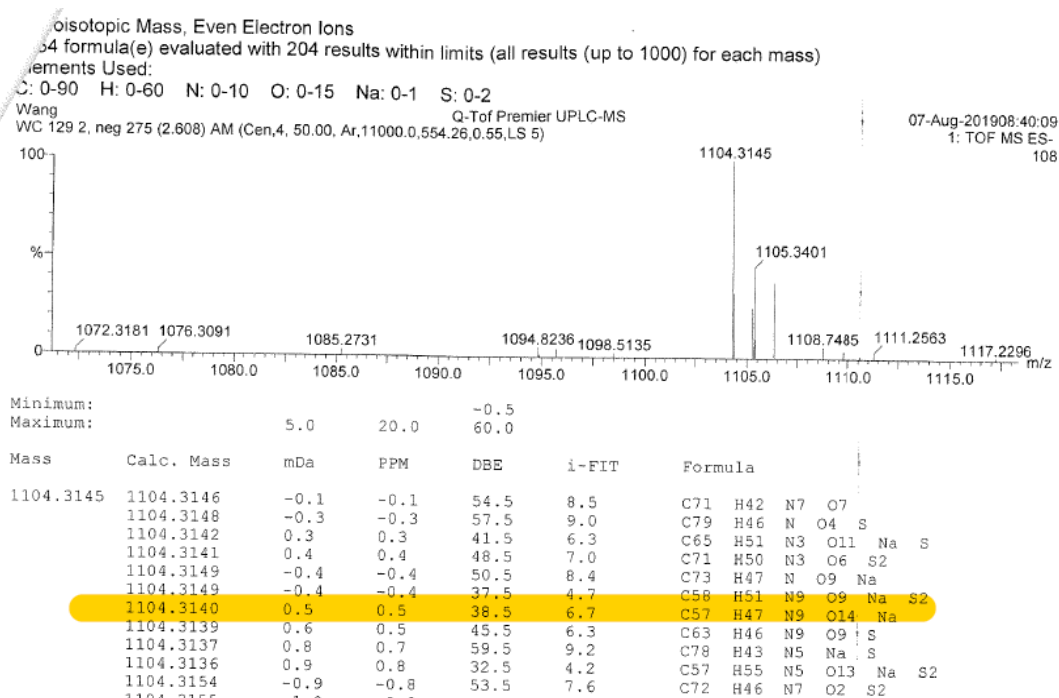

HRMS (*m/z*): calculated for [C<sub>57</sub>H<sub>47</sub>N<sub>9</sub>O<sub>9</sub>S<sub>2</sub> + Na]: 1104.3140, found: 1104.3145.

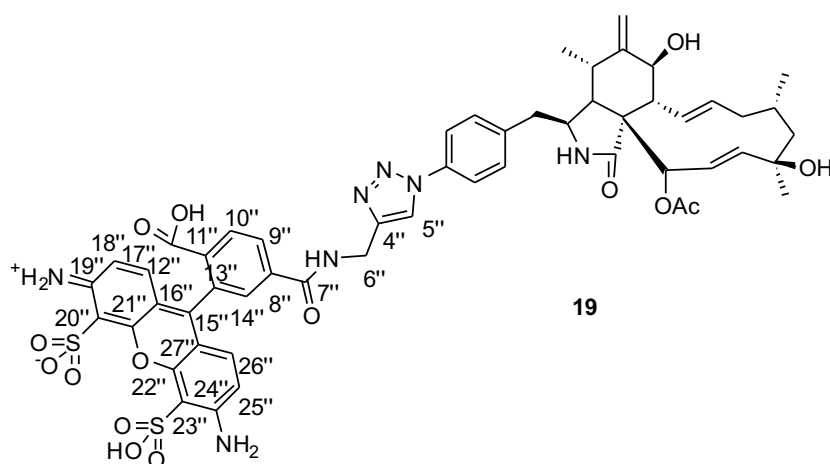

| Position | $\delta_H$ | M   | $J_{H-H}/\text{Hz}$ | $\delta_C$ | HSQC            | HMBC H to C   | H-H COSY |
|----------|------------|-----|---------------------|------------|-----------------|---------------|----------|
| 1        | -          | -   | -                   | 174.6      | -               | -             | -        |
| 3        | 3.15       | m   | -                   | 53.0       | CH              | 1             | 10       |
| 4        | 1.97       | dd  | 3.7, 5.0            | 48.3       | CH              | 3, 5          | 5        |
| 5        | 2.51       | m   | -                   | 32.2       | CH              | 1', 3         | 4        |
| 6        | -          | -   | -                   | 146.1      | -               | -             | -        |
| 7        | 3.63       | dd  | 1.3, 10.8           | 71.0       | CH              | -             | 8        |
| 8        | 2.74       | m   | -                   | 46.6       | CH              | -             | 7        |
| 9        | -          | -   | -                   | 52.4       | -               | -             | -        |
| 10a      | 2.66       | m   | -                   | 43.8       | CH <sub>2</sub> | 1', 3         | 3        |
| 10b      | 2.85       | m   | -                   | -          | -               | -             | -        |
| 11       | 0.48       | d   | 6.6                 | 13.7       | CH <sub>3</sub> | 4, 5, 6       | 5        |
| 12a      | 4.84       | brs | -                   | 111.8      | CH <sub>2</sub> | 5, 6, 7       | 7        |
| 12b      | 5.06       | brs | -                   | -          | -               | -             | -        |
| 13       | 5.54       | ddd | 1.4, 9.7, 15.4      | 129.2      | CH              | 7, 8, 15      | 8        |
| 14       | 5.09       | ddd | 4.8, 10.1, 15.4     | 134.9      | CH              | 9, 15         | 13, 15   |
| 15a      | 1.62       | m   | -                   | 43.5       | CH <sub>2</sub> | 114, 16,      | 13, 14,  |
| 15b      | 1.90       | m   | -                   | -          | -               | -             | -        |
| 16       | 1.69       | m   | -                   | 28.2       | CH              | 13, 14, 17    | 22       |
| 17a      | 1.39       | m   | -                   | 54.3       | CH <sub>2</sub> | 18, 19        | -        |
| 17b      | 1.60       | m   | -                   | -          | -               | -             | -        |
| 18       | -          | -   | -                   | 72.7       | -               | -             | -        |
| 19       | 5.39       | brs | -                   | 138.4      | CH              | -             | 20       |
| 20       | 5.68       | dd  | 2.2, 17.0           | 125.8      | CH              | 18, 19        | 19       |
| 21       | 5.29       | brs | -                   | 77.0       | CH              | 19, 20        | -        |
| 22       | 0.95       | d   | 6.4                 | 26.7       | CH <sub>3</sub> | 15, 16, 17    | 16       |
| 23       | 1.14       | s   | -                   | 31.4       | CH <sub>3</sub> | 17, 18, 19    | -        |
| 1'       | -          | -   | -                   | 138.3      | -               | -             | -        |
| 2' 6'    | 7.35       | d   | 8.5                 | 131.3      | 2 x CH          | 3', 4', 5'    | 3', 5'   |
| 3' 5'    | 7.84       | d   | 8.5                 | 120.0      | 2 x CH          | 1', 4'        | 2', 6'   |
| 4'       | -          | -   | -                   | 135.6      | -               | -             | -        |
| 24       | -          | -   | -                   | 170.6      | -               | -             | -        |
| 25       | 2.24       | s   | -                   | 21.1       | CH <sub>3</sub> | 24            | -        |
| 4''      | -          | -   | -                   | 146.0      | -               | -             | -        |
| 5''      | 8.65       | s   | -                   | 121.0      | CH              | 4''           | -        |
| 6''      | 4.54       | s   | -                   | 35.6       | CH <sub>2</sub> | 4'', 5'', 7'' | -        |
| 7''      | -          | -   | -                   | 168.7      | -               | -             | -        |
| 8''      | -          | -   | -                   | 140.4      | -               | -             | -        |
| 9''      | 8.05       | d   | 7.7                 | 125.3      | CH              | 8''           | 10''     |

|            |      |    |           |       |        |                 |     |
|------------|------|----|-----------|-------|--------|-----------------|-----|
| 10''       | 8.19 | d  | 7.7       | 129.6 | CH     | 9'', 11'', 12'' | 9'' |
| 11''       | -    | -  | -         | 130.3 | -      | -               | -   |
| 12''       | -    | -  | -         | 165.5 | -      | -               | -   |
| 13''       | -    | -  | -         | 138.3 | -      | -               | -   |
| 14''       | 7.71 | s  | -         | 123.1 | CH     | 12'', 15''      | -   |
| 15''       | -    | -  | -         | 129.3 | -      | -               | -   |
| 16''       | -    | -  | -         | 130.0 | -      | -               | -   |
| 17''       | 5.68 | dd | 8.8, 15.5 | 138.3 | CH     | -               | -   |
| 18''       | 6.47 | d  | 8.8       | 114.1 | CH     | 19'', 20''      | -   |
| 19'', 24'' | -    | -  | -         | 114.7 | 2 x CH | -               | -   |
| 20''       | -    | -  | -         | 105.2 | -      | -               | -   |
| 21''       | -    | -  | -         | 151.2 | -      | -               | -   |
| 22''       | -    | -  | -         | 149.4 | -      | -               | -   |
| 23''       | -    | -  | -         | 114.6 | -      | -               | -   |
| 25''       | 6.36 | d  | 8.8       | 129.5 | CH     | 22''            | -   |
| 26''       | 5.06 | m  | -         | 134.9 | 2 x CH | -               | -   |
| 27''       | -    | -  | -         | 105.5 | -      | -               | -   |

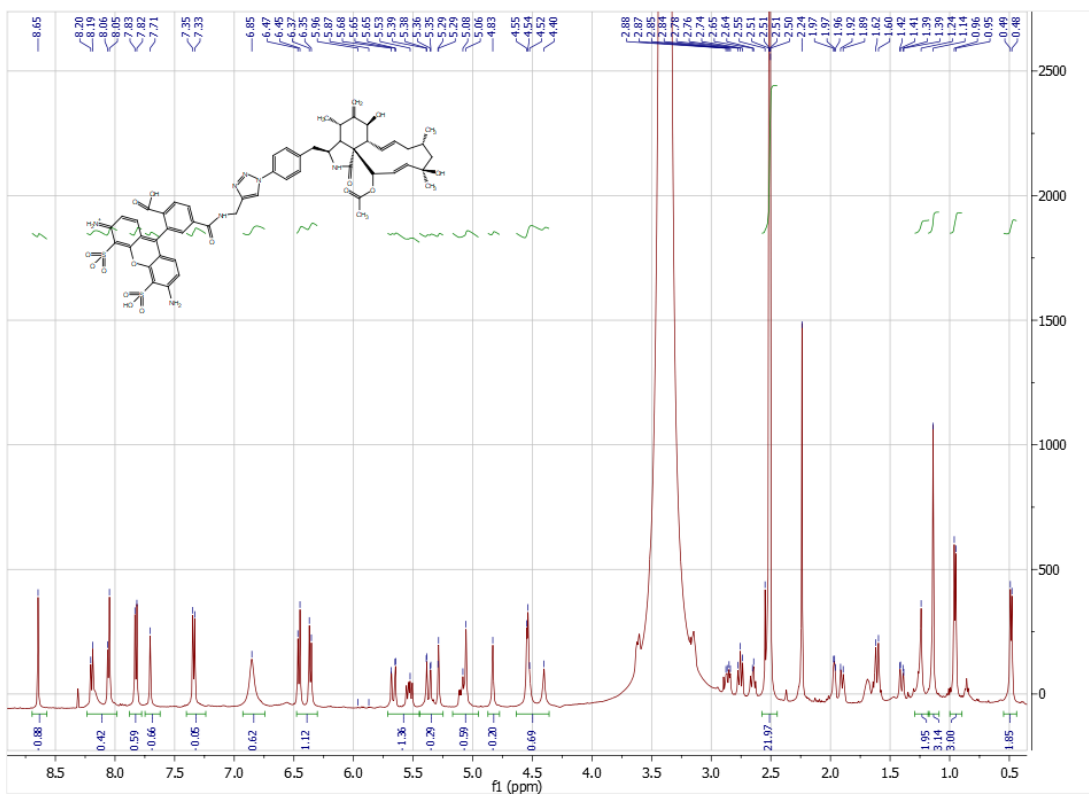

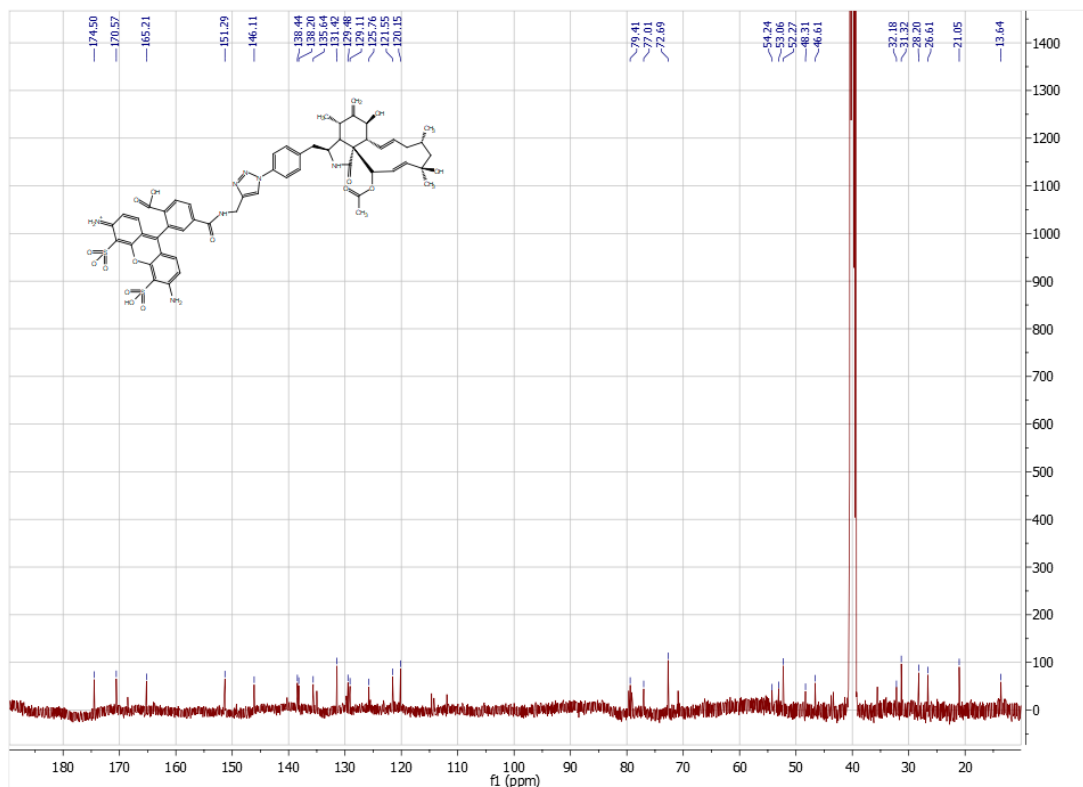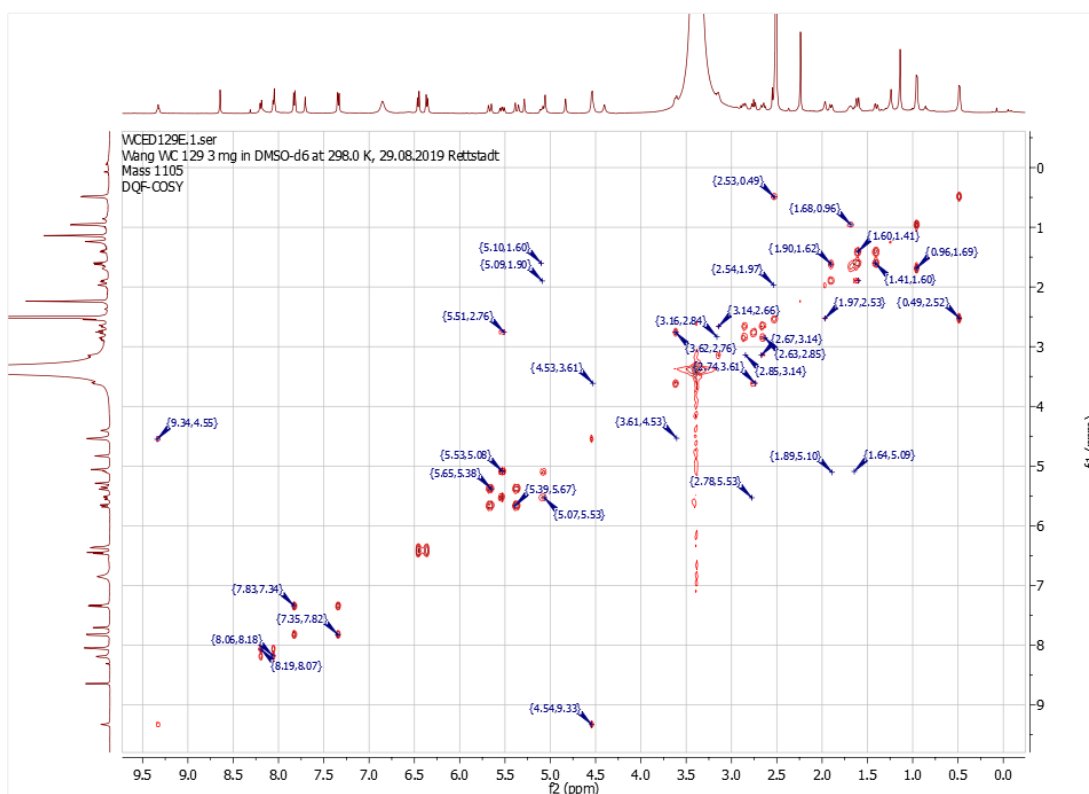

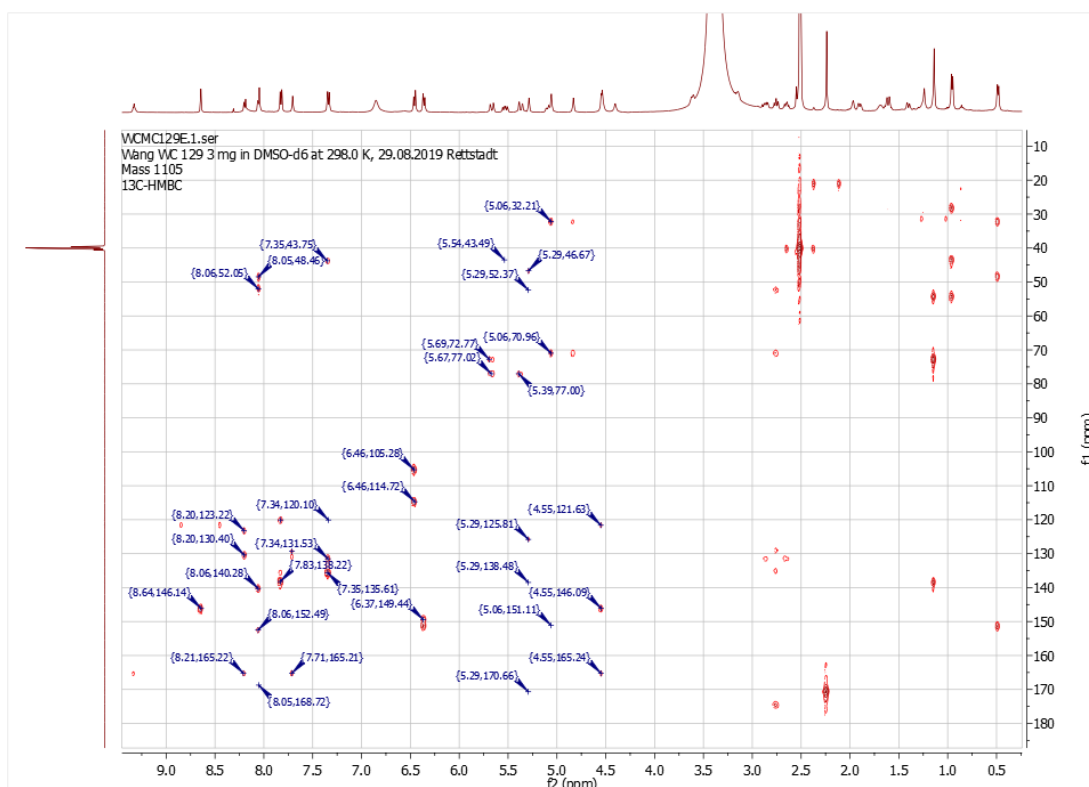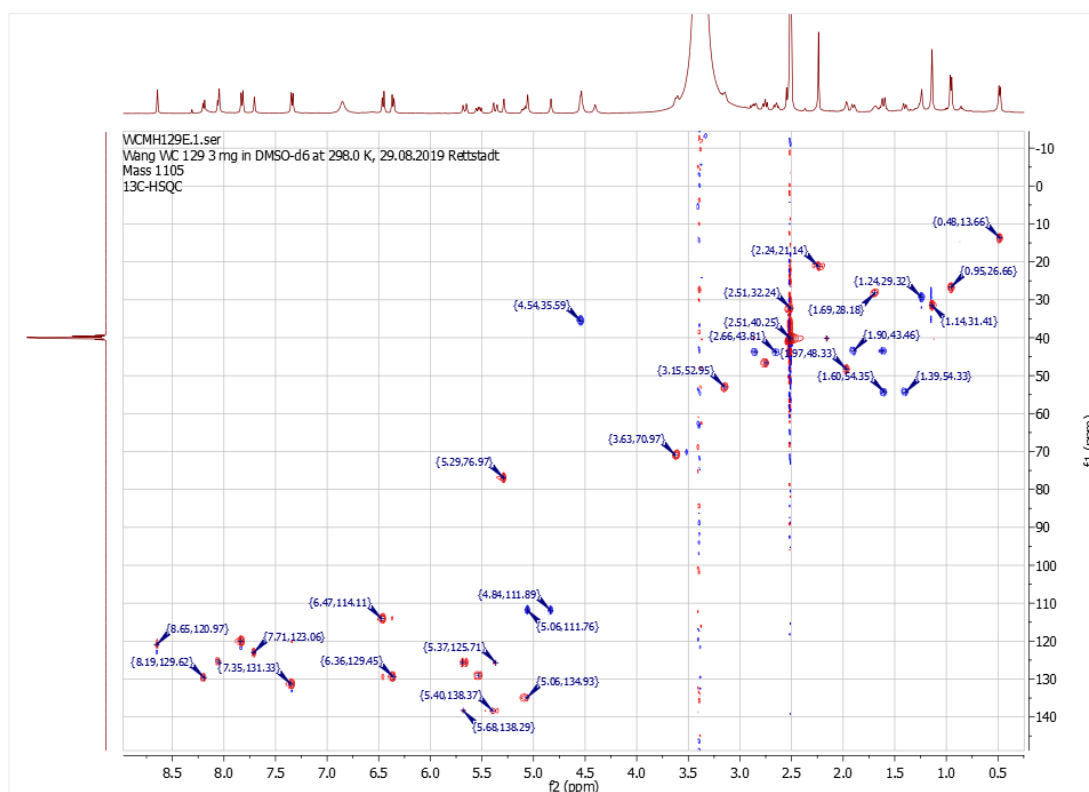

## 2.19 4'-Dye-Linked Cytochalasin H 21

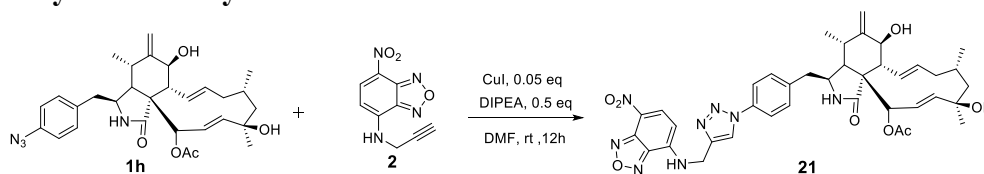

To a stirred solution of **1h** (10 mg, 0.019 mmol, 1.0 eq) and 7-nitro-4-(prop-2-ynylamino) benzofuran **2** (4.5 mg, 0.021 mmol, 1.1 eq) in DMF (2 mL) was added CuI (0.2 mg, 0.95  $\mu$ mol, 0.05 eq) and DIPEA (1.2 mg, 9.5  $\mu$ mol, 0.5 eq). The mixture was stirred at room temperature for 12 hours under nitrogen and the solvent was removed *in vacuo*. The residue was dissolved in EtOAc (2 mL) and washed with water (2 mL x 2). The organic phase was dried over MgSO<sub>4</sub>, filtered and evaporated to dryness *in vacuo*. The residue was dissolved in MeOH and purified by LCMS to afford 8.6 mg of desired product (61.1%, 0.011 mmol) as a brown solid.

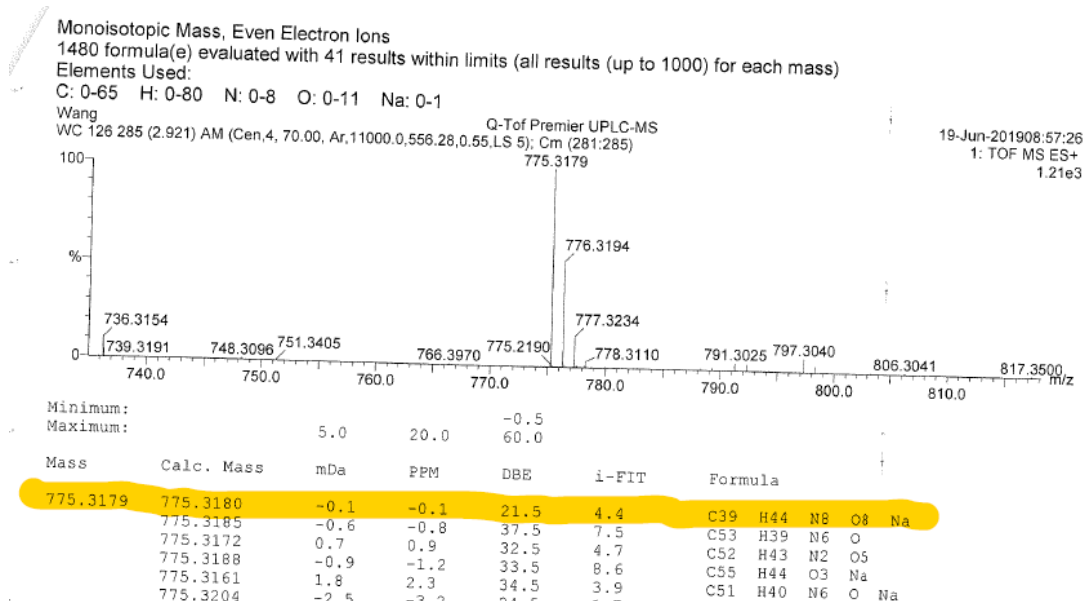

HRMS ( $m/z$ ): calculated for [C<sub>39</sub>H<sub>44</sub>N<sub>8</sub>O<sub>8</sub> + Na]: 775.3180, found: 775.3179.

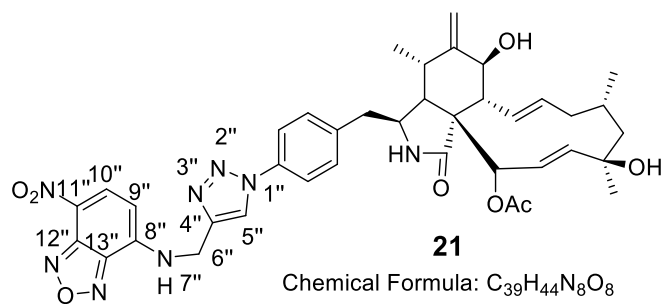

| Position | $\delta_H$ | M   | $J_{H-H}/\text{Hz}$ | $\delta_C$ | HSQC            | HMBC H to C            | H-H COSY  |
|----------|------------|-----|---------------------|------------|-----------------|------------------------|-----------|
| 1        | -          | -   | -                   | 174.5      | -               | -                      | -         |
| 2        | 5.56       | brs | -                   | -          | -               | -                      | -         |
| 3        | 3.35       | m   | -                   | 53.3       | CH              | -                      | 4, 5, 10  |
| 4        | 2.17       | dd  | 3.8, 5.0            | 50.3       | CH              | 1, 3, 5, 6, 10         | 3, 5, 10  |
| 5        | 2.81       | m   | -                   | 32.9       | CH              | 1', 3                  | 4, 11, 12 |
| 6        | -          | -   | -                   | 147.8      | -               | -                      | -         |
| 7        | 3.86       | dd  | 1.6, 10.7           | 69.7       | CH              | 6, 12                  | 8, 12     |
| 8        | 2.96       | m   | -                   | 47.3       | CH              | 1, 7, 9, 13, 20,<br>21 | 7, 13     |
| 9        | -          | -   | -                   | 51.8       | -               | -                      | -         |
| 10a      | 2.78       | m   | -                   | 44.9       | CH <sub>2</sub> | 1', 3                  | 3, 4, 12  |
| 10b      | 2.98       | m   | -                   | -          | -               | -                      | -         |
| 11       | 1.03       | d   | 6.7                 | 14.3       | CH <sub>3</sub> | 4, 5, 6                | 5         |
| 12a      | 5.14       | brs | -                   | 114.3      | CH <sub>2</sub> | 5, 6, 7                | 5, 7, 11  |
| 12b      | 5.39       | brs | -                   | -          | -               | -                      | -         |
| 13       | 5.74       | m   | -                   | 126.9      | CH              | 7, 8, 15               | 8, 14, 15 |
| 14       | 5.43       | m   | -                   | 138.8      | CH              | 9, 15                  | 13, 15    |
| 15a      | 1.82       | m   | -                   | 42.8       | CH <sub>2</sub> | 13, 14, 16, 17         | 13, 14,   |
| 15b      | 2.06       | m   | -                   | -          | -               | -                      | -         |
| 16       | 1.81       | m   | -                   | 28.4       | CH              | 13, 14, 17             | 22        |
| 17a      | 1.60       | m   | -                   | 53.9       | CH <sub>2</sub> | 18, 19                 | -         |
| 17b      | 1.88       | m   | -                   | -          | -               | -                      | -         |
| 18       | -          | -   | -                   | 74.4       | -               | -                      | -         |
| 19       | 5.57       | brs | -                   | 138.2      | CH              | -                      | 20        |
| 20       | 5.85       | dd  | 3.0, 16.2           | 125.7      | CH              | 18, 19                 | 19        |
| 21       | 5.46       | brs | -                   | 77.2       | CH              | 8, 9, 19, 20, 23       | -         |
| 22       | 1.07       | d   | 6.5                 | 26.5       | CH <sub>3</sub> | 15, 16, 17             | 16        |
| 23       | 1.37       | s   | -                   | 31.2       | CH <sub>3</sub> | 17, 18, 19             | -         |
| 1'       | -          | -   | -                   | 130.7      | -               | -                      | -         |
| 2' 6'    | 7.35       | d   | 8.5                 | 130.6      | 2 x CH          | 3', 4', 5', 10         | 3', 5'    |
| 3' 5'    | 7.69       | d   | 8.5                 | 121.2      | 2 x CH          | 1', 4'                 | 2', 6'    |
| 4'       | -          | -   | -                   | 135.6      | -               | -                      | -         |
| 24       | -          | -   | -                   | 170.1      | -               | -                      | -         |
| 25       | 2.26       | s   | -                   | 21.0       | CH <sub>3</sub> | 24                     | -         |
| 4''      | -          | -   | -                   | 144.2      | -               | -                      | -         |
| 5''      | 8.04       | s   | -                   | 119.9      | CH              | 4''                    | -         |
| 6''      | 4.93       | s   | -                   | 39.4       | CH <sub>2</sub> | -                      | -         |
| 8''      | -          | -   | -                   | 143.1      | -               | -                      | -         |
| 9''      | 6.44       | d   | 8.6                 | 99.7       | CH              | 11'', 12''             | 10''      |
| 10''     | 8.54       | d   | 8.5                 | 135.9      | CH              | 11'', 13''             | 9''       |
| 11''     | -          | -   | -                   | 125.2      | -               | -                      | -         |
| 12''     | -          | -   | -                   | 144.3      | -               | -                      | -         |
| 13''     | -          | -   | -                   | 143.4      | -               | -                      | -         |

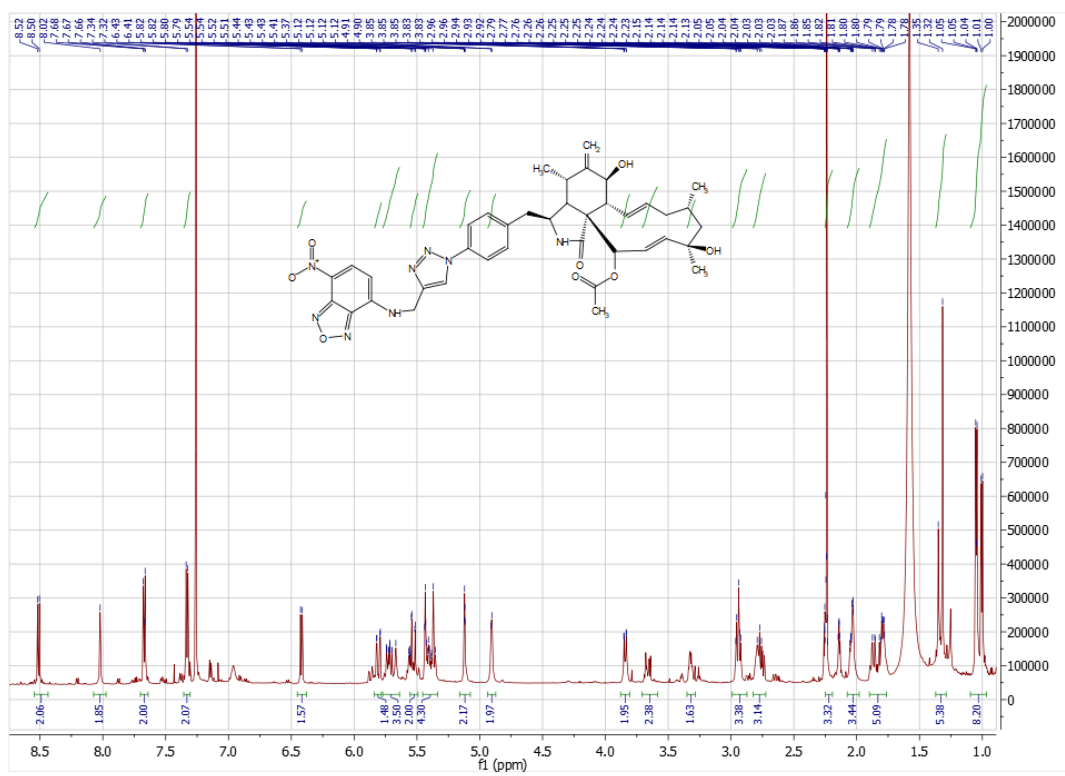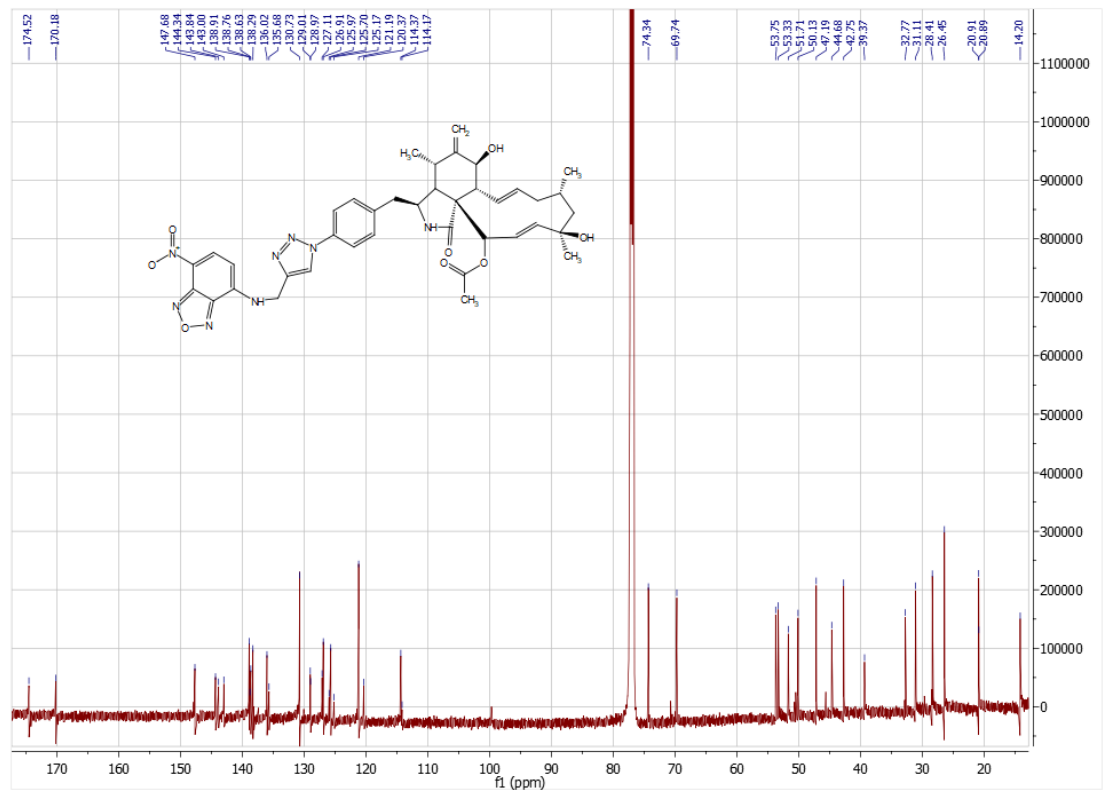



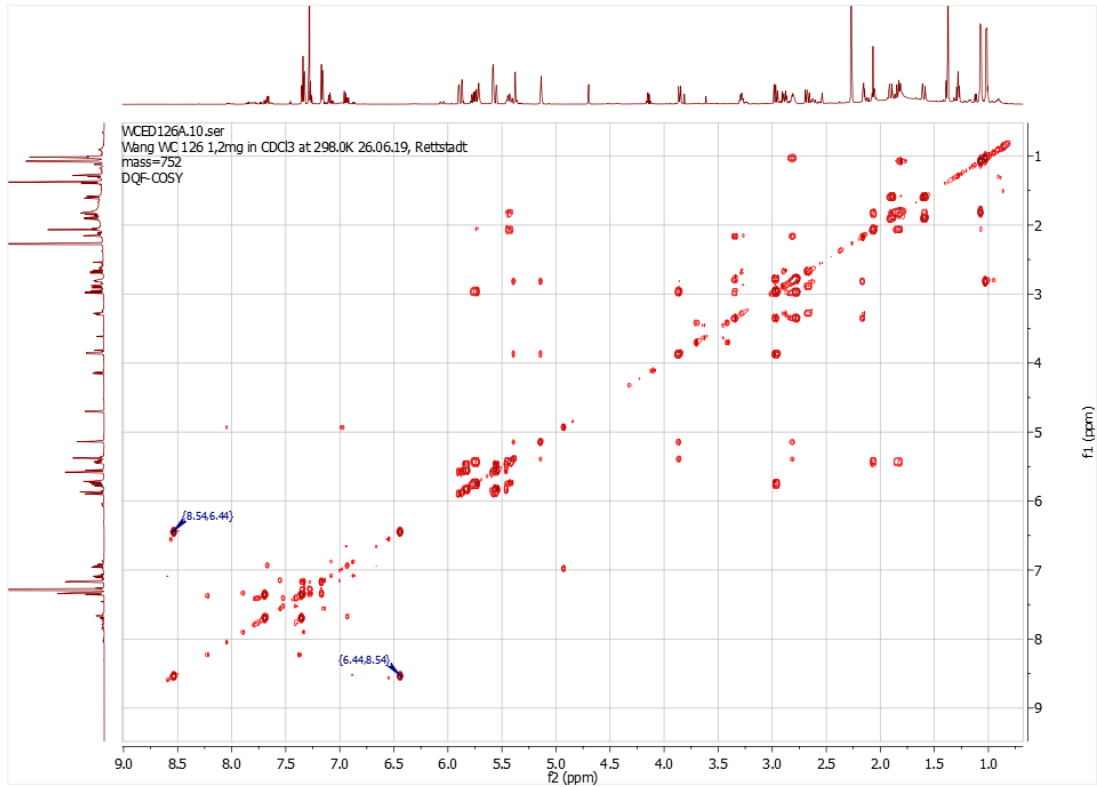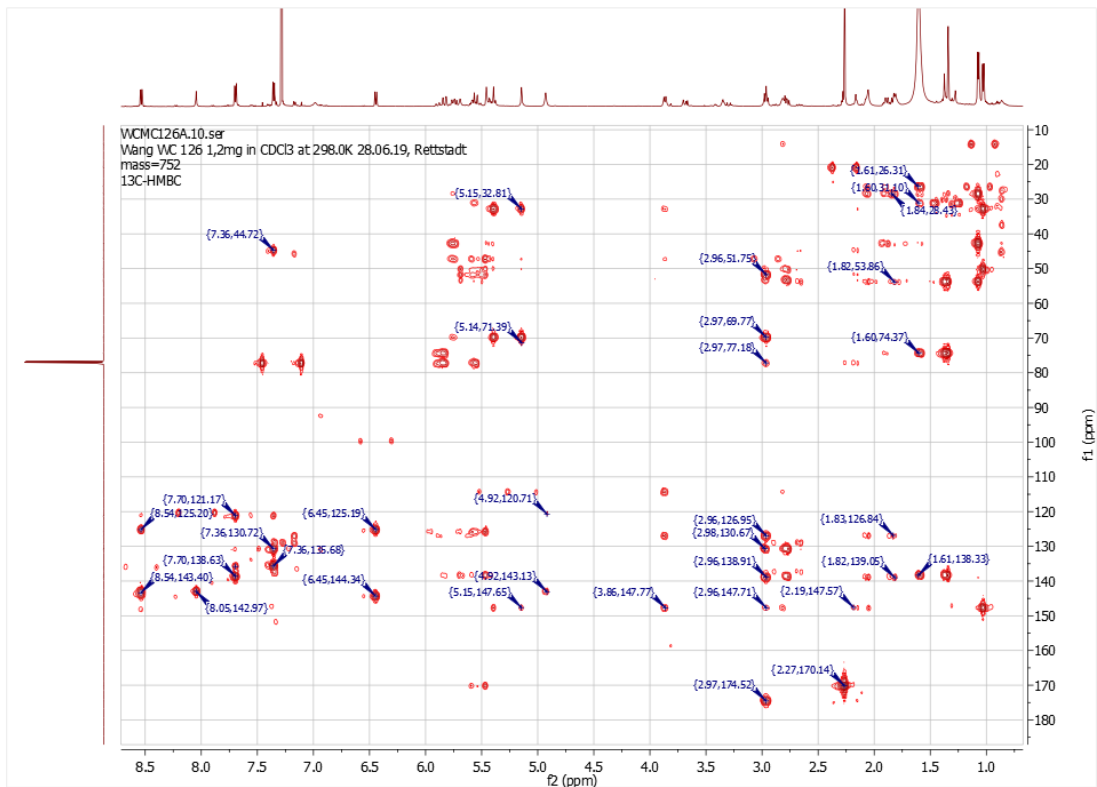

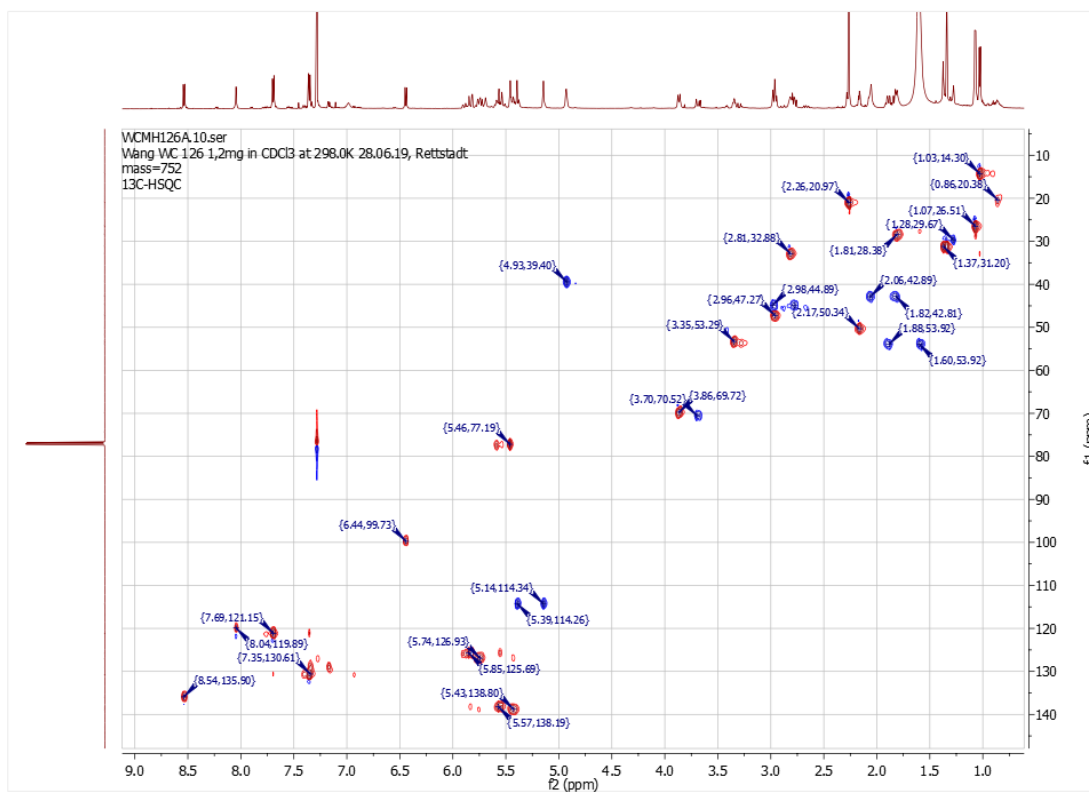

## 2.20 4'-Prop-1-ynyl Cytochalsin H 22

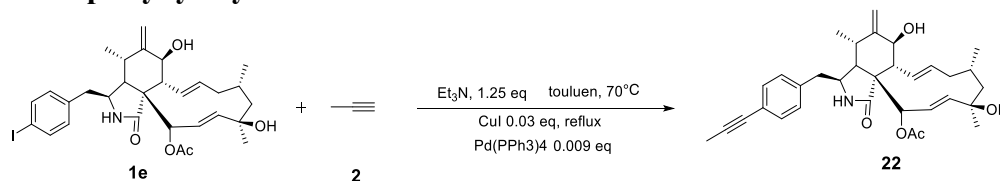

To a stirred solution of **1e** (10 mg, 0.019 mmol, 1.0 eq) and **2** (2.0 mg, 0.038 mmol, 2.0 eq, purchased from Sigma-Aldrich) in toluene (2 mL) was added CuI (0.2 mg, 0.95  $\mu$ mol, 0.05 eq), Et<sub>3</sub>N (3.0 mg, 0.03 mmol, 1.5 eq) and Pd(PPh<sub>3</sub>)<sub>4</sub> (0.2 mg, 0.1  $\mu$ mol, 0.009 eq). The mixture was stirred at 80 °C for 12 hours under nitrogen and the solvent was removed *in vacuo*. The residue was dissolved in EtOAc (2 mL) and washed with water (2 mL x 2). The organic phase was dried over MgSO<sub>4</sub>, filtered and evaporated to dryness *in vacuo*. The residue was dissolved in MeOH and purified by LCMS to afford 6.7 mg of desired product (78.2%, 0.012 mmol) as a yellow solid.

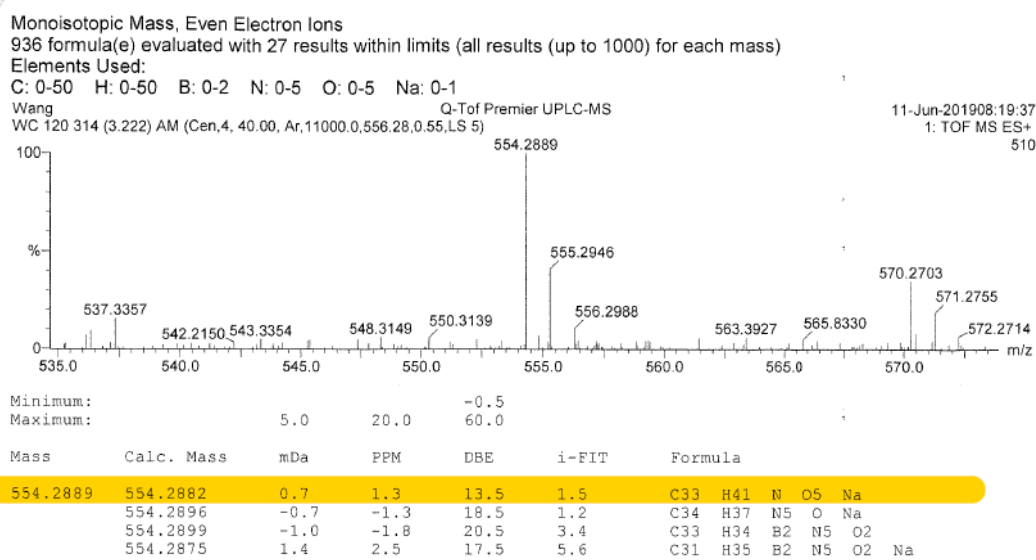

HRMS ( $m/z$ ): calculated for [C<sub>33</sub>H<sub>41</sub>NO<sub>5</sub> + Na]: 554.2882, found: 554.2889.

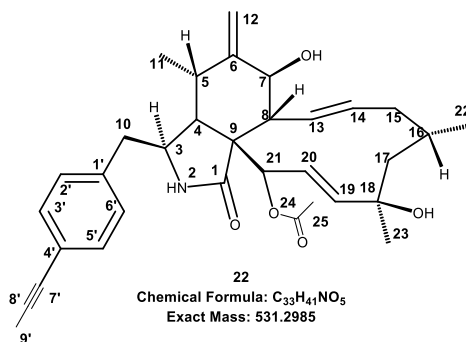

| Position | $\delta_H$ | M   | $J_{H-H}/\text{Hz}$ | $\delta_C$ | HSQC            | HMBC H to C        | H-H COSY  |
|----------|------------|-----|---------------------|------------|-----------------|--------------------|-----------|
| 1        | -          | -   | -                   | 174.2      | -               | -                  | -         |
| 3        | 3.24       | ddd | 1.1, 4.4, 9.1       | 53.3       | CH              | 1', 4, 5           | 4, 5, 10  |
| 4        | 2.13       | t   | 4.4                 | 50.6       | CH              | 3, 5               | 3, 5, 10  |
| 5        | 2.78       | m   | -                   | 32.7       | CH              | 1', 3              | 4, 11, 12 |
| 6        | -          | -   | -                   | 147.9      | -               | -                  | -         |
| 7        | 3.85       | d   | 10.2                | 69.6       | CH              | 5, 6, 8, 12, 13    | 8, 12     |
| 8        | 2.95       | t   | 10.2                | 47.2       | CH              | 1, 7, 9, 13, 21    | 7, 13     |
| 9        | -          | -   | -                   | 51.7       | -               | -                  | -         |
| 10a      | 2.67       | dd  | 9.5, 13.5           | 45.6       | CH <sub>2</sub> | 1', 3              | 3, 4, 12  |
| 10b      | 2.82       | dd  | 4.8, 13.5           | -          | -               | -                  | -         |
| 11       | 0.98       | d   | 6.7                 | 14.1       | CH <sub>3</sub> | 4, 5, 6            | 5         |
| 12a      | 5.12       | brs | -                   | 114.2      | CH <sub>2</sub> | 5, 6, 7            | 5, 7, 11  |
| 12b      | 5.37       | brs | -                   | -          | -               | -                  | -         |
| 13       | 5.76       | ddd | 1.4, 9.6, 15.5      | 126.9      | CH              | 7, 8, 15           | 8, 14, 15 |
| 14       | 5.42       | ddd | 4.8, 10.3, 15.5     | 138.4      | CH              | 9, 15              | 13, 15    |
| 15a      | 1.82       | m   | -                   | 42.7       | CH <sub>2</sub> | 13, 14, 16, 17     | 13, 14,   |
| 15b      | 2.05       | m   | -                   | -          | -               | -                  | -         |
| 16       | 1.80       | m   | -                   | 28.7       | CH              | 13, 14, 17         | 22        |
| 17a      | 1.57       | m   | -                   | 53.7       | CH <sub>2</sub> | 18, 19             | -         |
| 17b      | 1.91       | m   | -                   | -          | -               | -                  | -         |
| 18       | -          | -   | -                   | 74.4       | -               | -                  | -         |
| 19       | 5.54       | brs | -                   | 138.0      | CH              | -                  | 20        |
| 20       | 5.90       | dd  | 2.9, 16.4           | 126.0      | CH              | 18, 19             | 19        |
| 21       | 5.60       | brs | -                   | 77.5       | CH              | 8, 9, 19, 20, 23   | -         |
| 22       | 1.06       | d   | 6.5                 | 26.1       | CH <sub>3</sub> | 15, 16, 17         | 16        |
| 23       | 1.37       | s   | -                   | 31.2       | CH <sub>3</sub> | 17, 18, 19         | -         |
| 1'       | -          | -   | -                   | 132.0      | -               | -                  | -         |
| 2' 6'    | 7.09       | d   | 8.2                 | 128.8      | 2 x CH          | 3', 4', 5', 10     | 3', 5'    |
| 3' 5'    | 7.36       | d   | 8.2                 | 131.9      | 2 x CH          | 1', 4'             | 2', 6'    |
| 4'       | -          | -   | -                   | 122.9      | -               | -                  | -         |
| 24       | -          | -   | -                   | 170.2      | -               | -                  | -         |
| 25       | 2.27       | s   | -                   | 20.9       | CH <sub>3</sub> | 21, 24             | -         |
| 7'       | -          | -   | -                   | 86.2       | -               | -                  | -         |
| 8'       | -          | -   | -                   | 79.2       | -               | -                  | -         |
| 9'       | 2.04       | s   | -                   | 4.2        | CH <sub>3</sub> | 3', 4', 5', 7', 8' | -         |

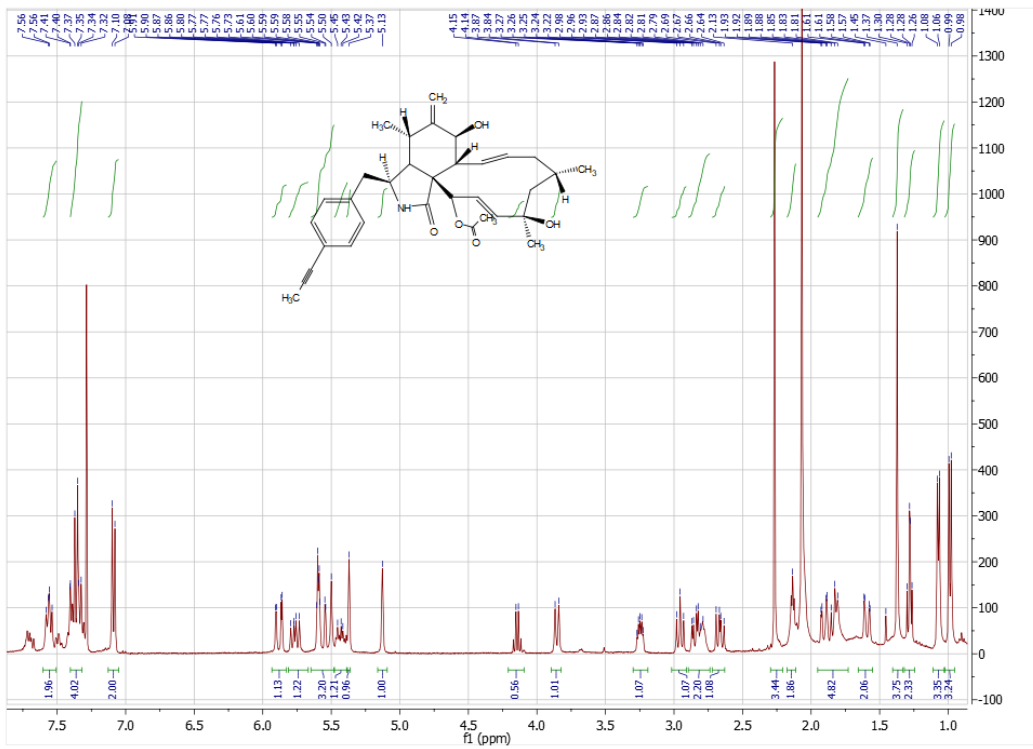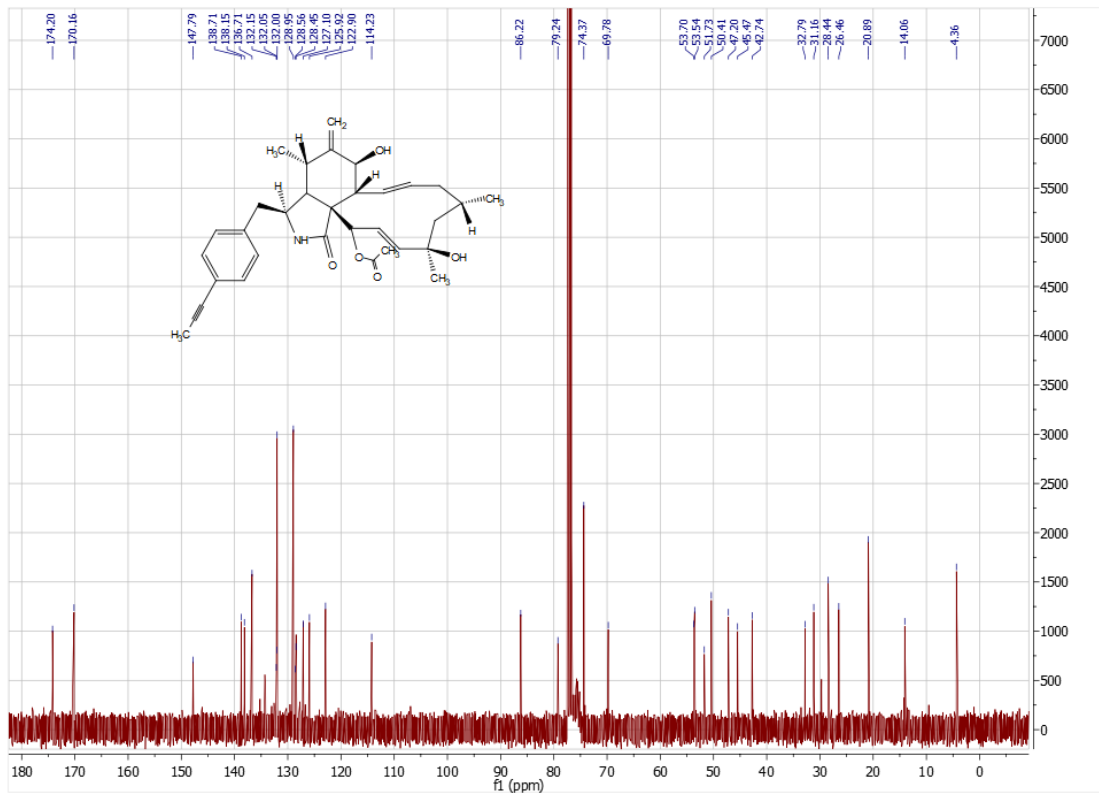

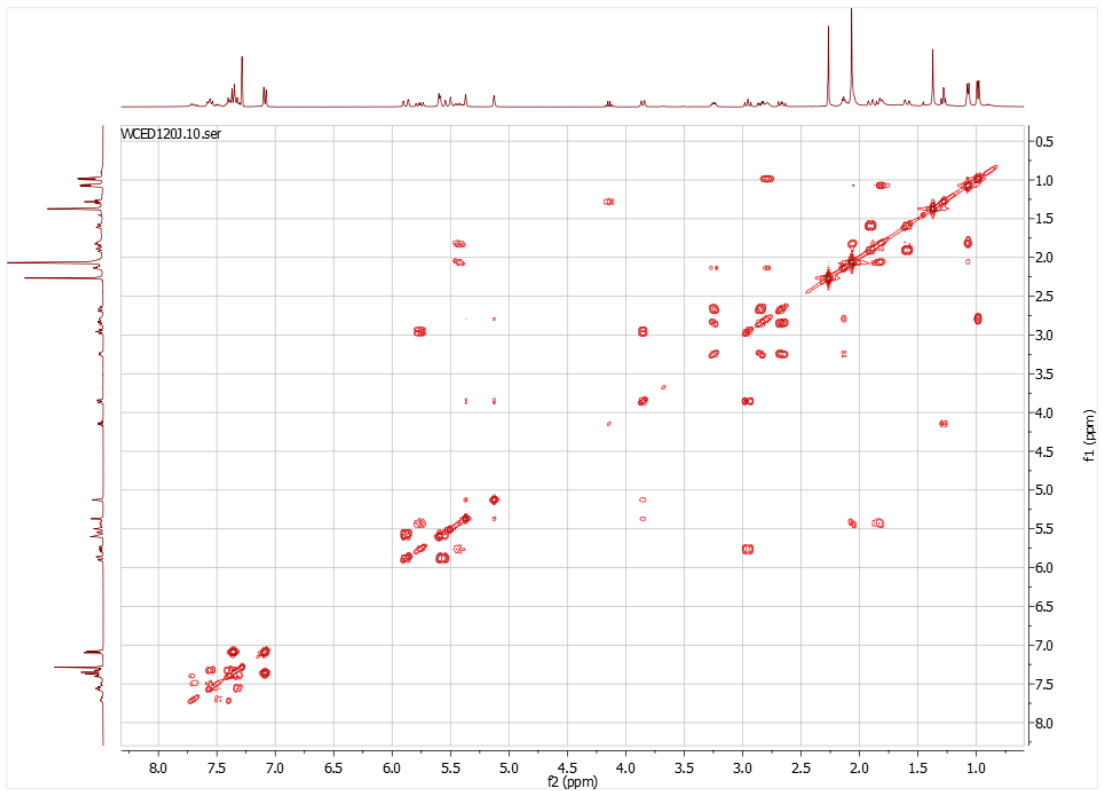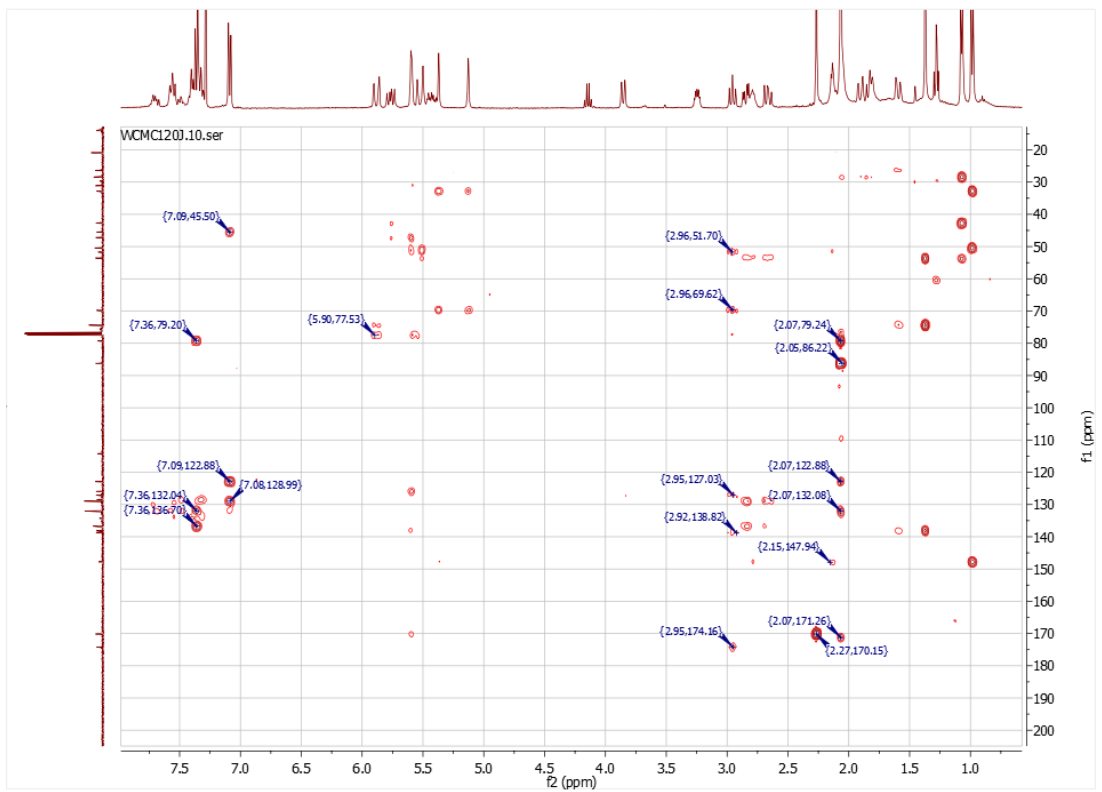

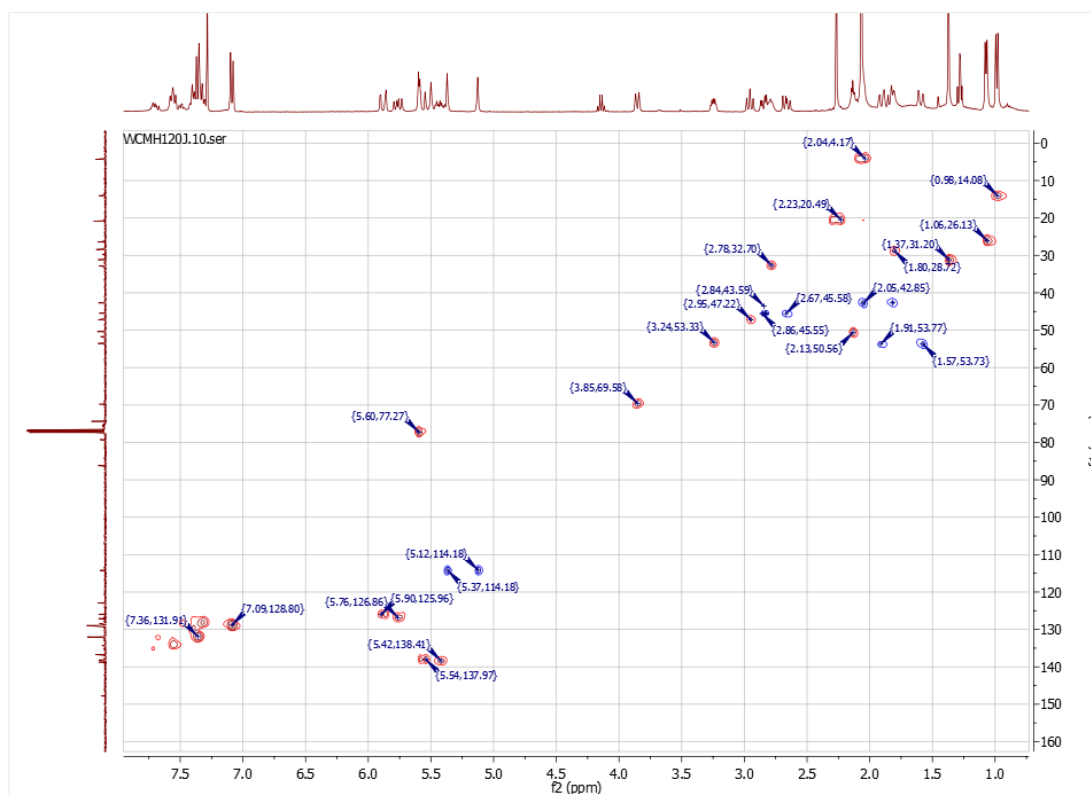

## 2.21 4'-Pinacolborolanyl Cytochalasin H 23

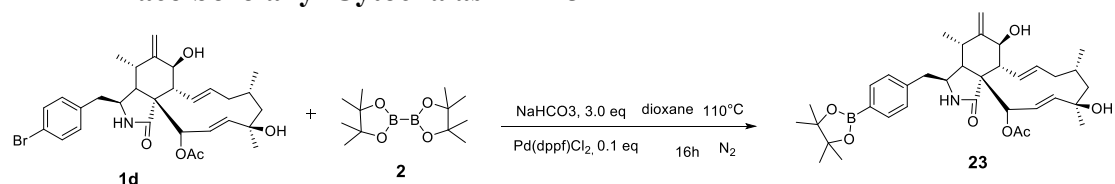

To a stirred solution of **1d** (20 mg, 0.035 mmol, 1.0 eq) and Bis(pinacolato)diboron **2** (17.8 mg, 0.07 mmol, 2.0 eq, purchased from Sigma-Aldrich) in dioxane (3 mL) was added Pd(dppf)Cl<sub>2</sub> (2.6 mg, 0.0035 mmol, 0.1 eq), NaHCO<sub>3</sub> (10.2 mg, 0.11 mmol, 3.0 eq). The mixture was stirred at 110 °C for 8 hours under nitrogen and the solvent was removed *in vacuo*. The residue was dissolved in EtOAc (2 mL) and washed with water (2 mL x 2). The organic phase was dried over MgSO<sub>4</sub>, filtered and evaporated to dryness *in vacuo*. The residue was dissolved in MeOH and purified by LCMS to afford 12.6 mg of desired product (58.3%, 0.020 mmol) as a white solid.

## 2.22 4'-4' Cytochalasin H dimer 24

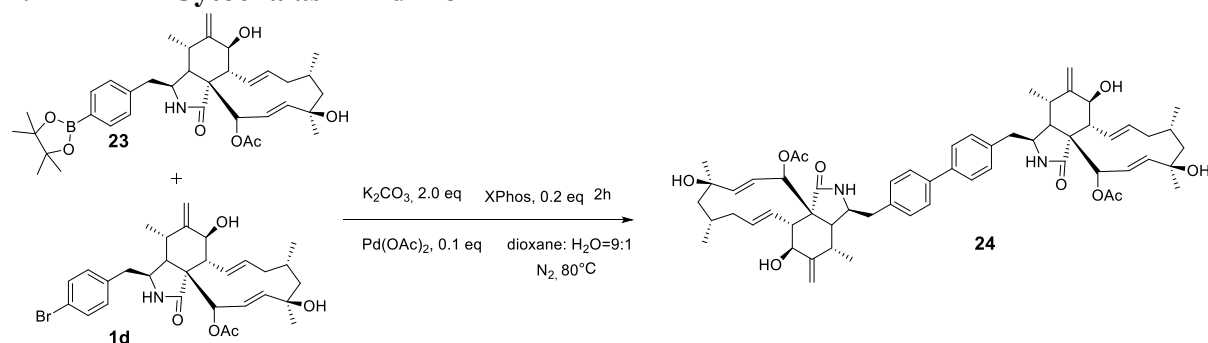

To a stirred solution of **1d** (7.6 mg, 0.012 mmol, 1.5 eq) and **23** (7 mg, 8 μmol, 1.0 eq) in dioxane (4 mL) was added Pd(OAc)<sub>2</sub> (0.12 mg, 0.8 μmol, 0.1 eq) and XPhos (0.76 mg, 1.6 μmol, 0.2 eq) and K<sub>2</sub>CO<sub>3</sub> (2.2 mg, 16 μmol, 2.0 eq). The mixture was stirred at 80 °C for 2 hours under nitrogen and the solvent was removed *in vacuo*. The residue was dissolved in EtOAc (4 mL) and washed with water (3 mL x 2). The organic phase was dried over MgSO<sub>4</sub>, filtered and evaporated to dryness *in vacuo*. The residue was dissolved in MeOH and purified by LCMS to afford 5.1 mg of desired product (42.6%, 0.005 mmol) as a white solid.



Monoisotopic Mass, Even Electron Ions

270 formula(e) evaluated with 17 results within limits (all results (up to 1000) for each mass)

Elements Used:

C: 0-65 H: 0-80 B: 0-2 N: 0-2 O: 0-10 Na: 0-1

Wang Q-ToF Premier UPLC-MS  
 WC 074C 295 (3.018) AM (Cen.4, 60.00, Ar,11000.0,556.28,0.55,LS 5); Sm (SG, 1x3.00)

09-Apr-2019 10:51:37  
 1: TOF MS ES+  
 1.08e3

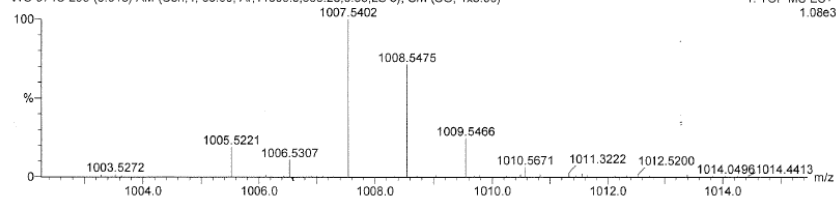

Minimum: -0.5  
 Maximum: 60.0

| Mass      | Calc. Mass | mDa   | PPM   | DBE  | i-FIT | Formula             |
|-----------|------------|-------|-------|------|-------|---------------------|
| 1007.5402 | 1007.5398  | 0.4   | 0.4   | 23.5 | 0.7   | C60 H76 N2 O10 Na   |
|           | 1007.5417  | -1.5  | -1.5  | 26.5 | 5.5   | C62 H74 B2 O9 Na    |
|           | 1007.5392  | 2.0   | 2.0   | 30.5 | 1.0   | C64 H72 B B2 O8     |
|           | 1007.5422  | -2.0  | -2.0  | 26.5 | 1.2   | C62 H75 N2 O10      |
|           | 1007.5438  | -3.6  | -3.6  | 27.5 | 2.6   | C65 H76 O8 Na       |
|           | 1007.5441  | -3.9  | -3.9  | 29.5 | 3.6   | C64 H73 B2 O9       |
|           | 1007.5358  | 4.4   | 4.4   | 27.5 | 1.6   | C62 H73 B B2 O8 Na  |
|           | 1007.5318  | 8.4   | 8.3   | 31.5 | 3.8   | C64 H70 B2 N2 O6 Na |
|           | 1007.5529  | -12.7 | -12.6 | 26.5 | 7.1   | C61 H74 B2 N2 O8 Na |
|           | 1007.5269  | 13.3  | 13.2  | 30.5 | 2.2   | C65 H72 B O9        |
|           | 1007.5550  | -14.8 | -14.7 | 27.5 | 3.0   | C64 H76 N2 O7 Na    |
|           | 1007.5553  | -15.1 | -15.0 | 29.5 | 5.3   | C63 H73 B2 N2 O8    |
|           | 1007.5245  | 15.7  | 15.6  | 27.5 | 2.8   | C63 H73 B O9 Na     |
|           | 1007.5569  | -16.7 | -16.6 | 22.5 | 4.9   | C59 H77 B B2 O10 Na |
|           | 1007.5593  | -19.1 | -19.0 | 25.5 | 3.8   | C61 H76 B B2 O10    |
|           | 1007.5210  | 19.2  | 19.1  | 31.5 | 5.6   | C65 H71 N2 O8       |
|           | 1007.5205  | 19.7  | 19.6  | 31.5 | 5.2   | C65 H70 B2 O7 Na    |

HRMS ( $m/z$ ): calculated for  $[C_{60}H_{76}N_2O_{10} + Na]$ : 1007.5398, found: 1007.5402.

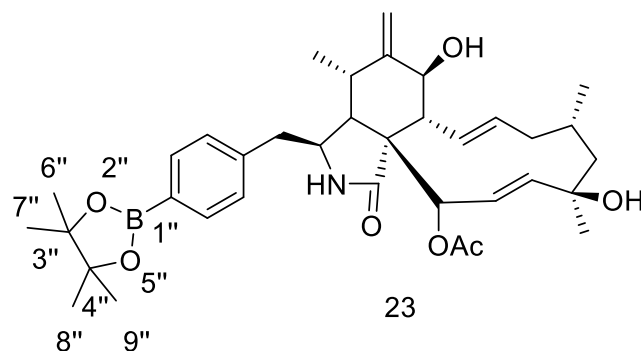

| Position     | $\delta_H$ | M   | $J_{H-H}/\text{Hz}$ | $\delta_C$ | HSQC               | HMBC H to C      | H-H COSY  |
|--------------|------------|-----|---------------------|------------|--------------------|------------------|-----------|
| 1            | -          | -   | -                   | 174.3      | -                  | -                | -         |
| 2            | -          | -   | -                   | -          | -                  | -                | -         |
| 3            | 3.27       | m   | -                   | 53.4       | CH                 | 1', 1, 4, 5      | 4, 5, 10  |
| 4            | 2.16       | m   | -                   | 50.2       | CH                 | 3, 5             | 3, 5, 10  |
| 5            | 2.80       | m   | -                   | 32.5       | CH                 | 1', 3            | 4, 11, 12 |
| 6            | -          | -   | -                   | 147.9      | -                  | -                | -         |
| 7            | 3.86       | d   | 10.9                | 69.5       | CH                 | 5, 6, 8, 12, 13  | 8, 12     |
| 8            | 2.96       | m   | -                   | 47.0       | CH                 | 7, 9, 13, 20, 21 | 7, 13     |
| 9            | -          | -   | -                   | 51.9       | -                  | -                | -         |
| 10a          | 2.70       | m   | -                   | 45.5       | CH <sub>2</sub>    | 1', 3            | 3, 4, 12  |
| 10b          | 2.90       | m   | -                   | -          | -                  | -                | -         |
| 11           | 1.00       | d   | 6.7                 | 13.8       | CH <sub>3</sub>    | 4, 5, 6          | 5         |
| 12a          | 5.13       | brs | -                   | 114.0      | CH <sub>2</sub>    | 5, 6, 7          | 5, 7, 11  |
| 12b          | 5.38       | brs | -                   | -          | -                  | -                | -         |
| 13           | 5.76       | m   | -                   | 126.9      | CH                 | 7, 8, 15         | 8, 14, 15 |
| 14           | 5.45       | m   | -                   | 138.4      | CH                 | 9, 15            | 13, 15    |
| 15a          | 1.82       | m   | -                   | 42.7       | CH <sub>2</sub>    | 13, 14, 16, 17   | 13, 14,   |
| 15b          | 2.05       | m   | -                   | -          | -                  | -                | -         |
| 16           | 1.83       | m   | -                   | 28.3       | CH                 | 13, 14, 17       | 22        |
| 17a          | 1.56       | brs | -                   | 53.7       | CH <sub>2</sub>    | 18, 19           | -         |
| 17b          | 1.90       | brs | -                   | -          | -                  | -                | -         |
| 18           | -          | -   | -                   | 74.3       | -                  | -                | -         |
| 19           | 5.54       | brs | -                   | 137.9      | CH                 | -                | 20        |
| 20           | 5.88       | dd  | 2.6, 16.5           | 125.7      | CH                 | 18, 19           | 19        |
| 21           | 5.51       | brs | -                   | 77.2       | CH                 | 8, 9, 19, 20, 23 | -         |
| 22           | 1.08       | d   | 6.3                 | 26.3       | CH <sub>3</sub>    | 15, 16, 17       | 16        |
| 23           | 1.38       | s   | -                   | 31.0       | CH <sub>3</sub>    | 17, 18, 19       | -         |
| 1'           | -          | -   | -                   | 128.6      | -                  | -                | -         |
| 2' 6'        | 7.19       | d   | 7.9                 | 128.1      | 2 x CH             | 3', 4', 5', 10   | 3', 5'    |
| 3' 5'        | 7.78       | d   | 7.9                 | 134.9      | 2 x CH             | 1', 4'           | 2', 6'    |
| 4'           | -          | -   | -                   | 128.9      | -                  | -                | -         |
| 24           | -          | -   | -                   | 170.1      | -                  | -                | -         |
| 25           | 2.27       | s   | -                   | 20.8       | CH <sub>3</sub>    | 24               | -         |
| 3''4''       | -          | -   | -                   | 83.9       | -                  | -                | -         |
| 6''7''8''9'' | 1.37       | brs | -                   | 24.7       | 4x CH <sub>3</sub> | 3'', 4''         | -         |

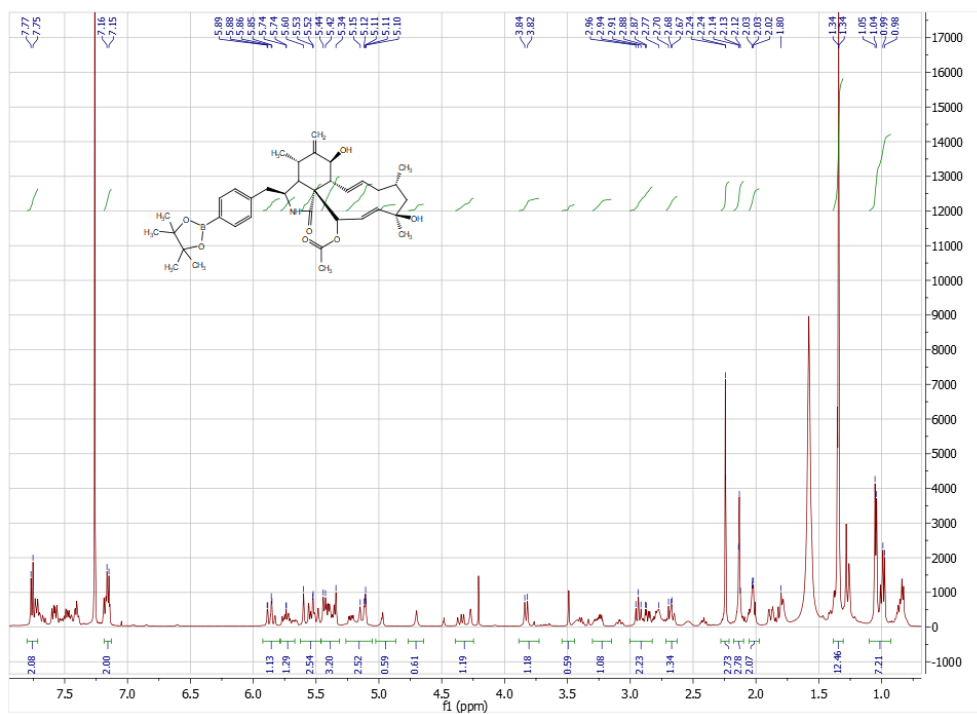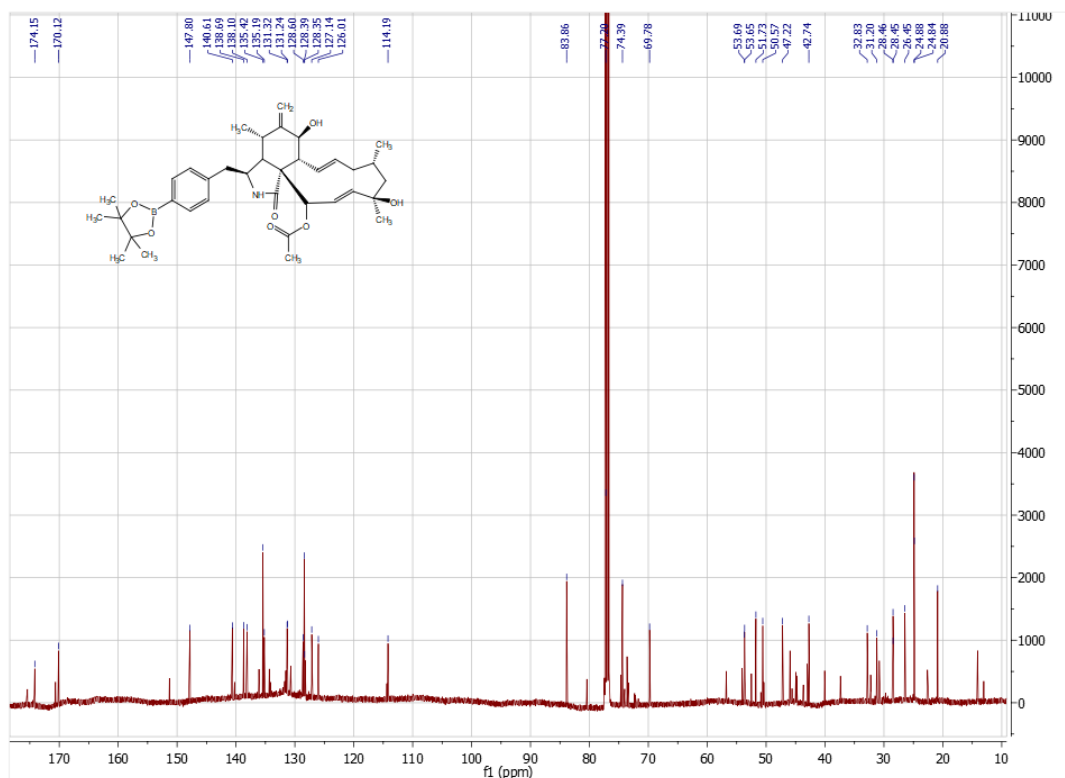



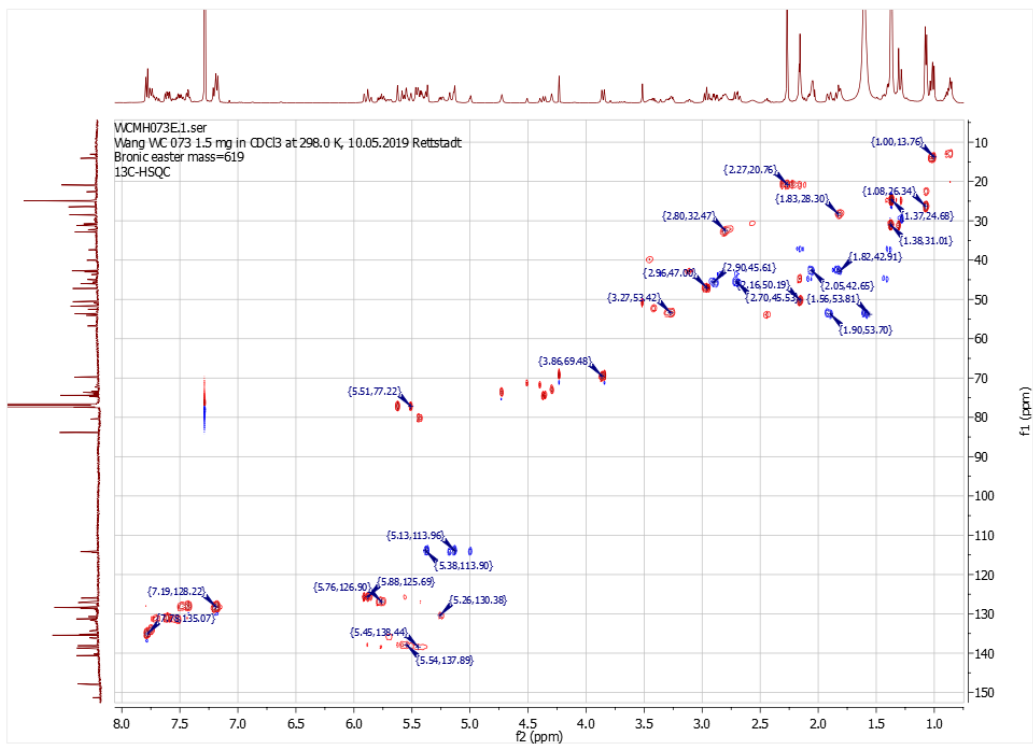

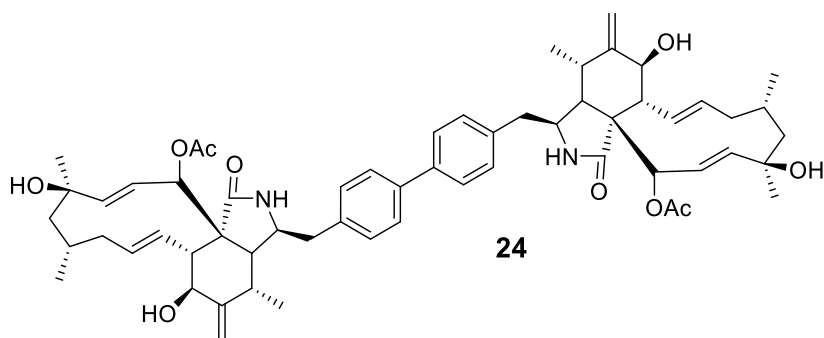

Chemical Formula: C<sub>60</sub>H<sub>76</sub>N<sub>2</sub>O<sub>10</sub>  
Exact Mass: 984.5500

| Position | $\delta_H$ | M   | $J_{H-H}/\text{Hz}$ | $\delta_C$ | HSQC            | HMBC H to C     | H-H COSY  |
|----------|------------|-----|---------------------|------------|-----------------|-----------------|-----------|
| 1        | -          | -   | -                   | 174.3      | -               | -               | -         |
| 2        | 5.48       | brs | -                   | -          | -               | -               | 3         |
| 3        | 3.29       | ddd | 0.9, 9.6, 4.6       | 53.4       | CH              | -               | 2         |
| 4        | 2.16       | dd  | 4.6, 8.9            | 50.3       | CH              | 9, 21           | 5         |
| 5        | 2.81       | m   | -                   | 32.5       | CH              | -               | 4, 11, 12 |
| 6        | -          | -   | -                   | 148.1      | -               | -               | -         |
| 7        | 3.83       | d   | 10.8                | 69.3       | CH              | 6, 12, 13       | 8, 12     |
| 8        | 2.95       | dd  | 10.2, 10.8          | 46.9       | CH              | 1, 3, 7, 13, 14 | 7, 13     |
| 9        | -          | -   | -                   | 51.7       | -               | -               | -         |
| 10a      | 2.68       | dd  | 13.5, 9.9           | 44.9       | CH <sub>2</sub> | 1', 2', 6', 3   | -         |
| 10b      | 2.92       | dd  | 13.5, 4.4           | -          | -               | -               | -         |
| 11       | 1.05       | d   | 6.5                 | 13.9       | CH <sub>3</sub> | 4, 5, 6         | 5         |
| 12a      | 5.13       | brs | -                   | 113.8      | CH <sub>2</sub> | 5, 6, 7         | 5, 7      |
| 12b      | 5.37       | brs | -                   | -          | -               | -               | -         |
| 13       | 5.75       | ddd | 9.7, 15.5, 1.3      | 126.7      | CH              | 8, 9            | 8, 14     |
| 14       | 5.41       | ddd | 15.5, 4.7, 10.0     | 138.4      | CH              | -               | 13, 15    |
| 15a      | 1.80       | m   | -                   | 42.5       | CH <sub>2</sub> | 13, 14, 16      | 14, 17    |
| 15b      | 2.04       | m   | -                   | -          | -               | -               | -         |
| 16       | 1.79       | m   | -                   | 28.2       | CH              | -               | 17        |
| 17a      | 1.56       | m   | -                   | 53.5       | CH <sub>2</sub> | 18, 19          | 15, 16    |
| 17b      | 1.88       | dd  | 3.0, 14.4           | -          | -               | -               | -         |
| 18       | -          | -   | -                   | 74.6       | -               | -               | -         |
| 19       | 5.57       | dd  | 16.6, 2.4           | 137.8      | CH              | 8, 9, 20        | 20        |
| 20       | 5.89       | dd  | 16.6, 2.7           | 125.6      | CH              | 18, 21          | 21        |
| 21       | 5.58       | dd  | 2.5, 2.7            | 77.1       | CH              | 19, 20          | 20        |
| 22       | 1.05       | d   | 6.5                 | 26.2       | CH <sub>3</sub> | 15, 16, 17      | 15        |
| 23       | 1.37       | s   | -                   | 30.8       | CH <sub>3</sub> | 16, 17, 18, 19  | -         |
| 1'       | -          | -   | -                   | 129.7      | -               | -               | -         |
| 2' 6'    | 7.22       | d   | 8.1                 | 129.1      | 2 x CH          | 3', 4', 5', 10  | 3', 5'    |
| 3' 5'    | 7.51       | d   | 8.1                 | 127.1      | 2 x CH          | 2', 6', 4'      | 2', 6'    |
| 4'       | -          | -   | -                   | 139.6      | -               | -               | -         |
| 24       | -          | -   | -                   | 170.3      | -               | -               | -         |
| 25       | 2.26       | s   | -                   | 20.6       | CH <sub>3</sub> | 24              | -         |

NMR data of **24** recorded at 500 MHz in CDCl<sub>3</sub>.

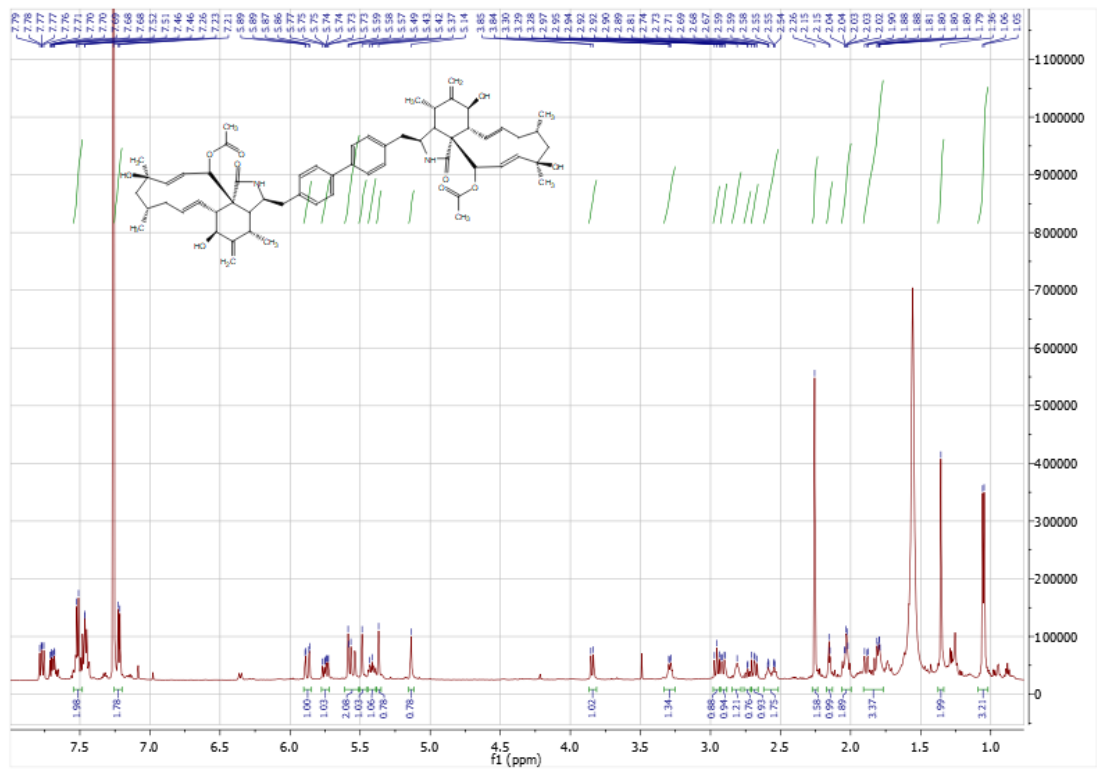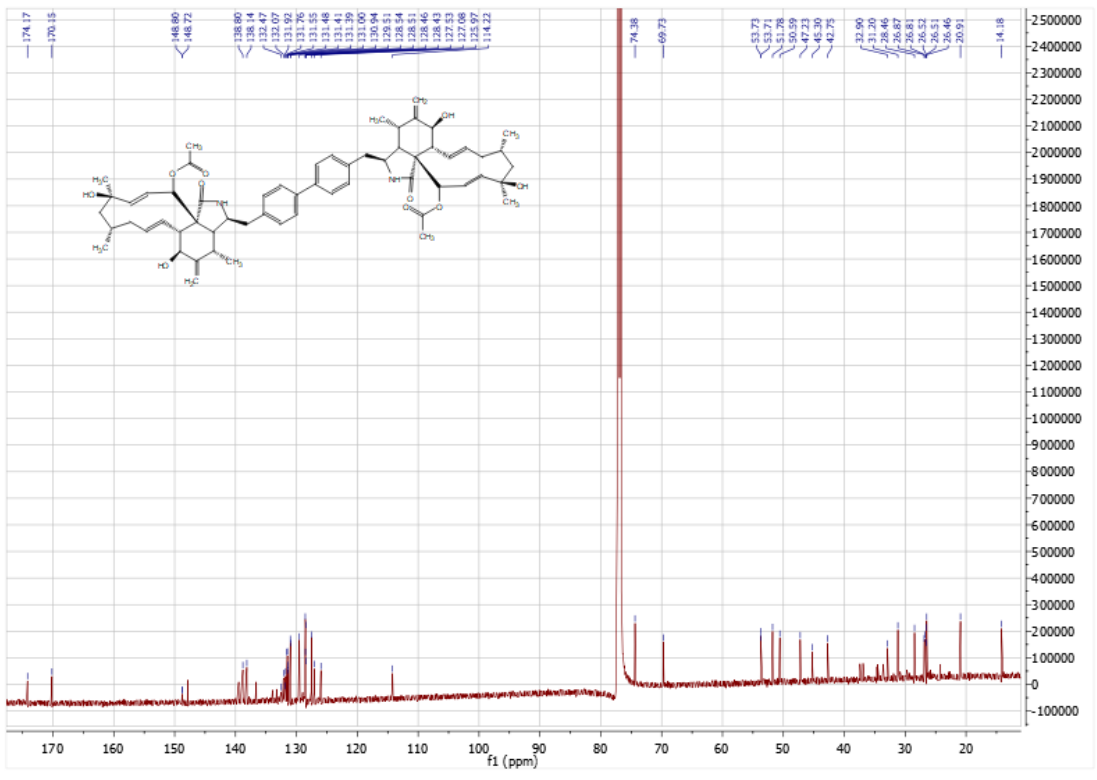

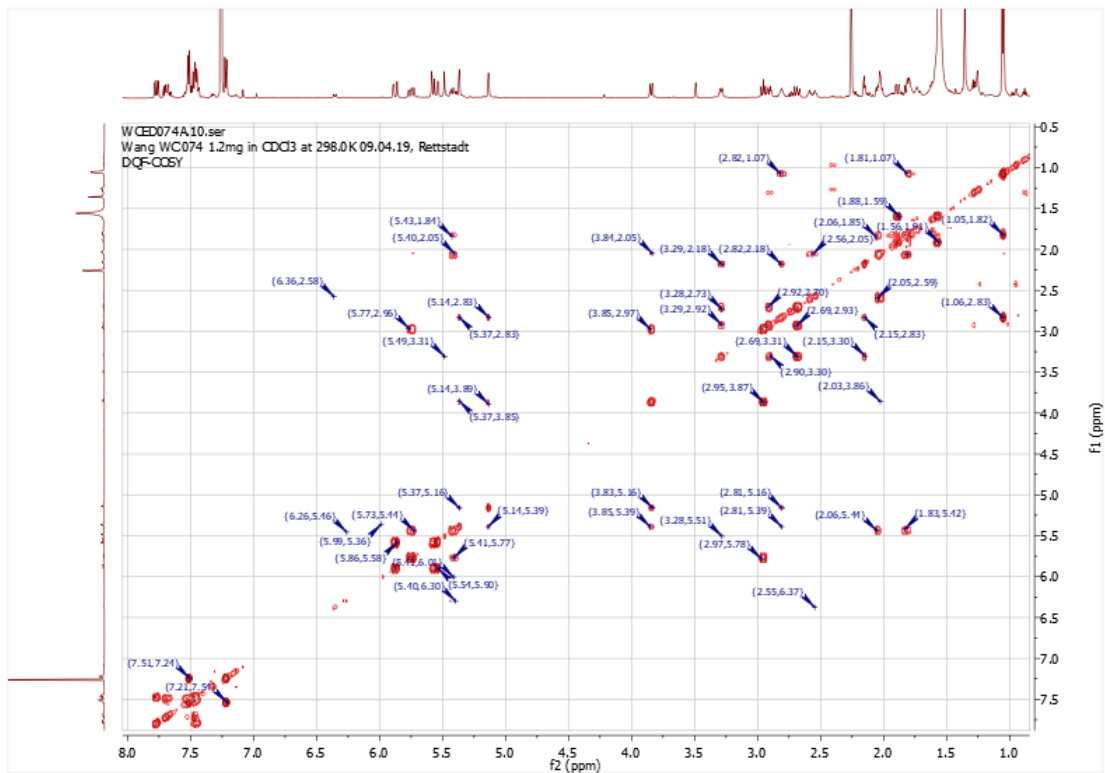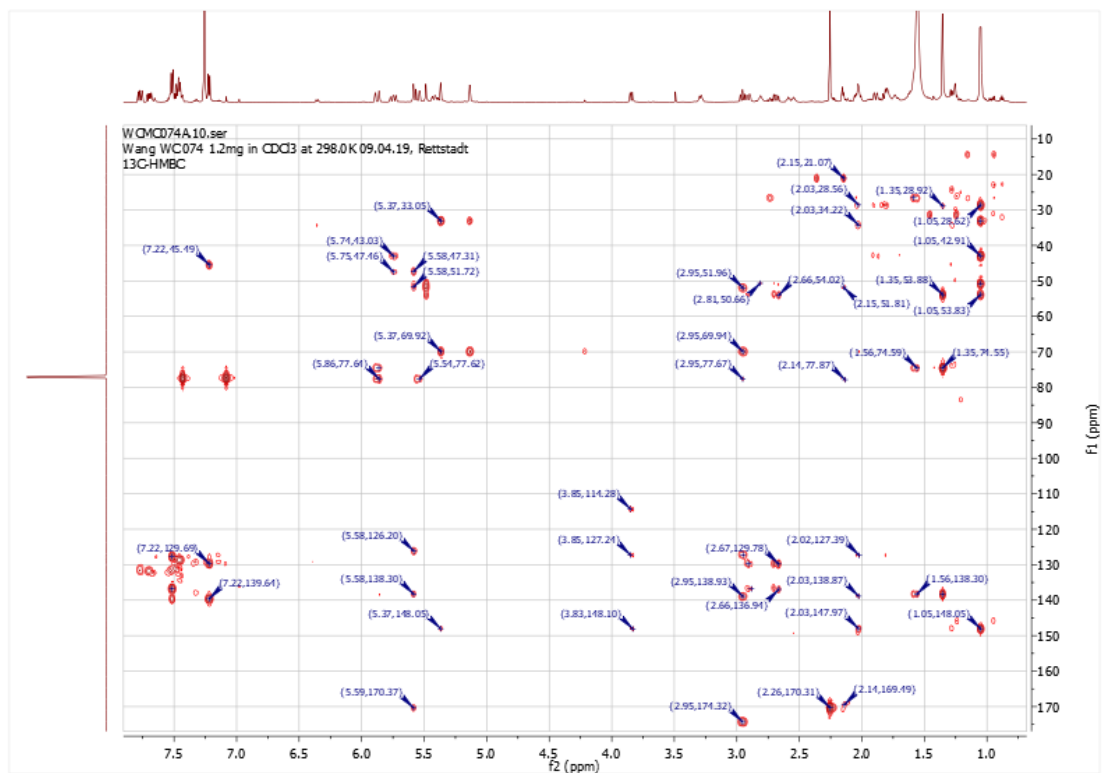



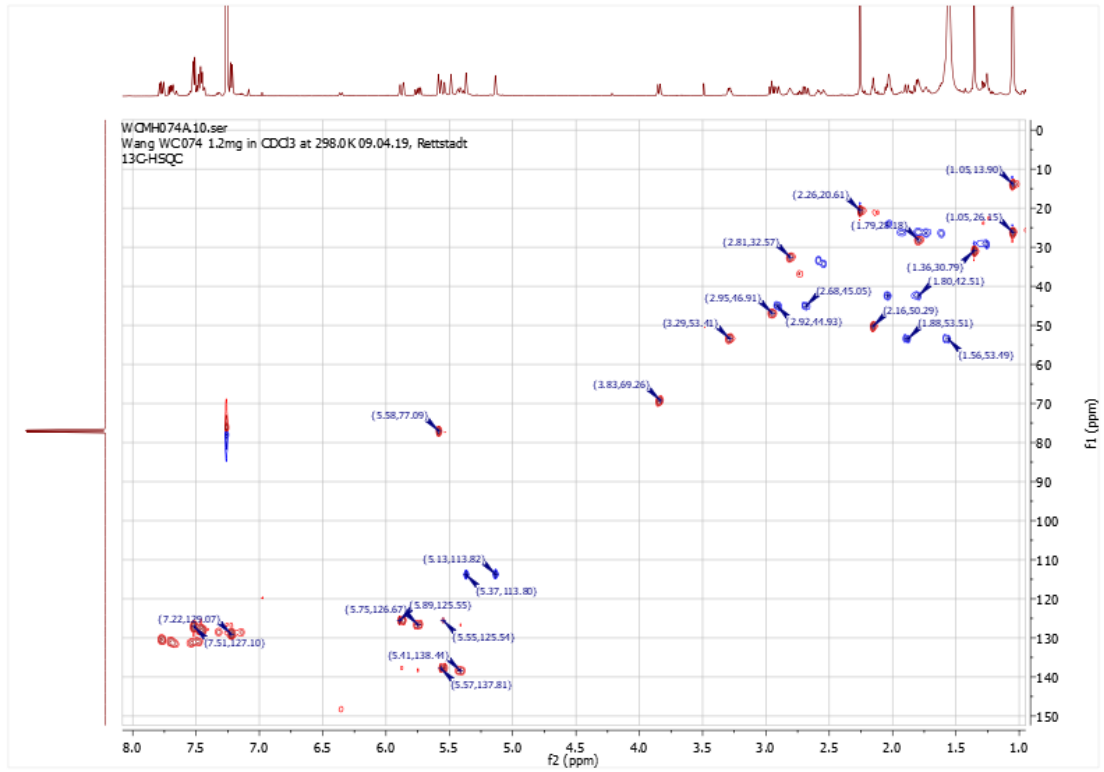

## 2.23 Cytochalasin H Dimer 25

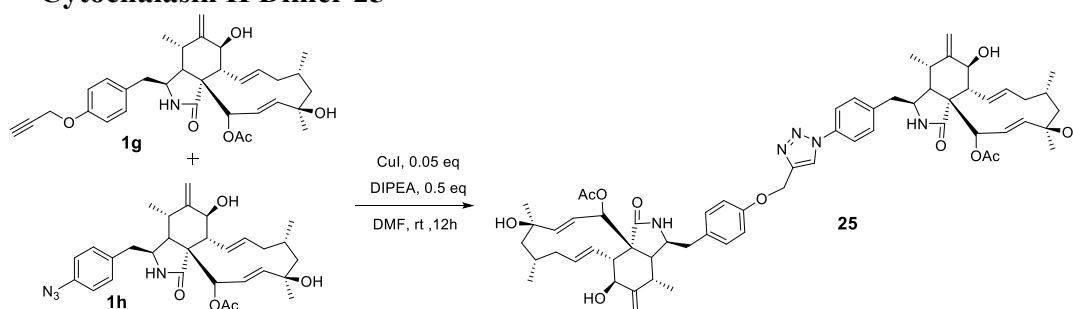

To a stirred solution of **1h** (11.0 mg, 0.021 mmol, 1.1 eq) and **1g** (10.0 mg, 0.019 mmol, 1.0 eq) in DMF (2 mL) was added CuI (0.2 mg, 0.95  $\mu$ mol, 0.05 eq) and DIPEA (1.2 mg, 9.5  $\mu$ mol, 0.5 eq). The mixture was stirred at room temperature for 12 hours under nitrogen and the solvent was removed *in vacuo*. The residue was dissolved in EtOAc (2mL) and washed with water (2 mL x 2). The organic phase was dried over MgSO<sub>4</sub>, filtered and evaporated to dryness *in vacuo*. The residue was dissolved in MeOH and purified by LCMS to afford 16.5 mg of desired product (81.5%, 0.015 mmol) as a white solid.

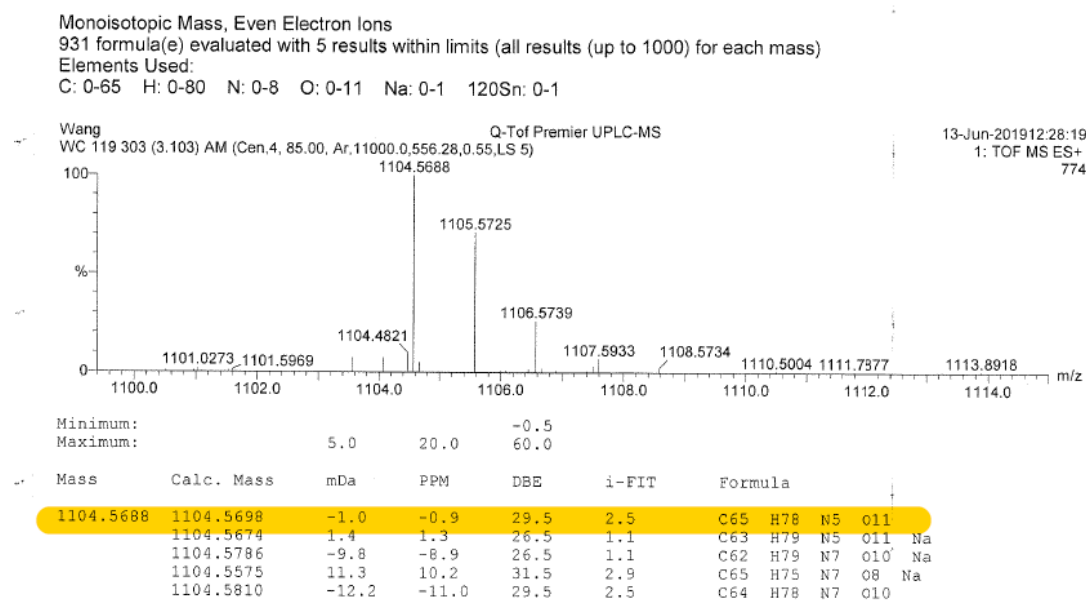

HRMS (*m/z*): calculated for [C<sub>60</sub>H<sub>76</sub>N<sub>2</sub>O<sub>10</sub> + Na]: 1104.5674, found: 1104.5688.

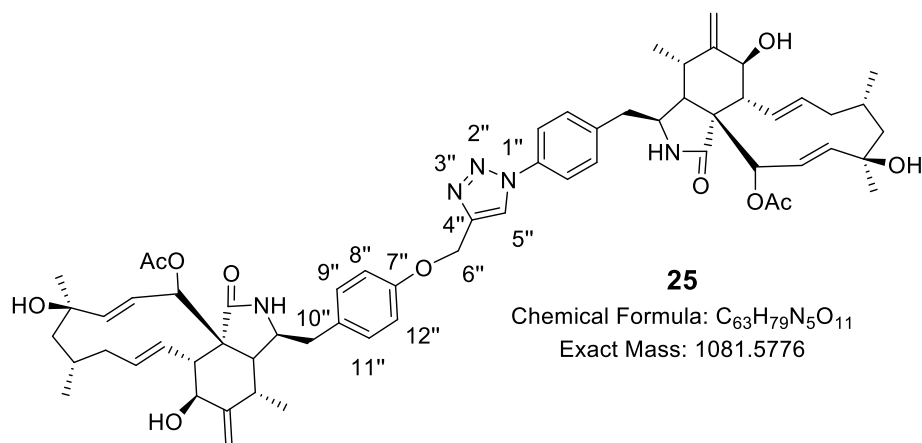

| Position | $\delta_H$ | M   | $J_{H-H}/\text{Hz}$ | $\delta_C$ | HSQC            | HMBC H to C      | H-H COSY  |
|----------|------------|-----|---------------------|------------|-----------------|------------------|-----------|
| 1        | -          | -   | -                   | 174.3      | -               | -                | -         |
| 3        | 3.25       | m   | -                   | 53.8       | CH              | 1', 1, 4, 5      | 4, 5, 10  |
| 4        | 2.16       | dd  | 3.9, 5.1            | 50.4       | CH              | 1, 3, 5, 6, 10   | 3, 5, 10  |
| 5        | 2.80       | m   | -                   | 32.8       | CH              | 1', 3            | 4, 11, 12 |
| 6        | -          | -   | -                   | 147.9      | -               | -                | -         |
| 7        | 3.86       | dd  | 2.2, 11.8           | 69.6       | CH              | 6, 12            | 8, 12     |
| 8        | 2.96       | m   | -                   | 47.3       | CH              | 7, 9, 13, 20, 21 | 7, 13     |
| 9        | -          | -   | -                   | 51.8       | -               | -                | -         |
| 10a      | 2.79       | m   | -                   | 44.9       | CH <sub>2</sub> | 1', 3            | 3, 4, 12  |
| 10b      | 2.96       | m   | -                   | -          | -               | -                | -         |
| 11       | 1.01       | d   | 6.6                 | 14.2       | CH <sub>3</sub> | 4, 5, 6          | 5         |
| 12a      | 5.14       | brs | -                   | 114.2      | CH <sub>2</sub> | 5, 6, 7          | 5, 7, 11  |
| 12b      | 5.38       | brs | -                   | -          | -               | -                | -         |
| 13       | 5.75       | m   | -                   | 127.9      | CH              | 7, 8, 15         | 8, 14, 15 |
| 14       | 5.42       | m   | -                   | 138.8      | CH              | 9, 15            | 13, 15    |
| 15a      | 1.82       | m   | -                   | 42.7       | CH <sub>2</sub> | 13, 14, 16, 17   | 13, 14,   |
| 15b      | 2.05       | m   | -                   | -          | -               | -                | -         |
| 16       | 1.81       | m   | -                   | 28.6       | CH              | 13, 14, 17       | 22        |
| 17a      | 1.58       | m   | -                   | 53.7       | CH <sub>2</sub> | 18, 19           | -         |
| 17b      | 1.91       | m   | -                   | -          | -               | -                | -         |
| 18       | -          | -   | -                   | 74.7       | -               | -                | -         |
| 19       | 5.56       | brs | -                   | 138.2      | CH              | -                | 20        |
| 20       | 5.86       | m   | -                   | 125.8      | CH              | 18, 19           | 19        |
| 21       | 5.52       | brs | -                   | 77.5       | CH              | 8, 9, 19, 20, 23 | -         |
| 22       | 1.07       | d   | 6.4                 | 26.5       | CH <sub>3</sub> | 15, 16, 17       | 16        |
| 23       | 1.36       | s   | -                   | 31.3       | CH <sub>3</sub> | 17, 18, 19       | -         |
| 1'       | -          | -   | -                   | 138.3      | -               | -                | -         |
| 2' 6'    | 7.34       | d   | 8.5                 | 130.4      | 2 x CH          | 3', 4', 5', 10   | 3', 5'    |
| 3' 5'    | 7.71       | d   | 8.5                 | 121.0      | 2 x CH          | 1', 4'           | 2', 6'    |
| 4'       | -          | -   | -                   | 136.0      | -               | -                | -         |
| 24       | -          | -   | -                   | 170.2      | -               | -                | -         |
| 25       | 2.26       | s   | -                   | 21.0       | CH <sub>3</sub> | 24               | -         |
| 4''      | -          | -   | -                   | 145.0      | -               | -                | -         |
| 5''      | 8.08       | s   | -                   | 120.5      | CH              | 4''              | -         |
| 6''      | 5.30       | s   | -                   | 62.0       | CH <sub>2</sub> | 4'', 5'', 7''    | -         |
| 7''      | -          | -   | -                   | 157.3      | CH <sub>2</sub> | 6'', 8'', 17''   | -         |
| 8''12''  | 7.00       | d   | 8.6                 | 115.2      | 2 x CH          | 7'', 9'', 11''   | 9'', 11'' |
| 9'' 11'' | 7.10       | d   | 8.6                 | 130.2      | 2 x CH          | 8'', 10''        | 8'', 12'' |
| 10''     | -          | -   | -                   | 138.3      | -               | -                | -         |

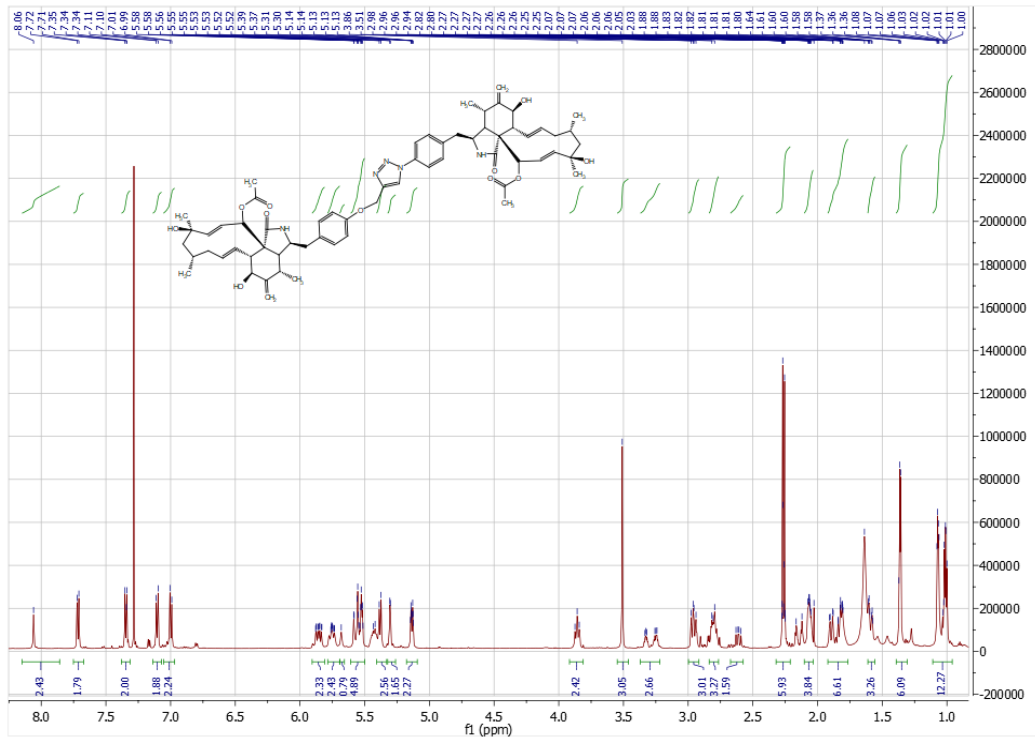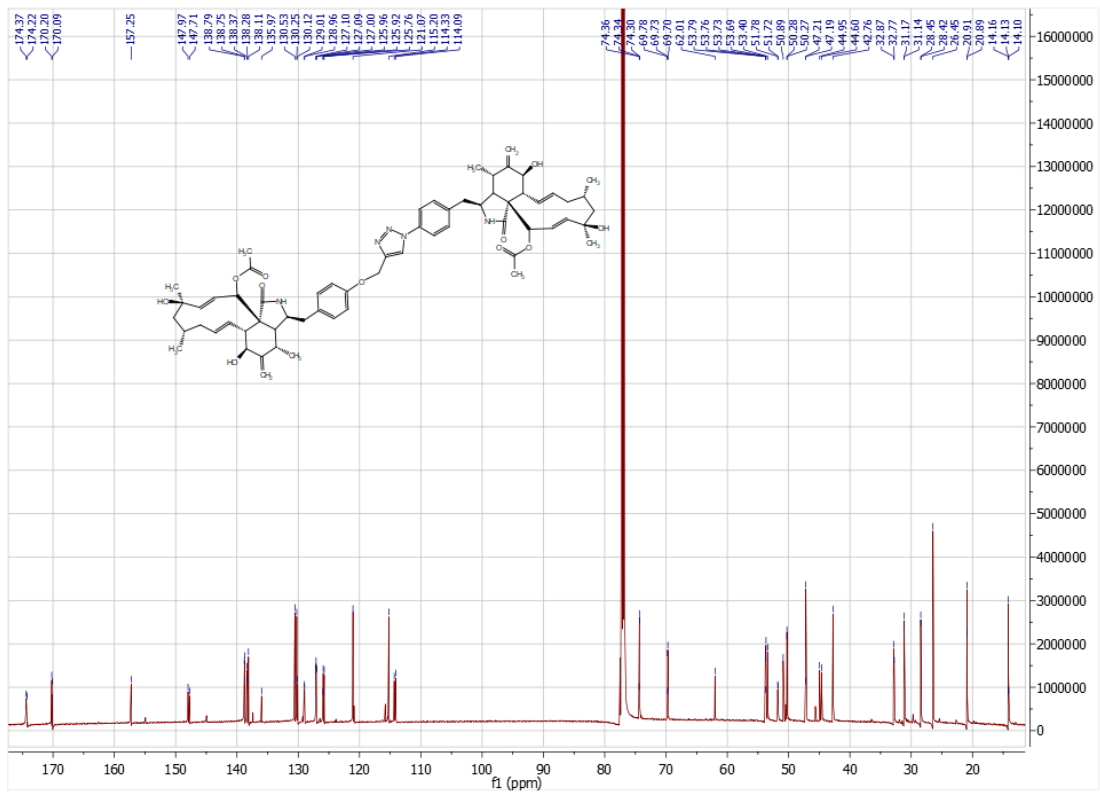

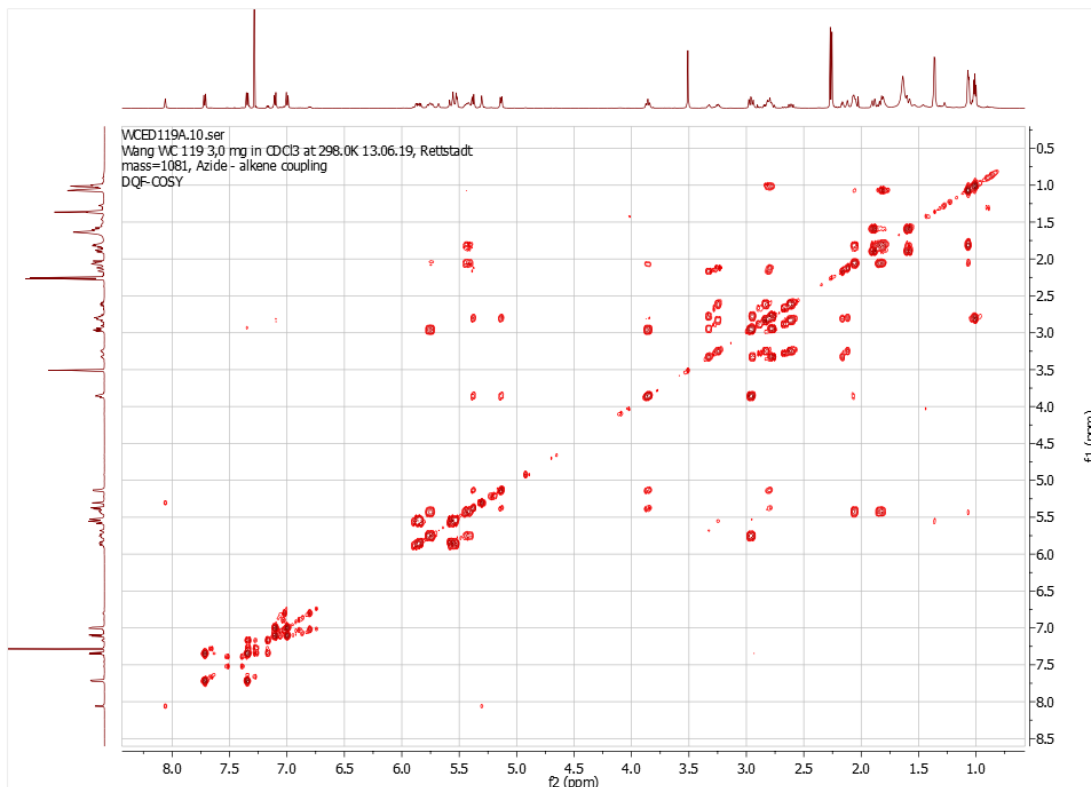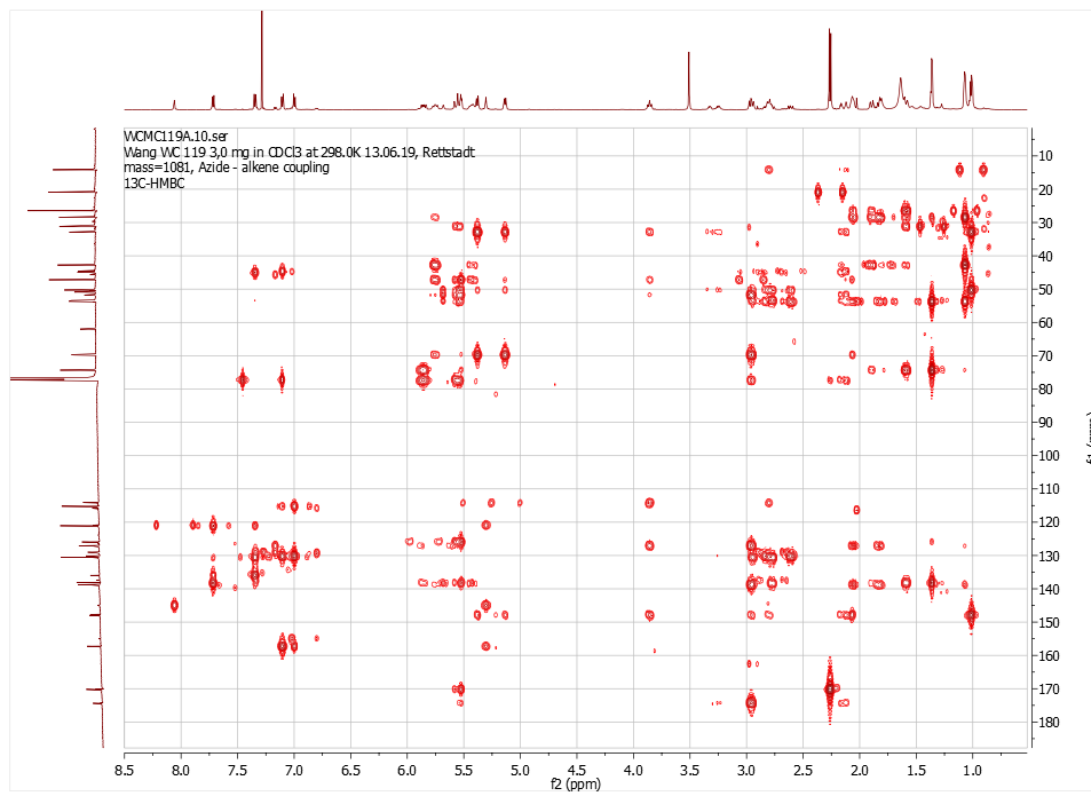

## 2.24 Bis acetylene linker 26

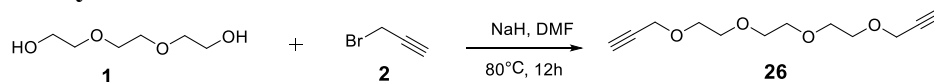

To a stirred solution of **PEG** (100 mg, 0.67 mmol, 1.0 eq, purchased from Sigma-Aldrich) in dry DMF (3 mL) was added sodium hydride (32.2 mg, 1.34 mmol, 2.0 eq). The mixture was stirred at room temperature for 1 hour under nitrogen after which propargyl bromide (0.6 mL, 6.7 mmol, 10.0 eq, purchased from Acros) was added. The reaction solution was stirred at 80 °C for 12 hours under nitrogen and the solvent was removed *in vacuo*. The residue was diluted with water (10 mL) and then neutralized with 0.1 M HCl (15 mL). The resulting mixture was extracted with EtOAc (15 mL × 2) and the extract was washed with brine (20 mL). The organic phase was dried over MgSO<sub>4</sub>, filtered and evaporated to dryness *in vacuo*. The crude light yellow oil (100 mg) was directly used in the next step without further purification.

## 2.25 Dimeric Cytochalasin H 27

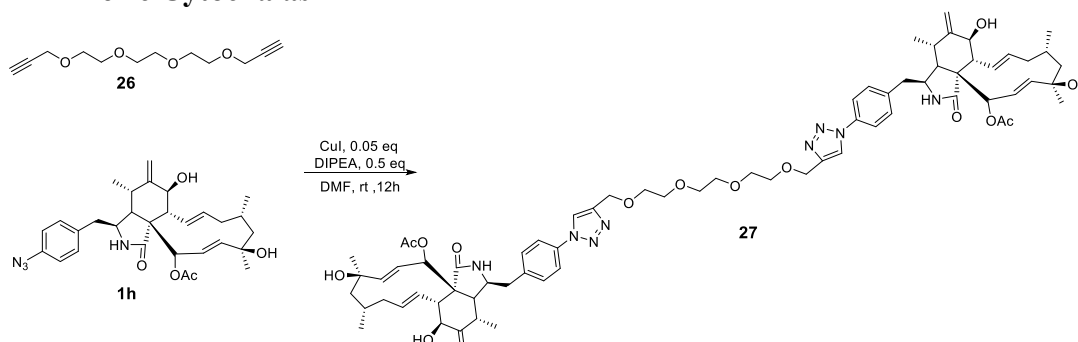

To a stirred solution of **1h** (20 mg, 0.038 mmol, 1.0 eq) and **26** (25.8 mg, 0.114 mmol, 3.0 eq) in DMF (4 mL) was added CuI (0.4 mg, 1.90 μmol, 0.05 eq) and DIPEA (2.4 mg, 19.0 μmol, 0.5 eq). The mixture was stirred at room temperature for 12 hours under nitrogen and the solvent was removed *in vacuo*. The residue was dissolved in EtOAc (2 mL) and washed with water (3 mL × 2). The organic phase was dried over MgSO<sub>4</sub>, filtered and evaporated to dryness *in vacuo*. The residue was dissolved in MeOH and purified by LCMS to afford 15.4 mg of desired product (31.7%, 0.012 mmol) as a brown solid.

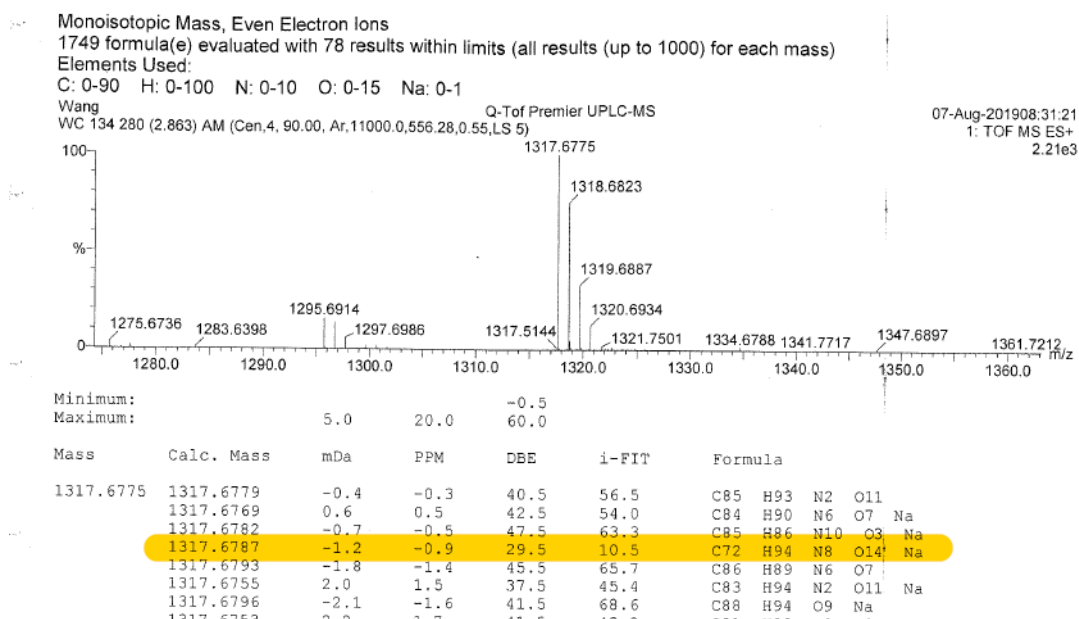

HRMS ( $m/z$ ): calculated for  $[C_{872}H_{94}N_8O_{14} + Na]$ : 1317.6787, found: 1317.6775.

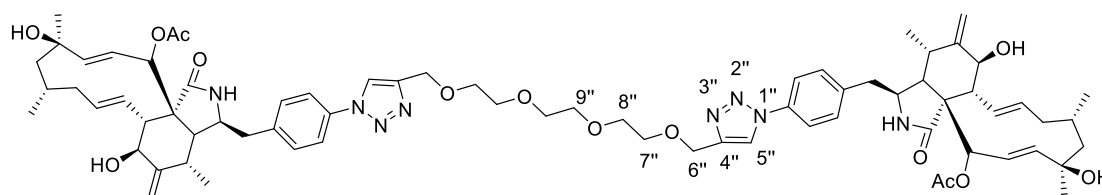

27

Chemical Formula:  $C_{72}H_{94}N_8O_{14}$

Exact Mass: 1294.6889

| Position | $\delta_H$ | M   | $J_{H-H}/Hz$    | $\delta_C$ | HSQC            | HMBC H to C      | H-H COSY  |
|----------|------------|-----|-----------------|------------|-----------------|------------------|-----------|
| 1        | -          | -   | -               | 174.3      | -               | -                | -         |
| 3        | 3.33       | m   | -               | 53.5       | CH              | 1', 1, 4, 5      | 4, 5, 10  |
| 4        | 2.16       | dd  | 3.8, 5.1        | 50.3       | CH              | 1, 3, 5, 6, 10   | 3, 5, 10  |
| 5        | 2.81       | m   | -               | 32.8       | CH              | 1', 3            | 4, 11, 12 |
| 6        | -          | -   | -               | 147.9      | -               | -                | -         |
| 7        | 3.88       | dd  | 1.3, 10.8       | 69.9       | CH              | 6, 12            | 8, 12     |
| 8        | 2.96       | m   | -               | 47.3       | CH              | 7, 9, 13, 20, 21 | 7, 13     |
| 9        | -          | -   | -               | 51.8       | -               | -                | -         |
| 10a      | 2.76       | m   | -               | 45.1       | CH <sub>2</sub> | 1', 3            | 3, 4, 12  |
| 10b      | 2.93       | m   | -               | -          | -               | -                | -         |
| 11       | 1.02       | d   | 6.7             | 14.2       | CH <sub>3</sub> | 4, 5, 6          | 5         |
| 12a      | 5.14       | brs | -               | 114.2      | CH <sub>2</sub> | 5, 6, 7          | 5, 7, 11  |
| 12b      | 5.39       | brs | -               | -          | -               | -                | -         |
| 13       | 5.75       | ddd | 1.4, 9.7, 15.4  | 126.9      | CH              | 7, 8, 15         | 8, 14, 15 |
| 14       | 5.42       | ddd | 4.8, 10.1, 15.4 | 138.8      | CH              | 9, 15            | 13, 15    |
| 15a      | 1.82       | m   | -               | 42.7       | CH <sub>2</sub> | 13, 14, 16, 17   | 13, 14,   |
| 15b      | 2.06       | m   | -               | -          | -               | -                | -         |
| 16       | 1.81       | m   | -               | 28.6       | CH              | 13, 14, 17       | 22        |
| 17a      | 1.60       | m   | -               | 53.6       | CH <sub>2</sub> | 18, 19           | -         |
| 17b      | 1.88       | m   | -               | -          | -               | -                | -         |
| 18       | -          | -   | -               | 74.7       | -               | -                | -         |
| 19       | 5.56       | brs | -               | 138.2      | CH              | -                | 20        |
| 20       | 5.88       | dd  | 2.2, 17.0       | 125.7      | CH              | 18, 19           | 19        |
| 21       | 5.55       | brs | -               | 77.3       | CH              | 8, 9, 19, 20, 23 | -         |
| 22       | 1.07       | d   | 6.3             | 26.5       | CH <sub>3</sub> | 15, 16, 17       | 16        |
| 23       | 1.36       | s   | -               | 31.3       | CH <sub>3</sub> | 17, 18, 19       | -         |
| 1'       | -          | -   | -               | 138.3      | -               | -                | -         |
| 2' 6'    | 7.31       | d   | 8.5             | 130.4      | 2 x CH          | 3', 4', 5', 10   | 3', 5'    |
| 3' 5'    | 7.68       | d   | 8.5             | 120.8      | 2 x CH          | 1', 4'           | 2', 6'    |
| 4'       | -          | -   | -               | 136.0      | -               | -                | -         |
| 24       | -          | -   | -               | 170.2      | -               | -                | -         |
| 25       | 2.27       | s   | -               | 21.0       | CH <sub>3</sub> | 24               | -         |
| 4''      | -          | -   | -               | 145.0      | -               | -                | -         |
| 5''      | 8.04       | s   | -               | 120.4      | CH              | 4''              | -         |
| 6''      | 4.77       | s   | -               | 64.7       | CH <sub>2</sub> | 4'', 5'', 7''    | -         |
| 7''      | 3.76       | m   | -               | 69.9       | CH <sub>2</sub> | 6'', 8'', 17''   | -         |
| 8''9''   | 3.70       | m   | -               | 70.6       | CH <sub>2</sub> | 8'', 9''         | -         |

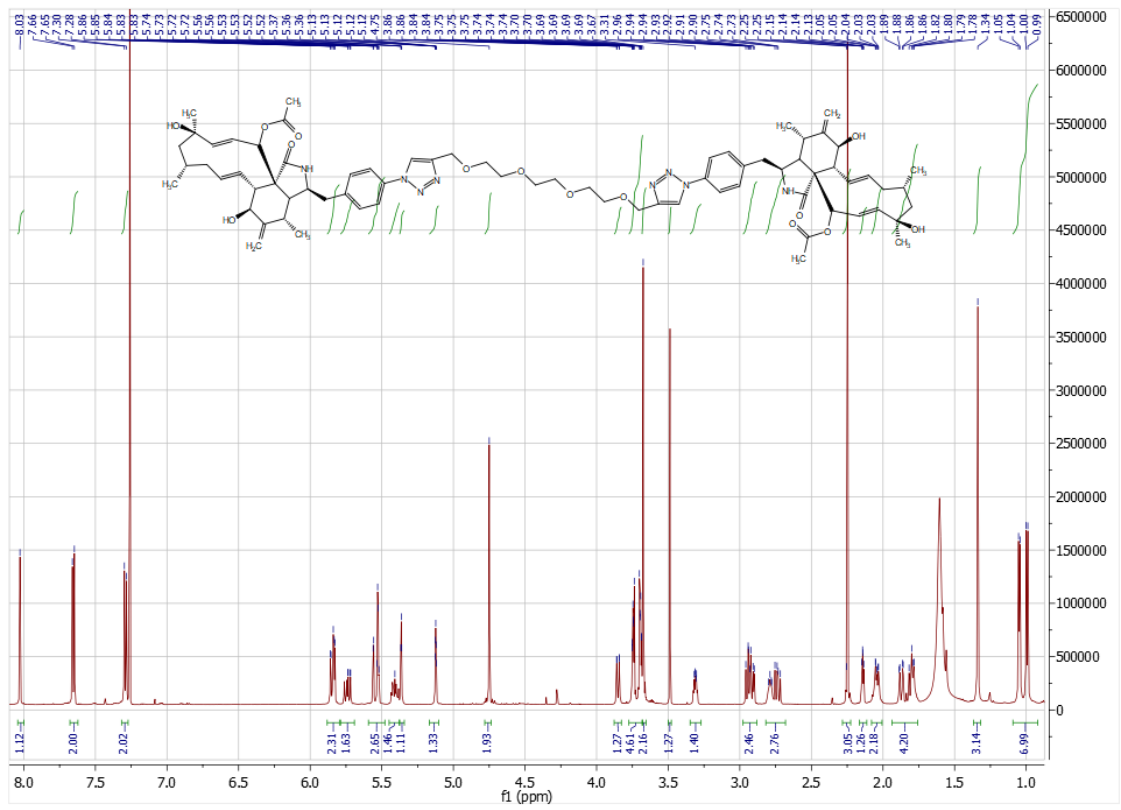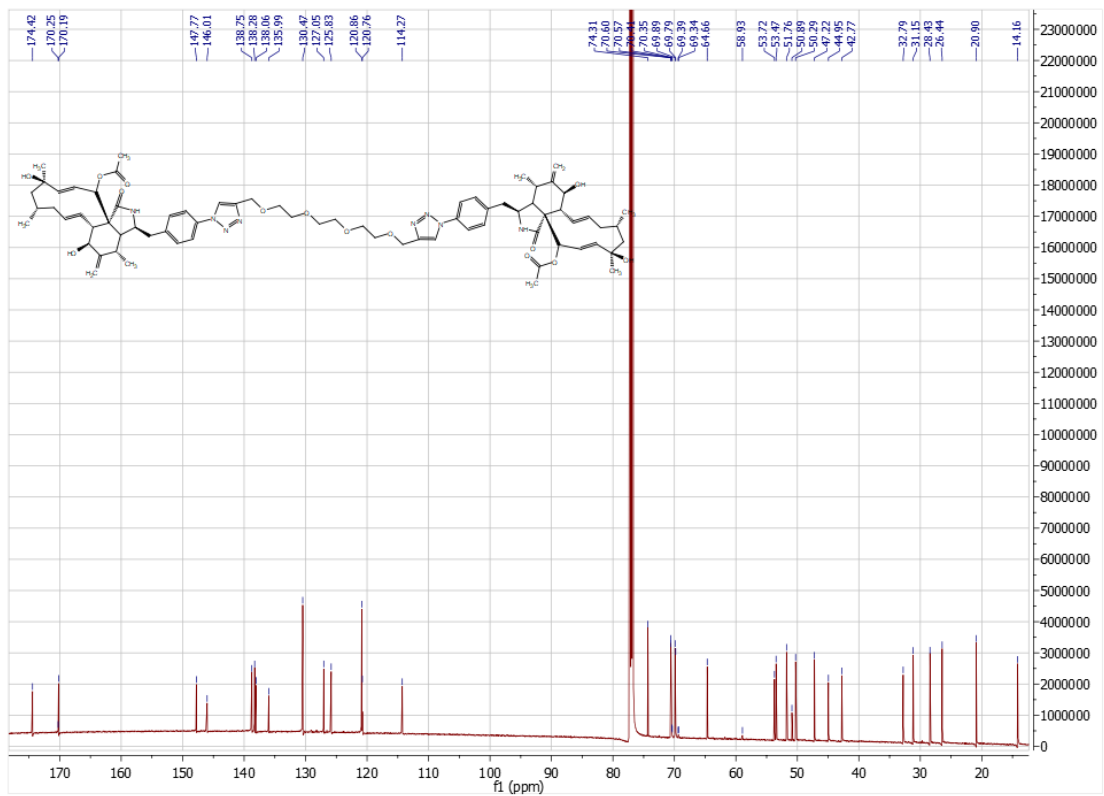



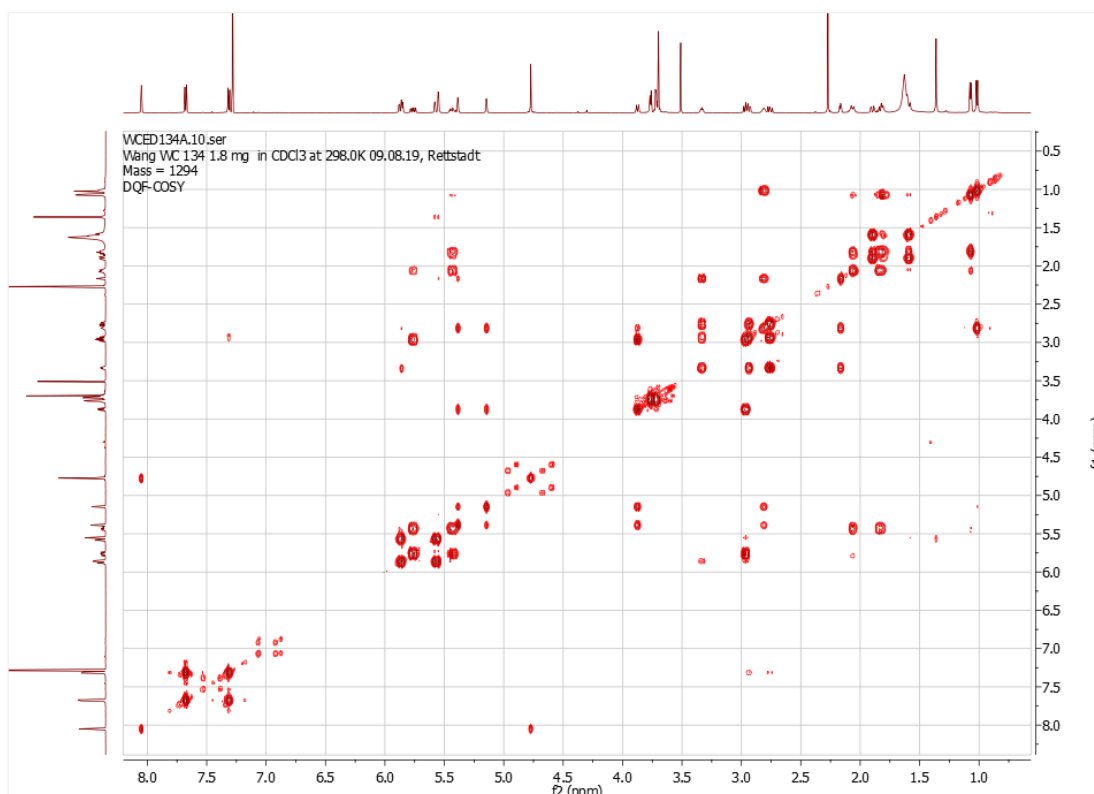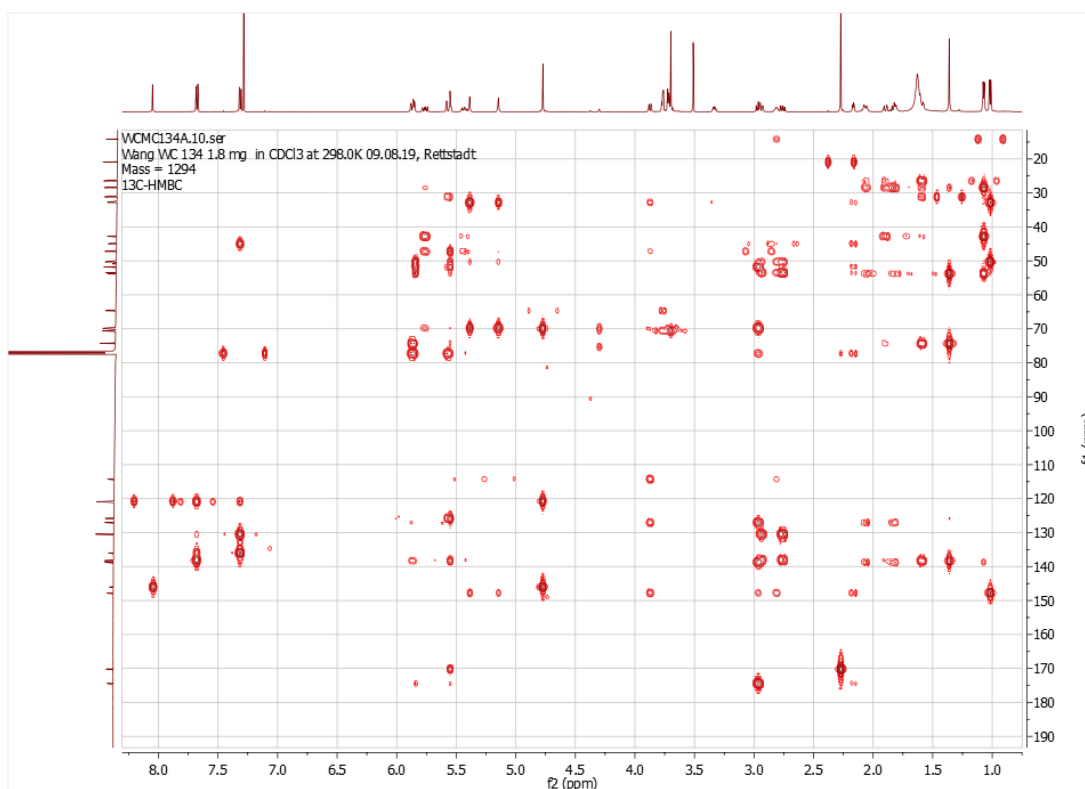

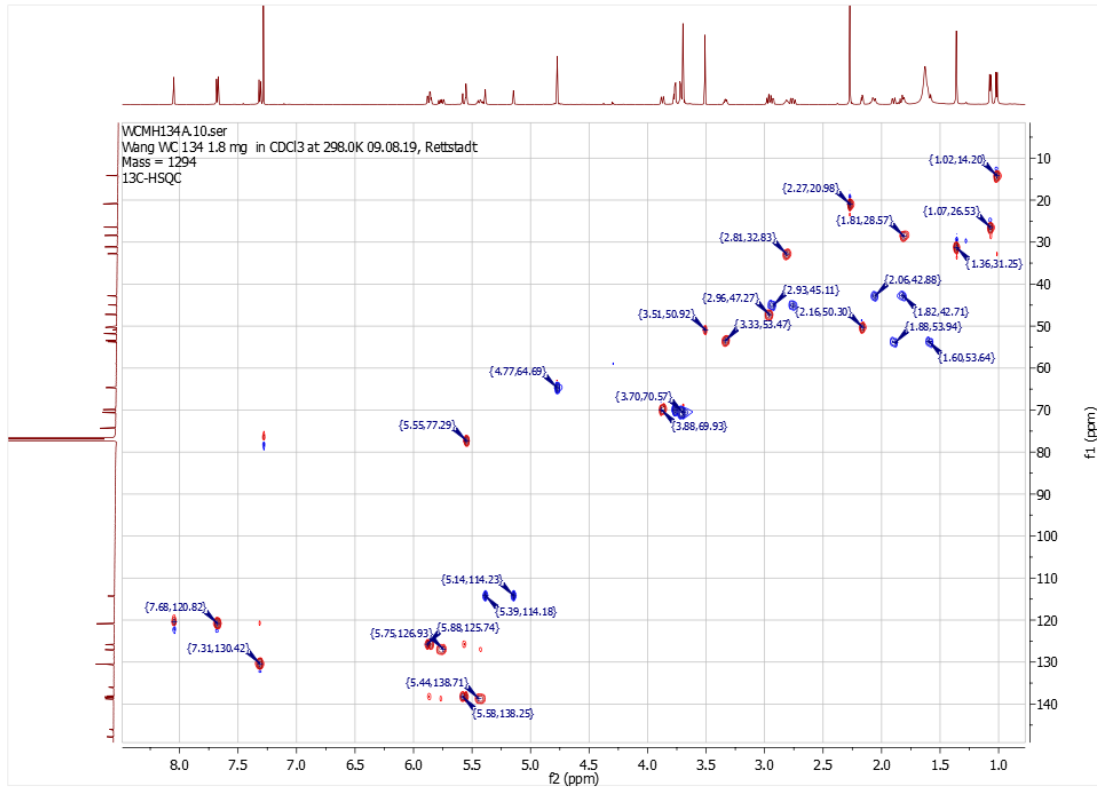

### 3.0 *In vivo* Procedures

#### 3.01 Growth Inhibition of Fungal Strains

Pyrichalasin H **1a** and compounds **1e** - **27** (Table 3.1) were subjected to a serial dilution assay in 96-well plate format, with selected microorganisms grown for 24 (*S. pombe*, *P. anomala*, *M. hiemalis*, *R. glutinis*) and 48 hours (*C. albicans*), as described by Mulwa et al. 2018.<sup>1</sup> Inhibitory concentrations are given in  $\mu\text{M}$ . Observed alleviated, but incomplete inhibition of growth is marked in brackets.

**Table 3.1:** Growth Inhibitory concentrations of pyrichalasin H **1a** and derivatives in a serial dilution assay *versus* selected fungi. Inhibiting concentrations are given in  $\mu\text{M}$  ( $\mu\text{mol/L}$ ). n.i. = no inhibition. Lowest value = red; highest value = green.

| Compound  | <i>Schizosaccharomyces pombe</i> | <i>Pichia anomala</i> | <i>Mucor hiemalis</i> | <i>Candida albicans</i> | <i>Rhodotorula glutinis</i> |
|-----------|----------------------------------|-----------------------|-----------------------|-------------------------|-----------------------------|
| <b>1a</b> | 31.722                           | n.i.                  | (31.722)              | n.i.                    | 63.635                      |
| <b>1e</b> | 3.392                            | n.i.                  | n.i.                  | n.i.                    | 6.783                       |
| <b>1f</b> | 60.622                           | n.i.                  | n.i.                  | n.i.                    | 121.971                     |
| <b>1g</b> | 30.331                           | n.i.                  | n.i.                  | n.i.                    | 60.845                      |
| <b>1h</b> | 7.861                            | n.i.                  | 62.326                | n.i.                    | 31.067                      |
| <b>1i</b> | n.i.                             | n.i.                  | n.i.                  | n.i.                    | n.i.                        |
| <b>5a</b> | n.i.                             | n.i.                  | n.i.                  | n.i.                    | n.i.                        |
| <b>5b</b> | n.i.                             | n.i.                  | n.i.                  | n.i.                    | n.i.                        |
| <b>5c</b> | n.i.                             | n.i.                  | n.i.                  | n.i.                    | 93.806                      |
| <b>7a</b> | n.i.                             | n.i.                  | n.i.                  | n.i.                    | n.i.                        |
| <b>7b</b> | n.i.                             | n.i.                  | n.i.                  | n.i.                    | n.i.                        |
| <b>7c</b> | n.i.                             | n.i.                  | n.i.                  | n.i.                    | n.i.                        |
| <b>9</b>  | n.i.                             | n.i.                  | n.i.                  | n.i.                    | n.i.                        |
| <b>11</b> | n.i.                             | n.i.                  | n.i.                  | n.i.                    | n.i.                        |
| <b>13</b> | n.i.                             | n.i.                  | n.i.                  | n.i.                    | n.i.                        |
| <b>15</b> | 78.143                           | n.i.                  | 19.361                | 4.899                   | 78.143                      |
| <b>17</b> | 12.264                           | n.i.                  | n.i.                  | n.i.                    | 49.499                      |
| <b>19</b> | n.i.                             | n.i.                  | n.i.                  | n.i.                    | n.i.                        |
| <b>21</b> | n.i.                             | n.i.                  | n.i.                  | n.i.                    | n.i.                        |
| <b>22</b> | 126.106                          | n.i.                  | n.i.                  | n.i.                    | n.i.                        |
| <b>23</b> | 108.175                          | n.i.                  | n.i.                  | n.i.                    | n.i.                        |
| <b>24</b> | n.i.                             | n.i.                  | n.i.                  | n.i.                    | n.i.                        |
| <b>25</b> | n.i.                             | n.i.                  | n.i.                  | n.i.                    | n.i.                        |
| <b>27</b> | n.i.                             | n.i.                  | n.i.                  | n.i.                    | n.i.                        |

### 3.02 Cytotoxicity Assays

Cytotoxicity was assessed by subjection of pyrichalasin H **1a** and synthetic derivatives **1e** - **27** (Table 3.2) to a standardized metabolic activity test using 3-(4,5-dimethylthiazol-2-yl)-2,5-diphenyltetrazoliumbromide (MTT) on mouse fibroblast cells (L929) and different cancer cell lines (cervix cancer, KB3.1; prostate cancer, PC3; lung cancer, A549; breast cancer, MCF-7; epidemoid carcinoma, A431; ovarian cancer, SKOV-3), as available. Concentrations are given for 50% growth inhibition observed with the no-compound control as reference<sup>1</sup> (IC<sub>50</sub> in  $\mu\text{M}$ ).

**Table 3.2:** Concentrations ( $\mu\text{M}$ ) of previously described compounds found to have metabolism-inhibitory effects according to the MTT assay half-maximal to complete inhibition (IC<sub>50</sub>). Epothilon B served as the inhibited-growth negative control.

\* = no visible effect; \*\* = small proliferation inhibition; n.d. = not determined. Lowest value = red; highest value = green.

| Compound  | L929   | KB3.1  | PC3    | A549  | MCF-7  | A431  | SKOV-3 |
|-----------|--------|--------|--------|-------|--------|-------|--------|
| <b>1a</b> | 0.21   | 0.036  | 0.153  | 0.067 | 0.055  | 0.044 | 0.034  |
| <b>1e</b> | 0.128  | 0.019  | 1.292  | 0.032 | 0.015  | 0.016 | 0.021  |
| <b>1f</b> | 0.419  | 0.273  | 0.255  | 0.273 | 0.455  | 0.291 | 0.419  |
| <b>1g</b> | 0.329  | 0.08   | 0.183  | 0.256 | 0.164  | 0.183 | 0.238  |
| <b>1h</b> | 0.082  | 0.036  | 0.071  | n.d.  | 0.026  | n.d.  | n.d.   |
| <b>1i</b> | 2.3601 | 0.393  | 60.005 | n.d.  | 0.452  | n.d.  | n.d.   |
| <b>5a</b> | 10.621 | 1.445  | 2.089  | 4.353 | 1.254  | 1.915 | 2.089  |
| <b>5b</b> | 0.503  | 0.22   | 6.286  | n.d.  | 0.22   | n.d.  | n.d.   |
| <b>5c</b> | 0.364  | 0.518  | 1.82   | 2.38  | 1.68   | 0.504 | 1.386  |
| <b>7a</b> | **     | 19.599 | n.d.   | n.d.  | 30.623 | n.d.  | n.d.   |
| <b>7b</b> | **     | 40.944 | n.d.   | n.d.  | n.d.   | n.d.  | n.d.   |
| <b>7c</b> | **     | 14.211 | n.d.   | n.d.  | n.d.   | n.d.  | n.d.   |
| <b>9</b>  | *      | **     | n.d.   | n.d.  | n.d.   | n.d.  | n.d.   |
| <b>11</b> | 25.375 | 6.84   | n.d.   | n.d.  | 17.652 | n.d.  | n.d.   |
| <b>13</b> | 43.305 | 4.565  | **     | n.d.  | 3.745  | n.d.  | n.d.   |
| <b>15</b> | 2.799  | 0.606  | 1.749  | 2.333 | 1.061  | 1.633 | 0.805  |
| <b>17</b> | 0.096  | 0.021  | 0.096  | 0.051 | 0.055  | 0.035 | 0.03   |
| <b>19</b> | 27.14  | 21.713 | n.d.   | n.d.  | n.d.   | n.d.  | n.d.   |
| <b>21</b> | 1.861  | 0.518  | 0.425  | 0.518 | 0.332  | 0.412 | 0.385  |
| <b>22</b> | 5.27   | 2.635  | 3.388  | 3.388 | 2.447  | 5.458 | 6.023  |
| <b>23</b> | 1.937  | 0.291  | 0.549  | 0.581 | 0.371  | 0.387 | 0.452  |
| <b>24</b> | 8.227  | 1.117  | 6.704  | n.d.  | 0.828  | n.d.  | n.d.   |
| <b>25</b> | 1.664  | 0.12   | 0.647  | 0.629 | 0.592  | 0.629 | 1.109  |
| <b>27</b> | **     | 6.565  | n.d.   | n.d.  | n.d.   | n.d.  | n.d.   |

### 3.03 *In vivo* Effects on the Actin Cytoskeleton

Effects on the actin cytoskeleton were characterized in further detail using osteosarcoma cells (U2OS), following the procedure described by Kretz et al. 2019.<sup>2</sup> All compounds affected the actin cytoskeleton, confirming retained activities as functionalized compounds even upon heavy modification (Figure 3.1A, Figure 3.1B).

Fluorescently-labelled cytochalasins were further investigated concerning their potential use in staining the actin cytoskeleton. Here, U2OS cells were grown on fibronectin-coated cover slips overnight similar to the methodology employed before. Untreated, well-spread cells were fixed with 500µl of warm 4% paraformaldehyde (PFA) in PBS solution for 20 minutes and washed with 500µl PBS. After cell permeabilisation with 500µl 0.1% Triton X-100 in PBS and additional washing steps with 500µl PBS (3x), coverslips were treated with labelled cytochalasin derivatives (100µg/ml) and fluorescently-labelled phalloidins (ALEXA 488, green fluorescence; ATTO 594, red fluorescence), in each case complementary in colour, by incubation in a wet chamber on parafilm. Samples were incubated for 1h in the dark, followed by procedures for nuclear staining and image recording, as stated above.

Initial staining attempts using **21** as a fluorophore did not show any interpretable fluorescence, thus it was excluded from future experiments (data not shown). Out of the four fluorescently-coupled derivatives, both **19** and **17** displayed a staining pattern at least partially overlapping with actin filament-containing stress fibre-like structures, as confirmed by counterstaining with phalloidin (Fig. 3.2). However, in follow-up experiments, stainings appeared more specific with **17**. Moreover, signal intensities with **17** were further improved upon inclusion of 0.25% glutaraldehyde (GA, Fig. 3.3) as fixative as compared to using 4% para-formaldehyde (PFA, Fig. 3.2) alone, assumed to counteract partial filament loss seen with weaker fixatives such as PFA.<sup>3</sup> Notably, unspecific staining patterns obtained with **13** and **15** were not improved further upon addition of 0.25% GA.

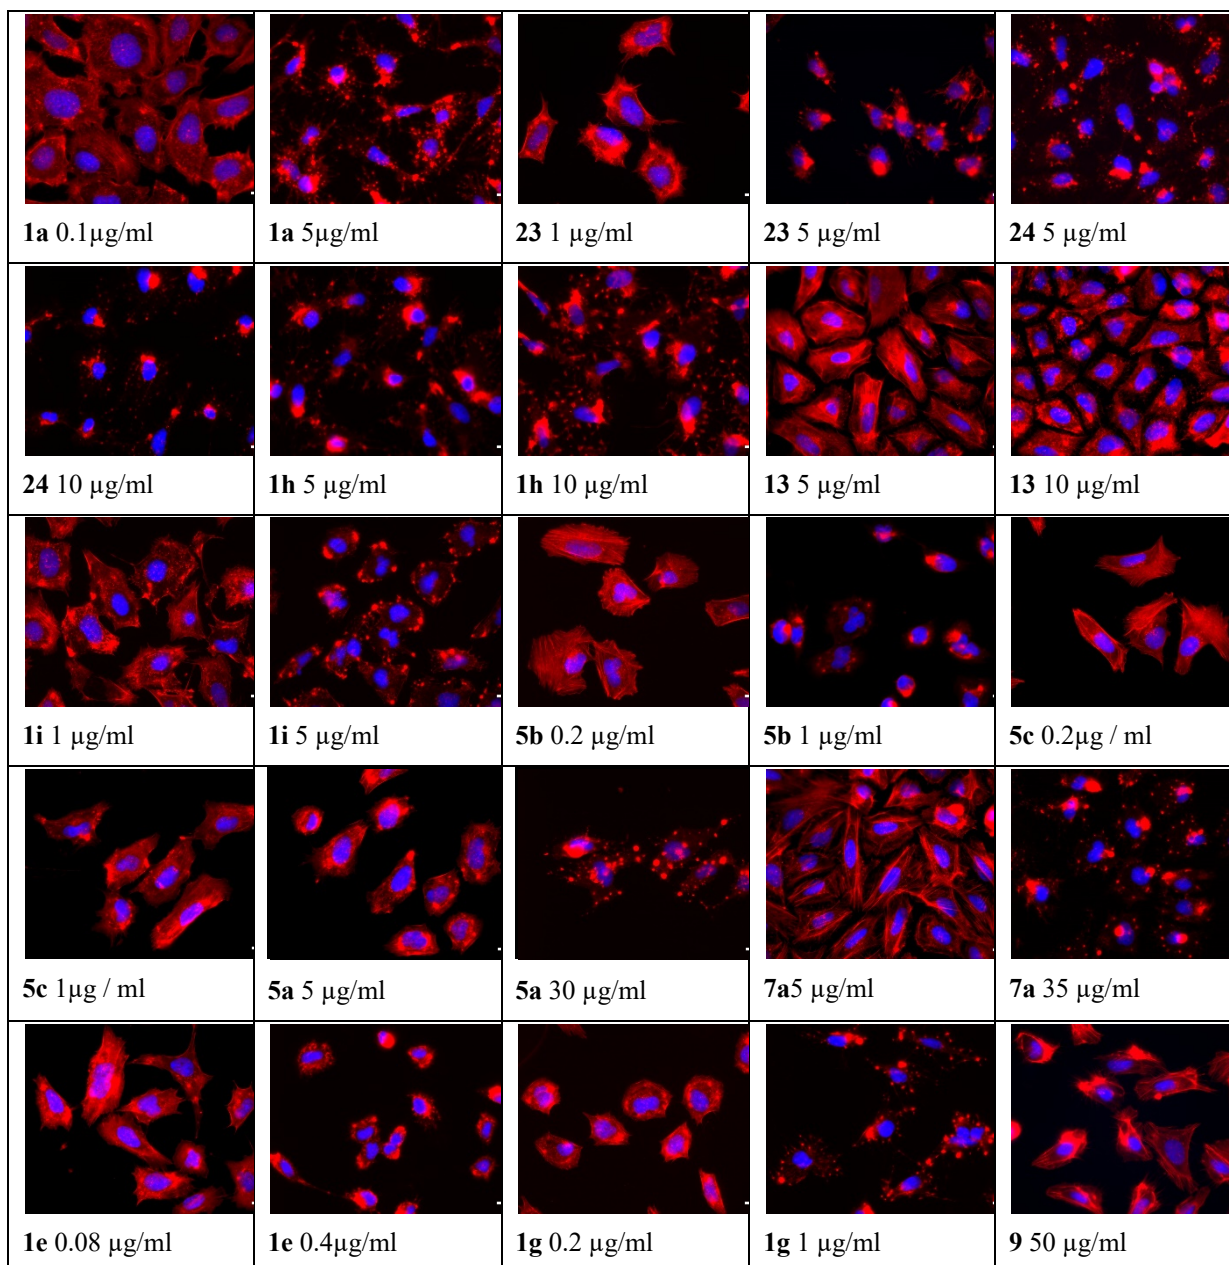

**Figure 3.1A:** Summary of fluorescence microscopy images showing the actin cytoskeleton (pseudocoloured in red) stained by fluorescently-coupled phalloidin (atto 594) and nuclei stained by DAPI (blue). DMSO served as a vehicle control. U2OS cells were treated for 1 hour with respective compound and concentration, and directly fixed with 4% PFA. Images show the collapse of cytoskeletal actin to different degrees of severity. See Figure 3.1B for the effect of cytochalasin B (CytB).

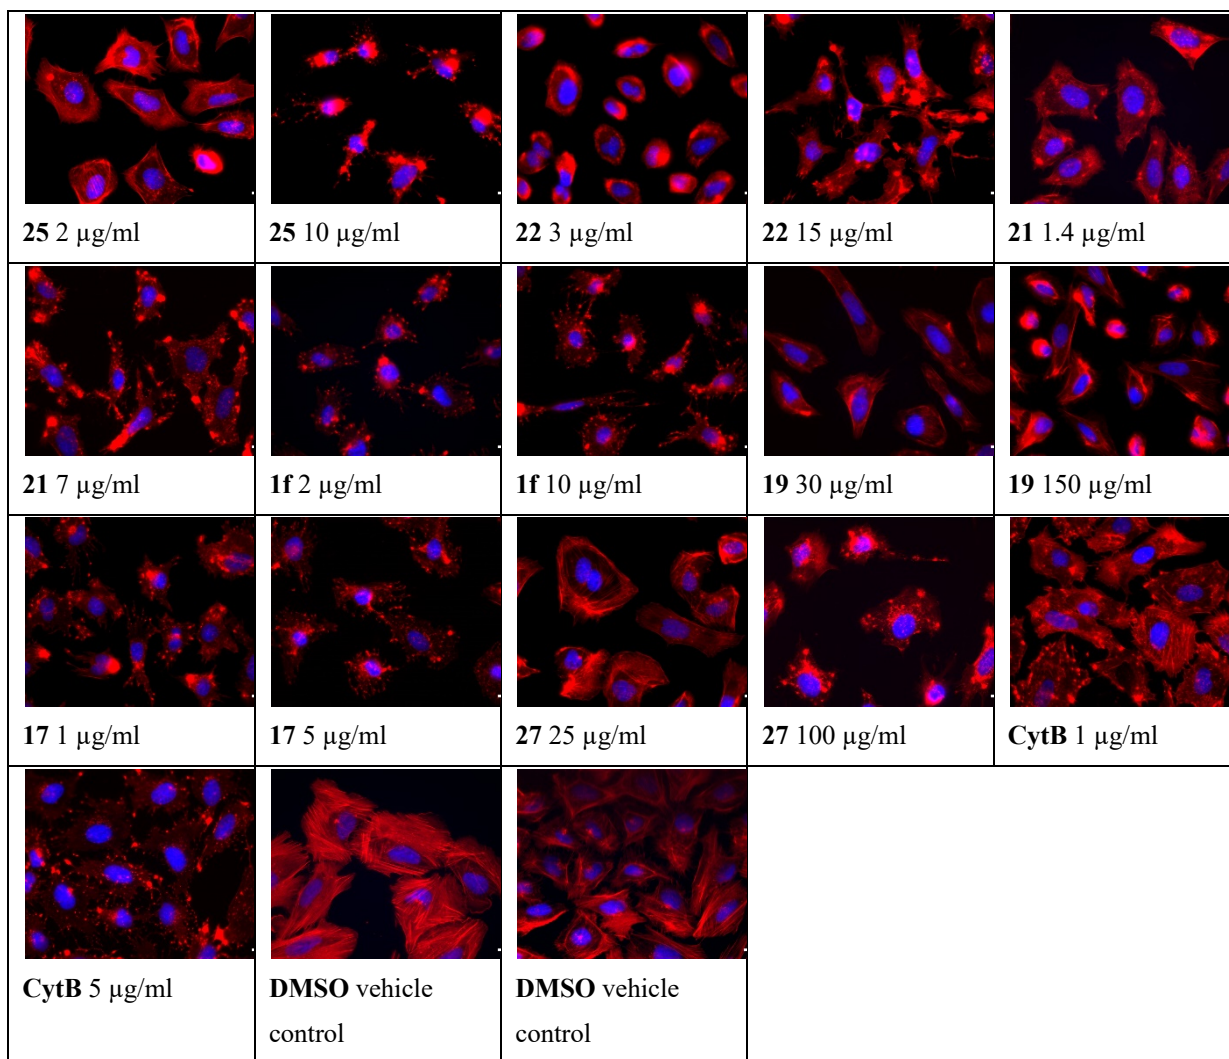

**Figure 3.1B:** Summary of fluorescence microscopy images showing the actin cytoskeleton (pseudocoloured in red) stained by fluorescently-coupled phalloidin (atto 594) and nuclei stained by DAPI (blue). DMSO served as a vehicle control. U2OS cells were treated for 1 hour with respective compound and concentration, and directly fixed with 4% PFA. Images show the collapse of cytoskeletal actin to different degrees of severity. The effect of cytochalasin B (CytB) is shown in comparison.



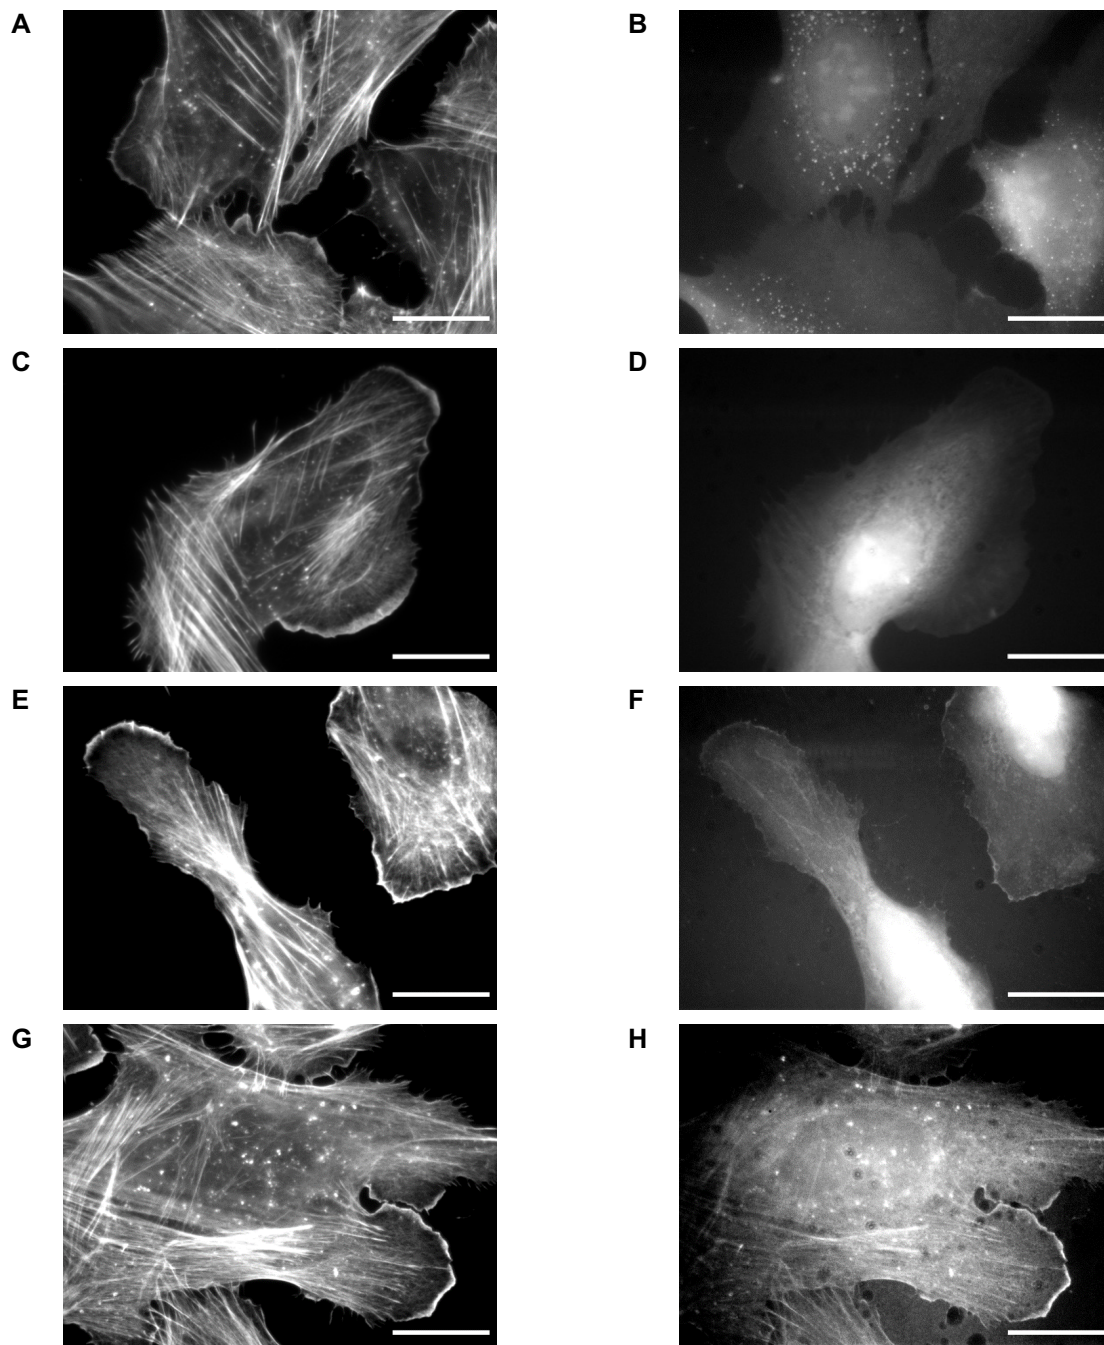

**Figure 3.2:** Fluorescence microscopy images of untreated U2OS cells simultaneously stained with fluorescently-coupled phalloidin (ALEXA 488, ATTO 594) and differentially-derivatised cytochalasin variants upon fixation with 4% PFA. **A, C, E, G:** Actin cytoskeleton stained with phalloidin. Images **B, D:** Signals obtained with **13** and **15**, respectively, and lacking any obvious specificity for the actin cytoskeleton. Image **F:** **19** displaying mostly cytosolic signal, and very weak association with actin cytoskeletal structures, such as lamellipodia-like structures at the cell periphery. Image **H:** More prominent association of **17** with the actin cytoskeleton. Note that prominently stained structures at least partly overlap with the phalloidin staining in image **G**. Scale = 20 $\mu$ m.



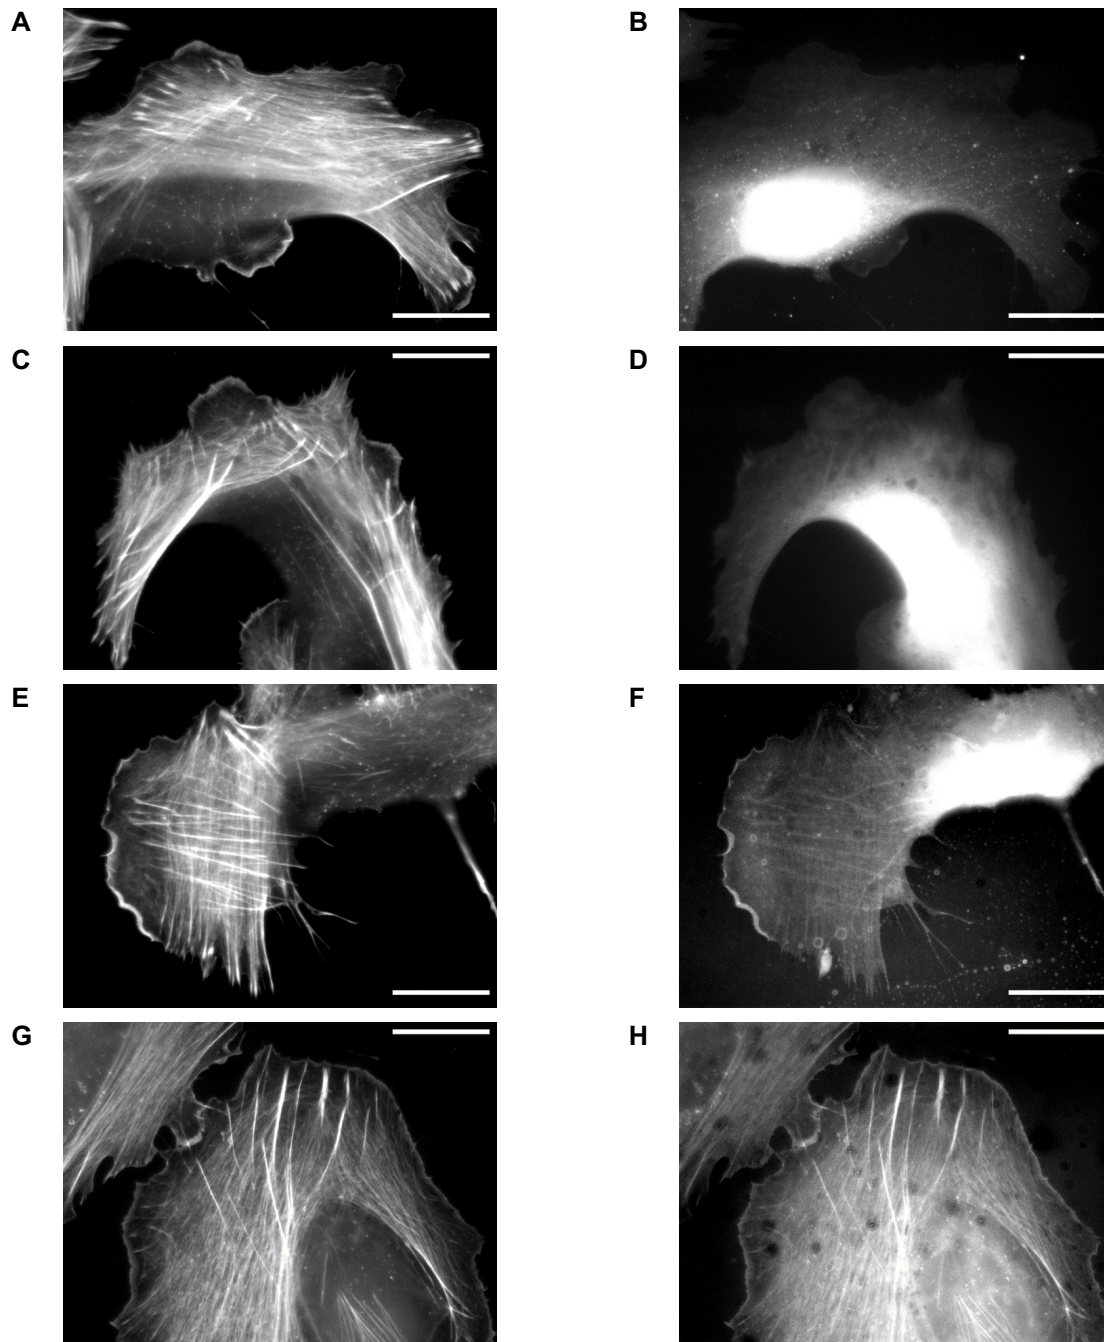

**Figure 3.3:** Fluorescence microscopy of untreated U2OS cells simultaneously stained with fluorescently-coupled phalloidin (ALEXA 488, ATTO 594) and cytochalasin derivatives upon fixation with 4% para-formaldehyde (PFA) and 0.25% glutaraldehyde (GA). **A, C, E, G:** Actin cytoskeleton as stained with phalloidin. Images **B, D:** lack of association with the actin cytoskeleton, as already observed for **13** and **15** upon fixation with PFA alone (Figure 3.2). Image **F:** Clearly discernible staining of actin cytoskeletal structures with **19**, which appears enhanced upon PFA/GA-fixation as compared to PFA alone (see Figure 3.2), and **H: 17** displaying quite robust labelling of actin filament networks, reasonably well overlapping in these conditions with the phalloidin staining in G. Scale bars = 20 $\mu$ m.

#### 4.0 References

---

1. Mulwa LS, Jansen R, Praditya DF, Mohr KI, Okanya PW, Wink J, Steinmann E and Stadler M (2018), Lanyamycin, a macrolide antibiotic from *Sorangium cellulosum*, strain Soce 481 (Myxobacteria), *Beilstein J. Org.Chem.*, 14:1554–1562. doi: 10.3762/bjoc.14.132
2. Kretz R, Wendt L, Wongkanoun S Luangsa-ard J, Surup F, Helaly S, Noumeur S, Stadler M and Stradal T (2019), The Effect of Cytochalasins on the Actin Cytoskeleton of Eukaryotic Cells and Preliminary Structure–Activity Relationships, *Biomolecules*, 9(2):73. doi: 10.3390/biom9020073
3. Mies B, Rottner K, Small, JV (1997), Immunofluorescence microscopy of the cytoskeleton: Double and triple immunofluorescence II. In “Cell Biology: A Laboratory Handbook”, 2nd Edition (ed. J.E. Celis), Academic Press.
